# Supplementary material for: Zirconium-catalyzed asymmetric Kabachnik–Fields reactions of aromatic and aliphatic aldehydes
Source: Chem Sci. 2021 Aug 3;12(37):12333–45. doi: 10.1039/d1sc03222d (PMC8480333; doi:10.1039/d1sc03222d)

**Supporting Information (NMR spectra) For:  
Zirconium-Catalyzed Asymmetric Kabachnik-Fields Reactions of Aromatic and  
Aliphatic Aldehydes**

Yijing Dai, Li Zheng, Debarshi Chakraborty,, Babak Borhan and William D. Wulff,\*  
Department of Chemistry, Michigan State University, East Lansing, MI 48824 [wulff@chemistry.msu.edu](mailto:wulff@chemistry.msu.edu)

Table of Content

| Compound | Page   | Compound | Page       |
|----------|--------|----------|------------|
| 80       | 1, 2   | 55g      | 36         |
| 81       | 3, 4   | 102      | 37         |
| 13c      | 5, 6   | 55h      | 38         |
| 83       | 7, 8   | 55i      | 39, 40     |
| 84       | 9, 10  | 106      | 41         |
| 13d      | 11, 12 | 55j      | 42, 43     |
| 86       | 13, 14 | 108      | 44         |
| 13e      | 15, 16 | 55k      | 45         |
| 88       | 17     | 55l      | 46         |
| 13i      | 18, 19 | 55m      | 47, 48     |
| 90       | 20     | 51a      | 49, 50, 51 |
| 13j      | 21, 22 | 51b      | 52, 53     |
| 92       | 23     | 51c      | 54, 55     |
| 13k      | 24, 25 | 51d      | 56, 57     |
| 94       | 26, 27 | 51f      | 60, 61     |
| 13l      | 28, 29 | 51g      | 62, 63     |
| 31j      | 30, 31 | 51h      | 64, 65     |
| 55d      | 32     | 51i      | 66, 67, 68 |
| 55e      | 33     | 51j      | 69, 70, 71 |
| 55f      | 34     | 51k      | 72, 73     |
| 100      | 35     | 66a      | 74, 75     |

## Table of Content (Continue)

| Compound | Page   | Compound | Page          |
|----------|--------|----------|---------------|
| 66b      | 76, 77 | 66m      | 98, 99        |
| 66c      | 78, 79 | 66n      | 100, 101      |
| 66d      | 80, 81 | 66o      | 102, 103      |
| 66e      | 82, 83 | 66p      | 104, 105      |
| 66f      | 84, 85 | 66q      | 106, 107      |
| 66g      | 86, 87 | 66r      | 108, 109      |
| 66h      | 88, 89 | 68       | 110, 111      |
| 66i      | 90, 91 | 67       | 112, 113      |
| 66j      | 92, 93 | 111      | 114, 115      |
| 66k      | 94, 95 | 70       | 116, 117, 118 |
| 66l      | 96, 97 |          |               |

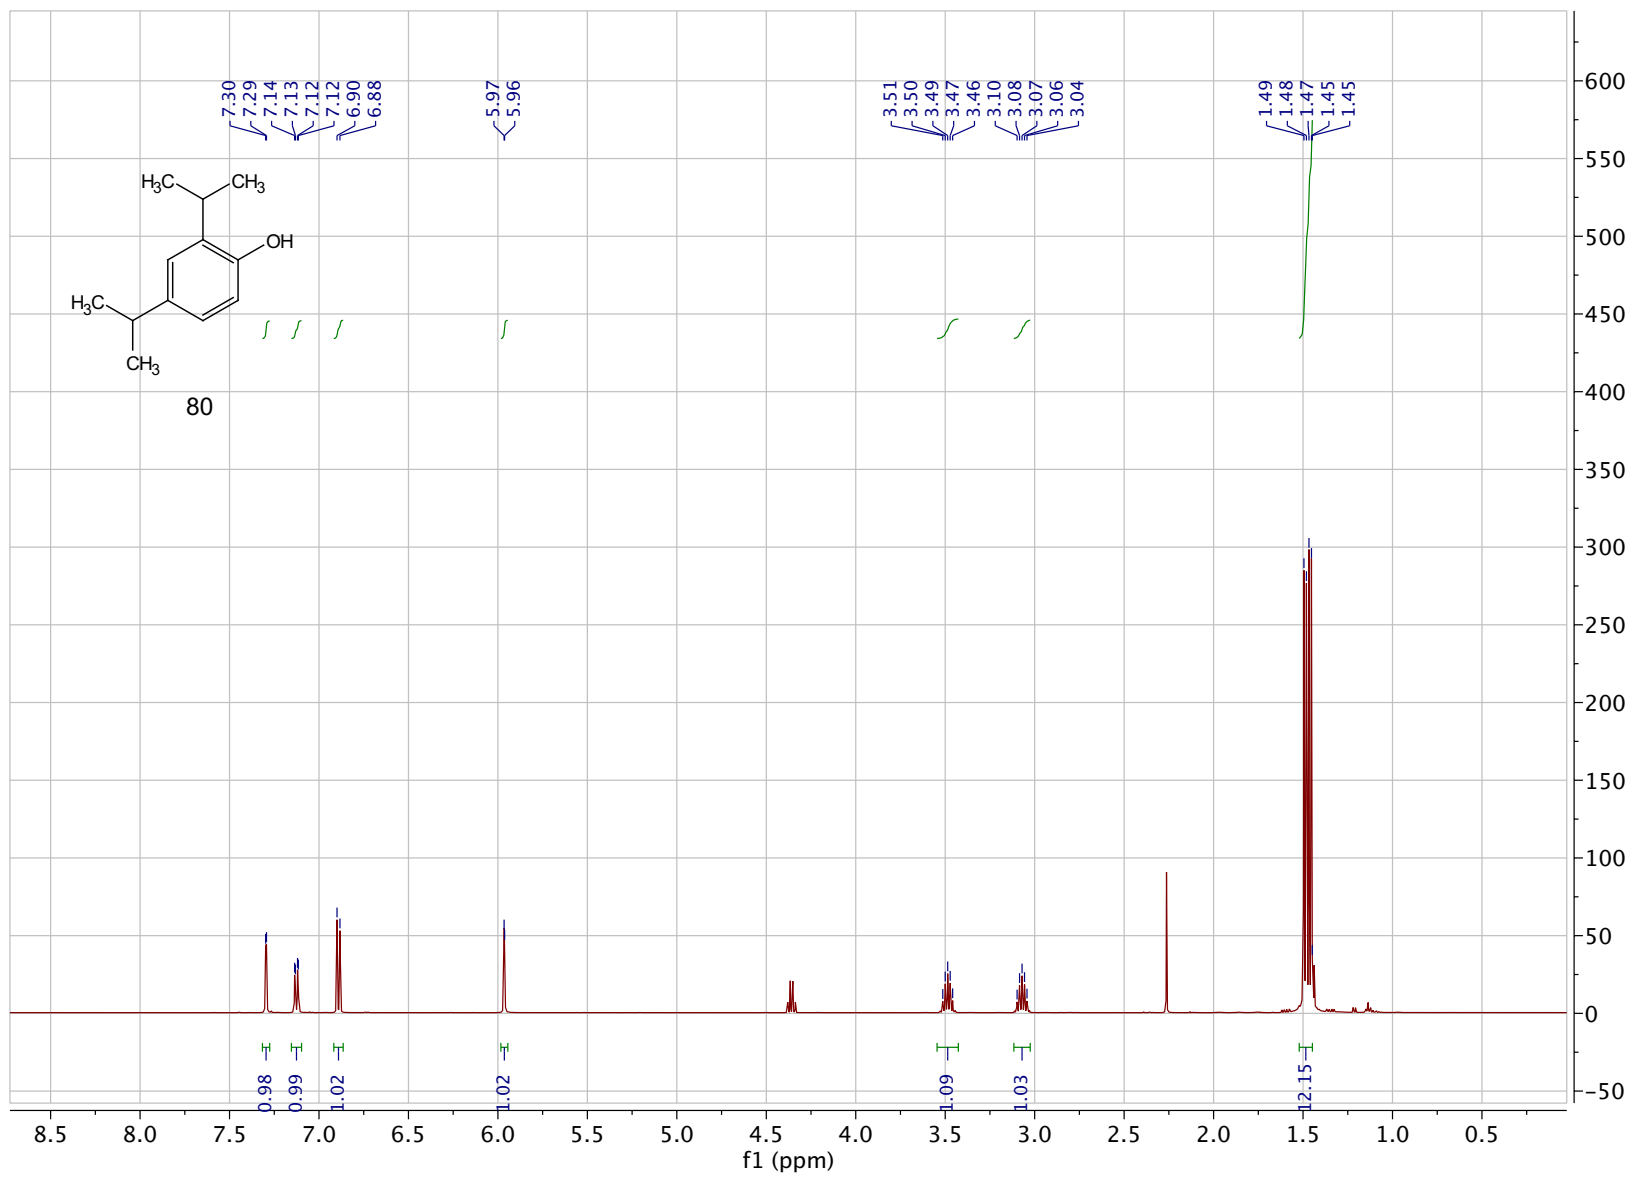

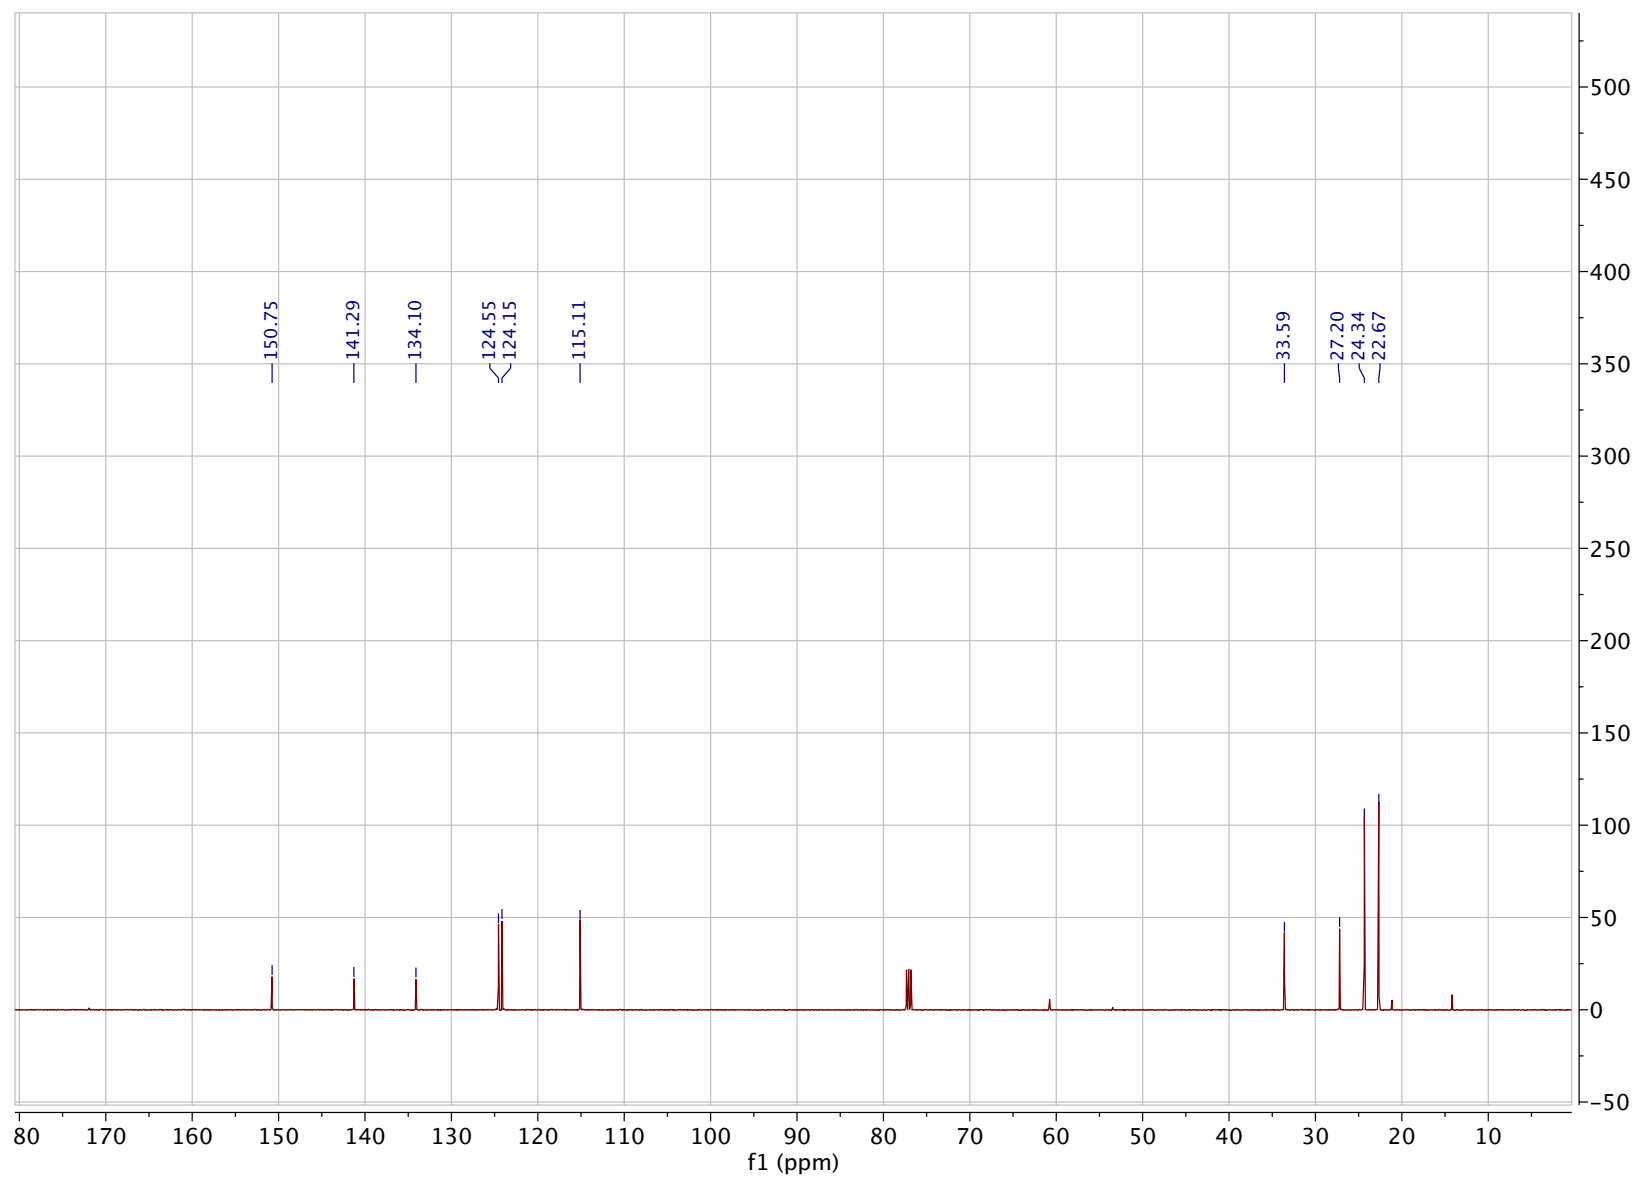

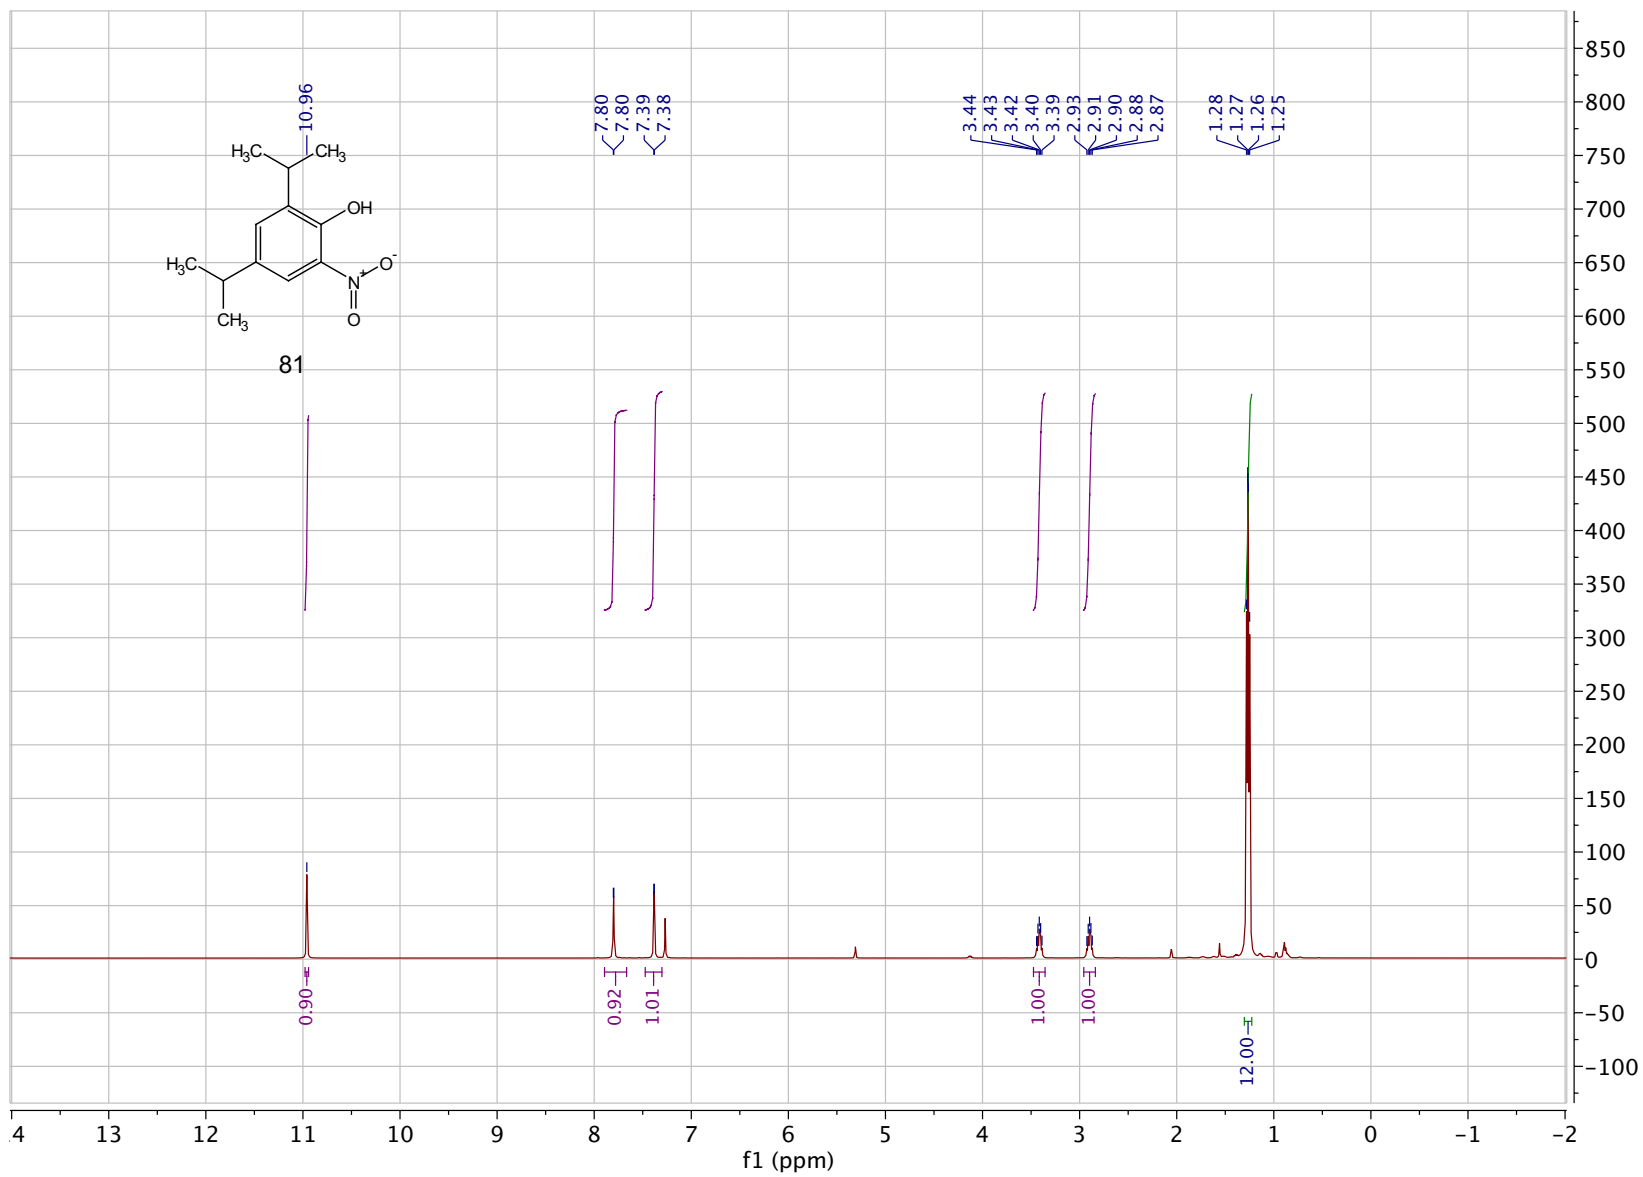

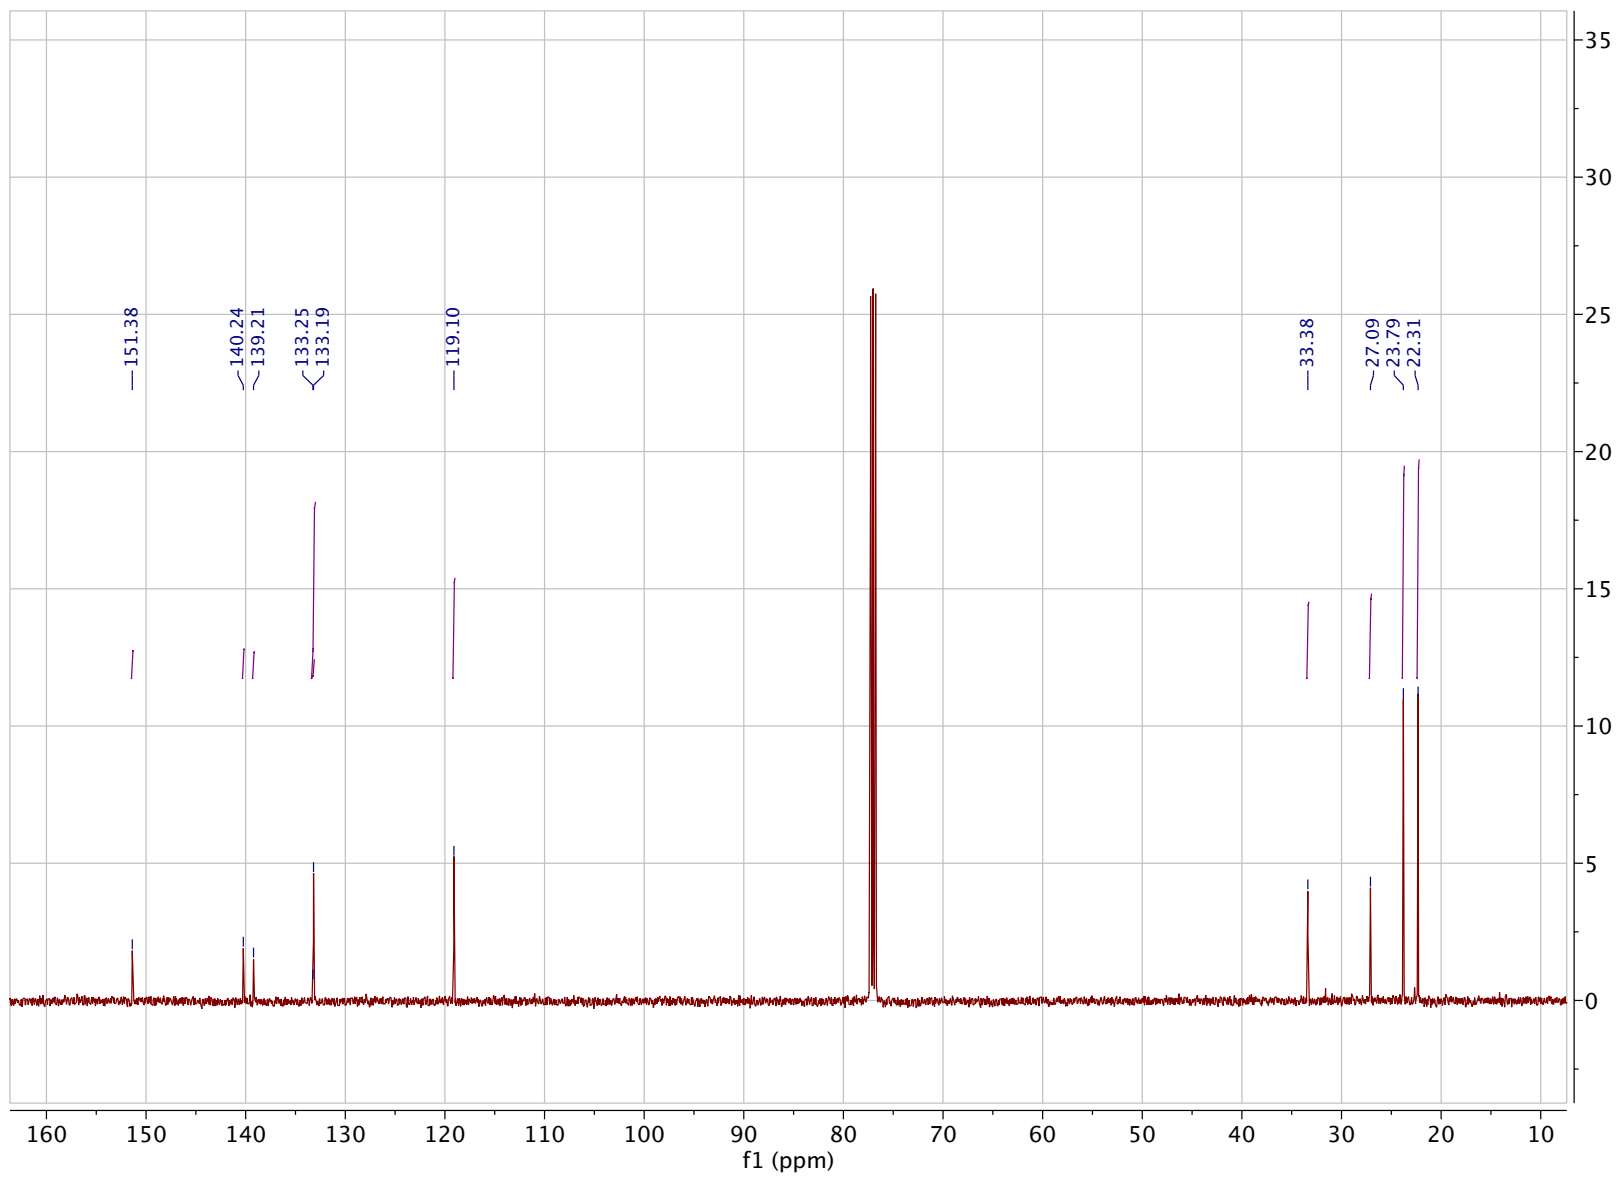

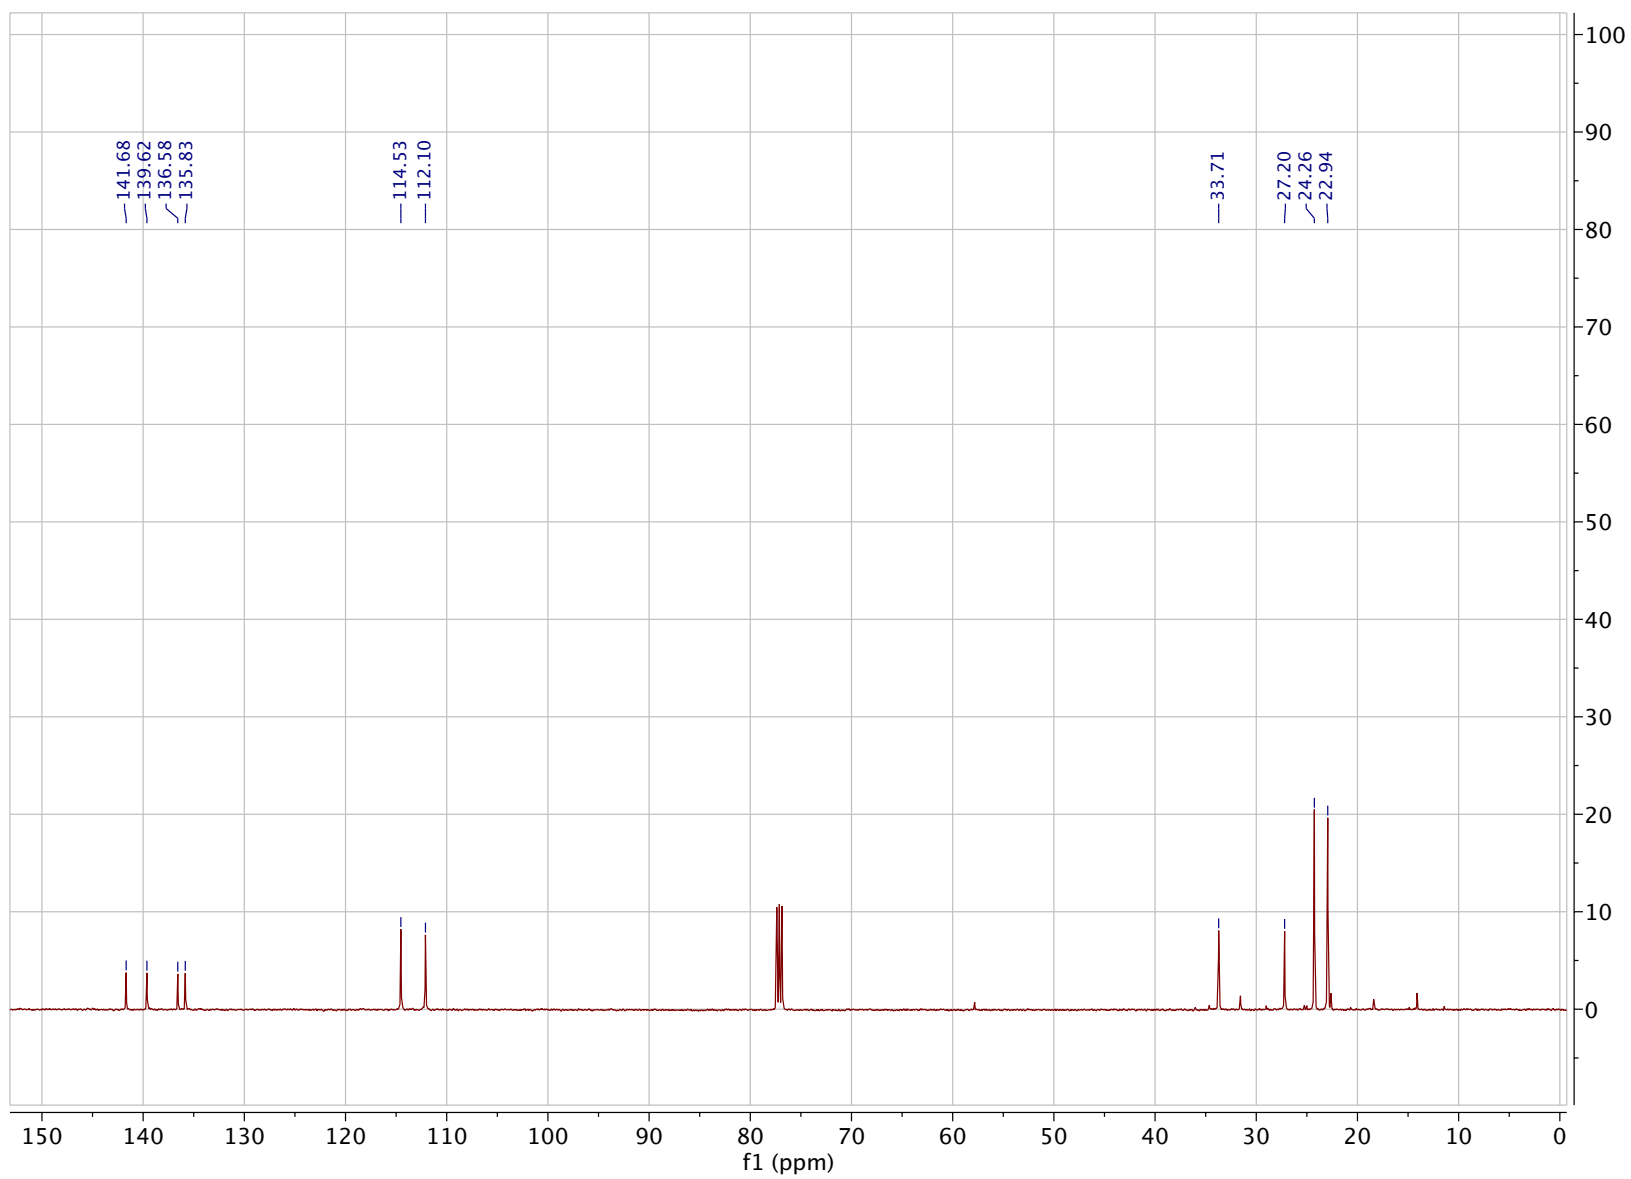

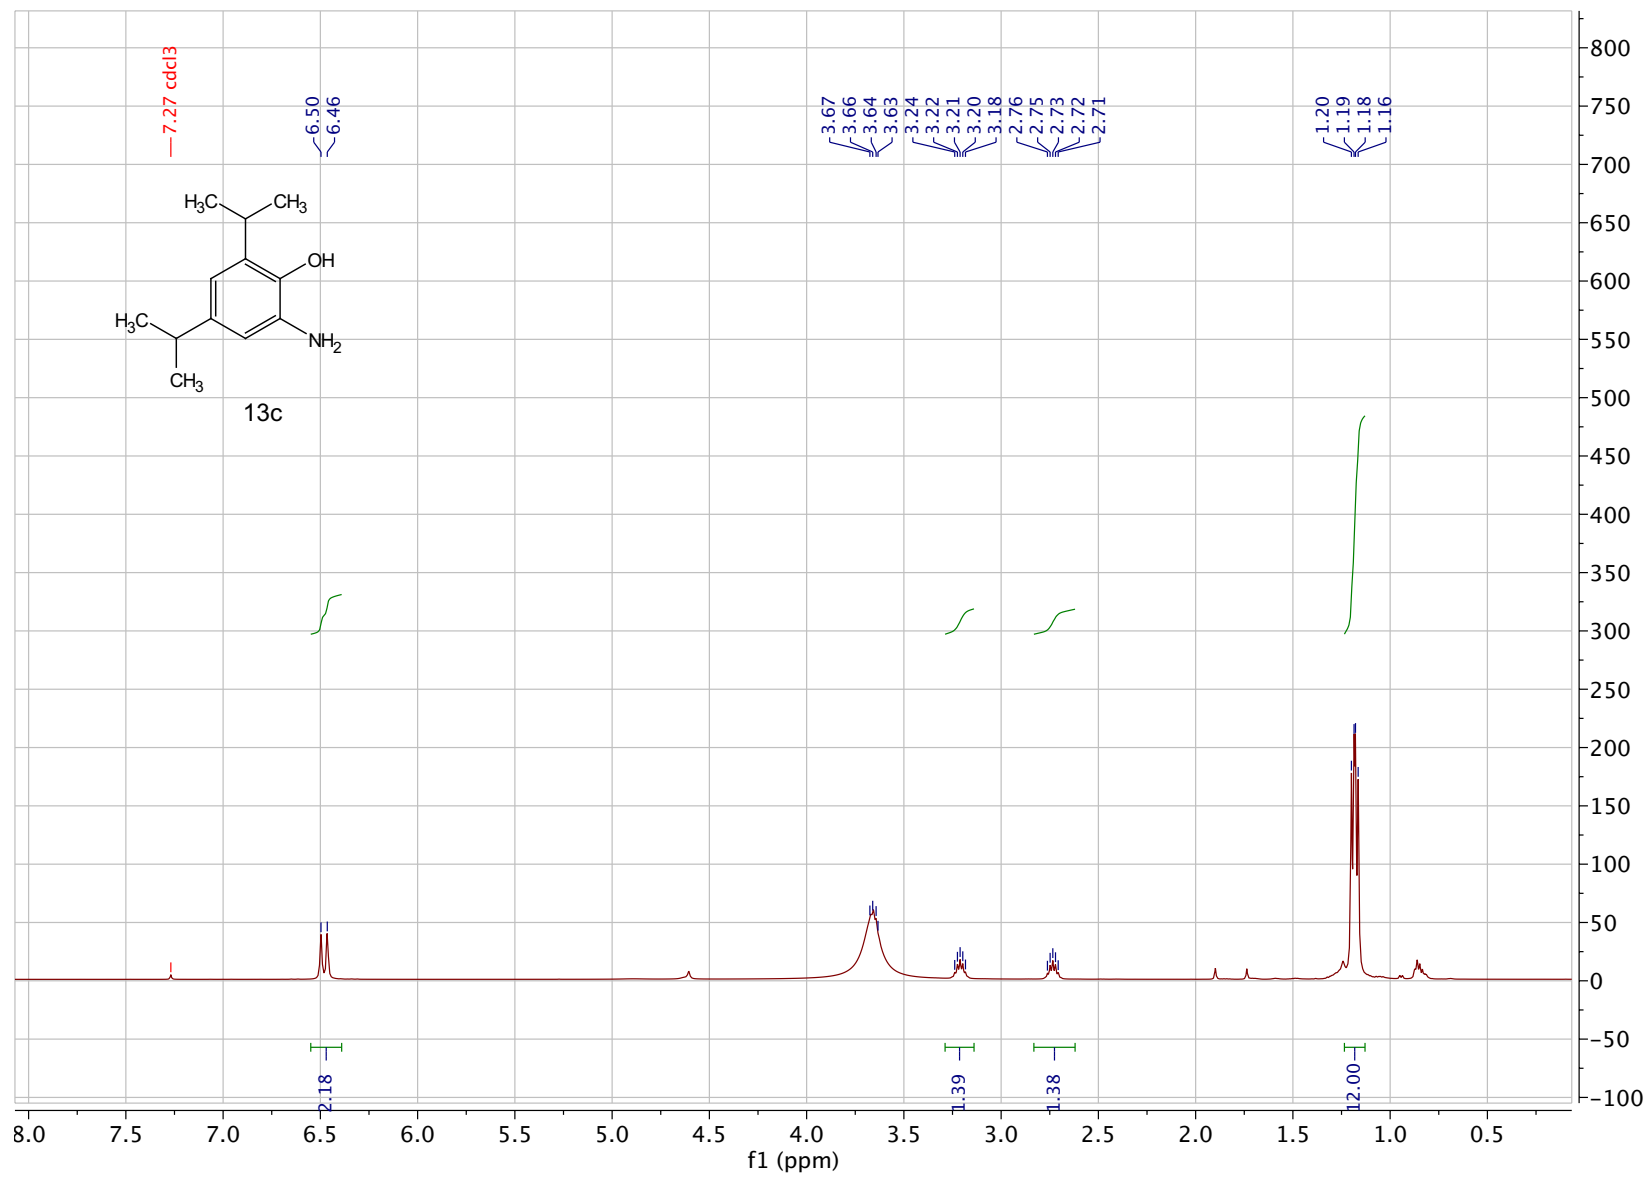

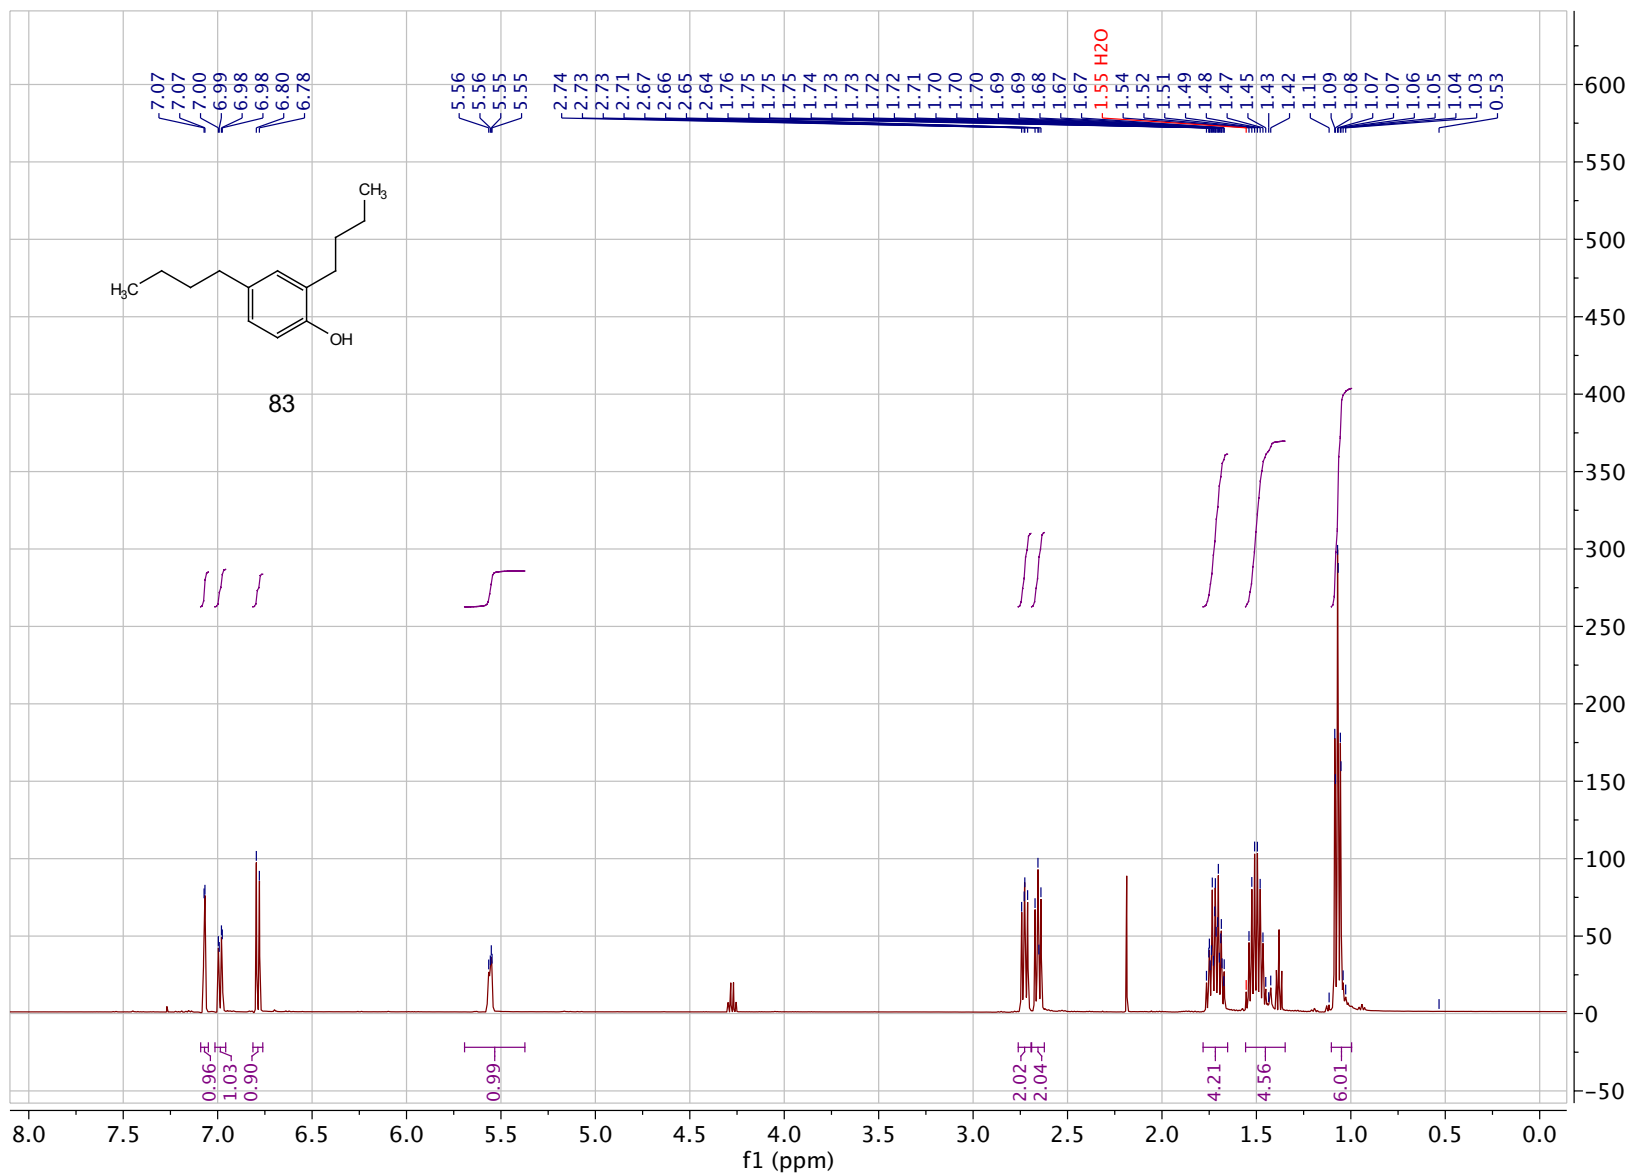

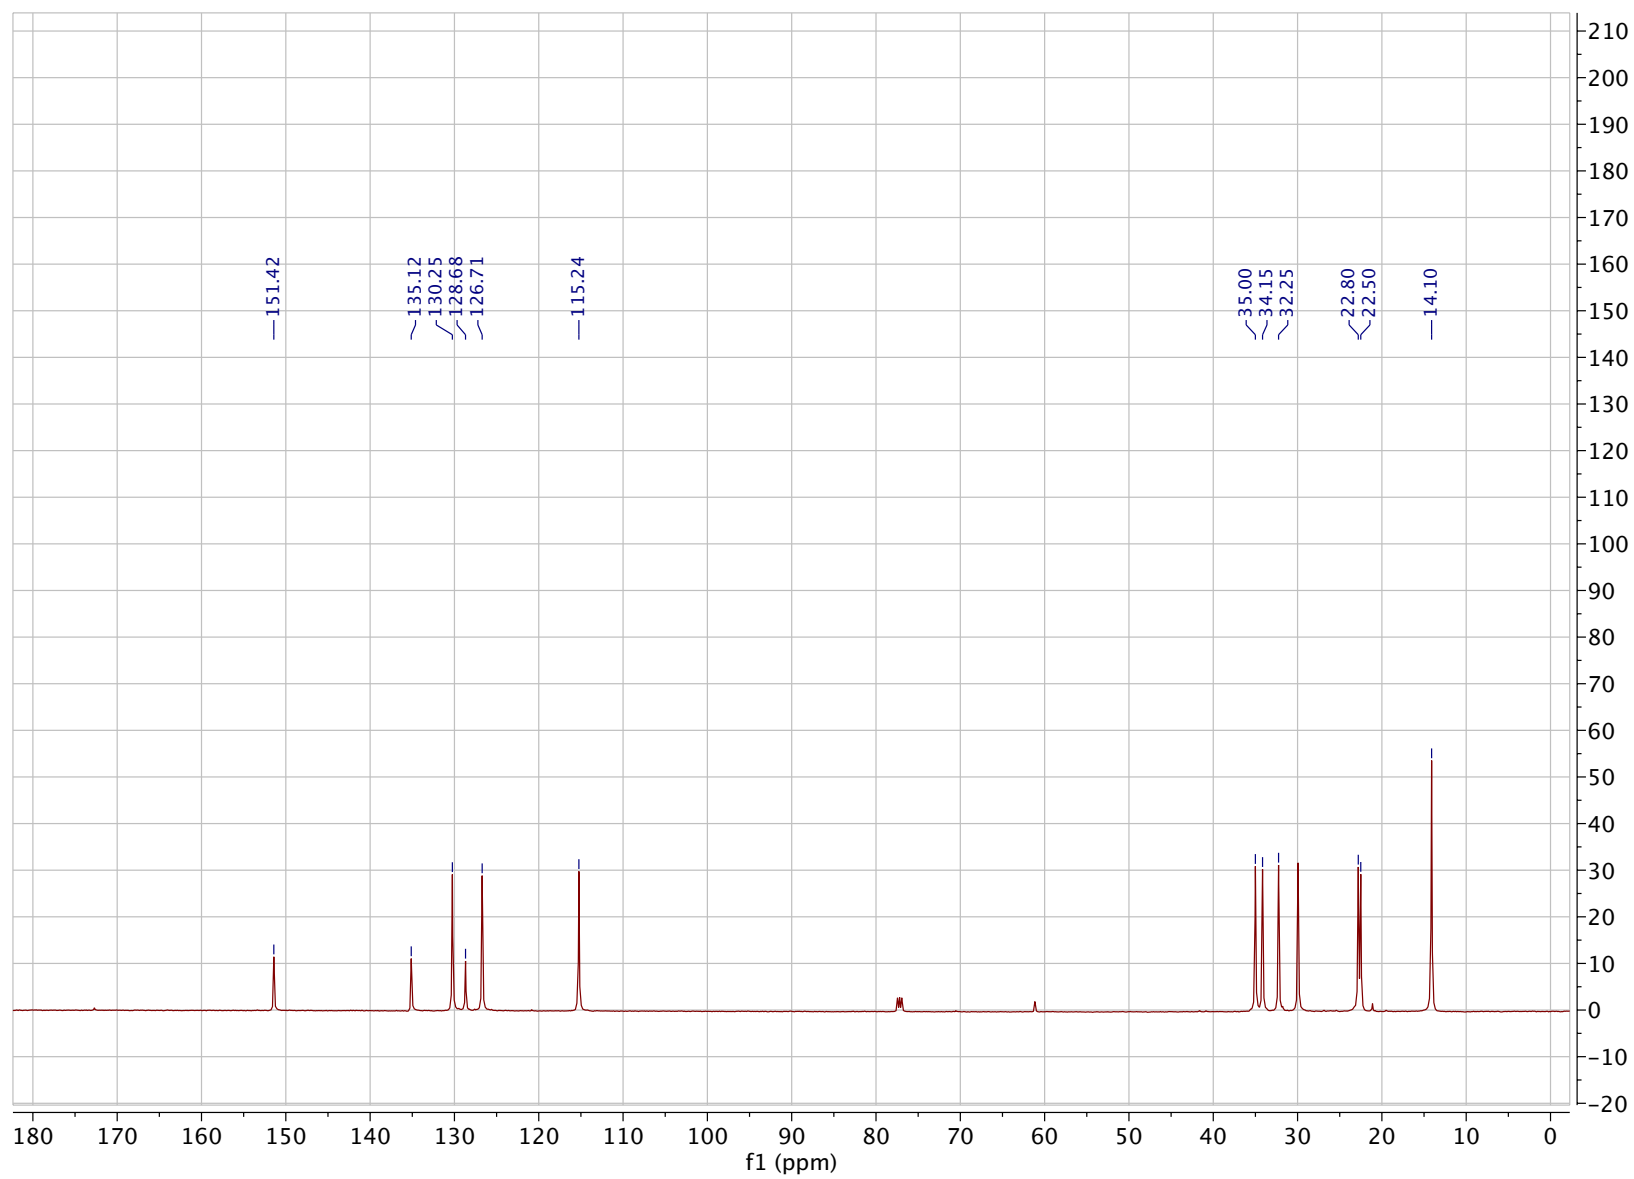

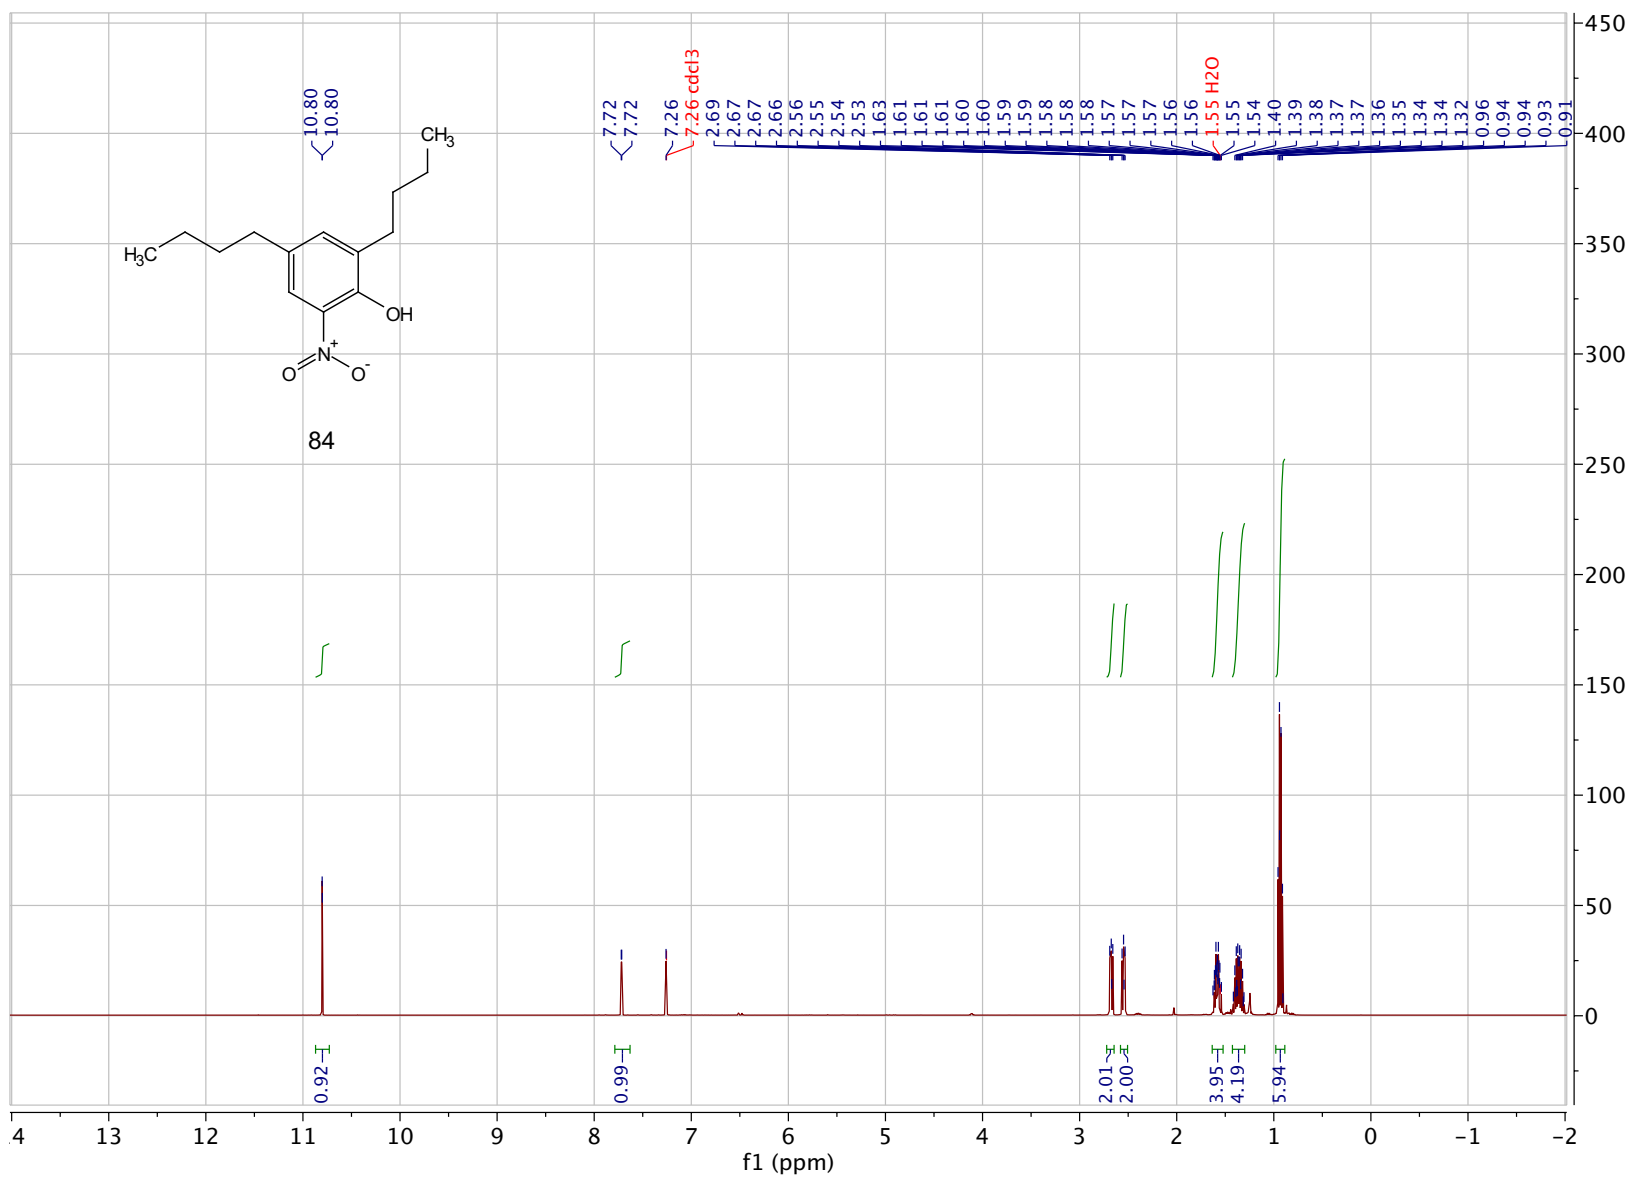

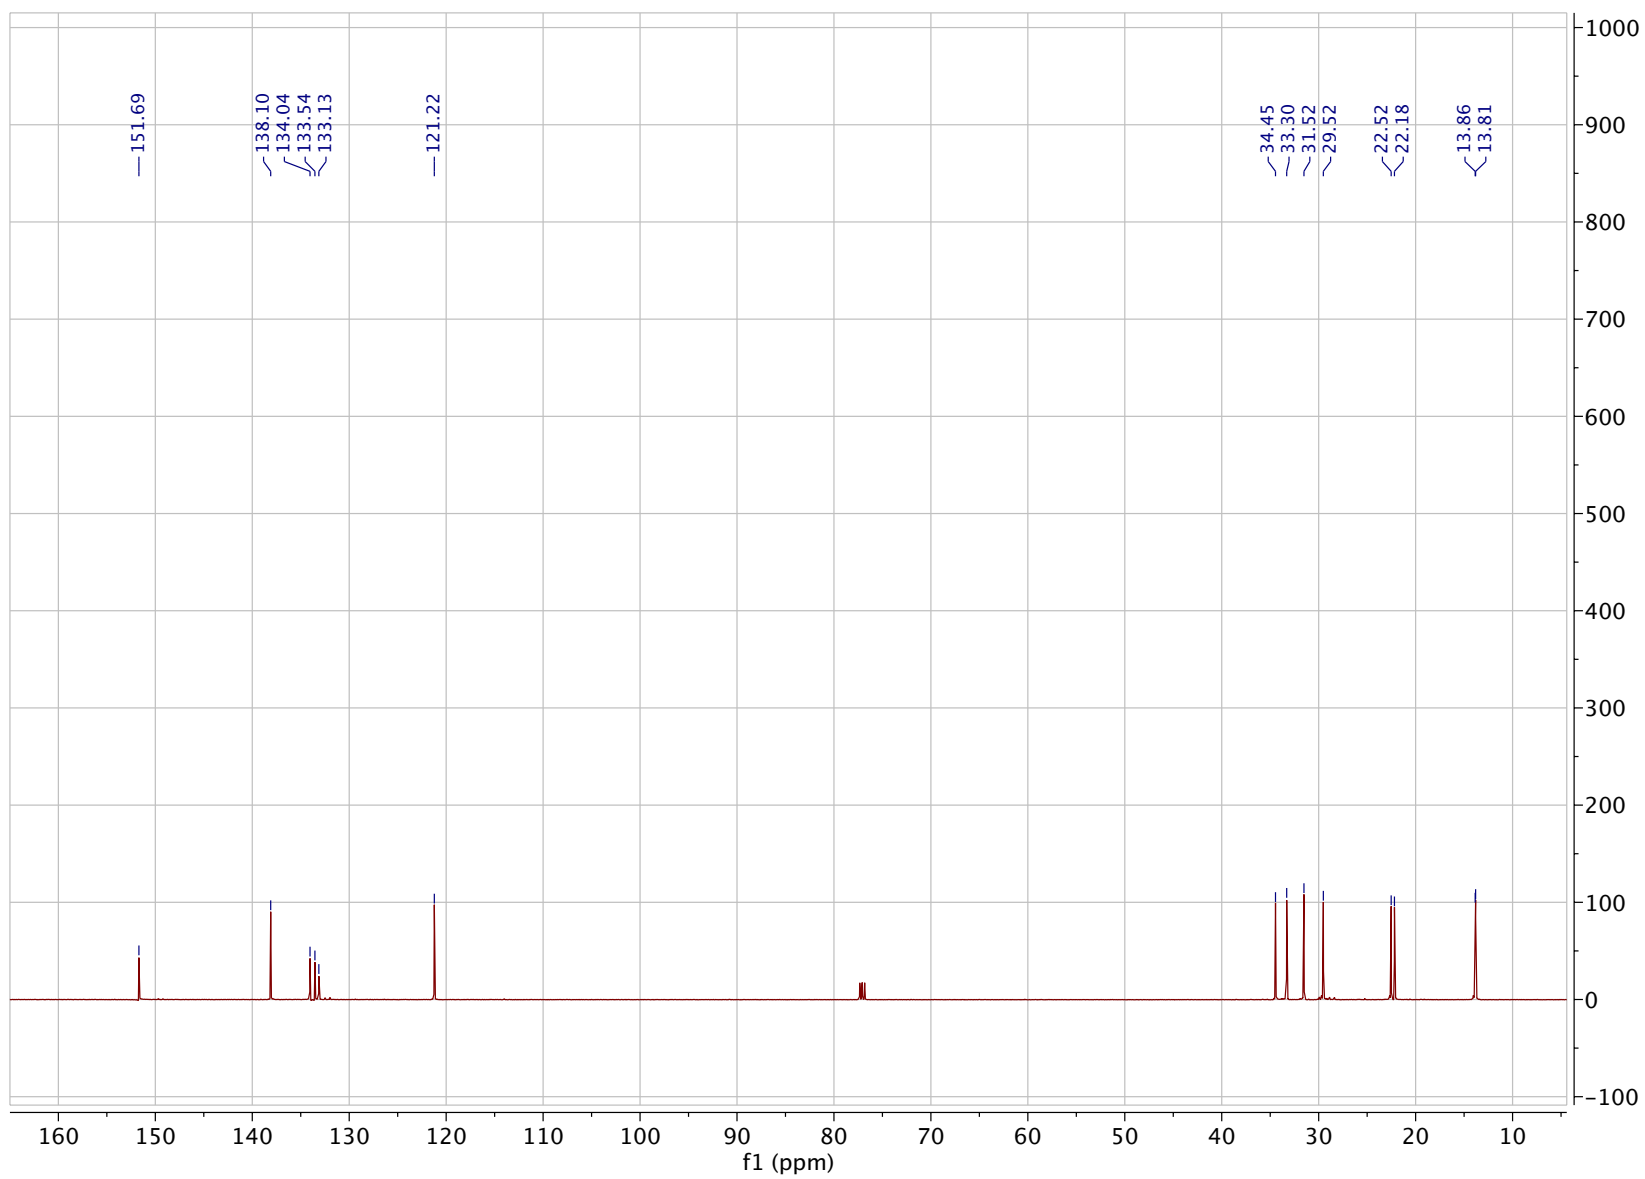

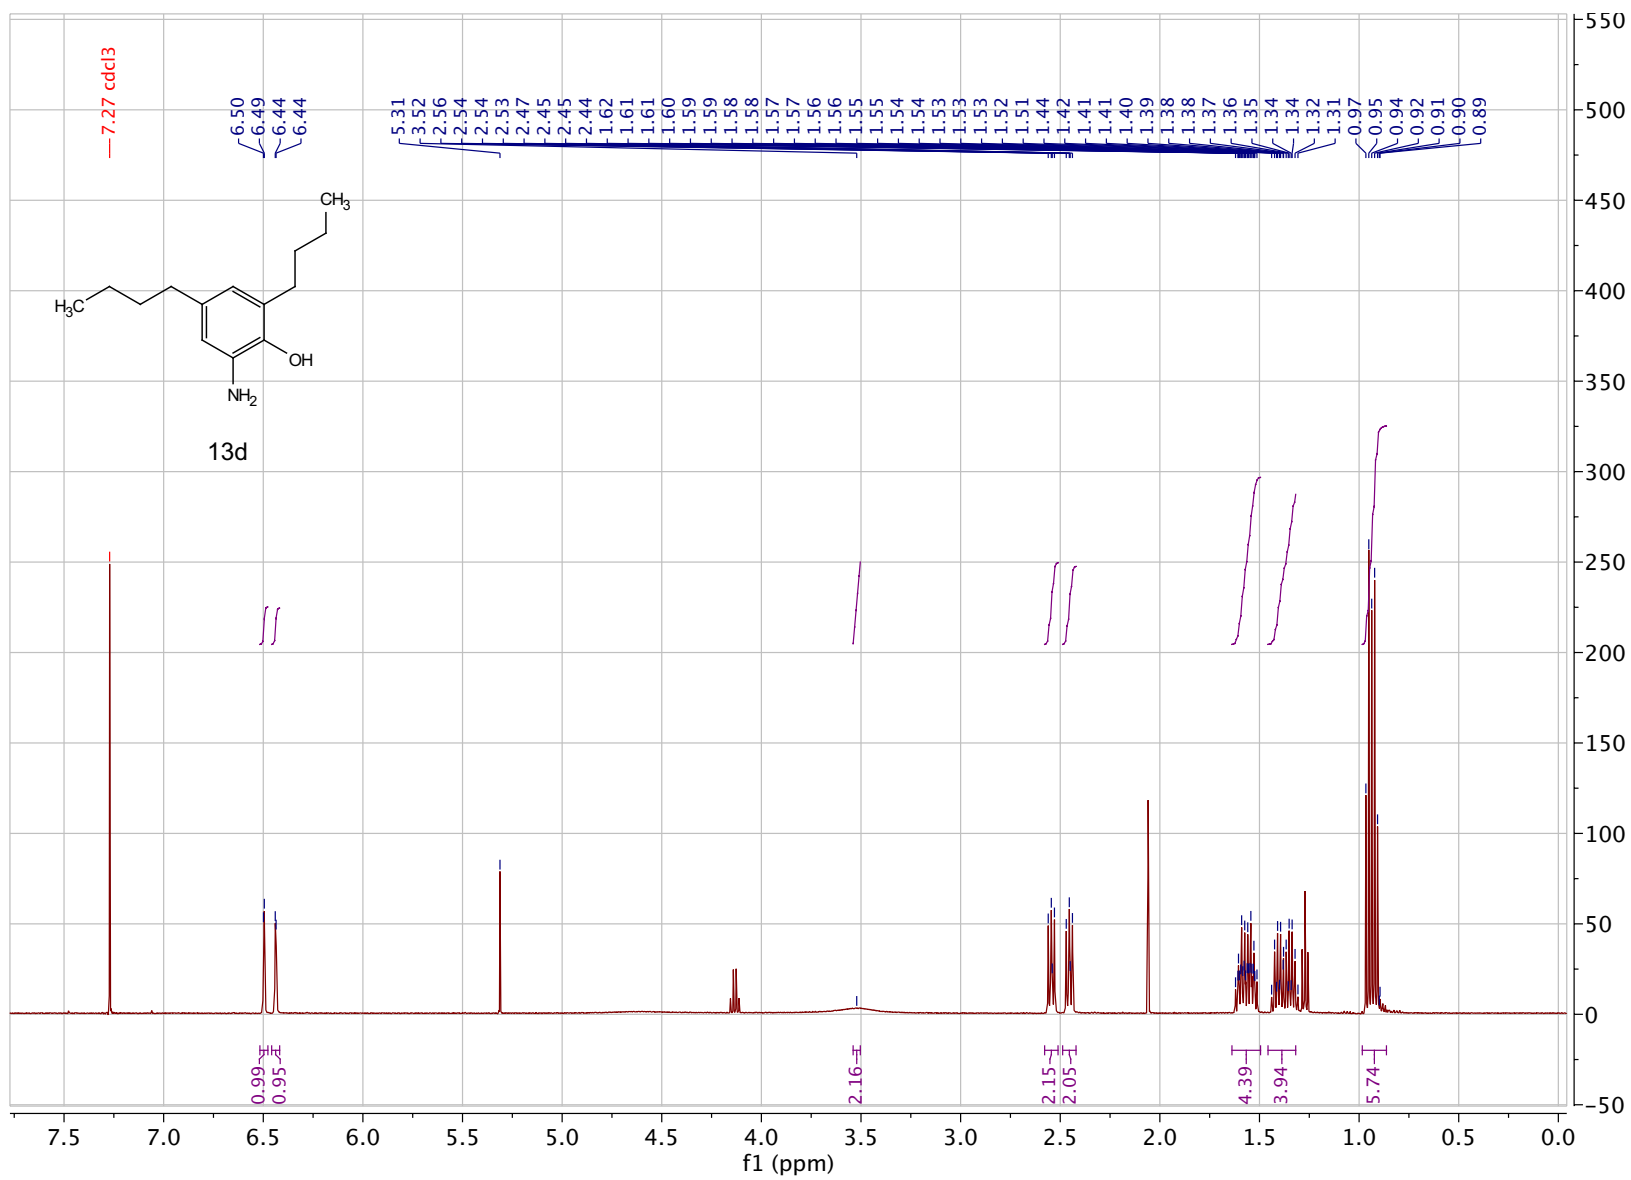

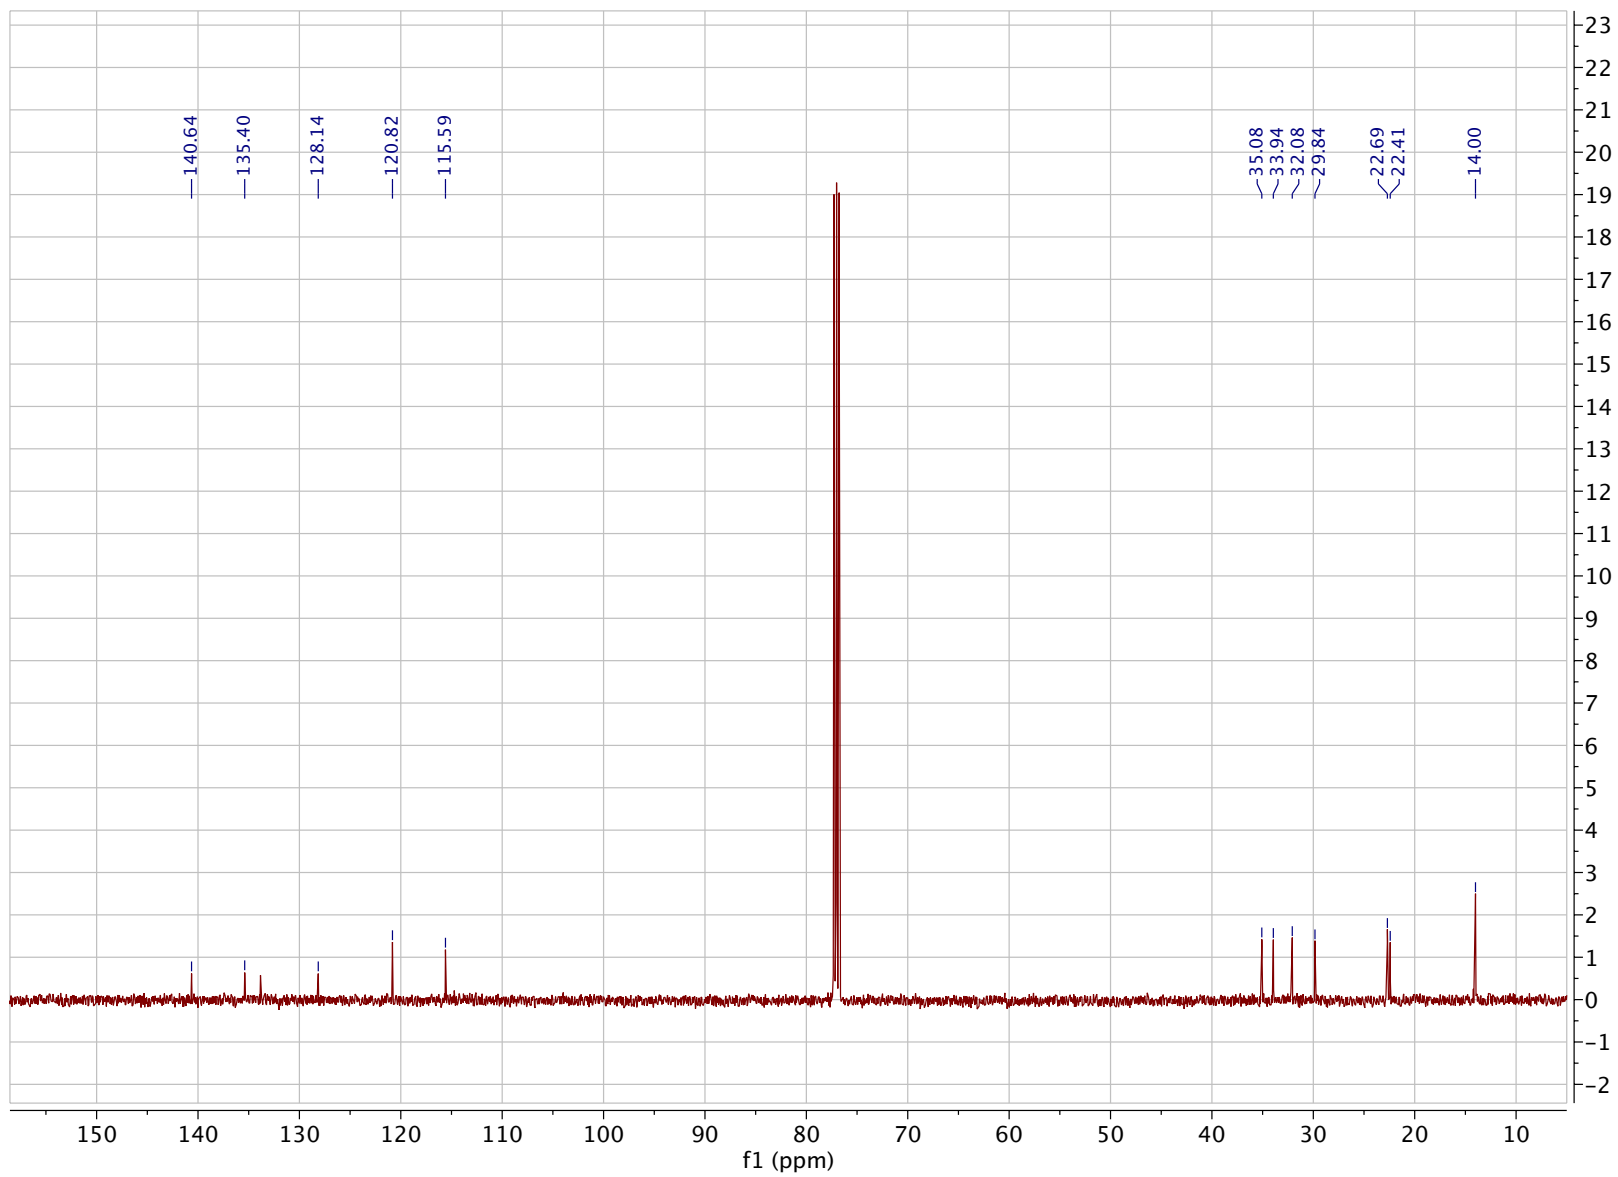

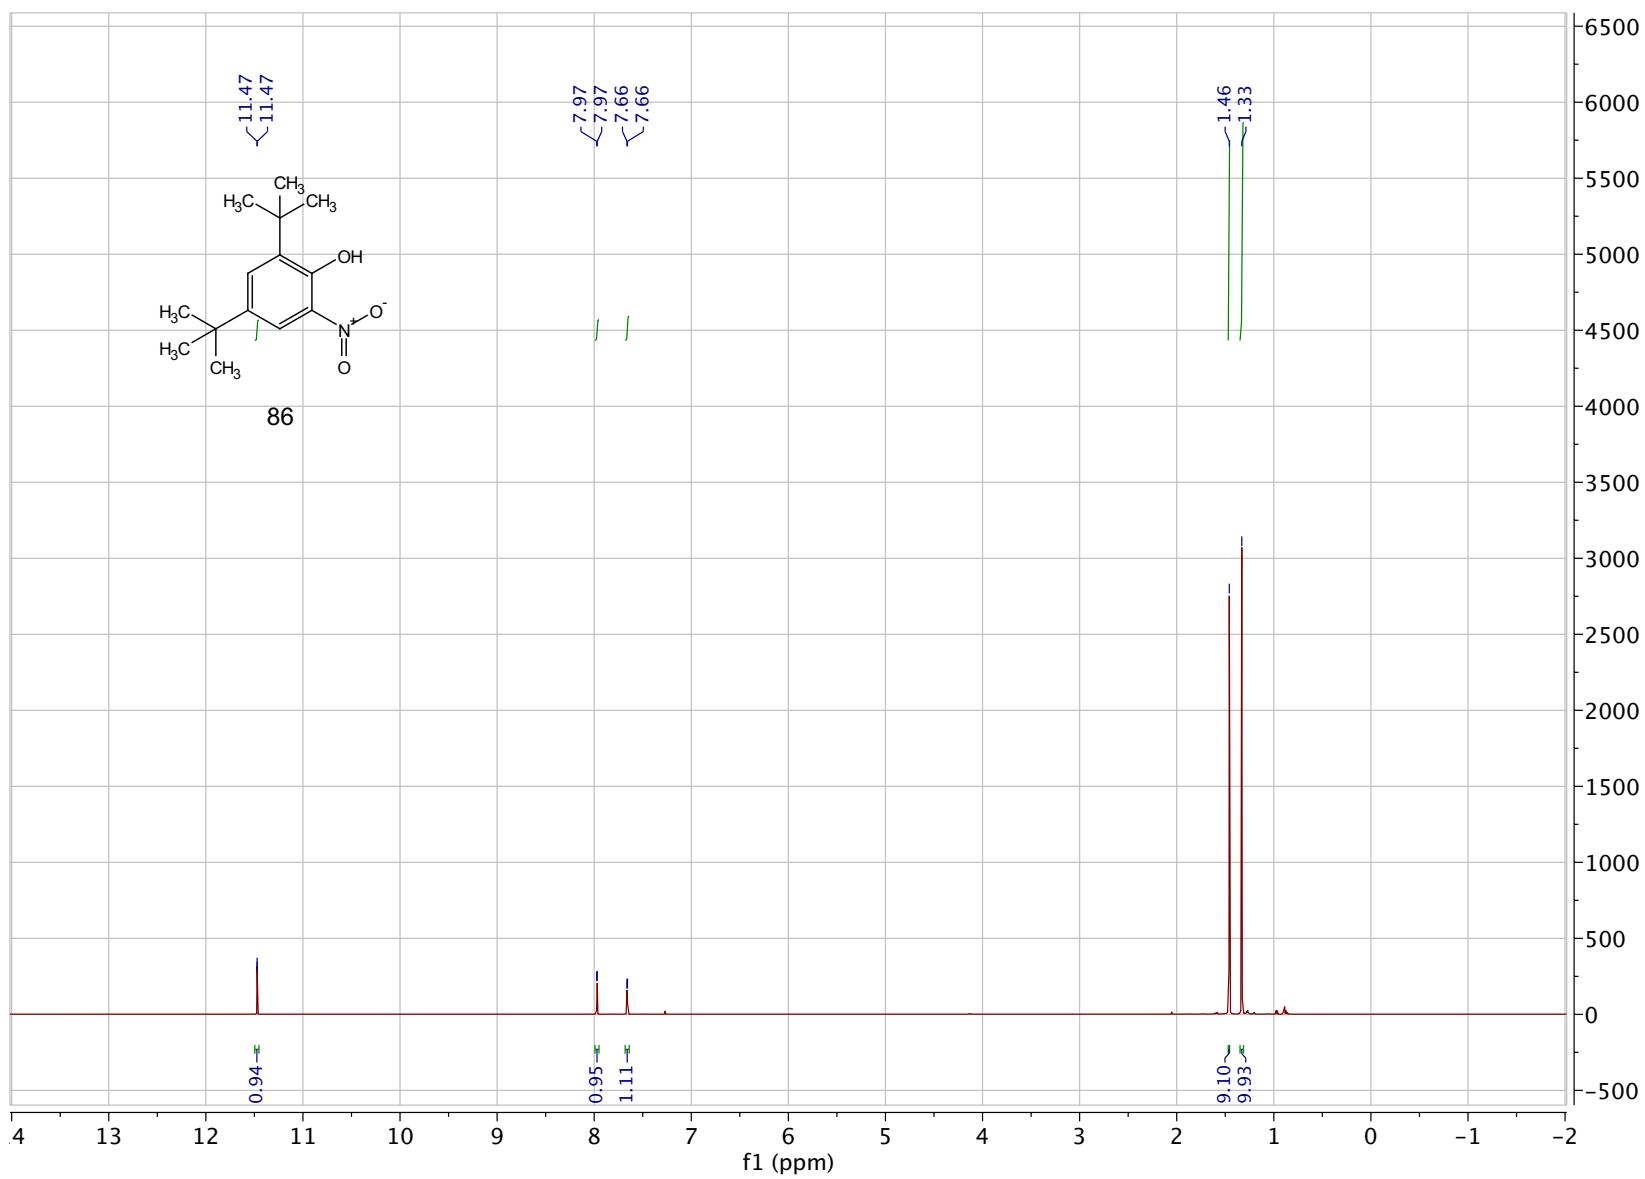

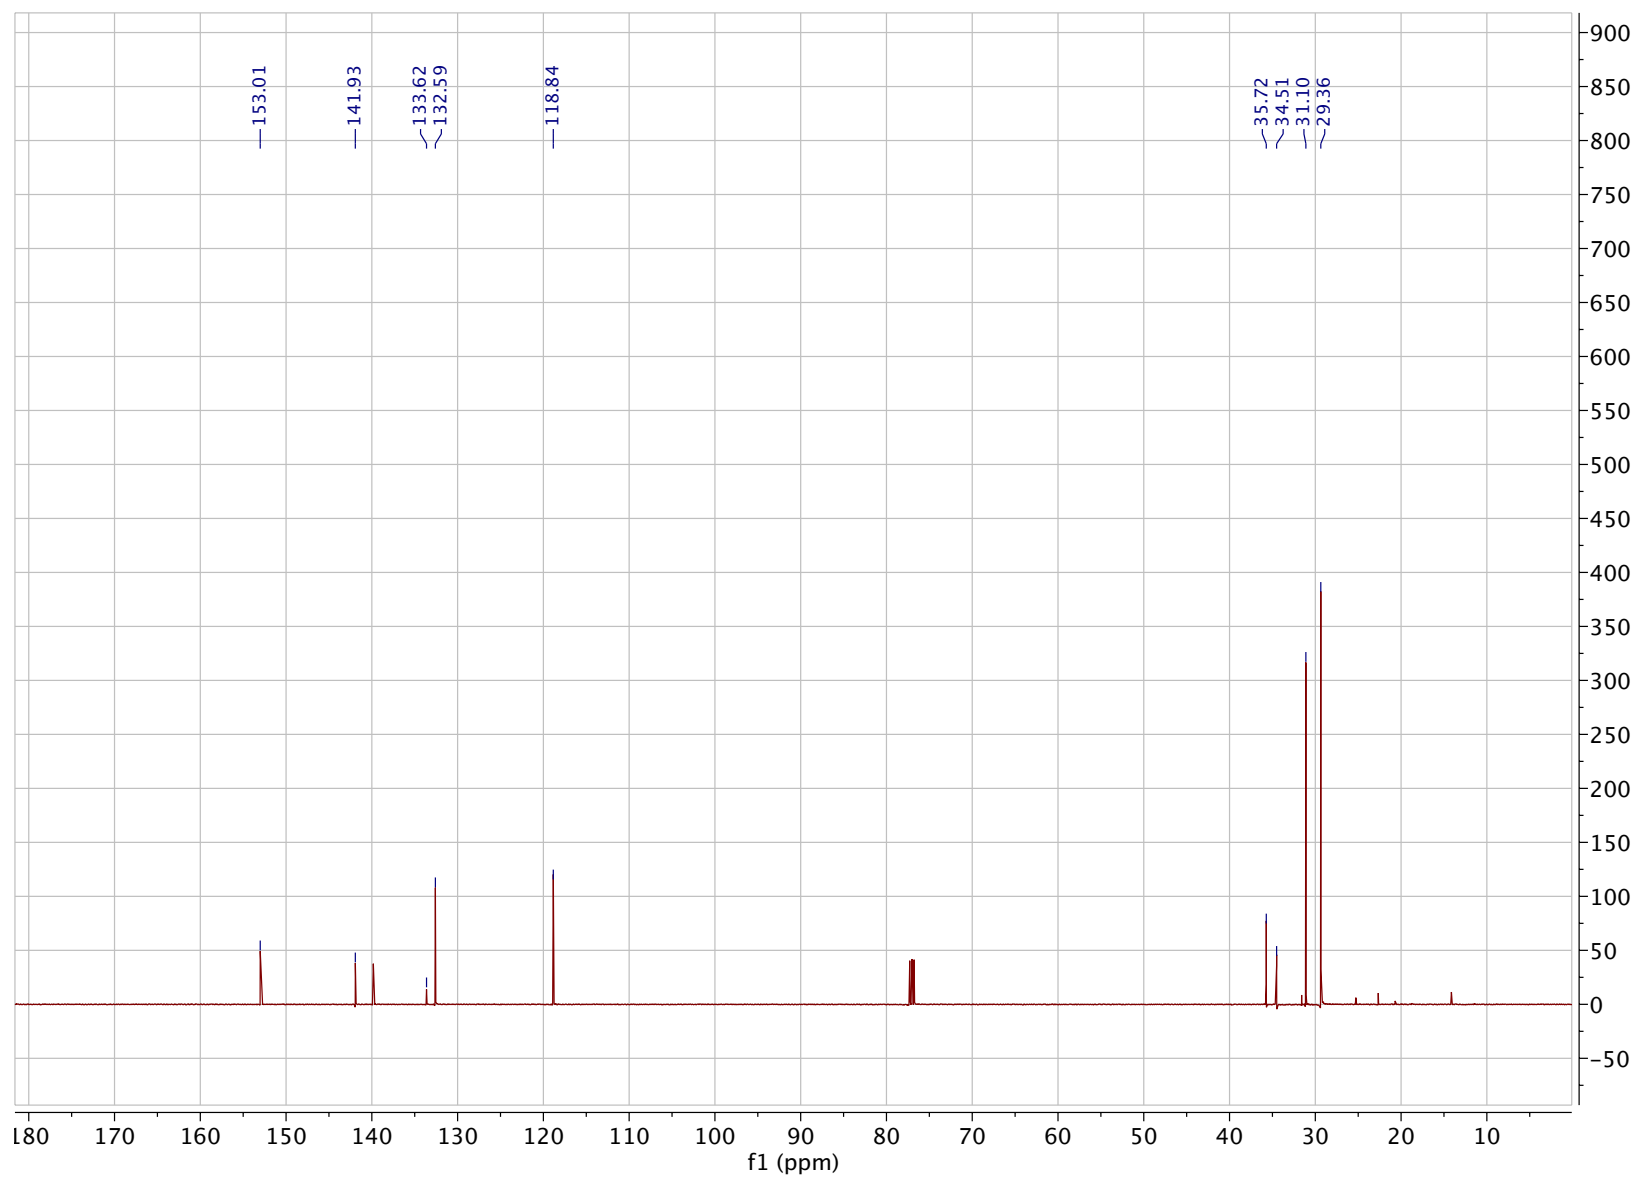

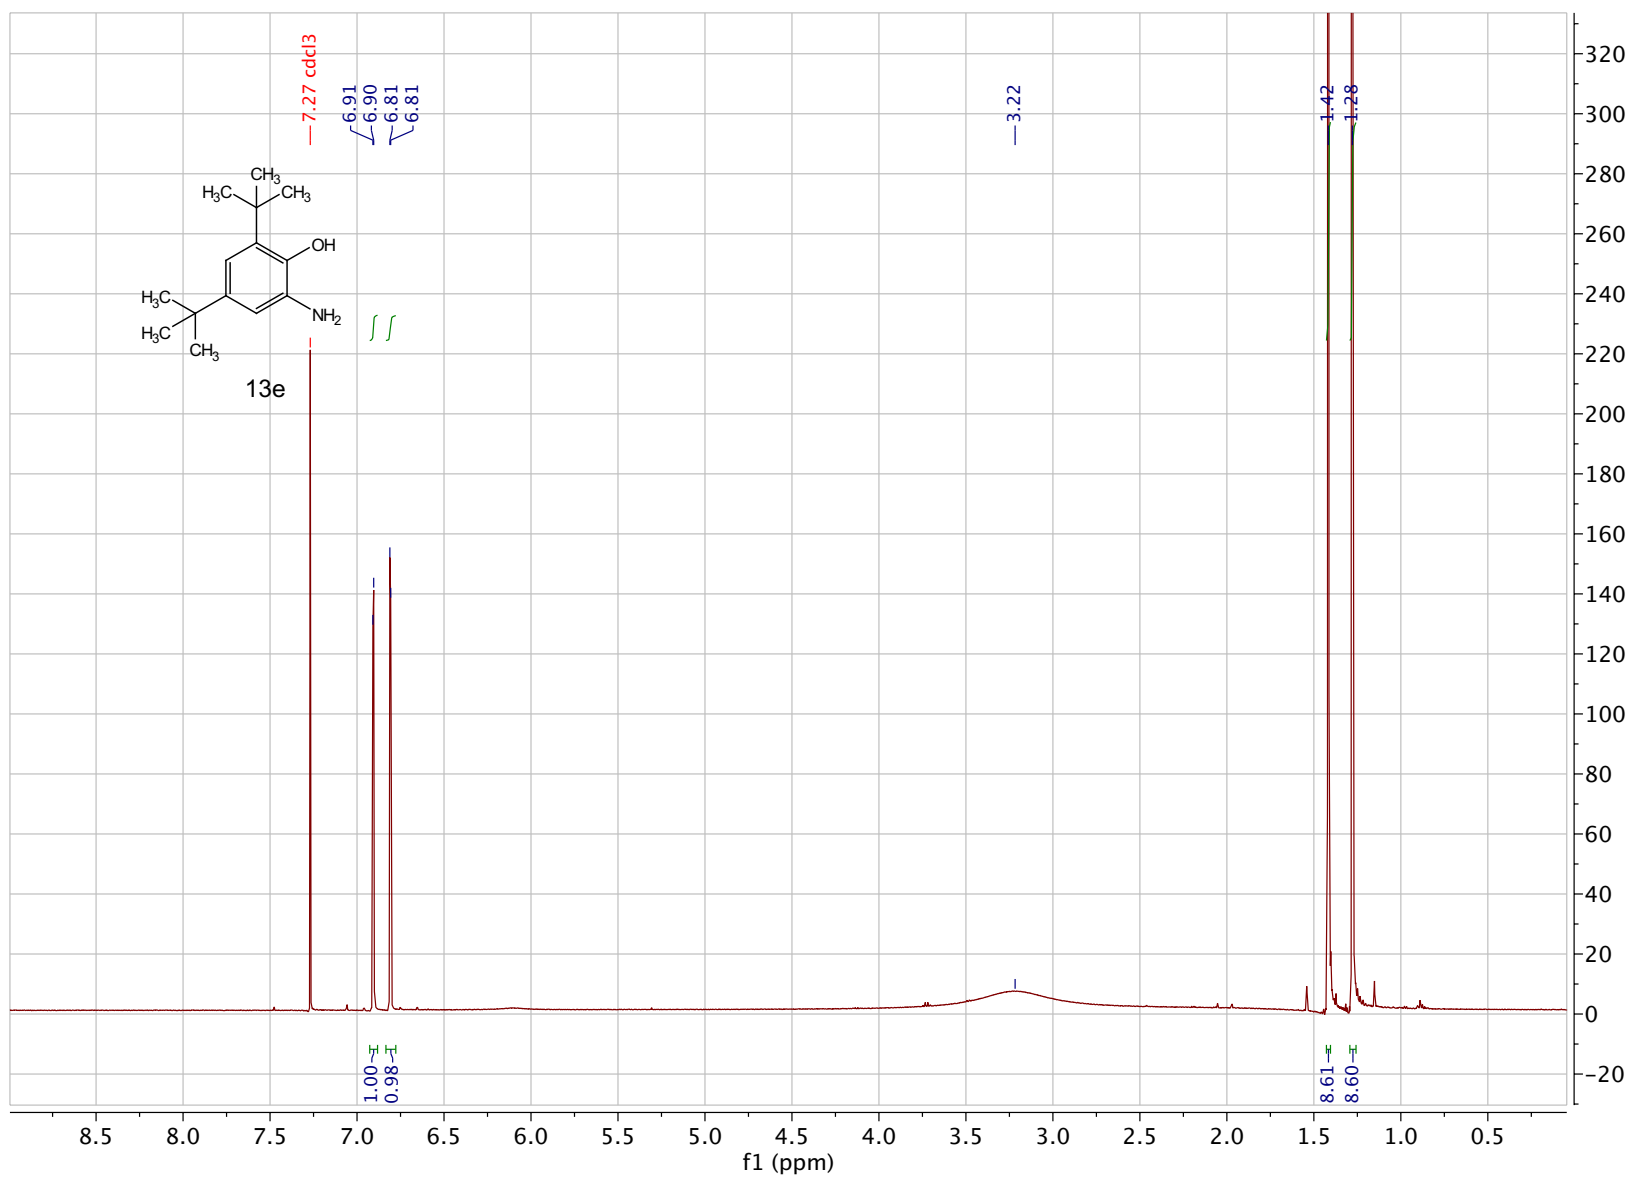

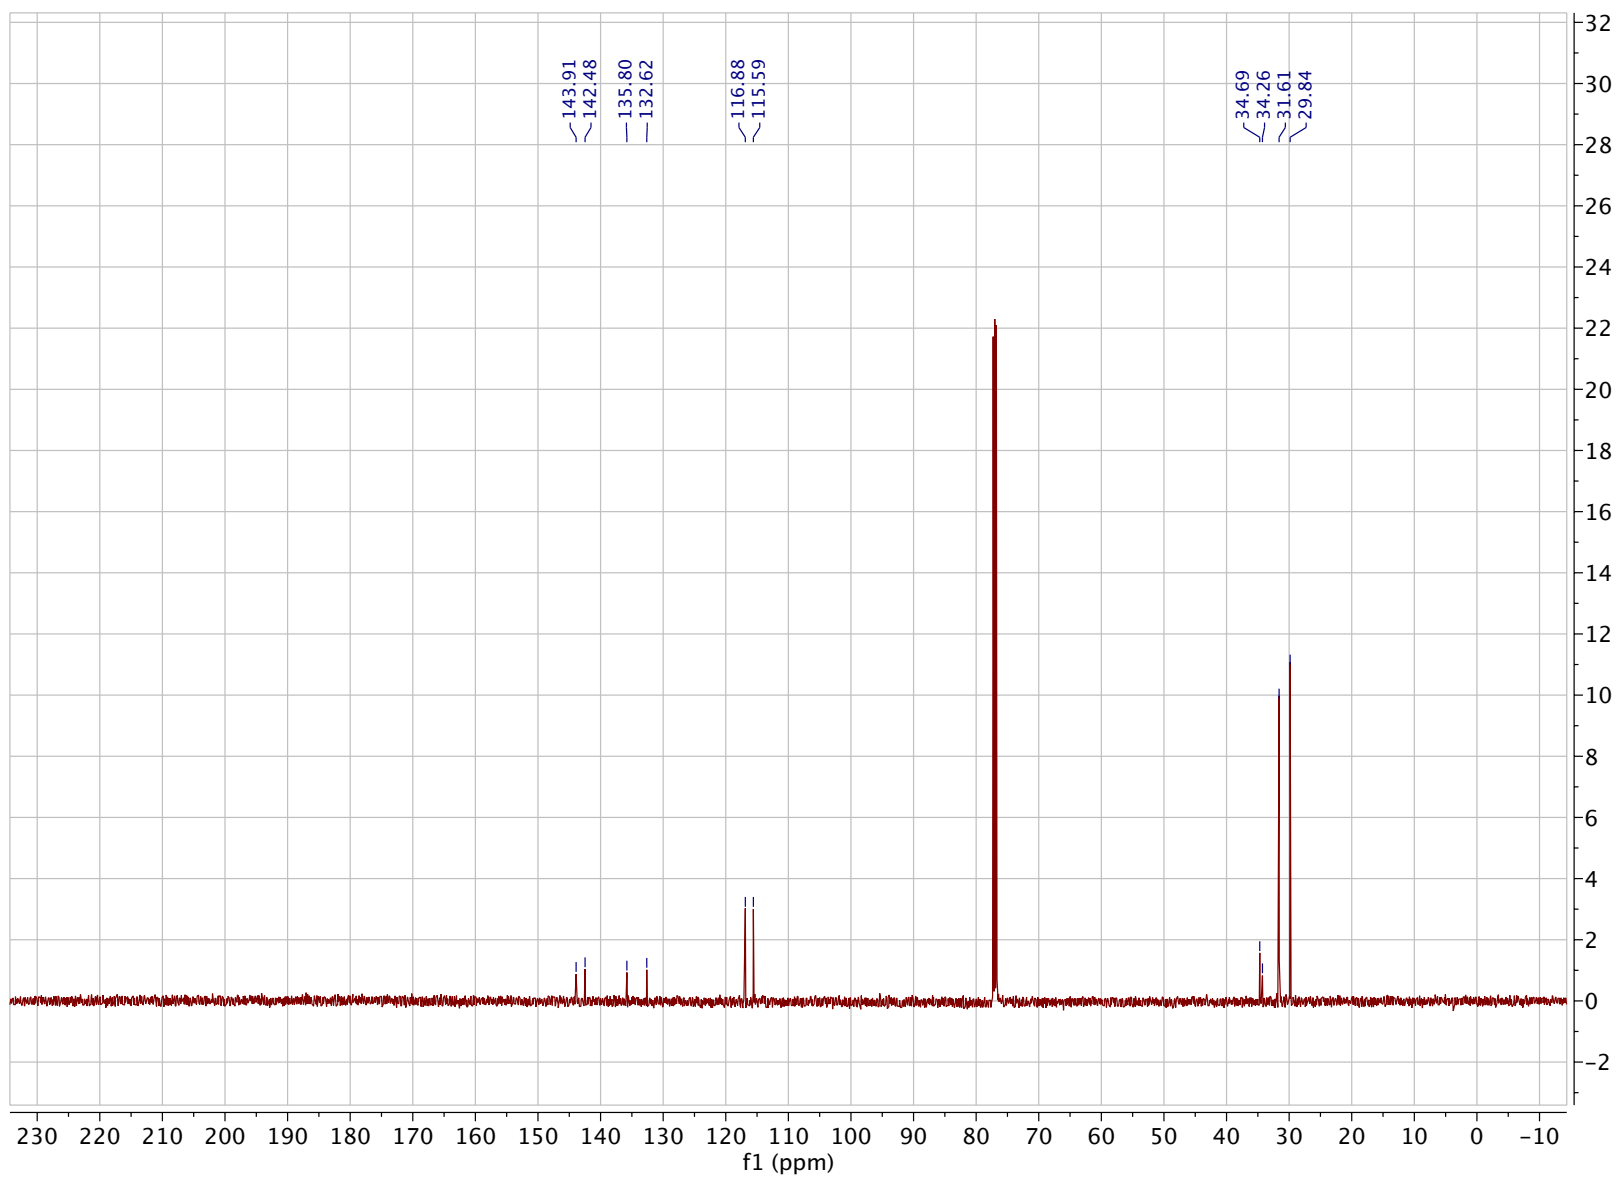



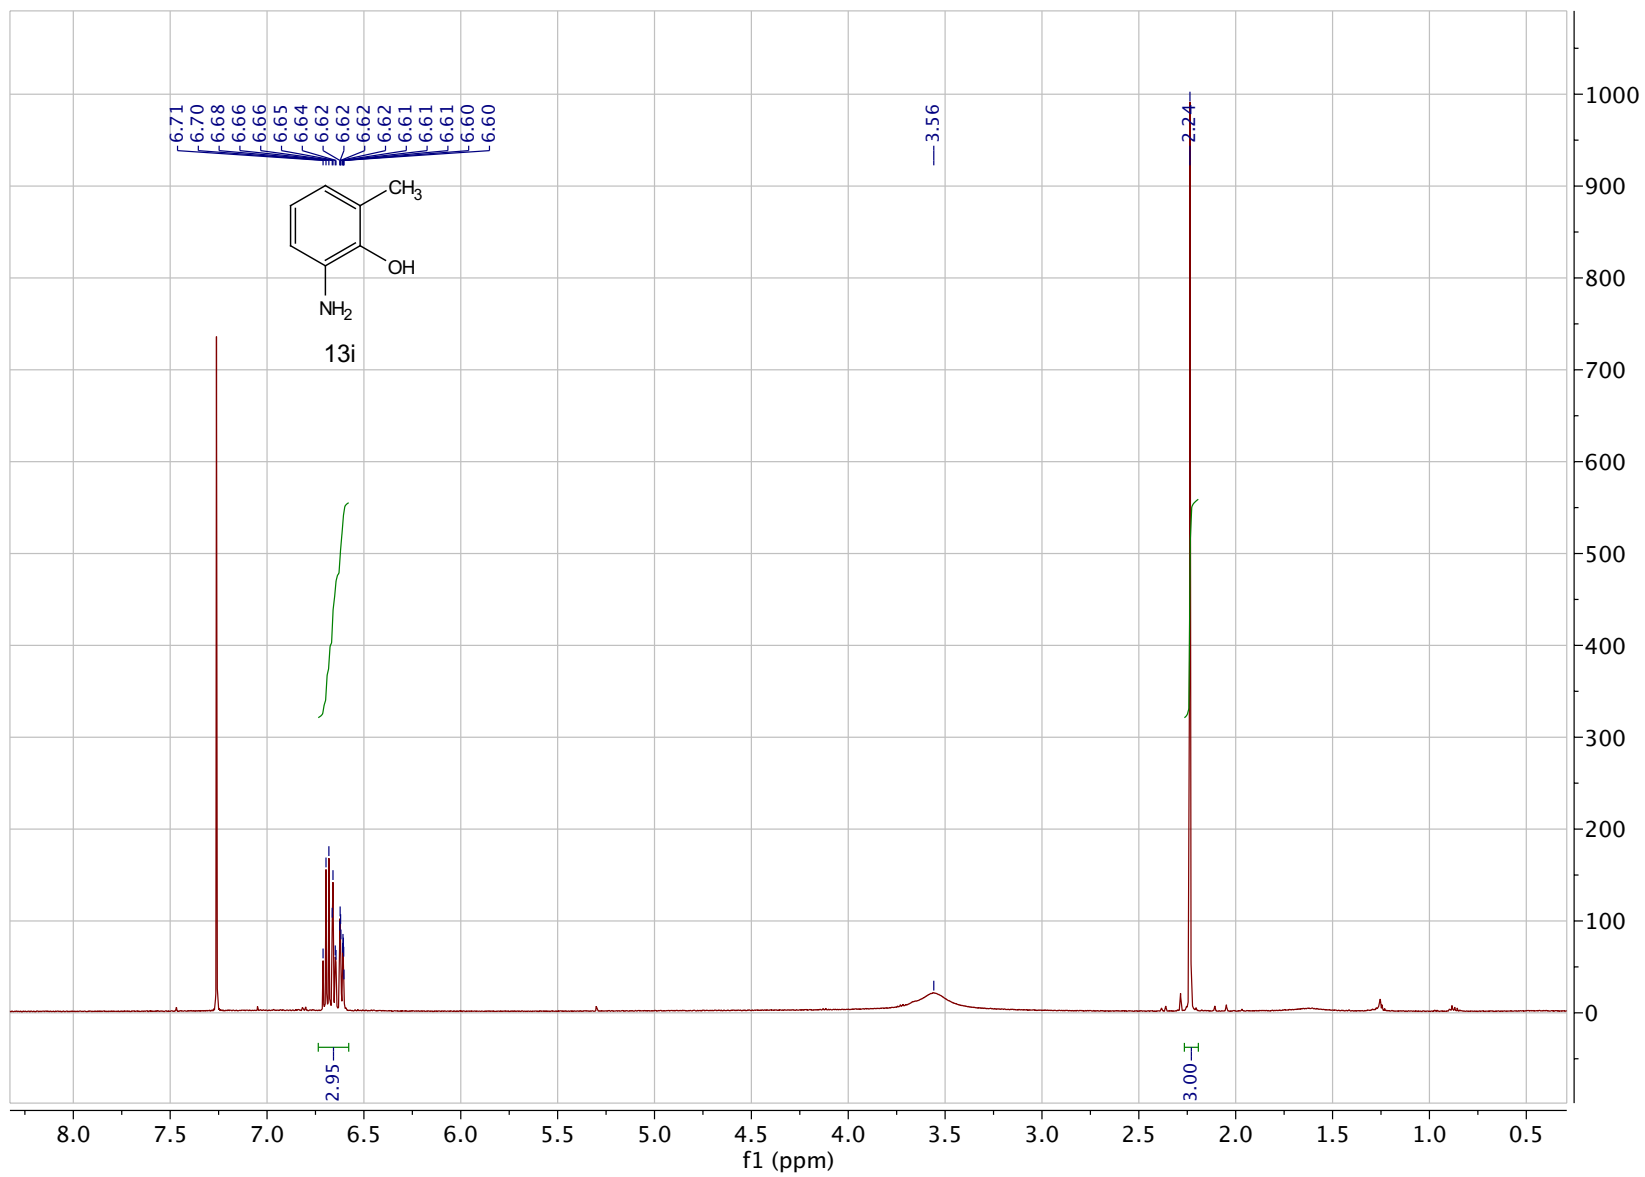

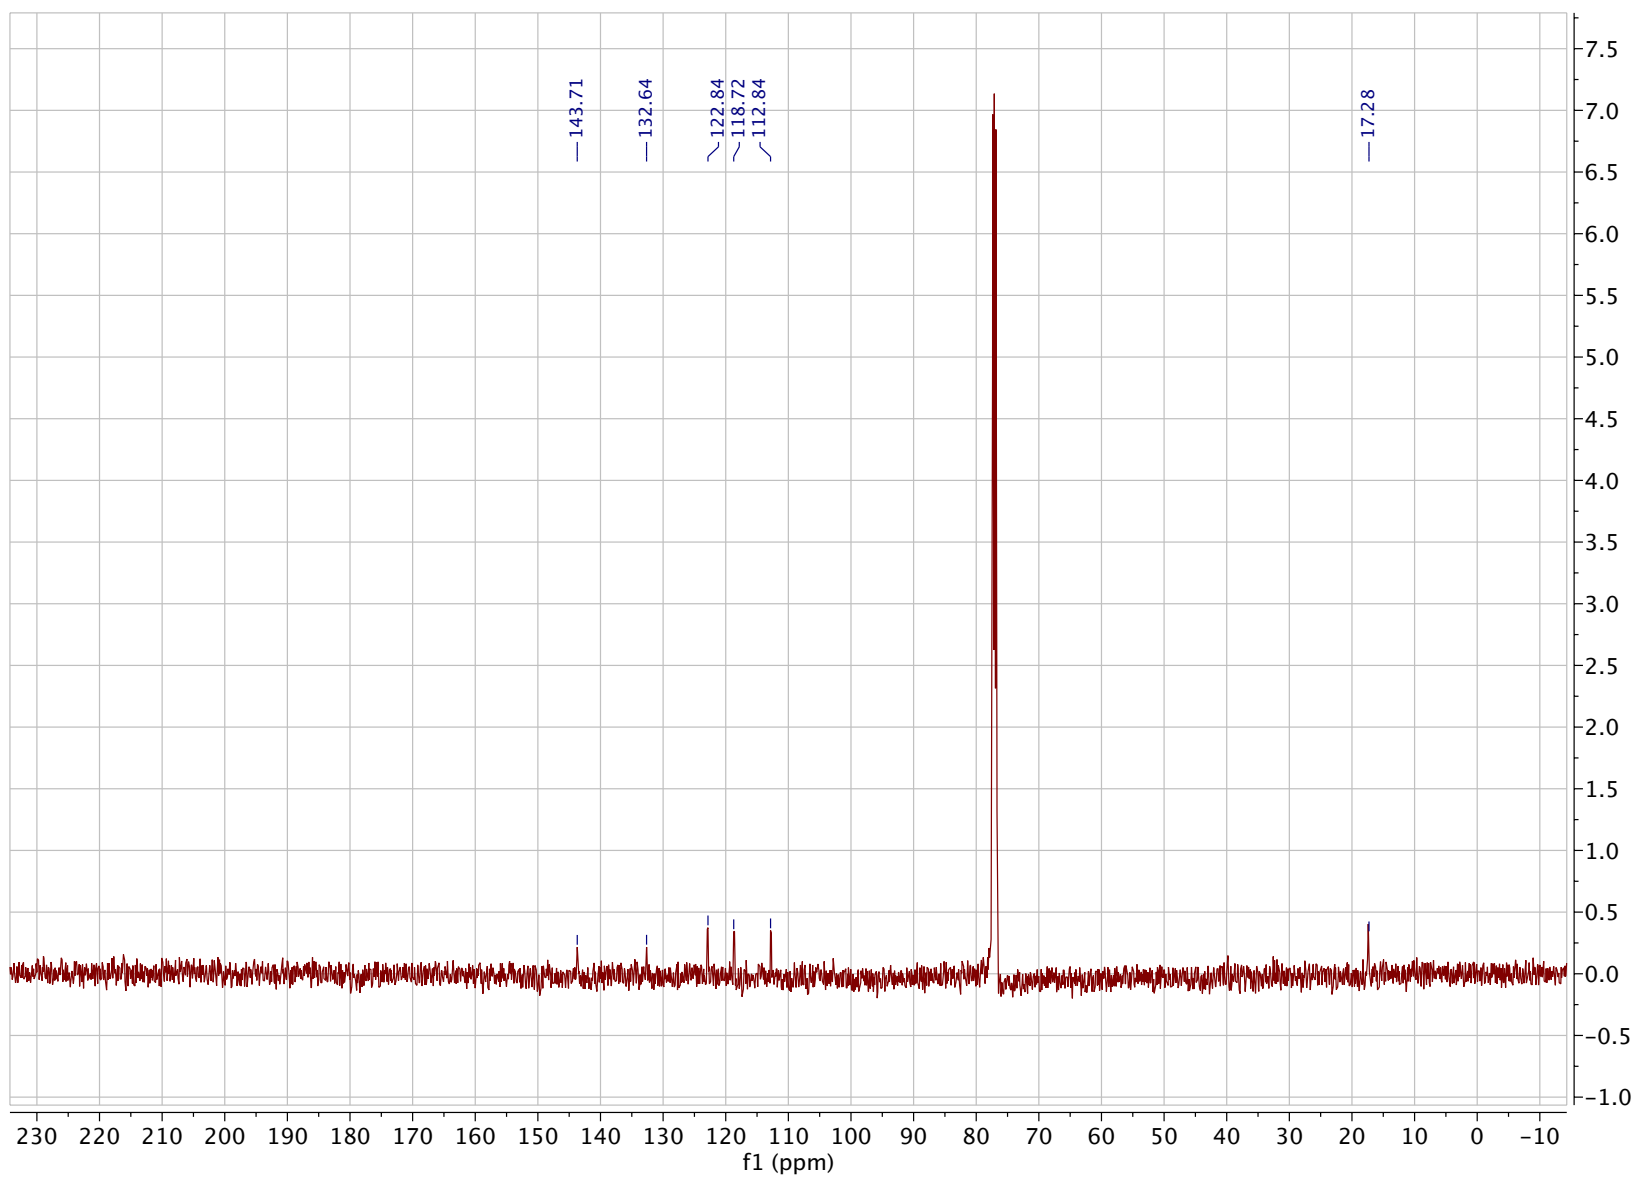

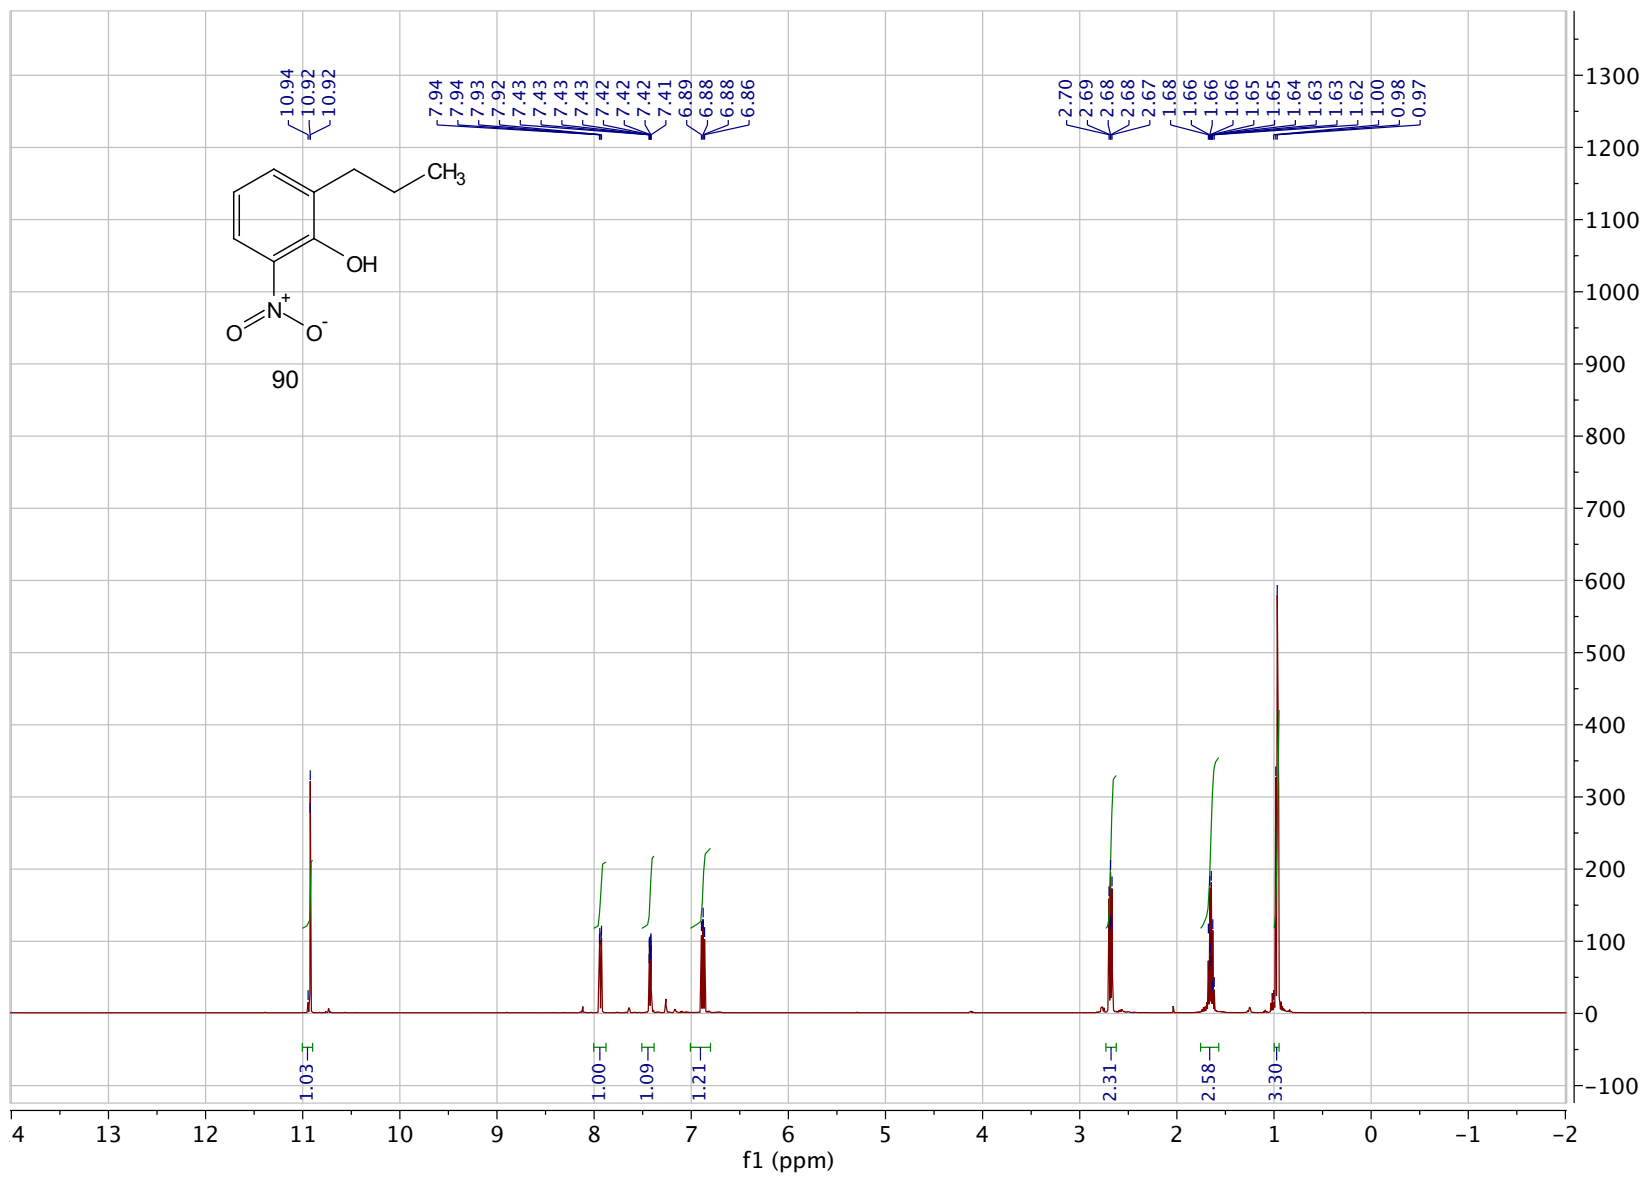

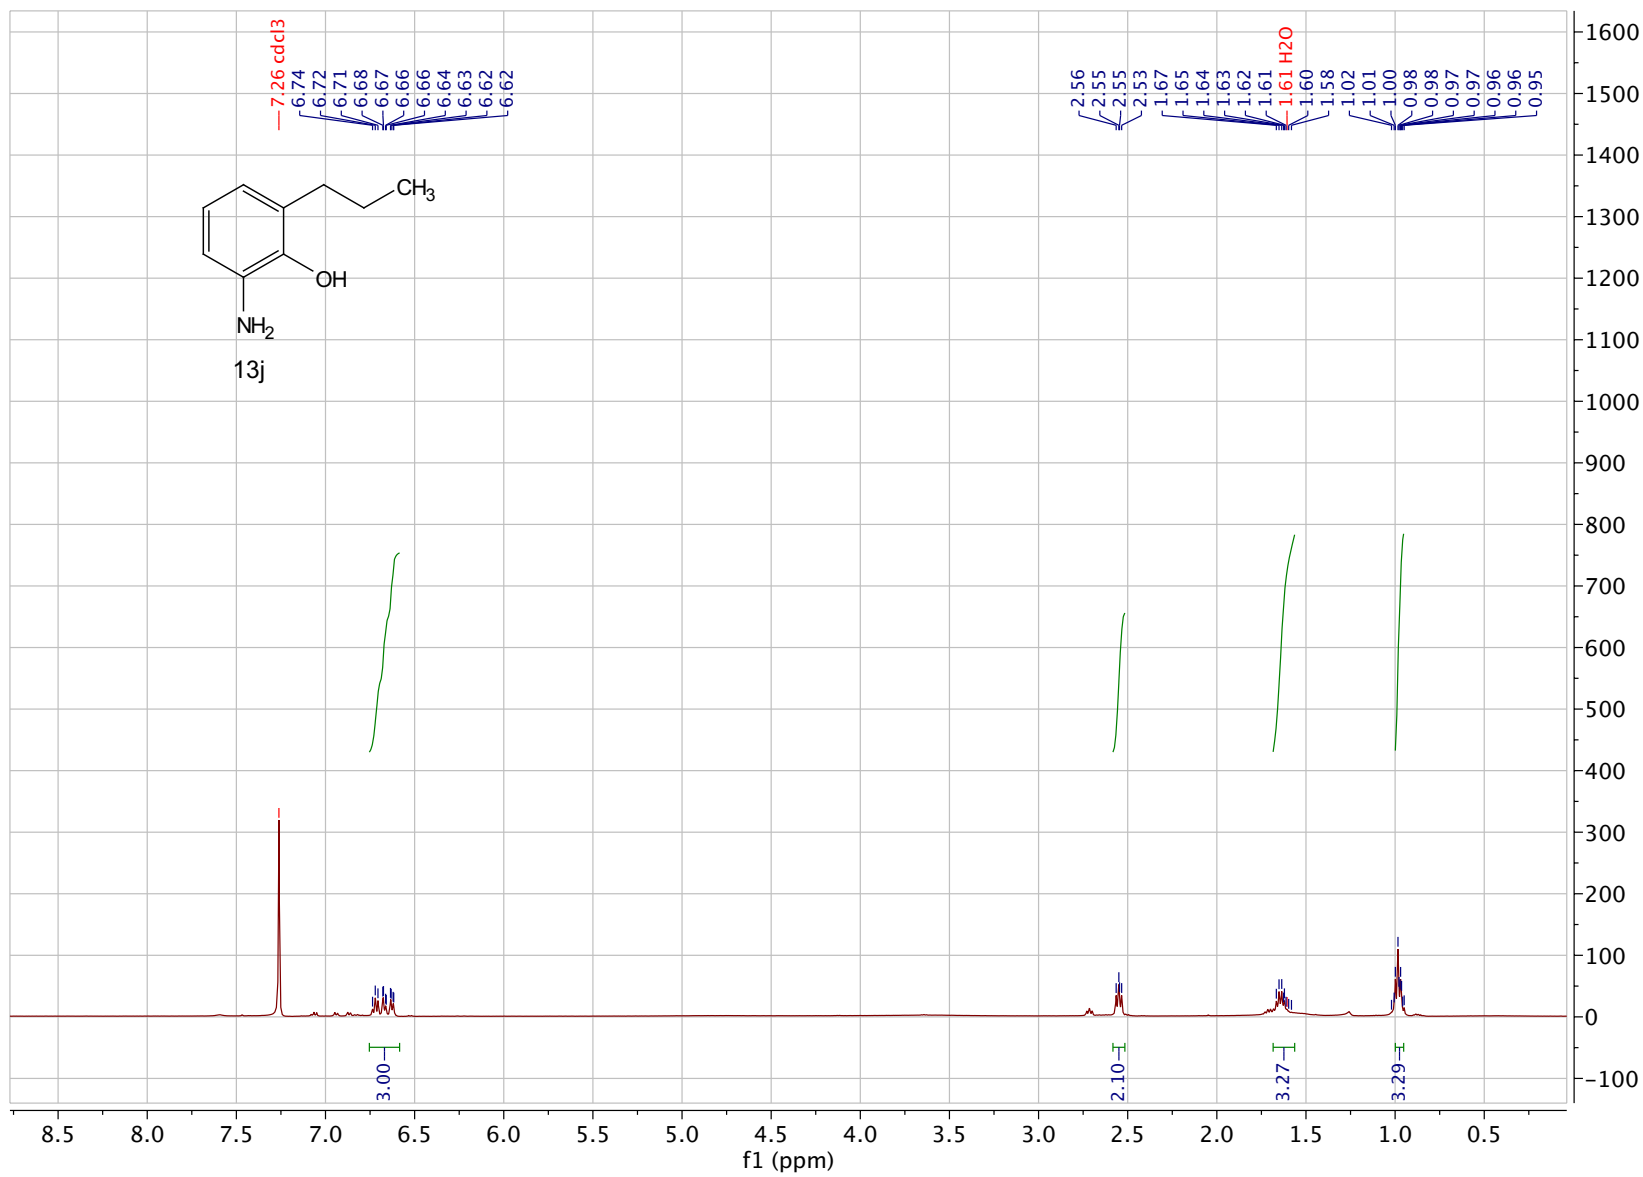

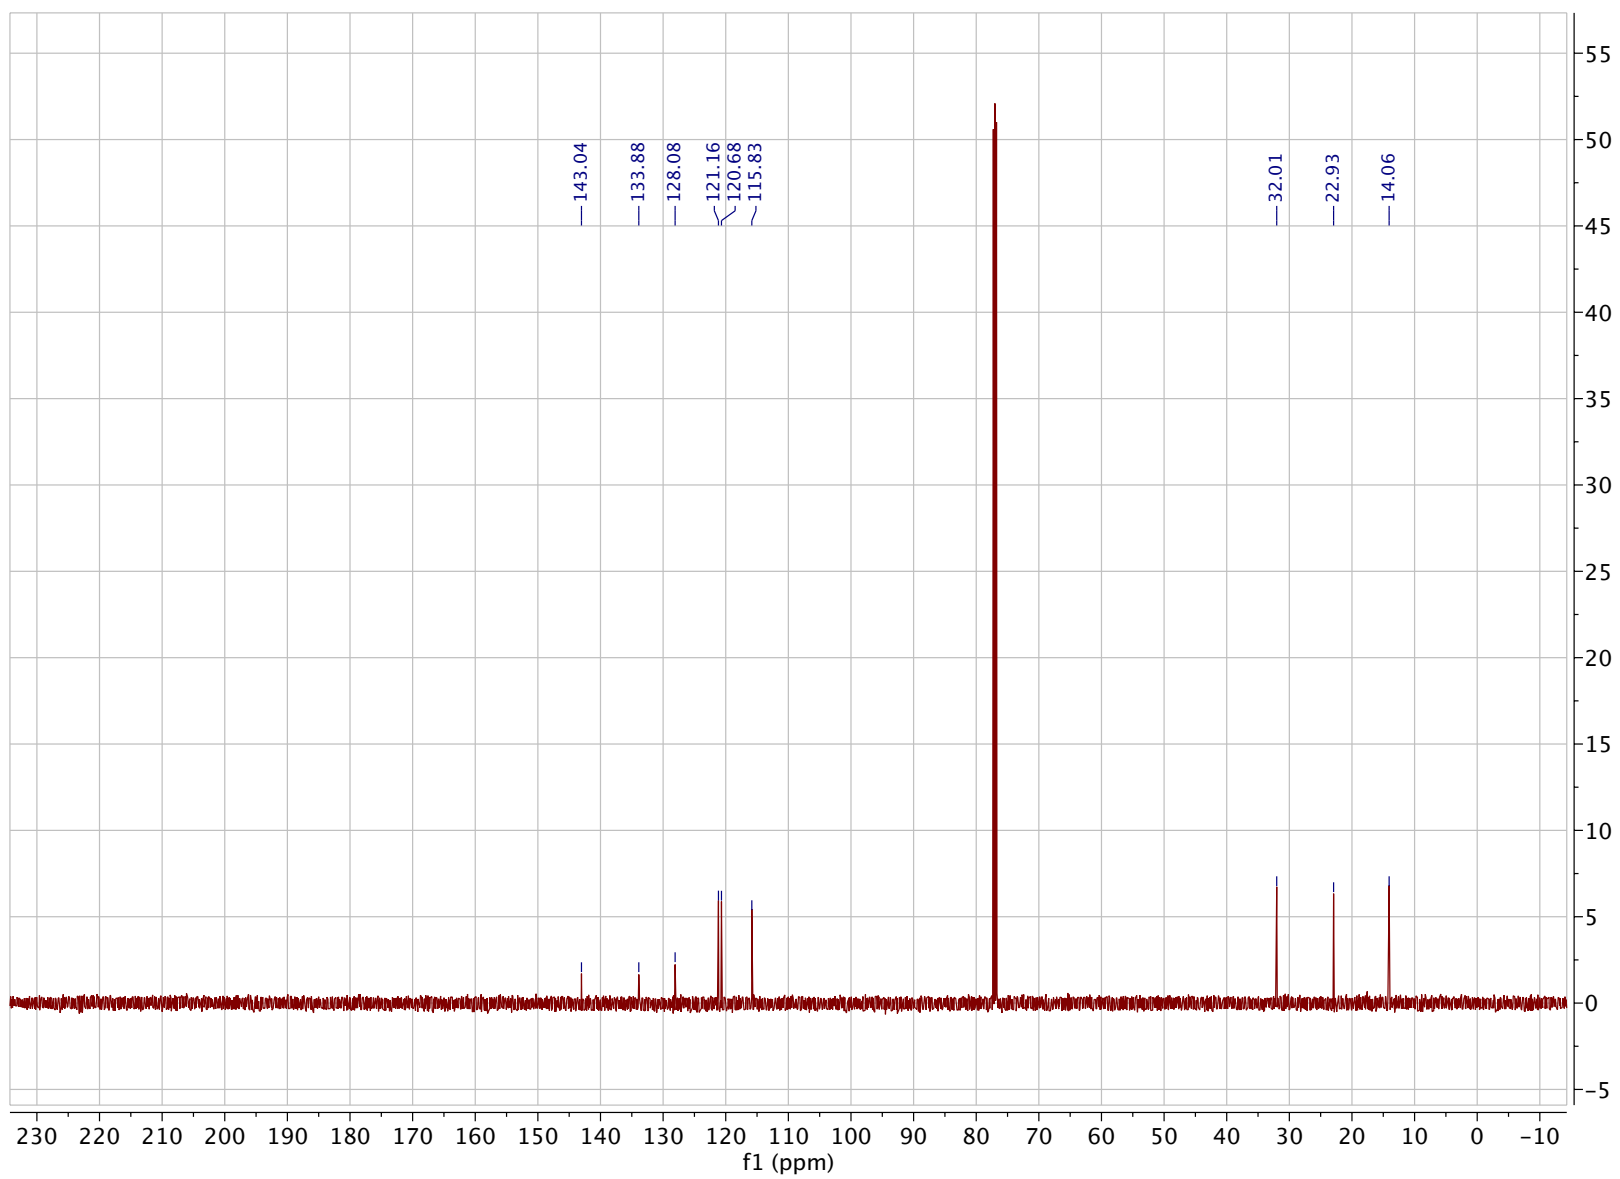

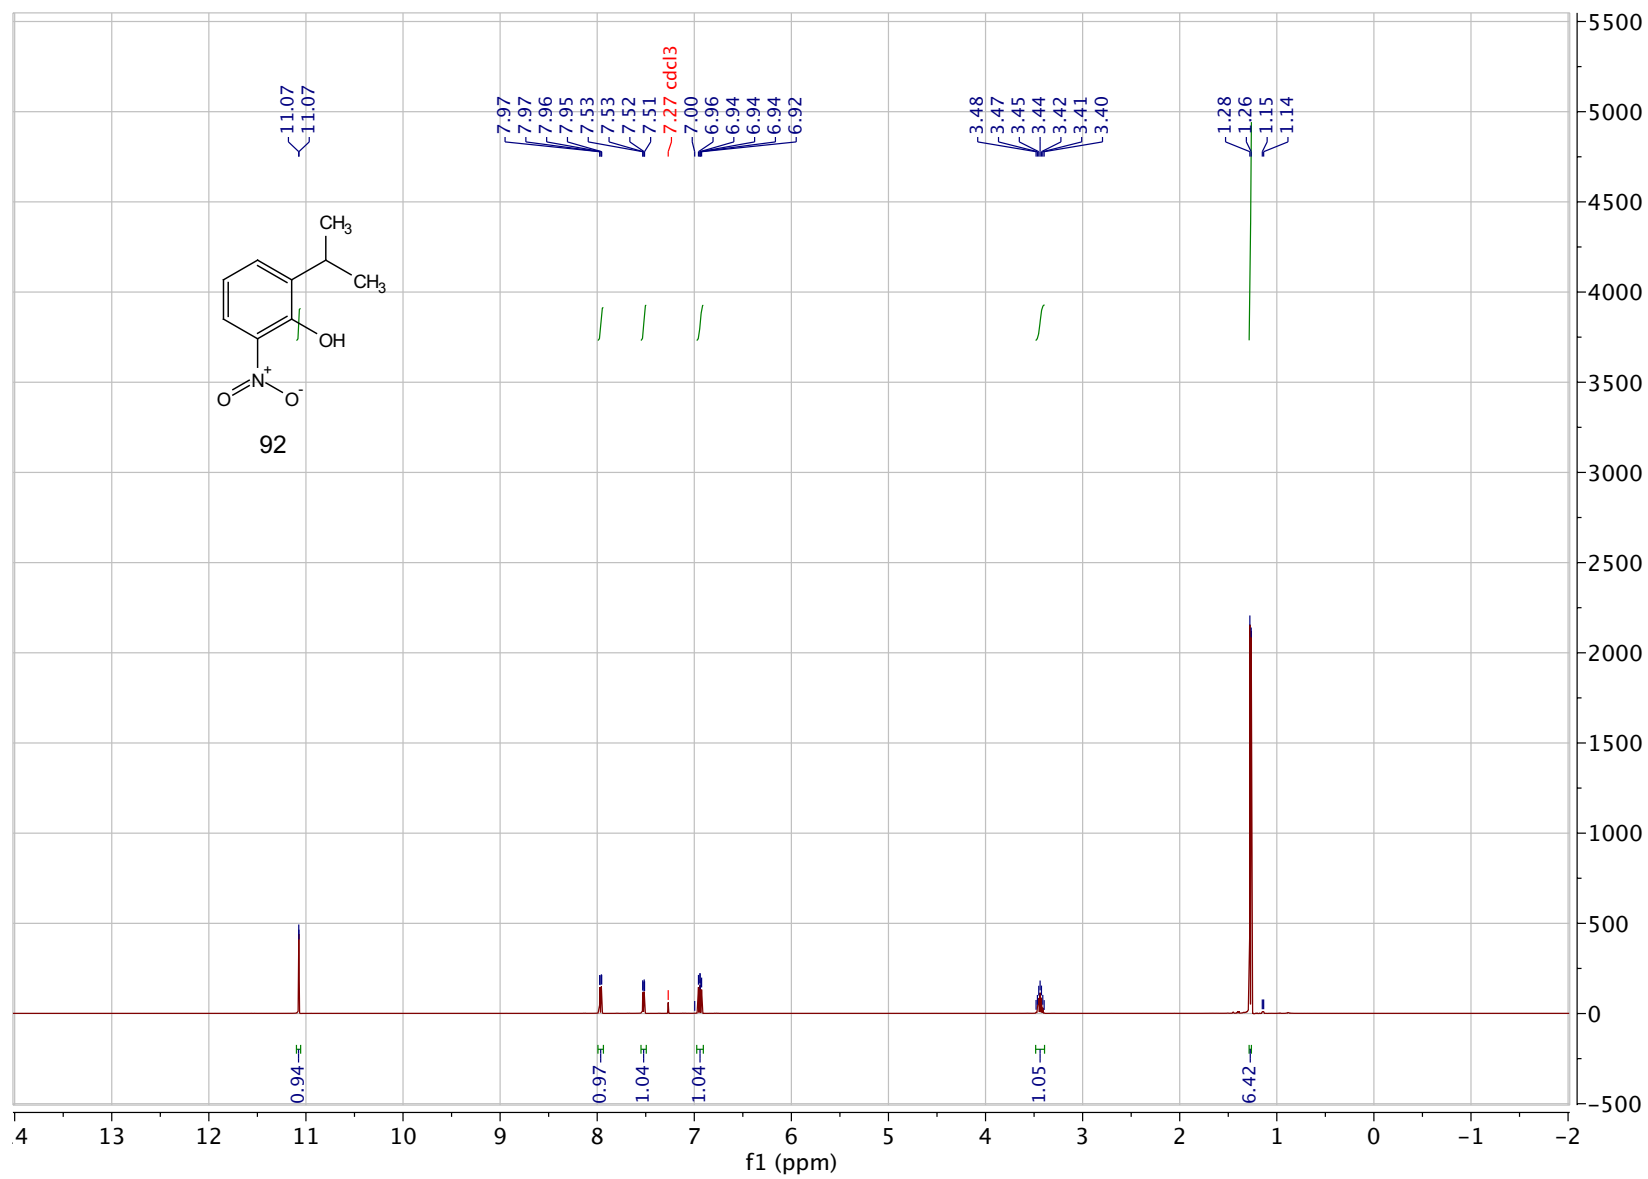

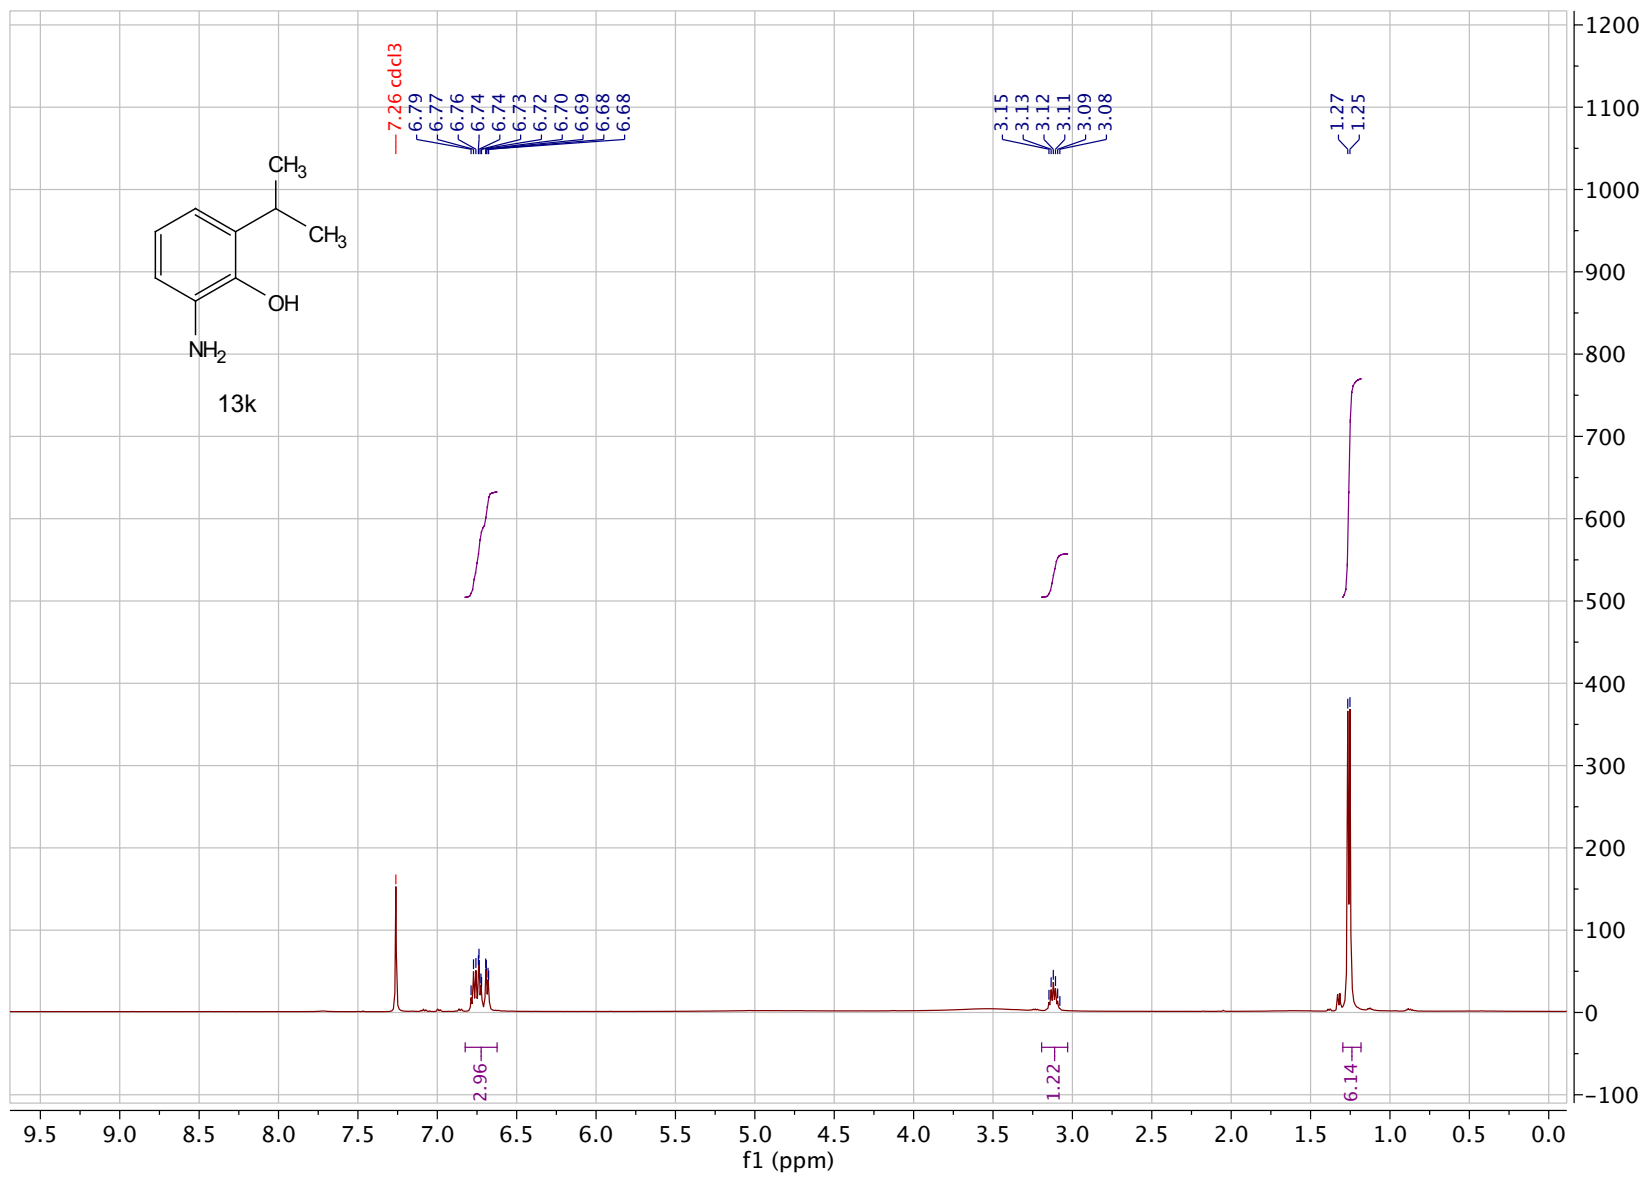

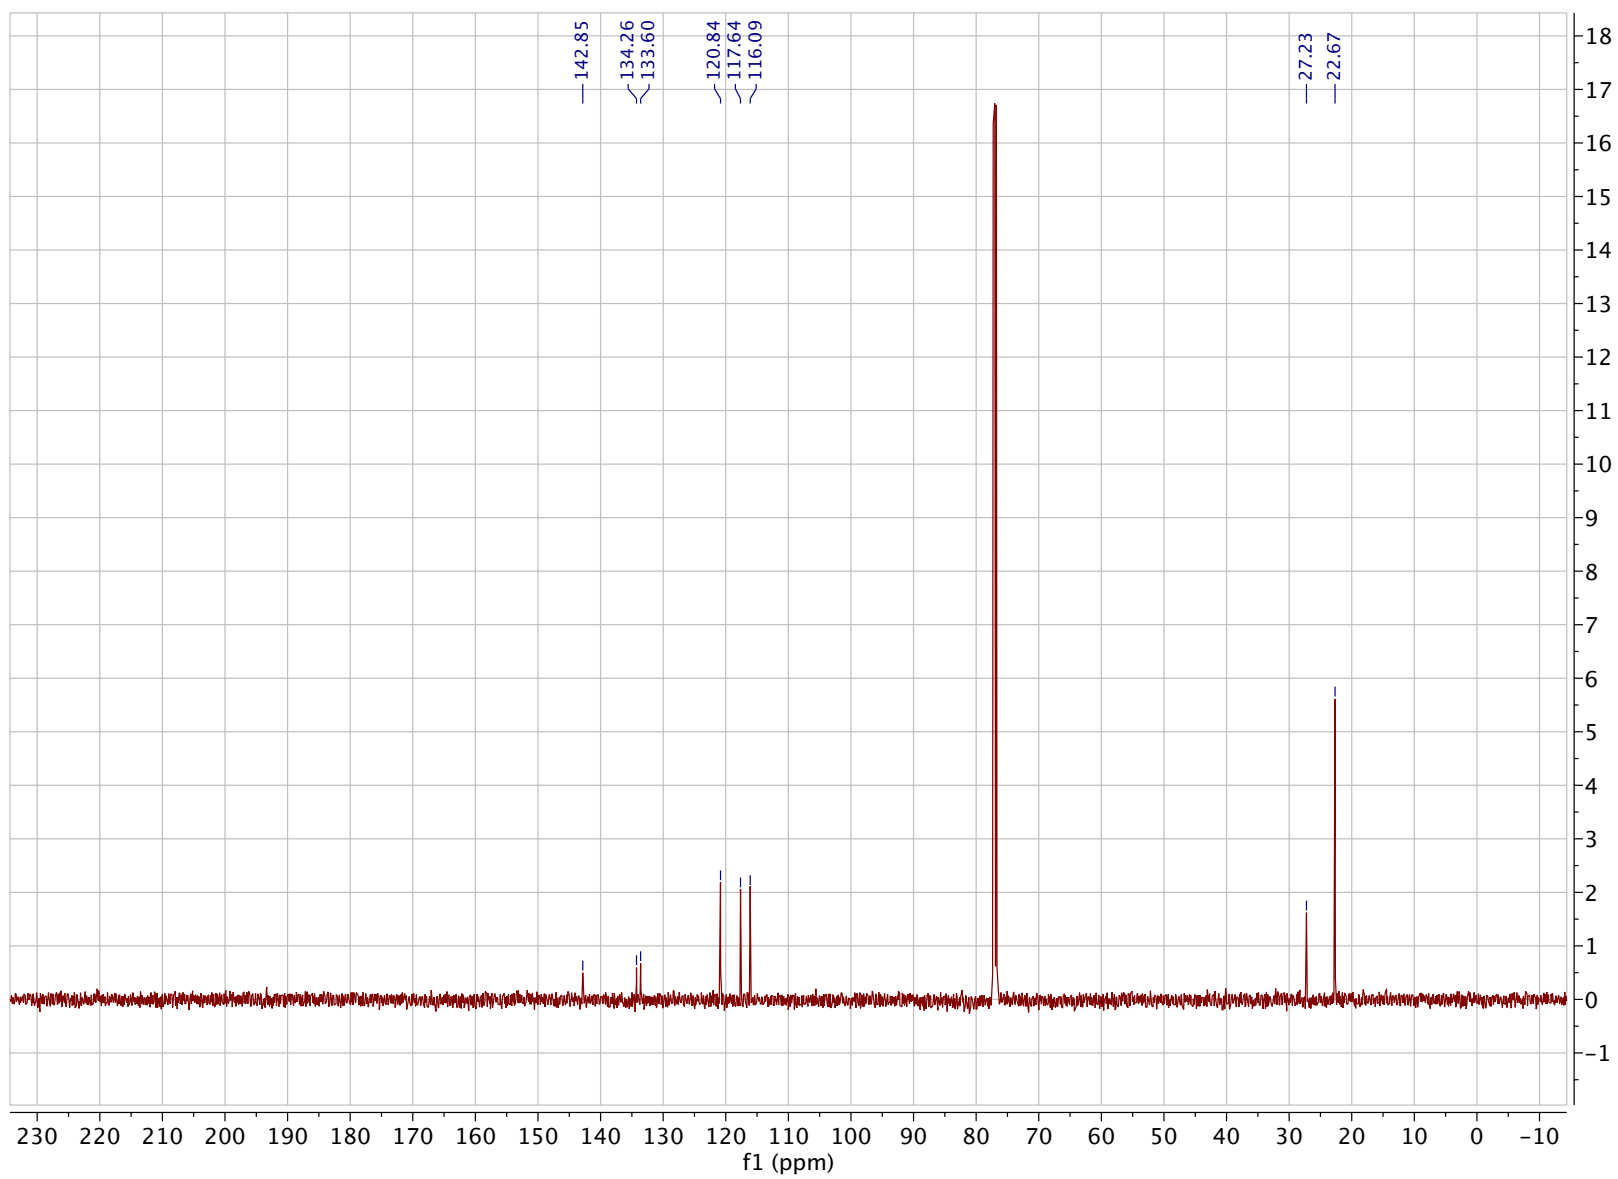

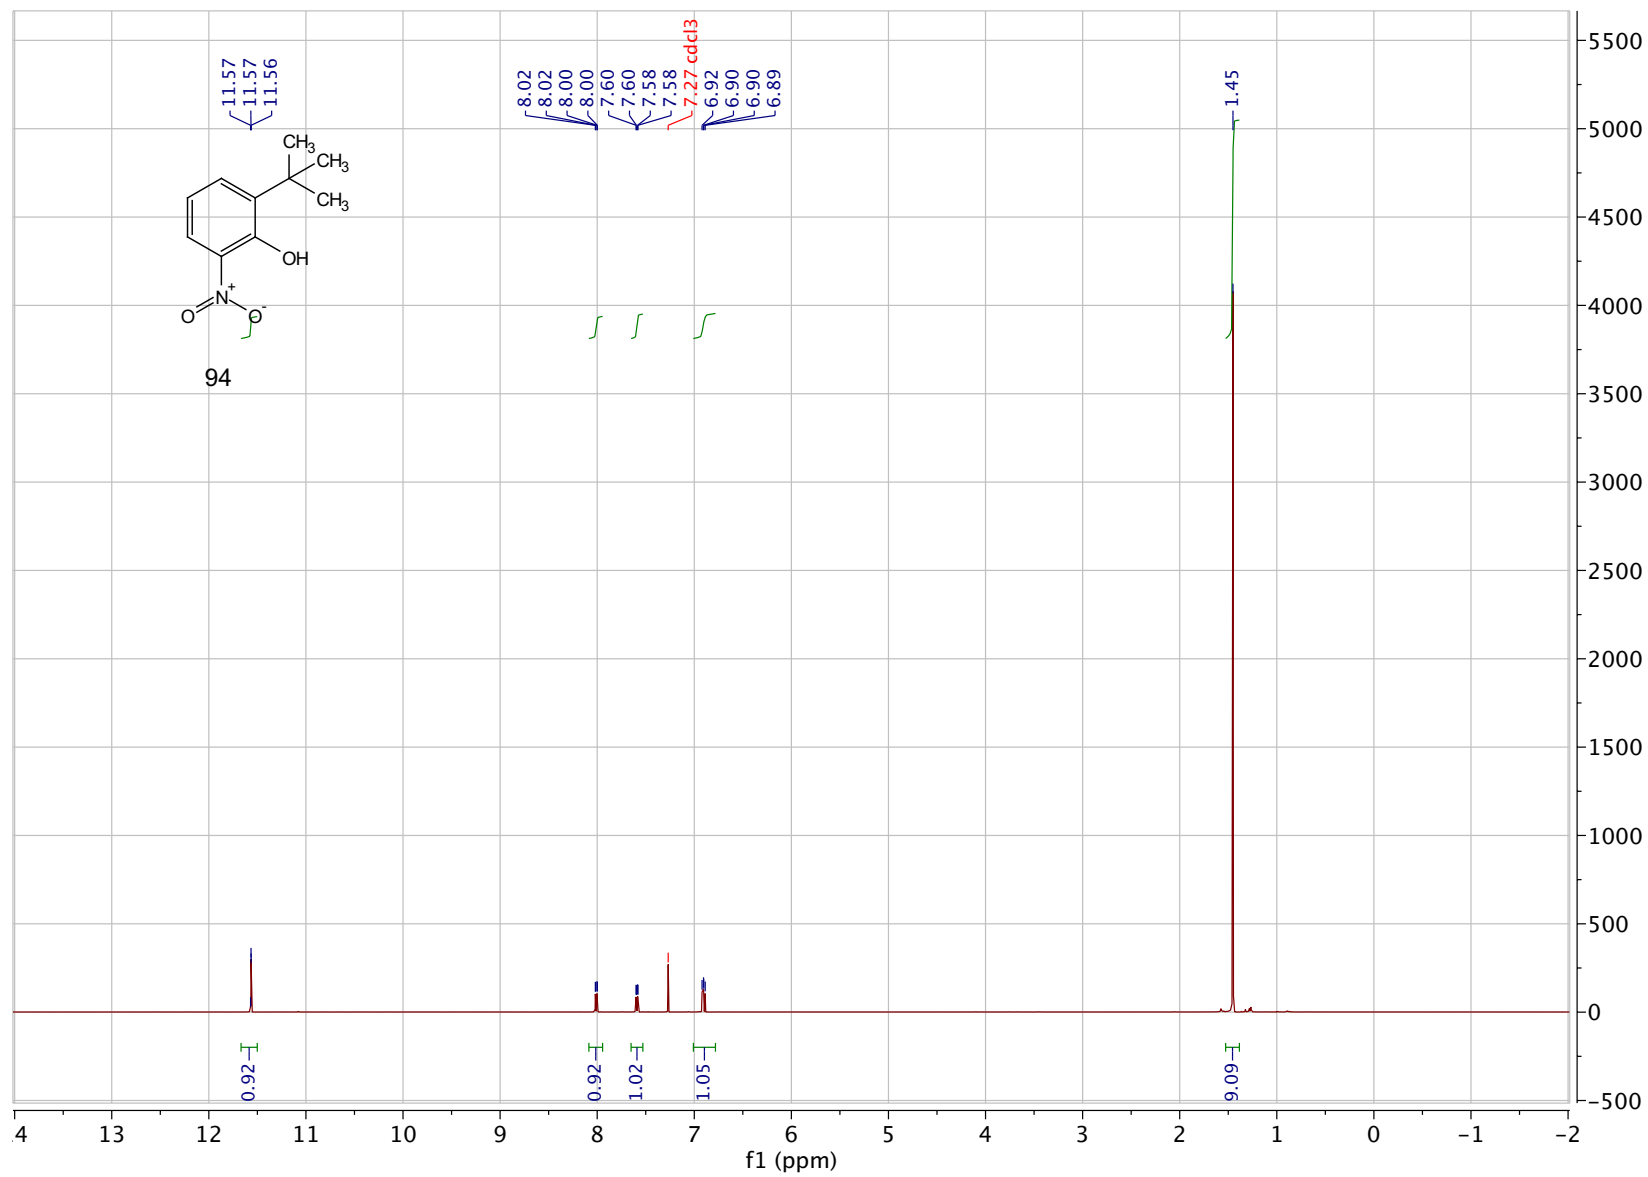

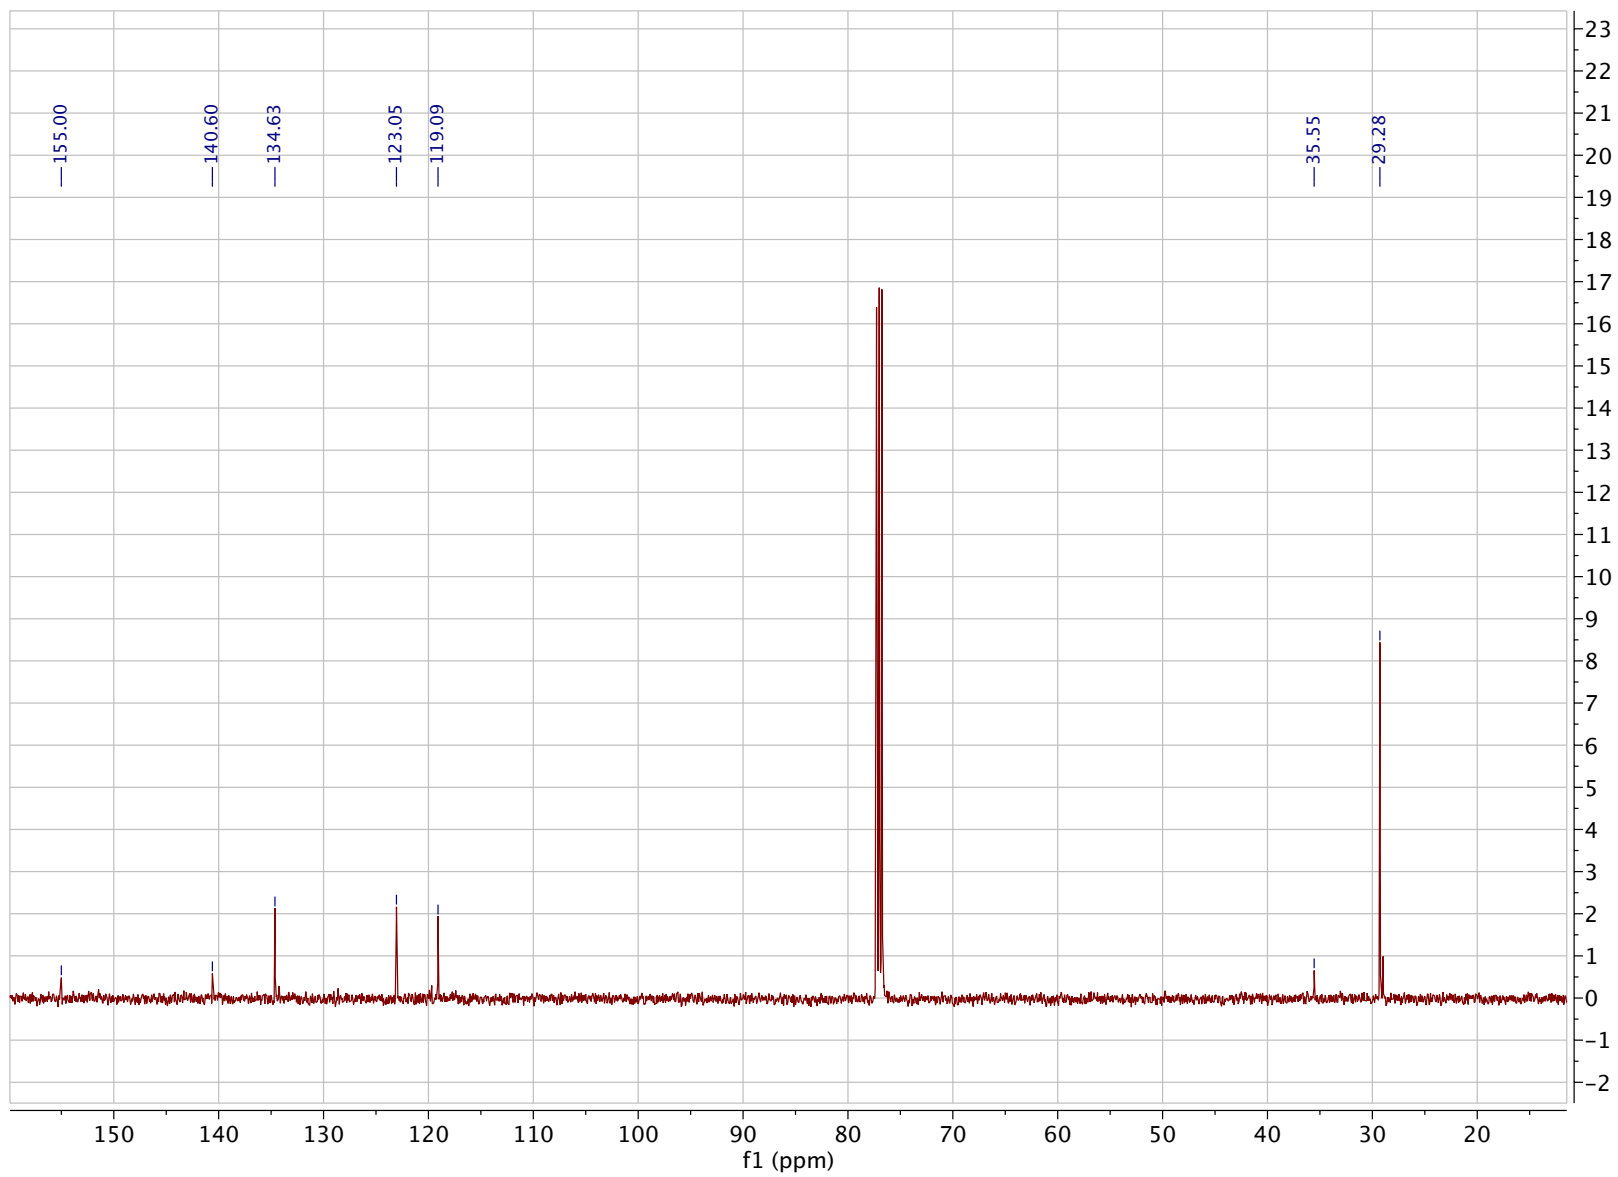

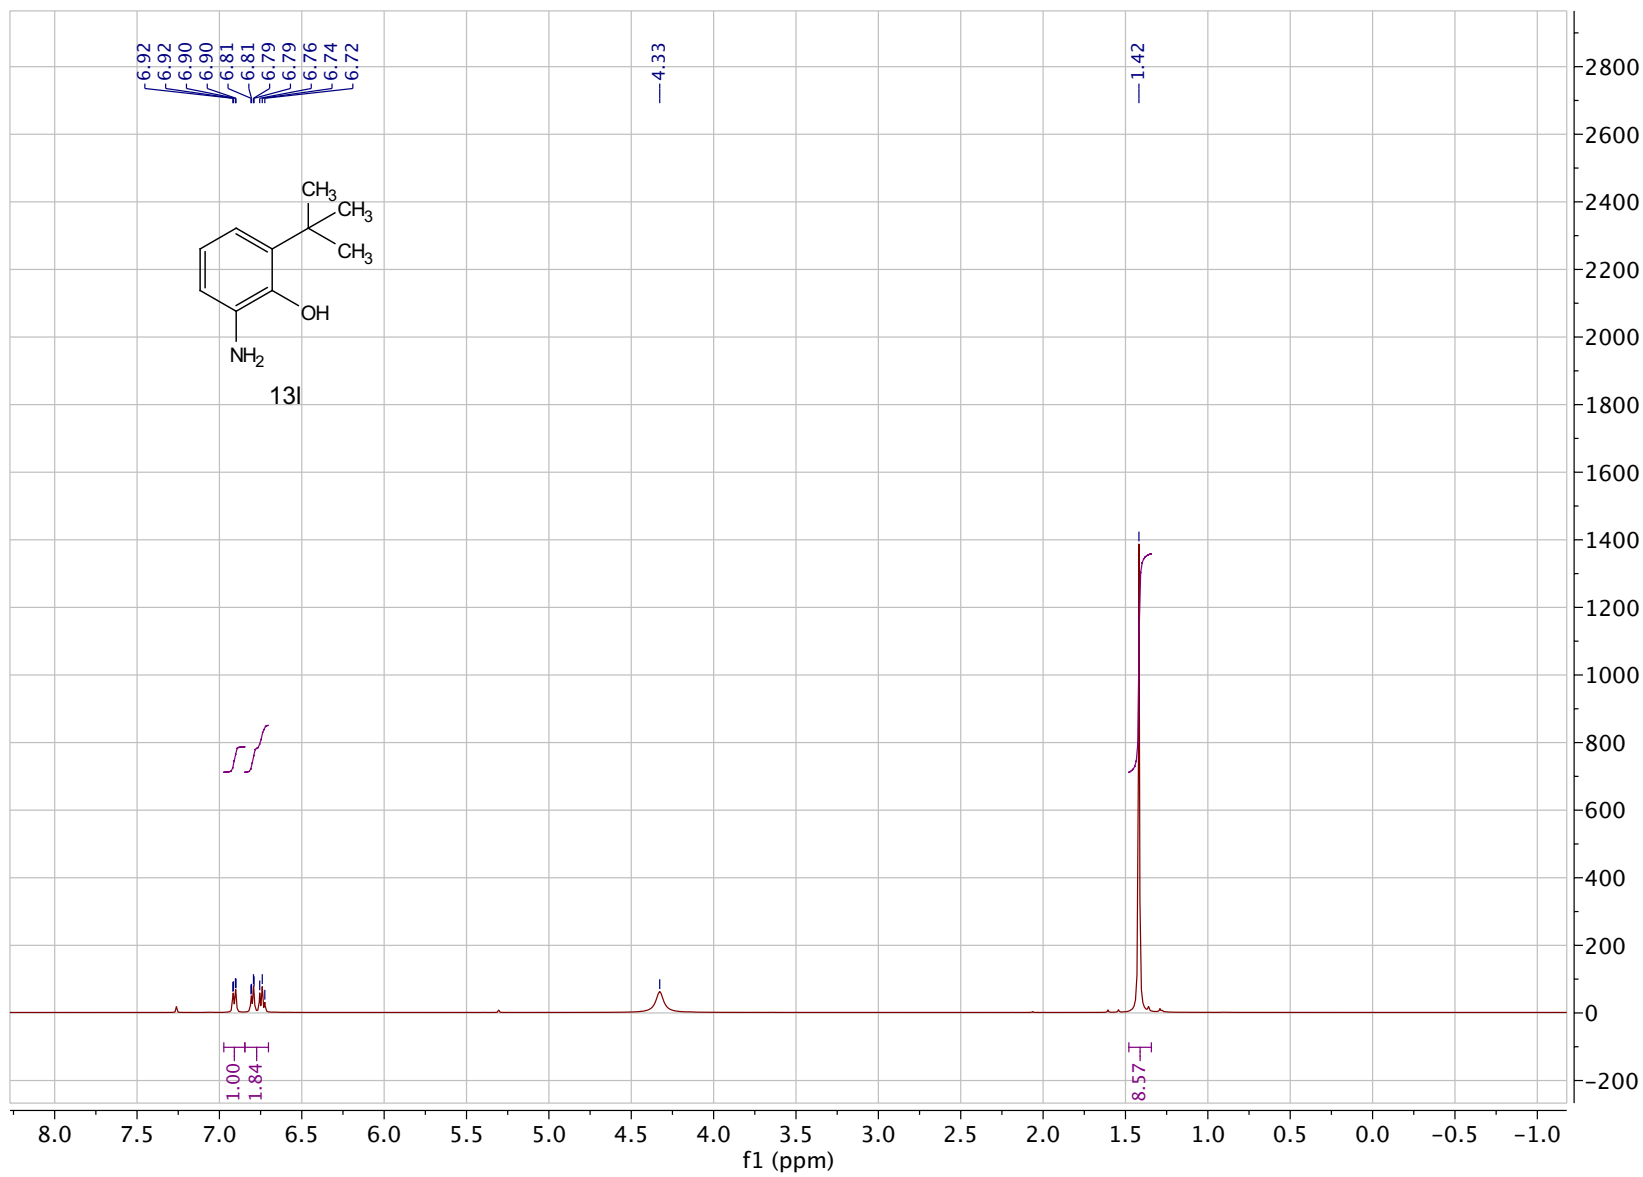

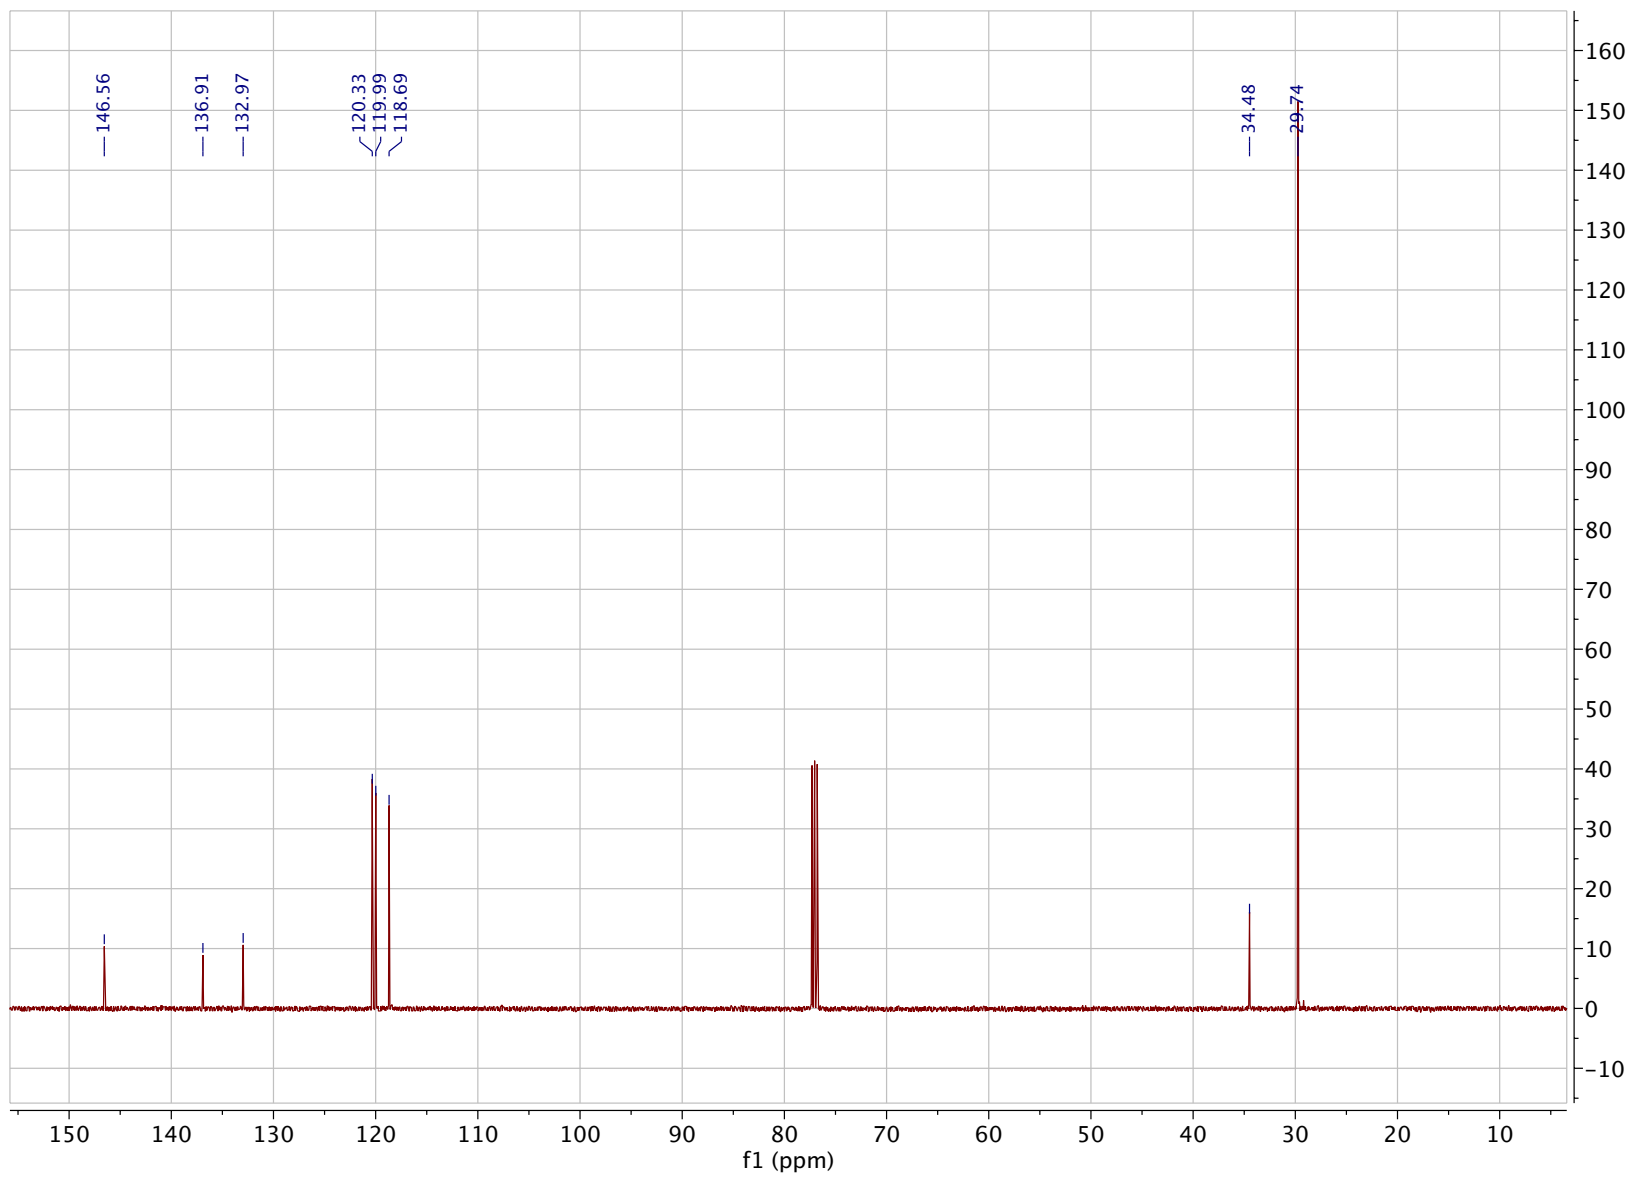

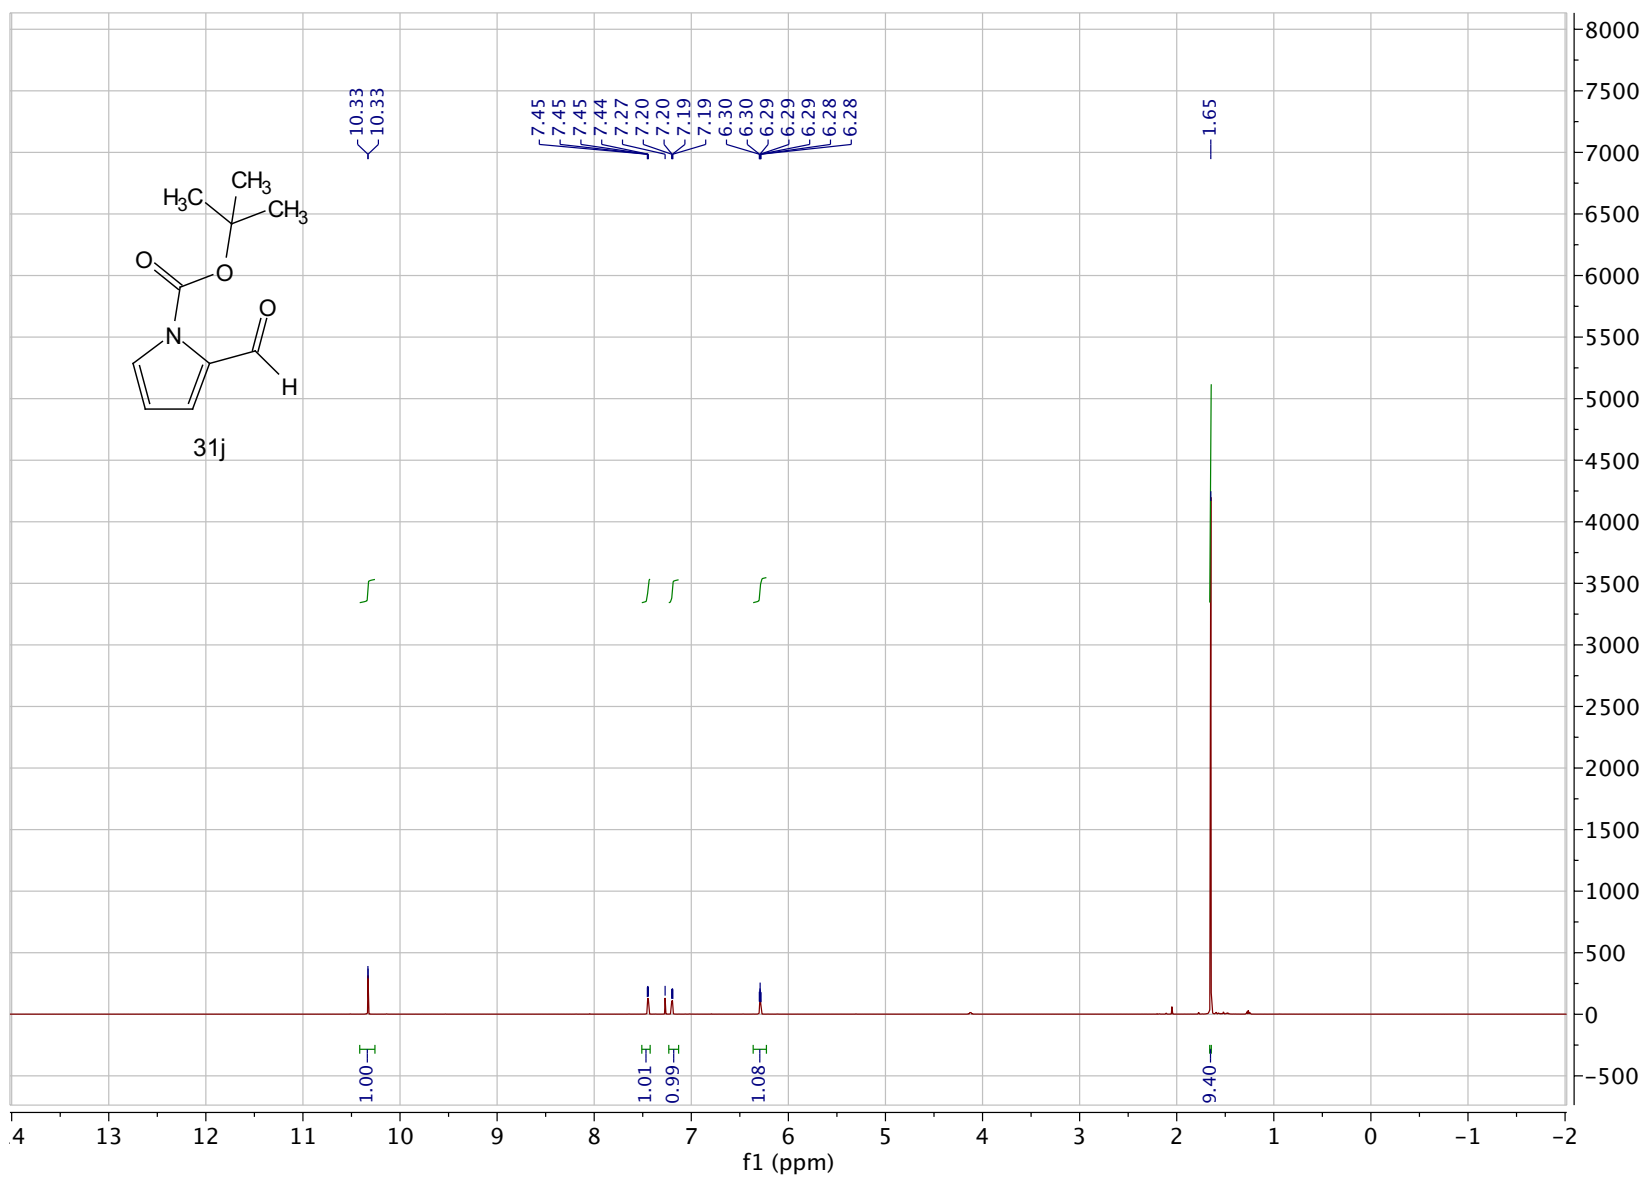

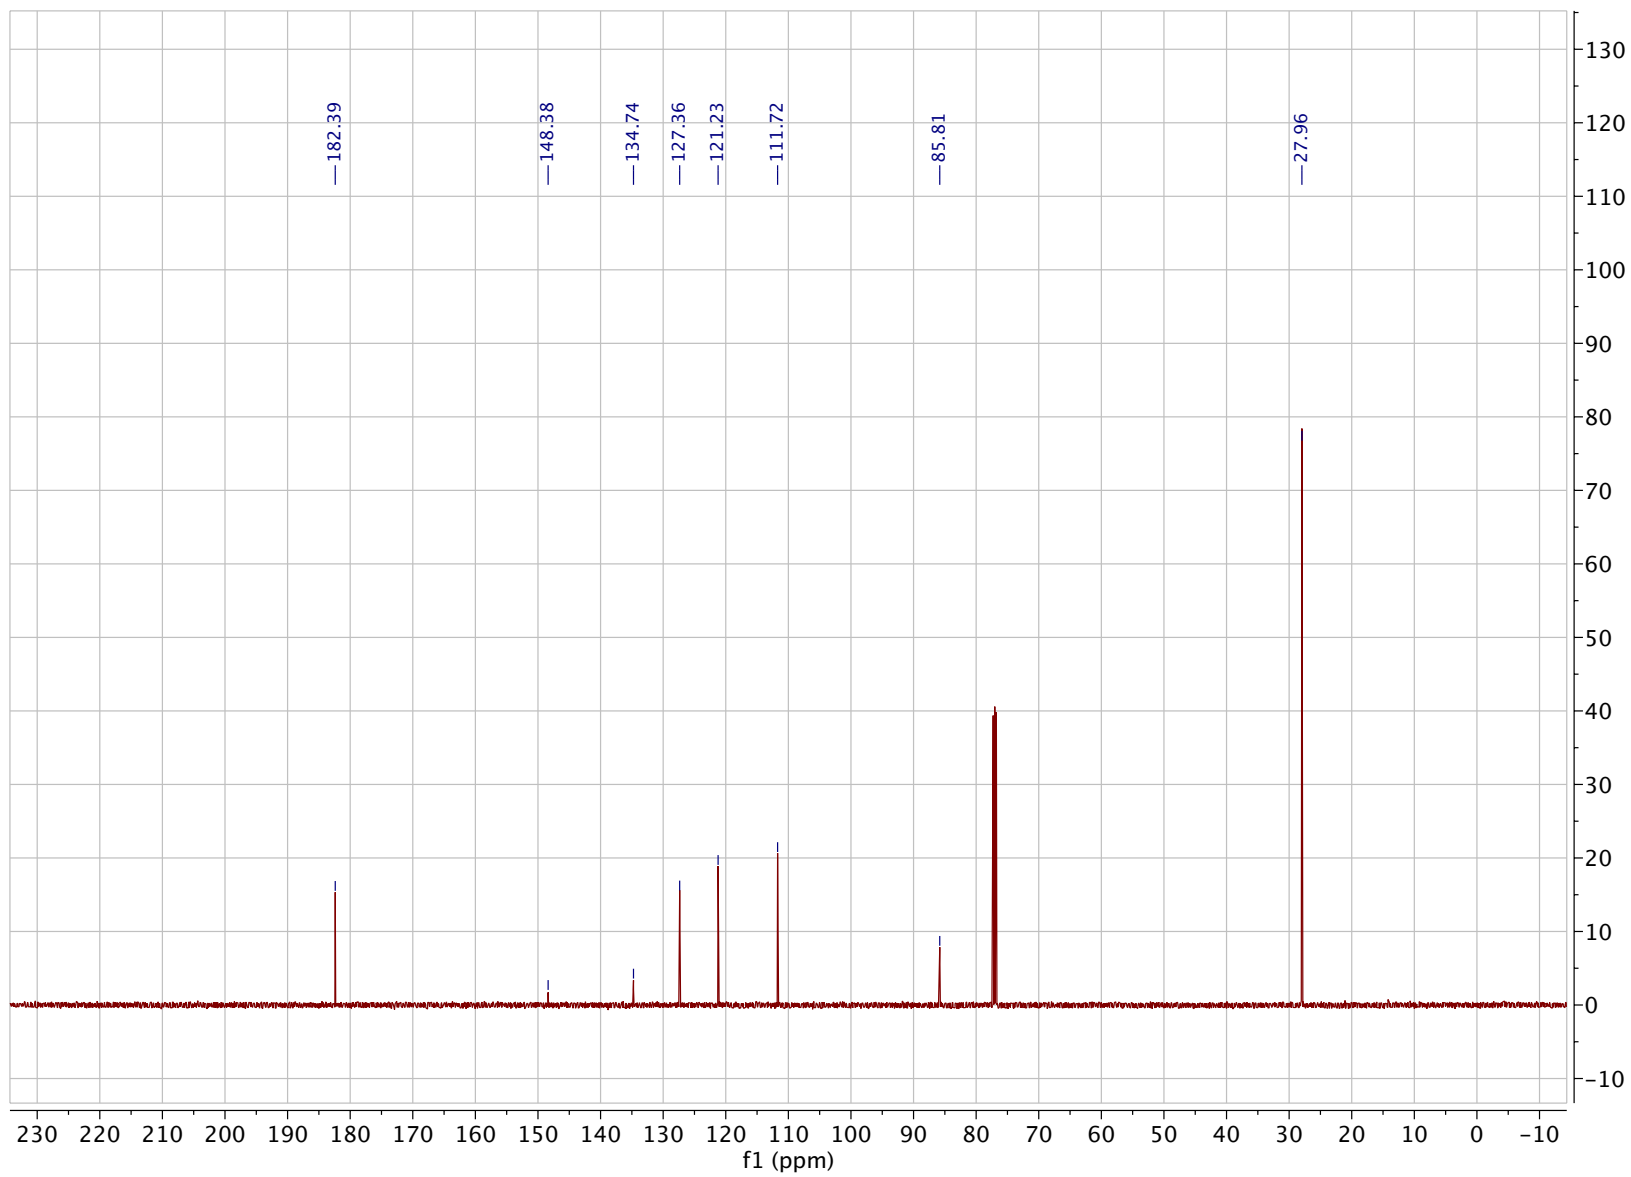

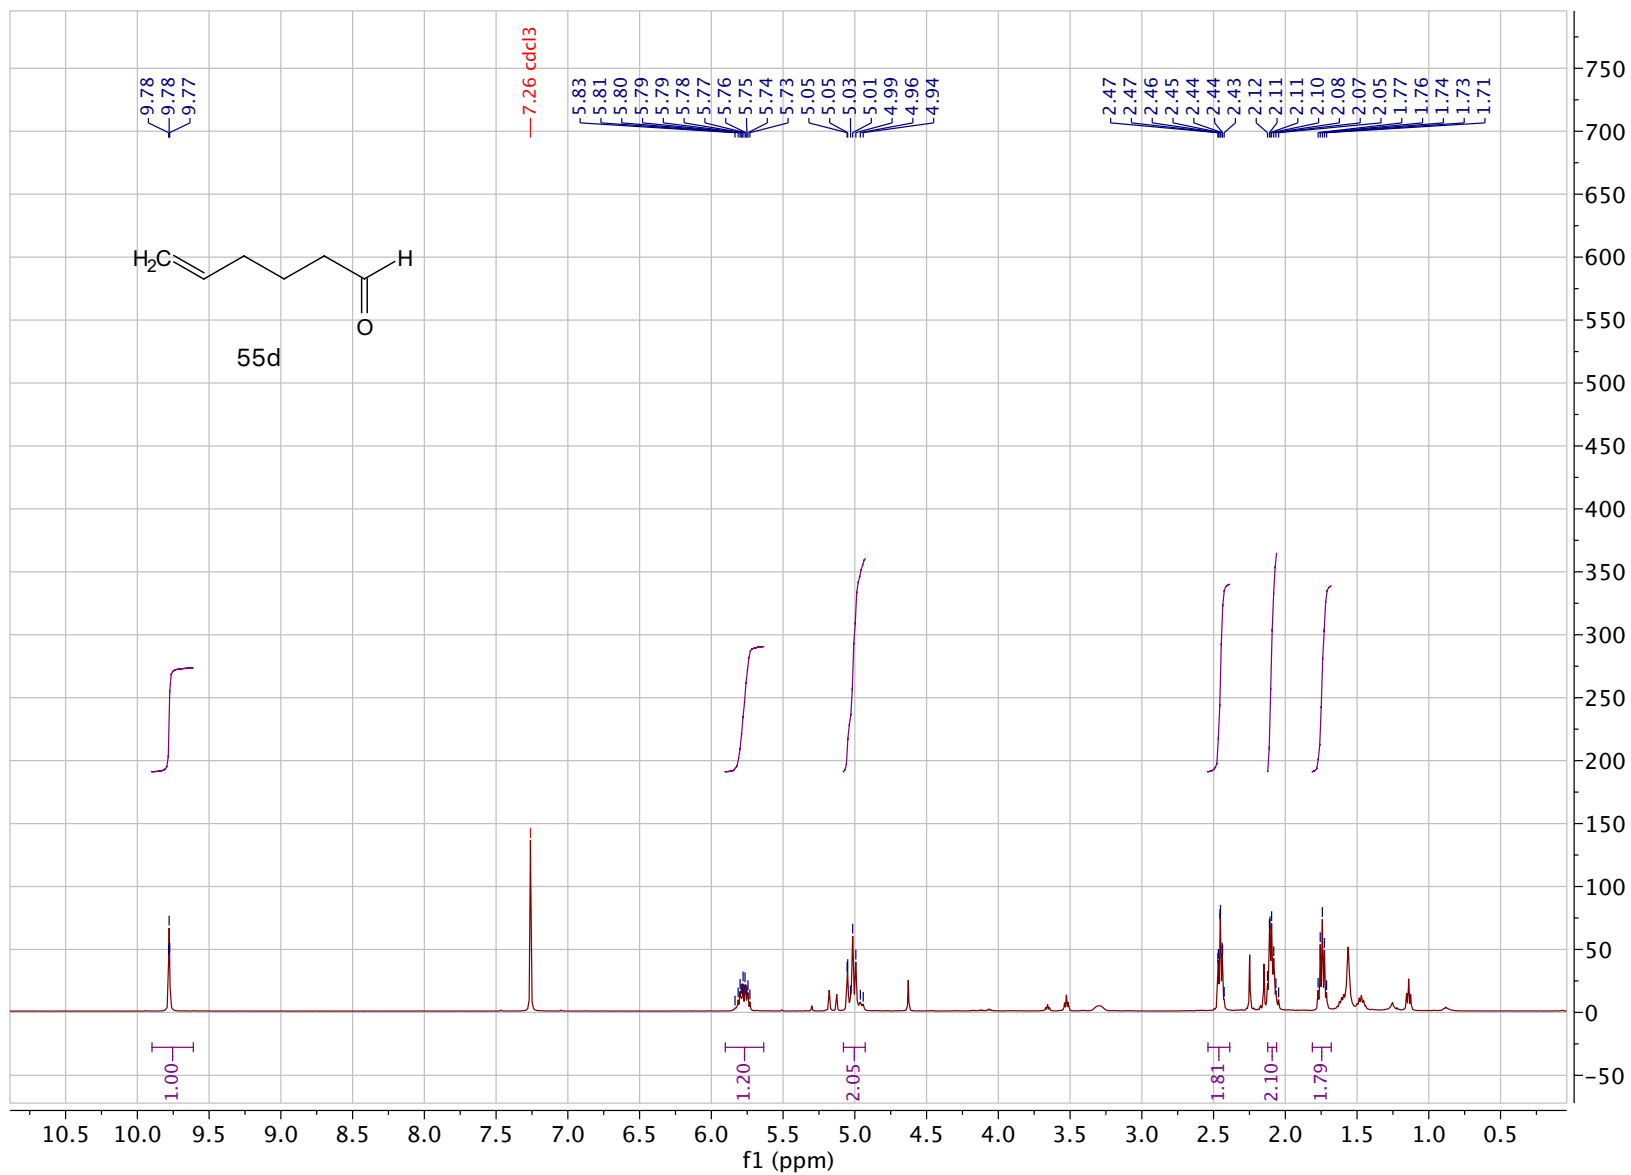

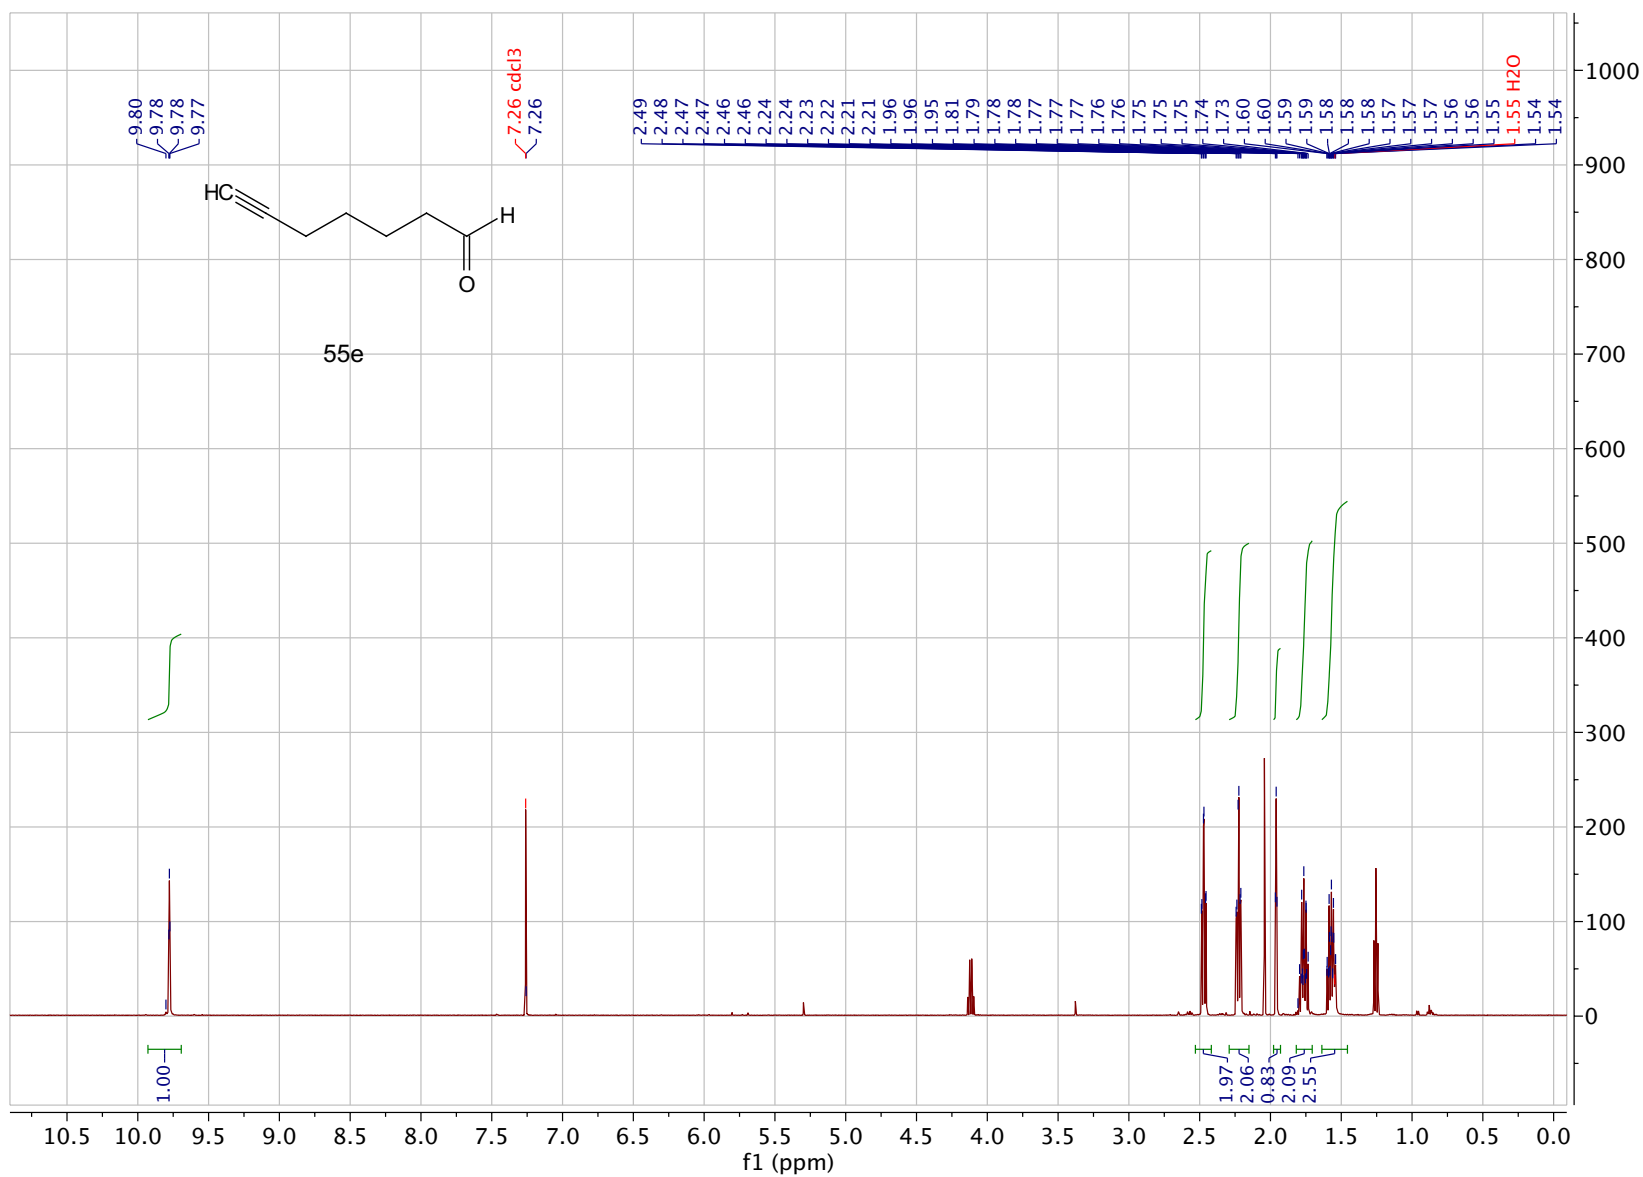



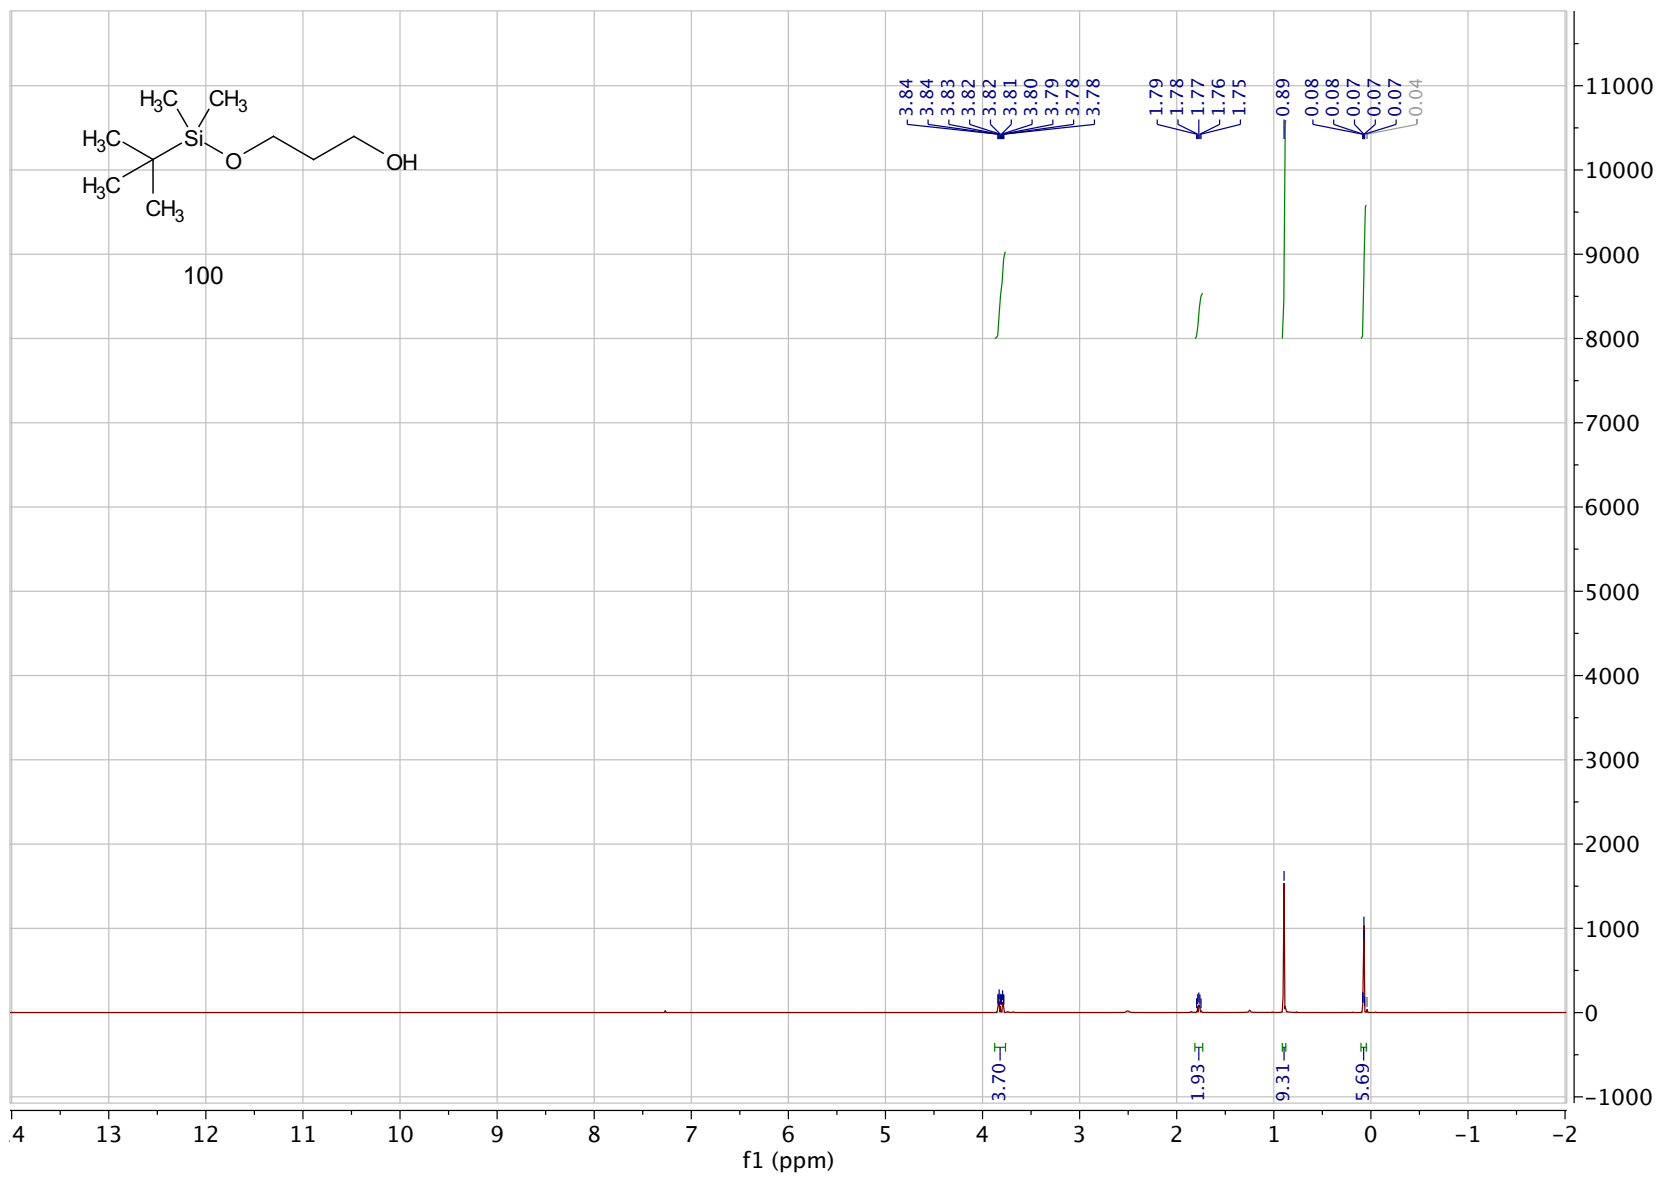

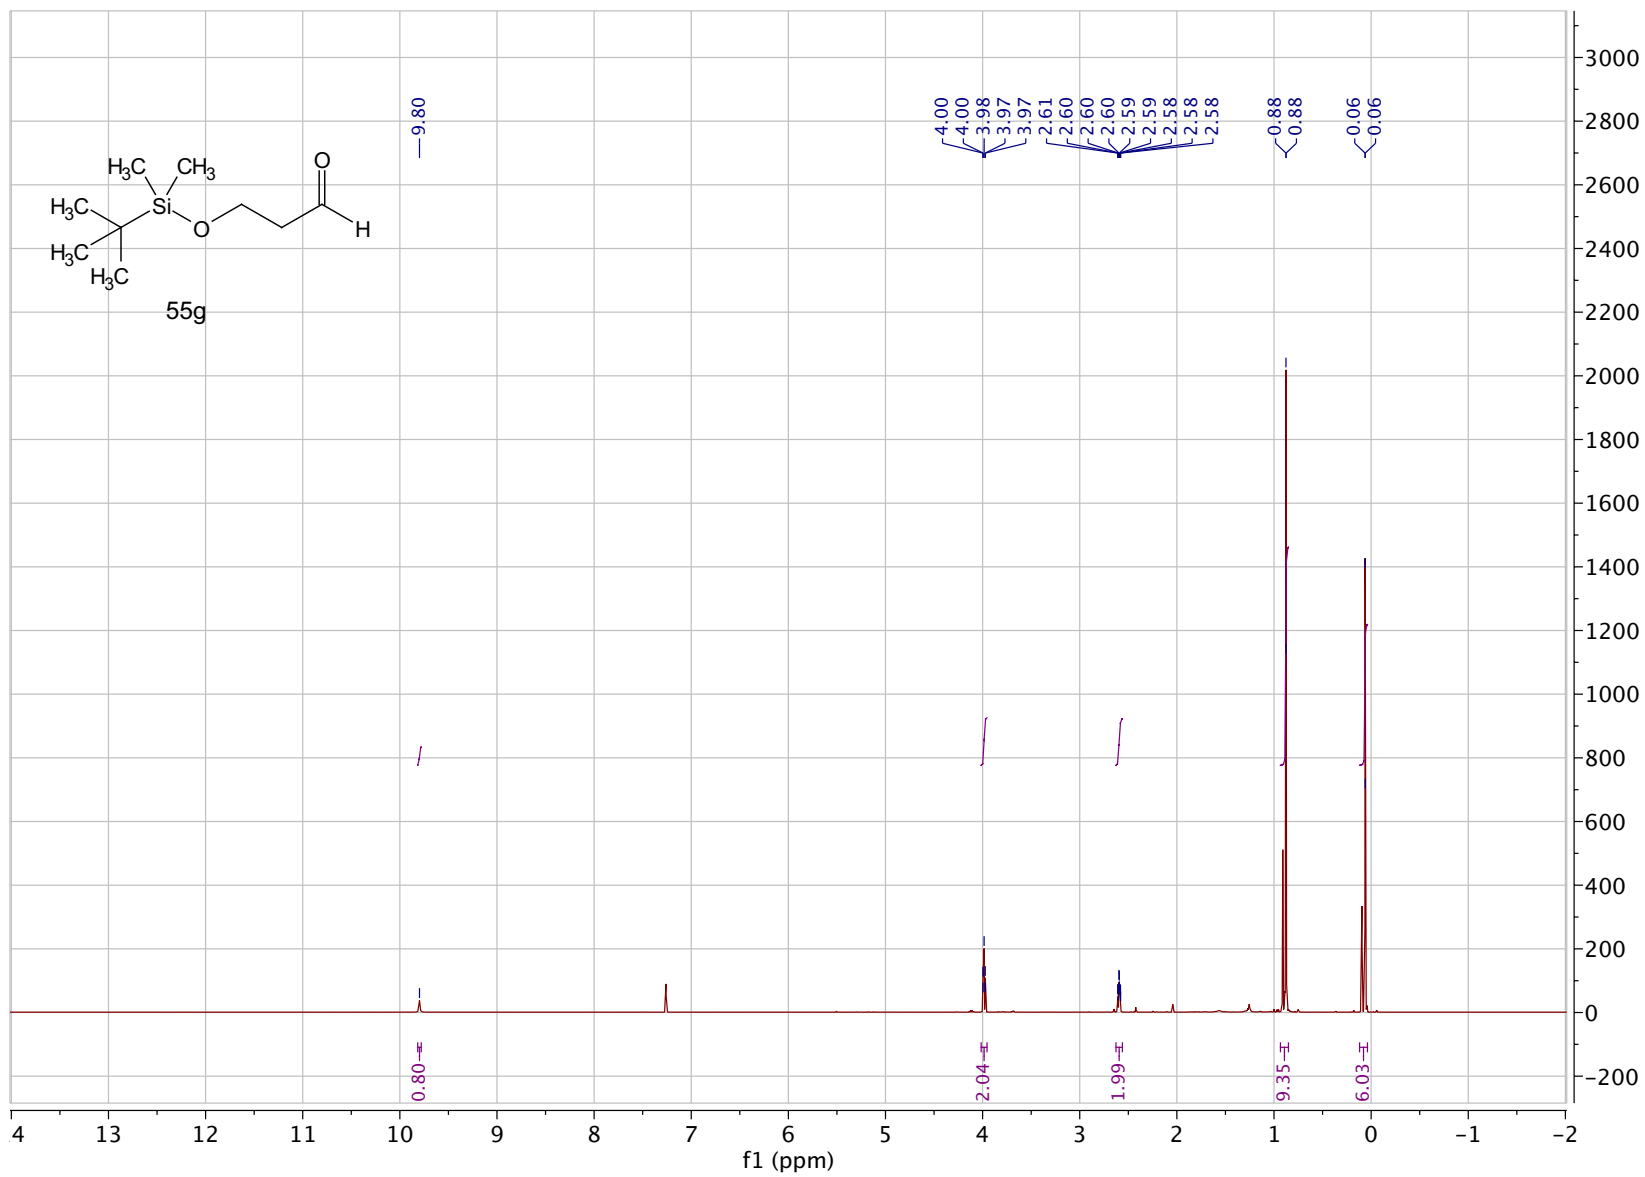





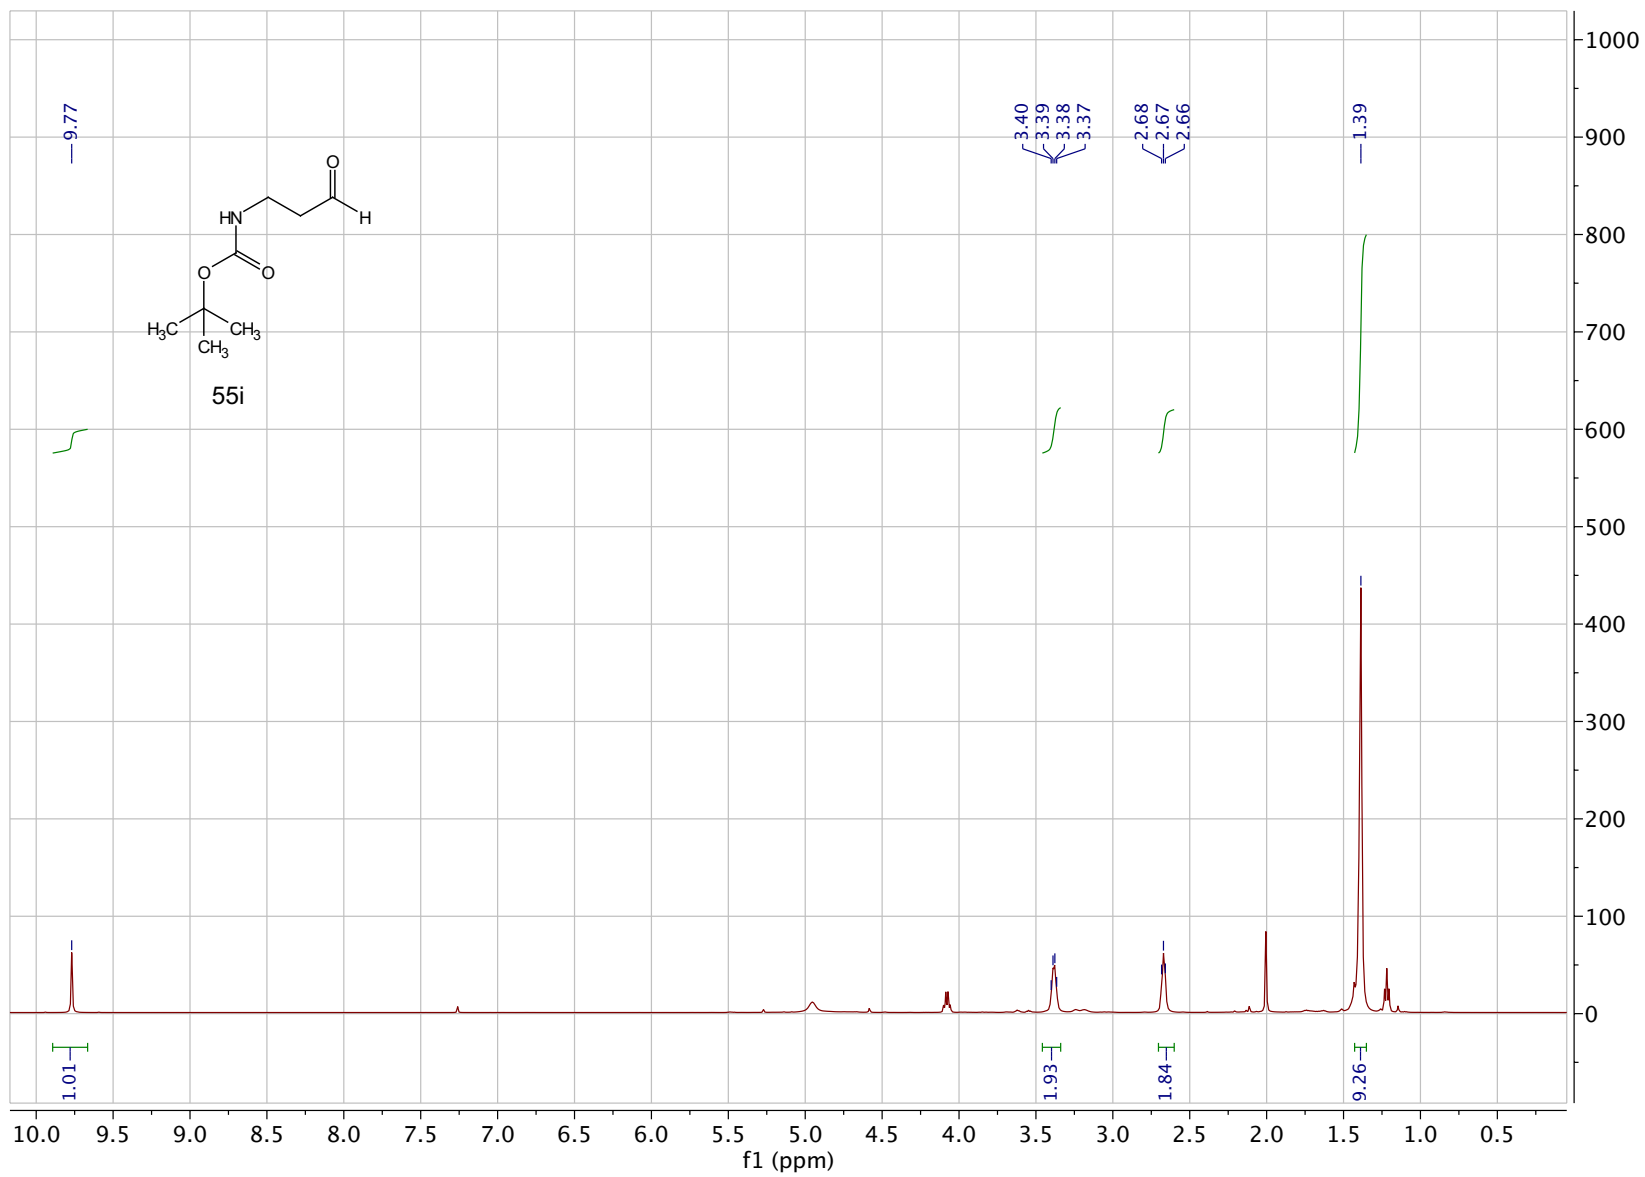

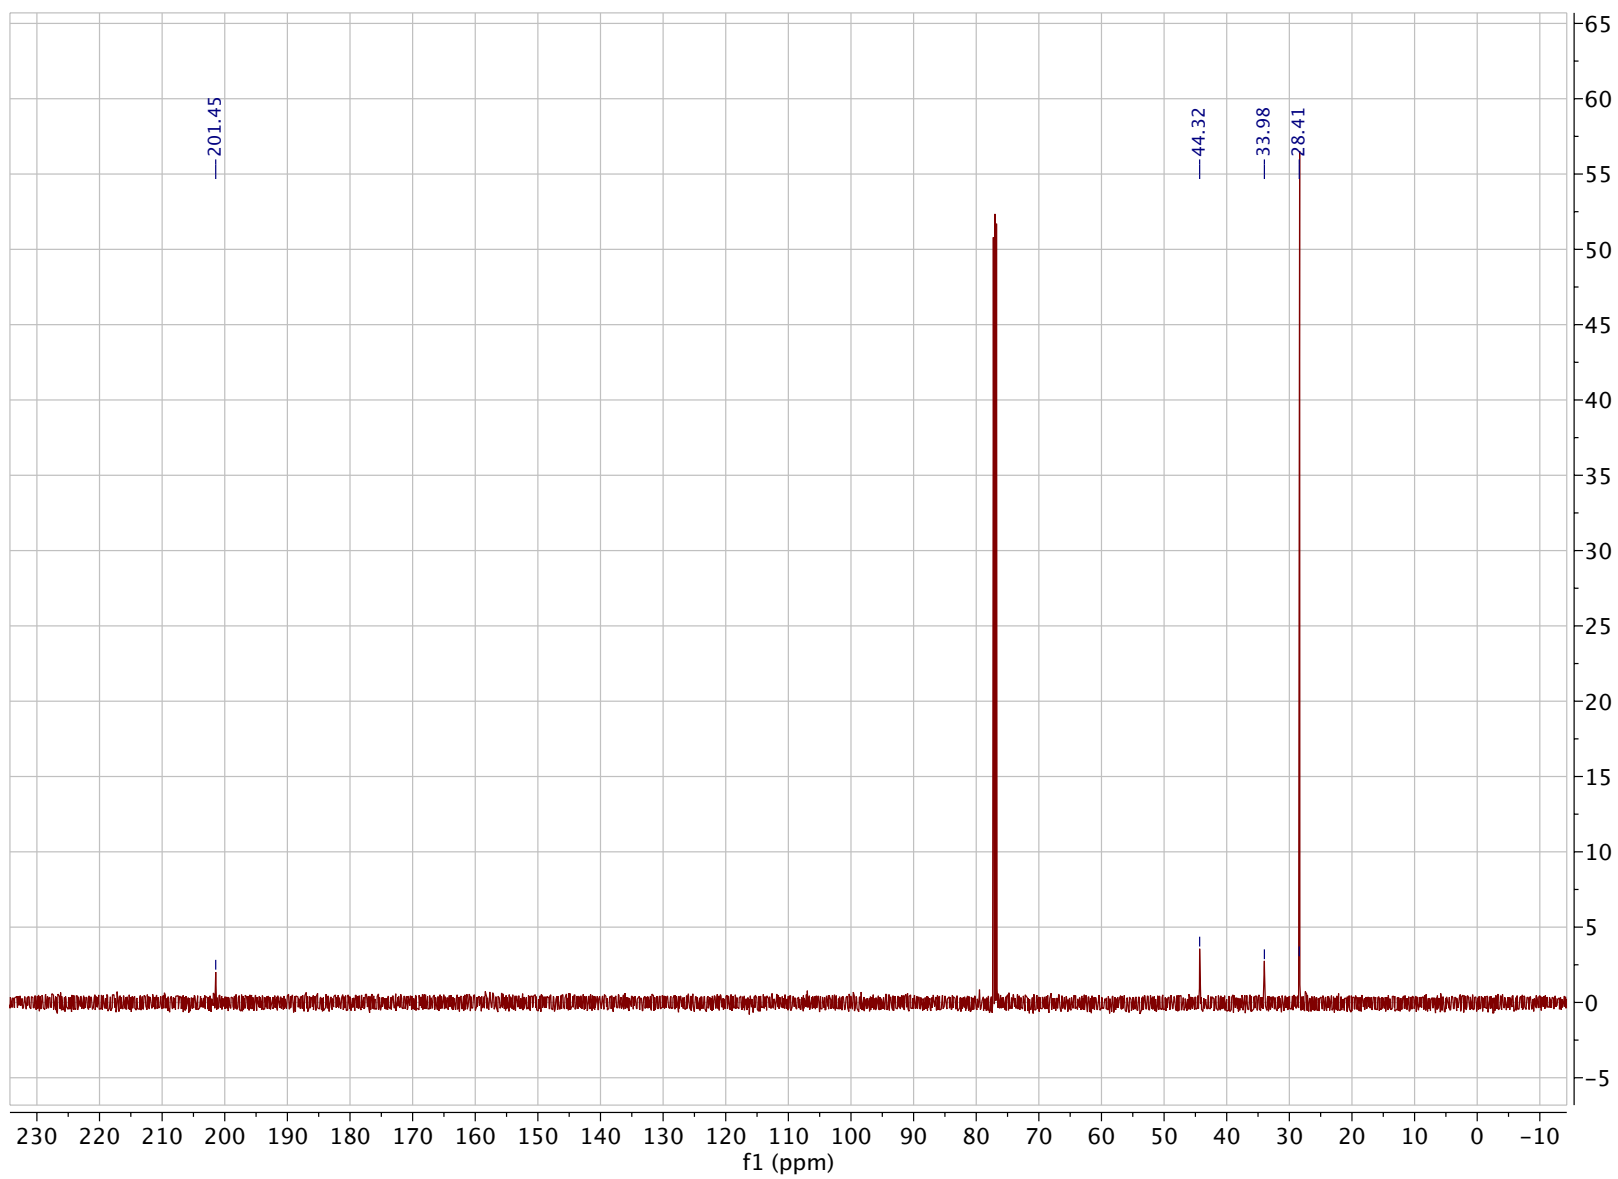

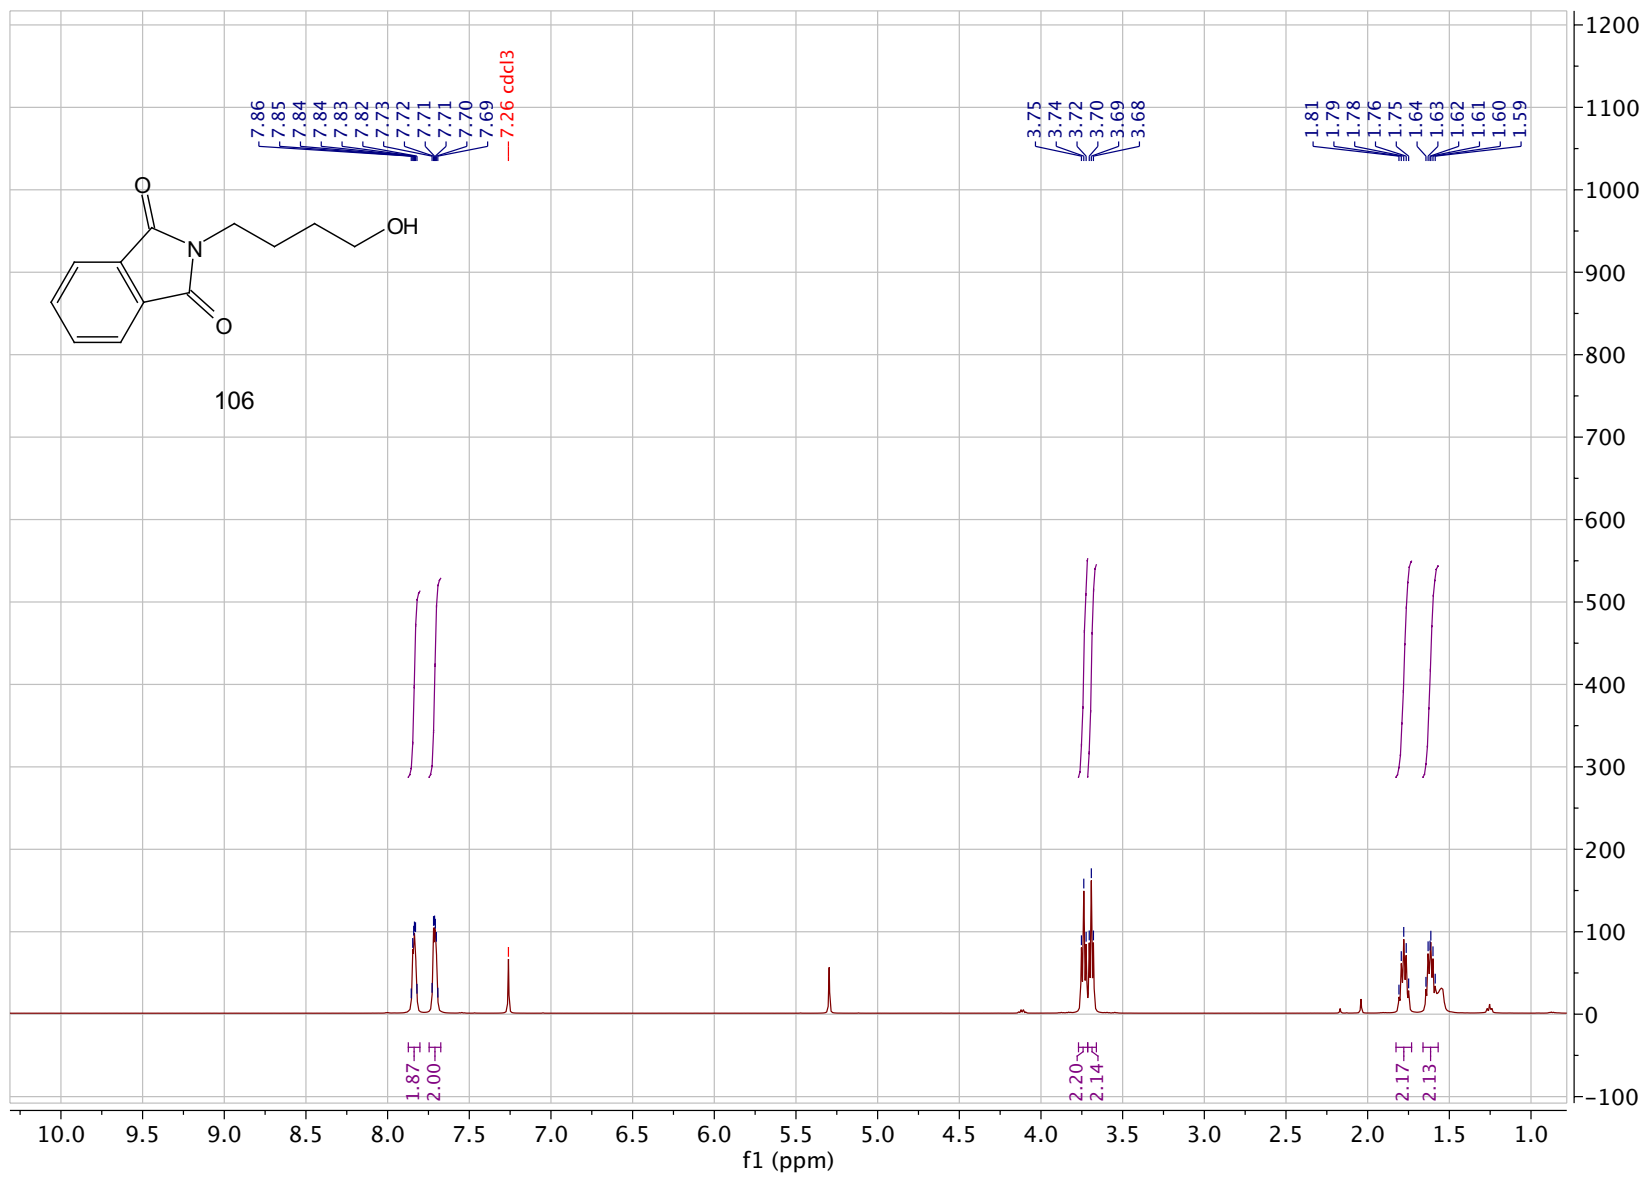

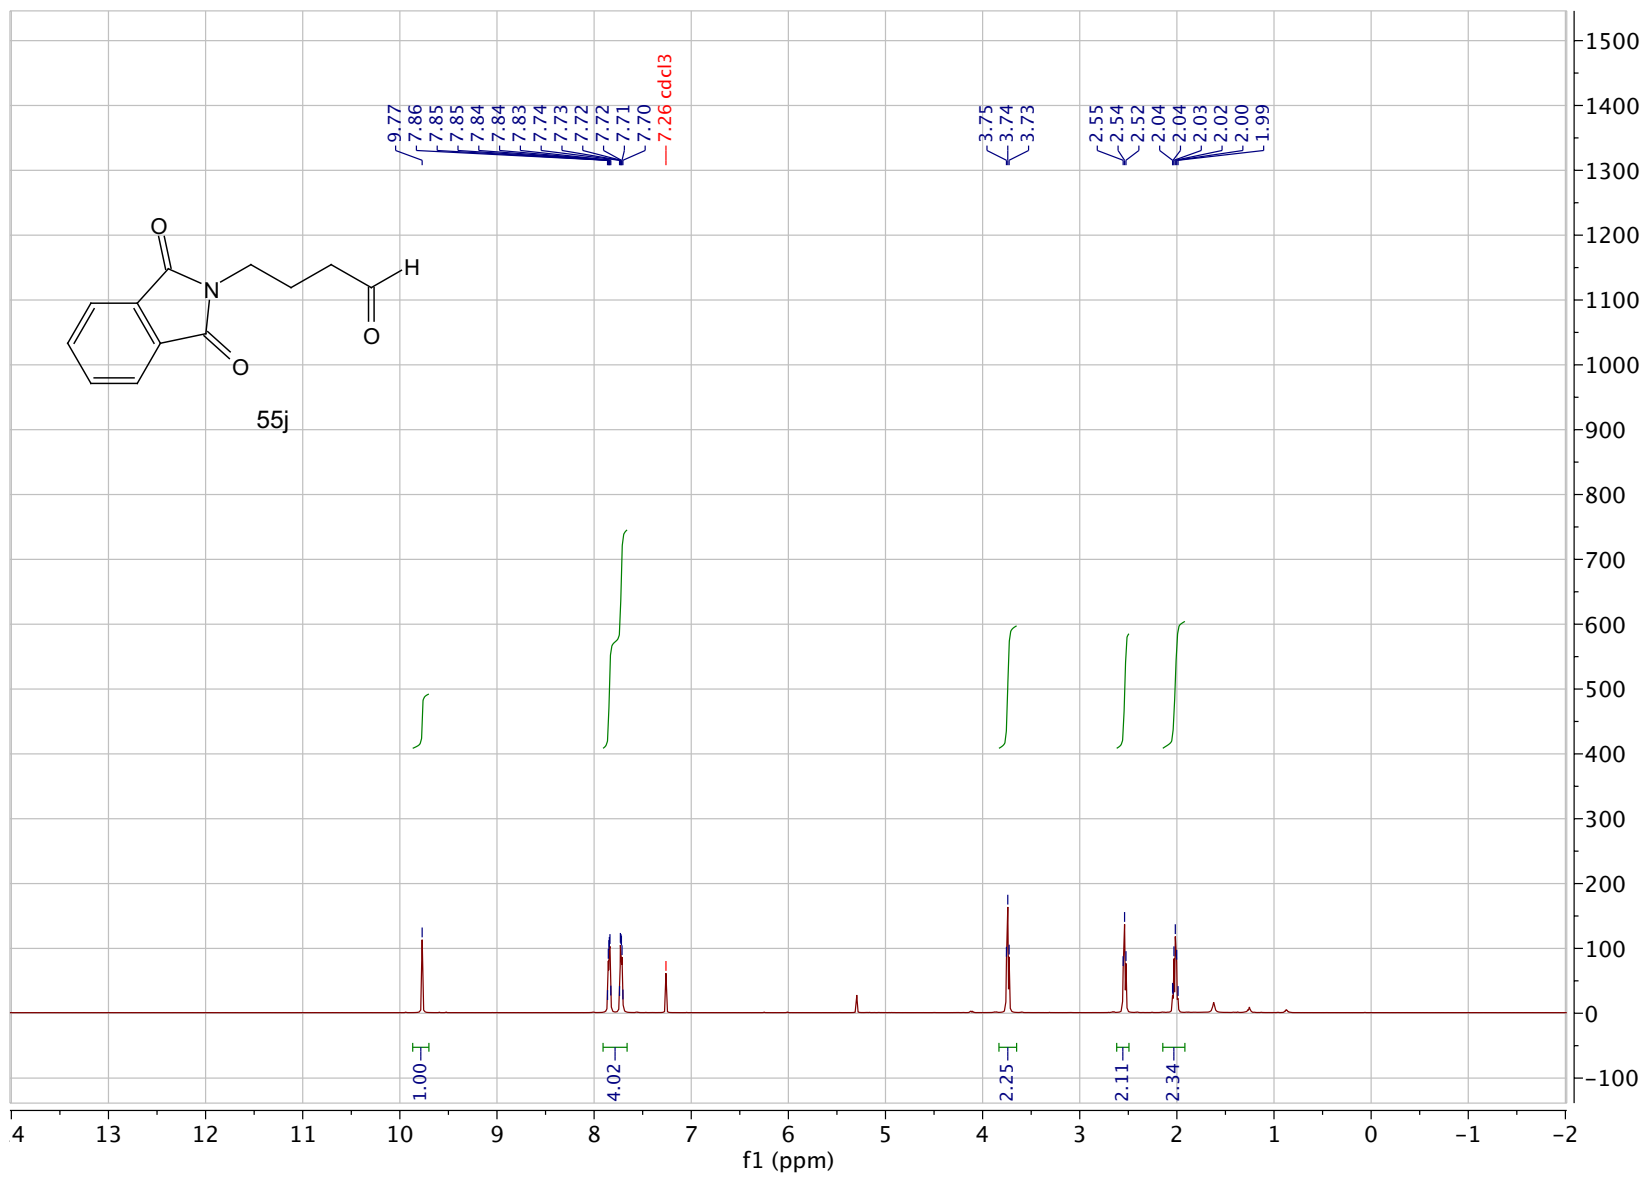

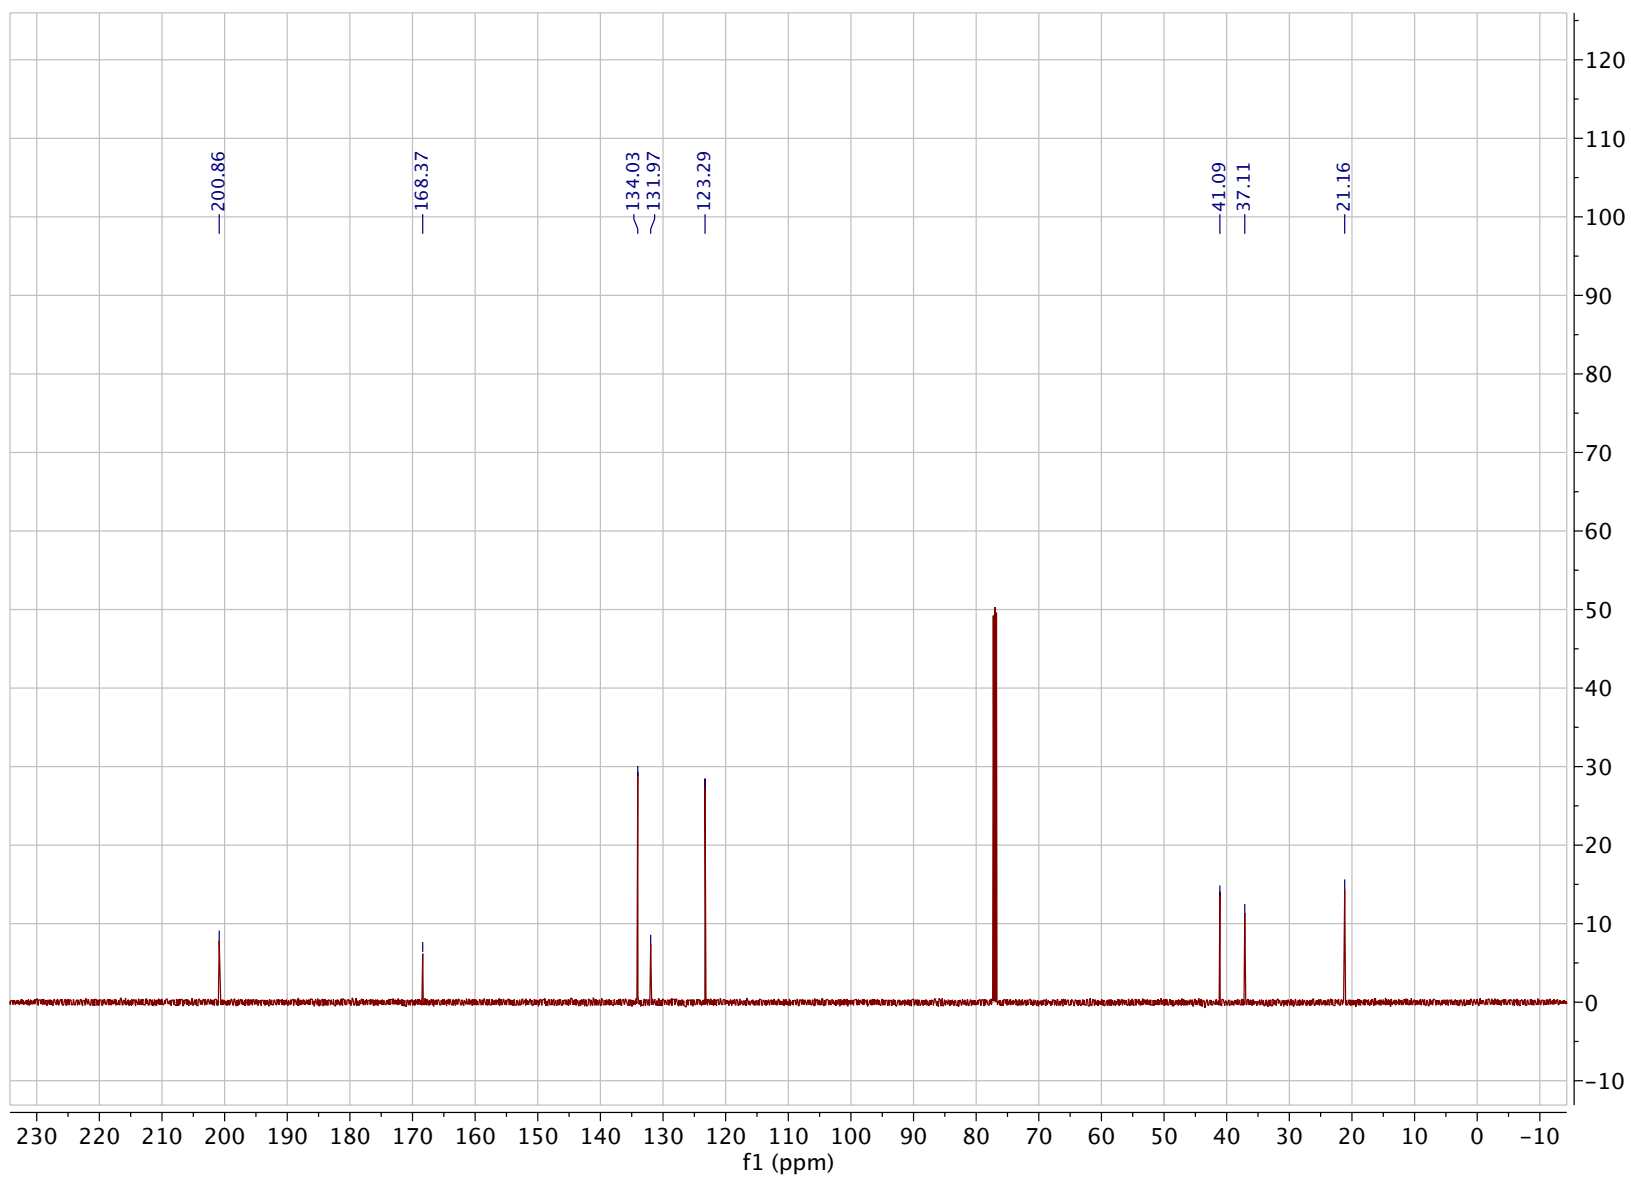

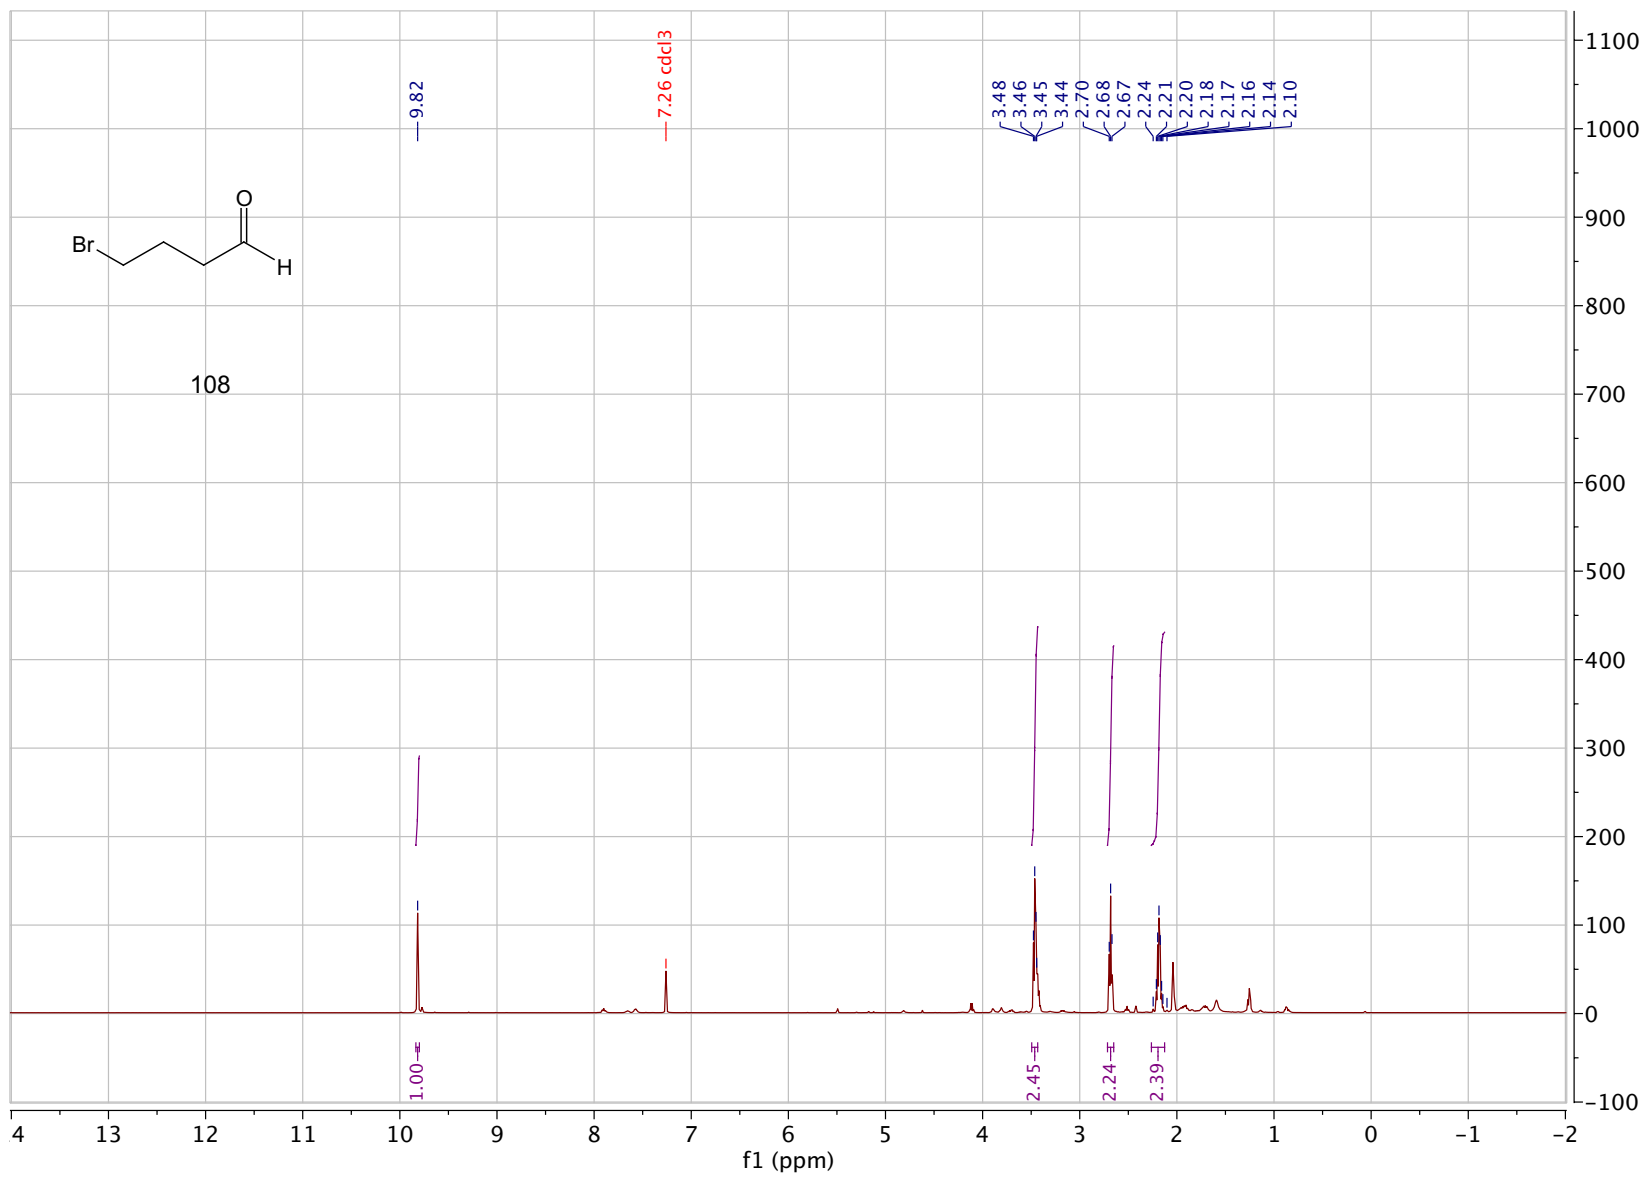

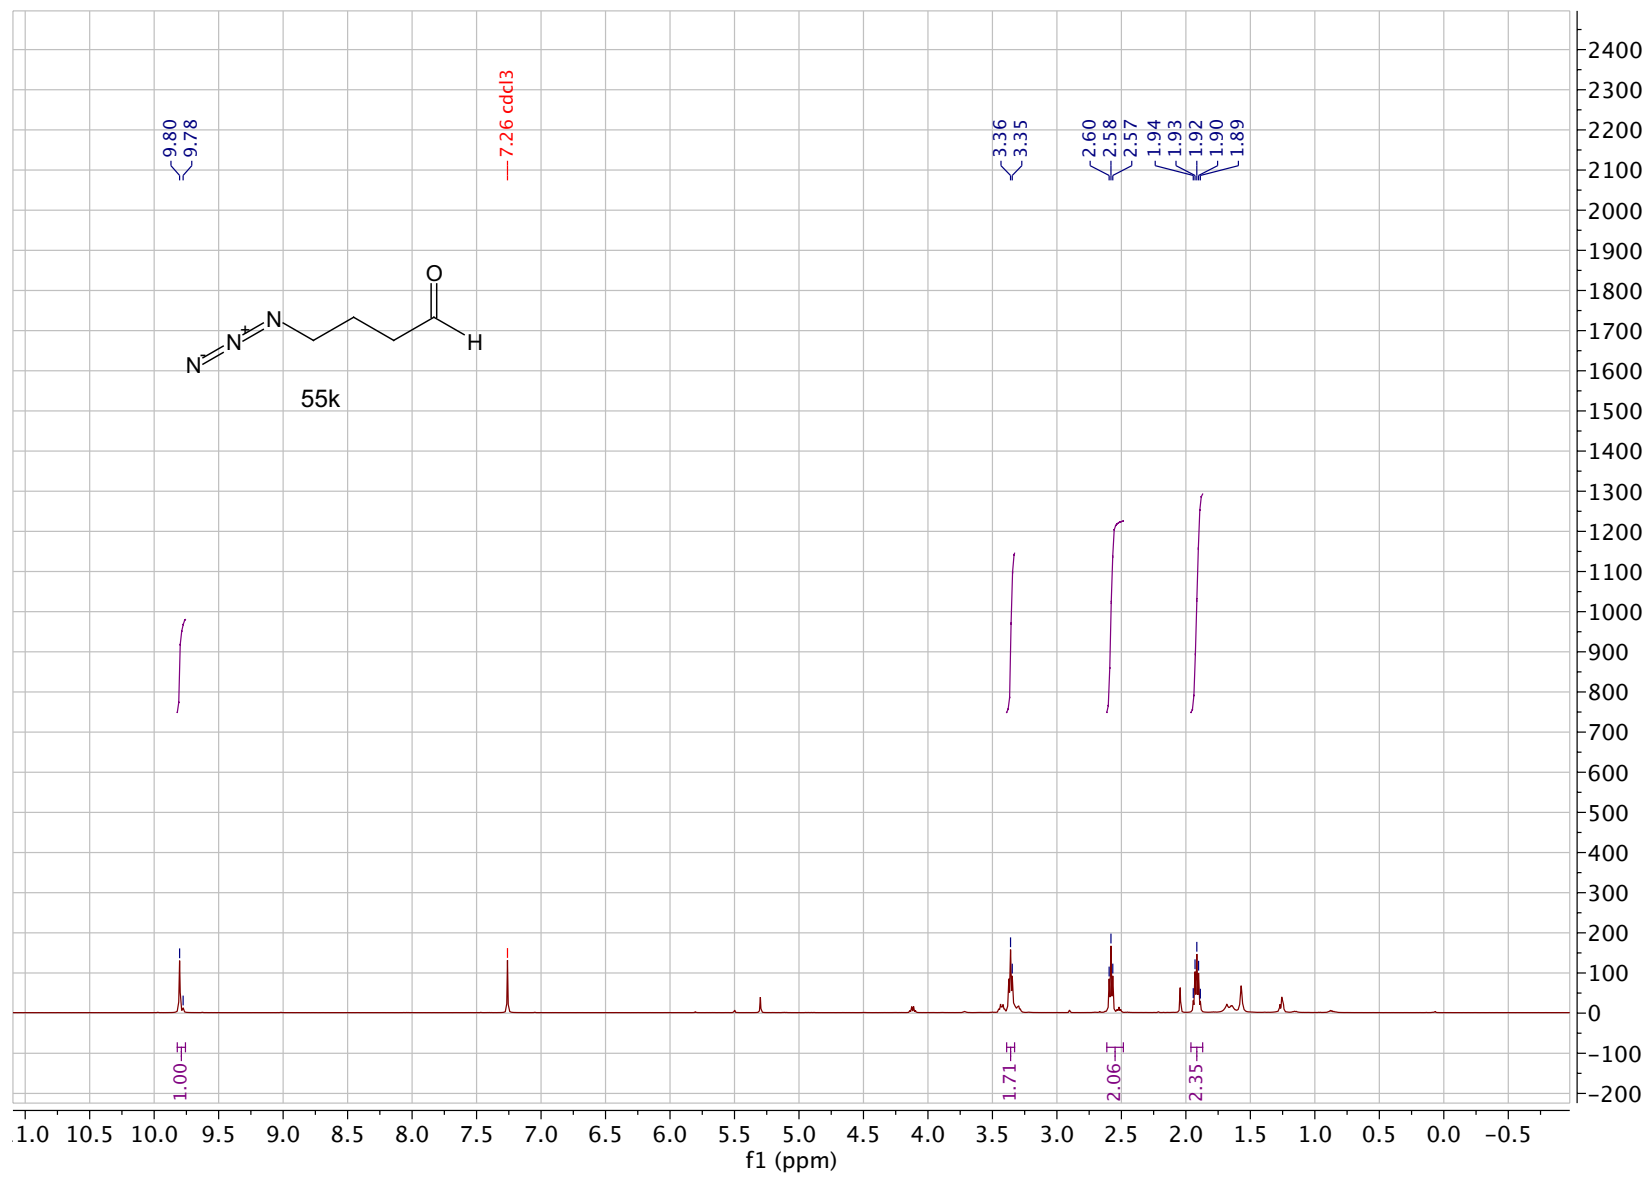

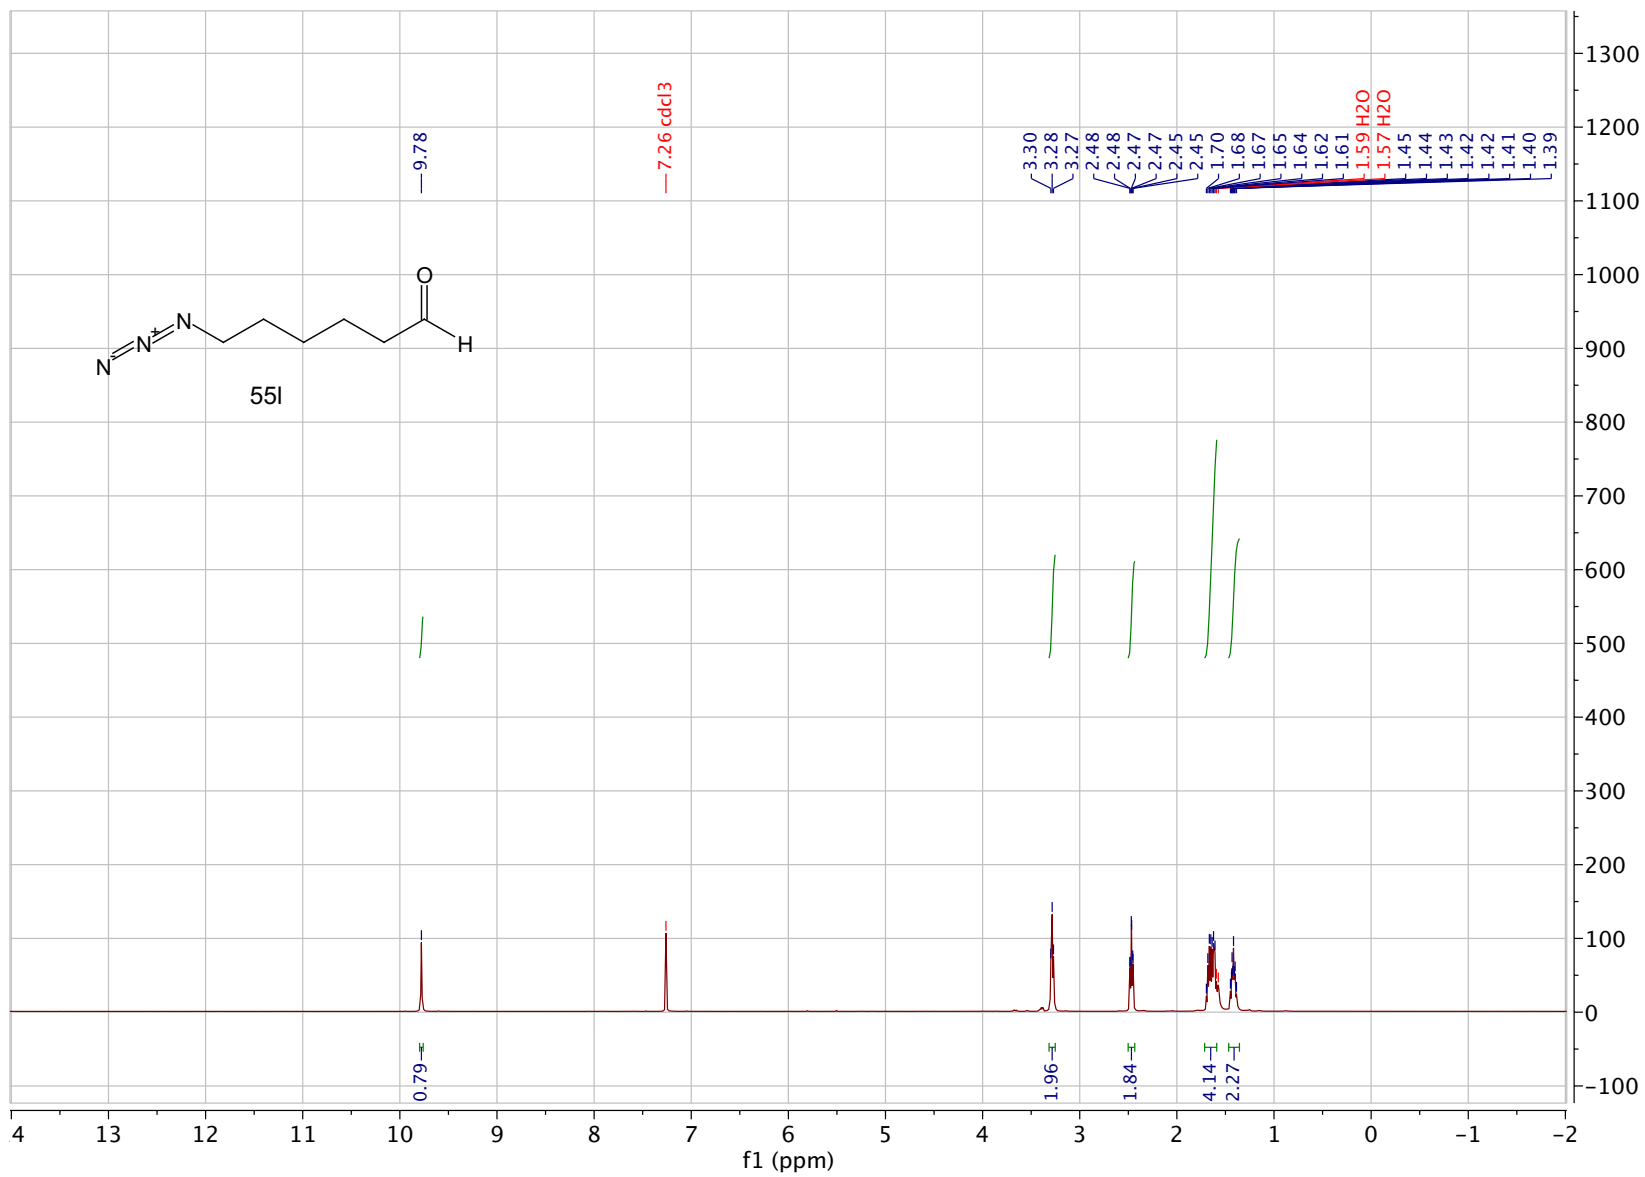

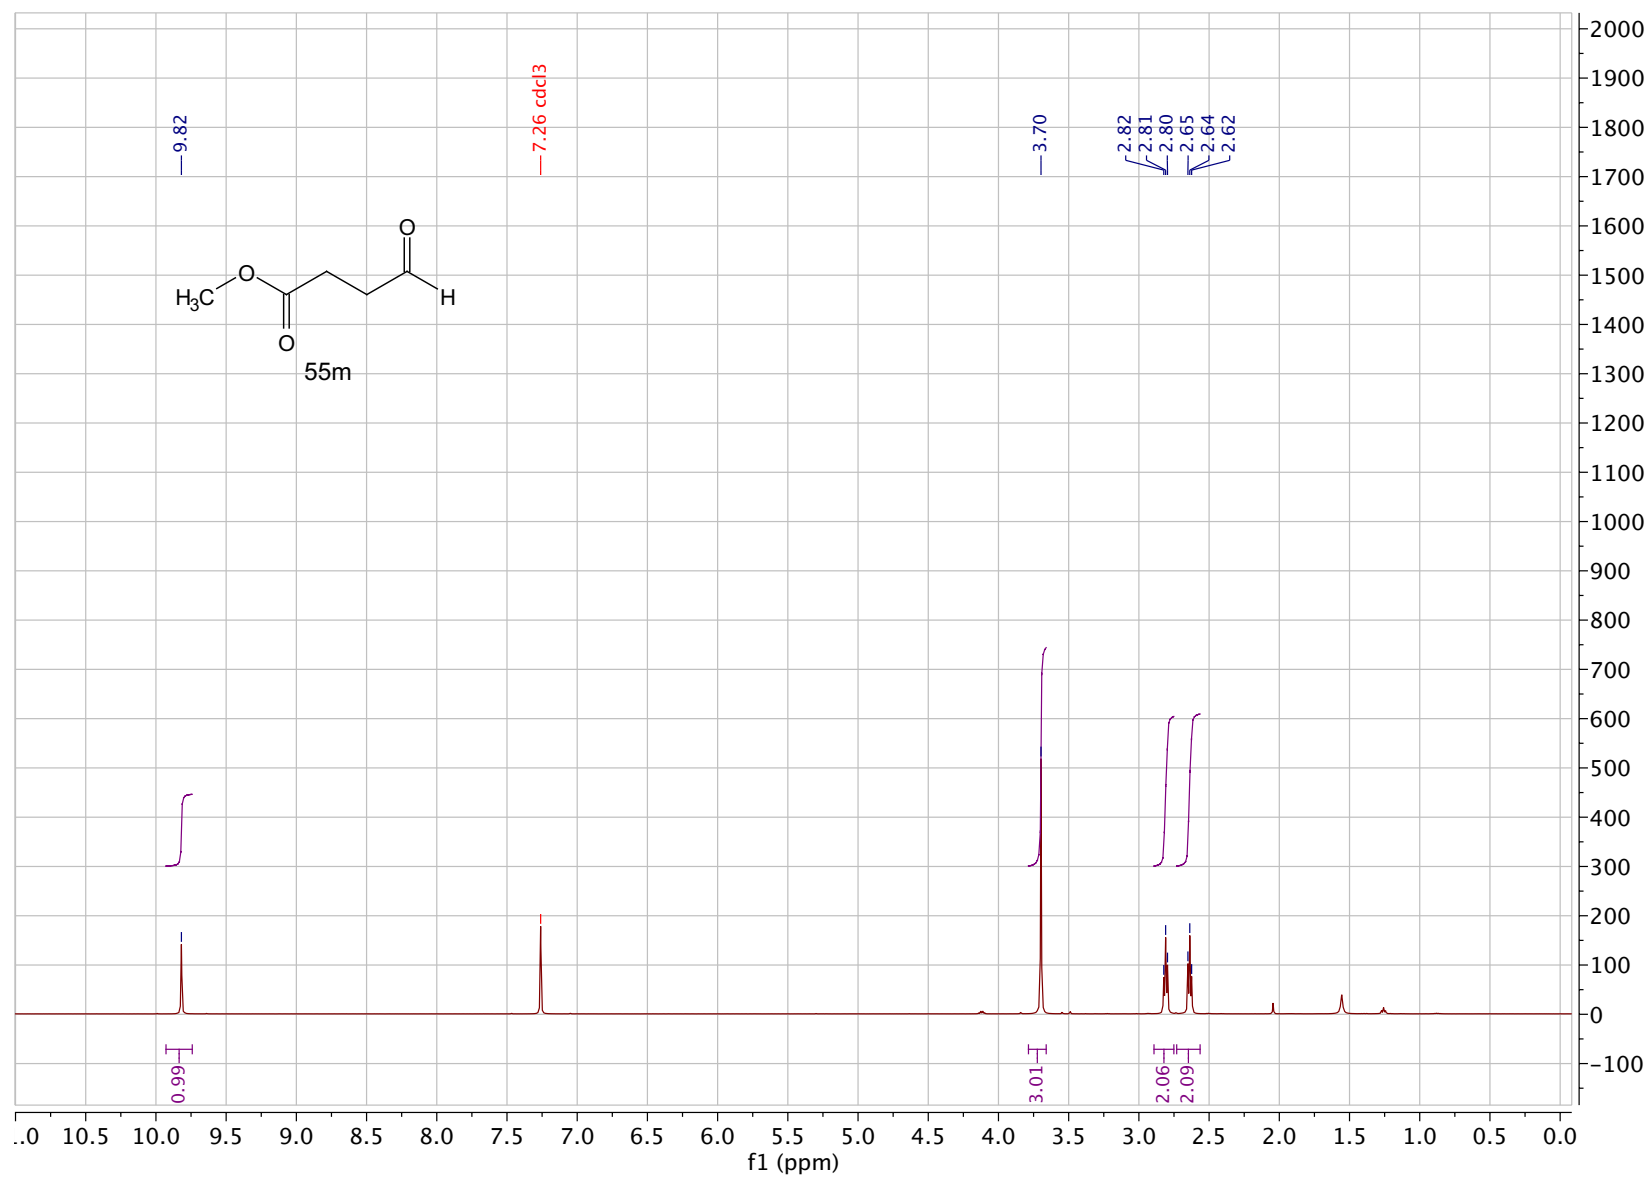

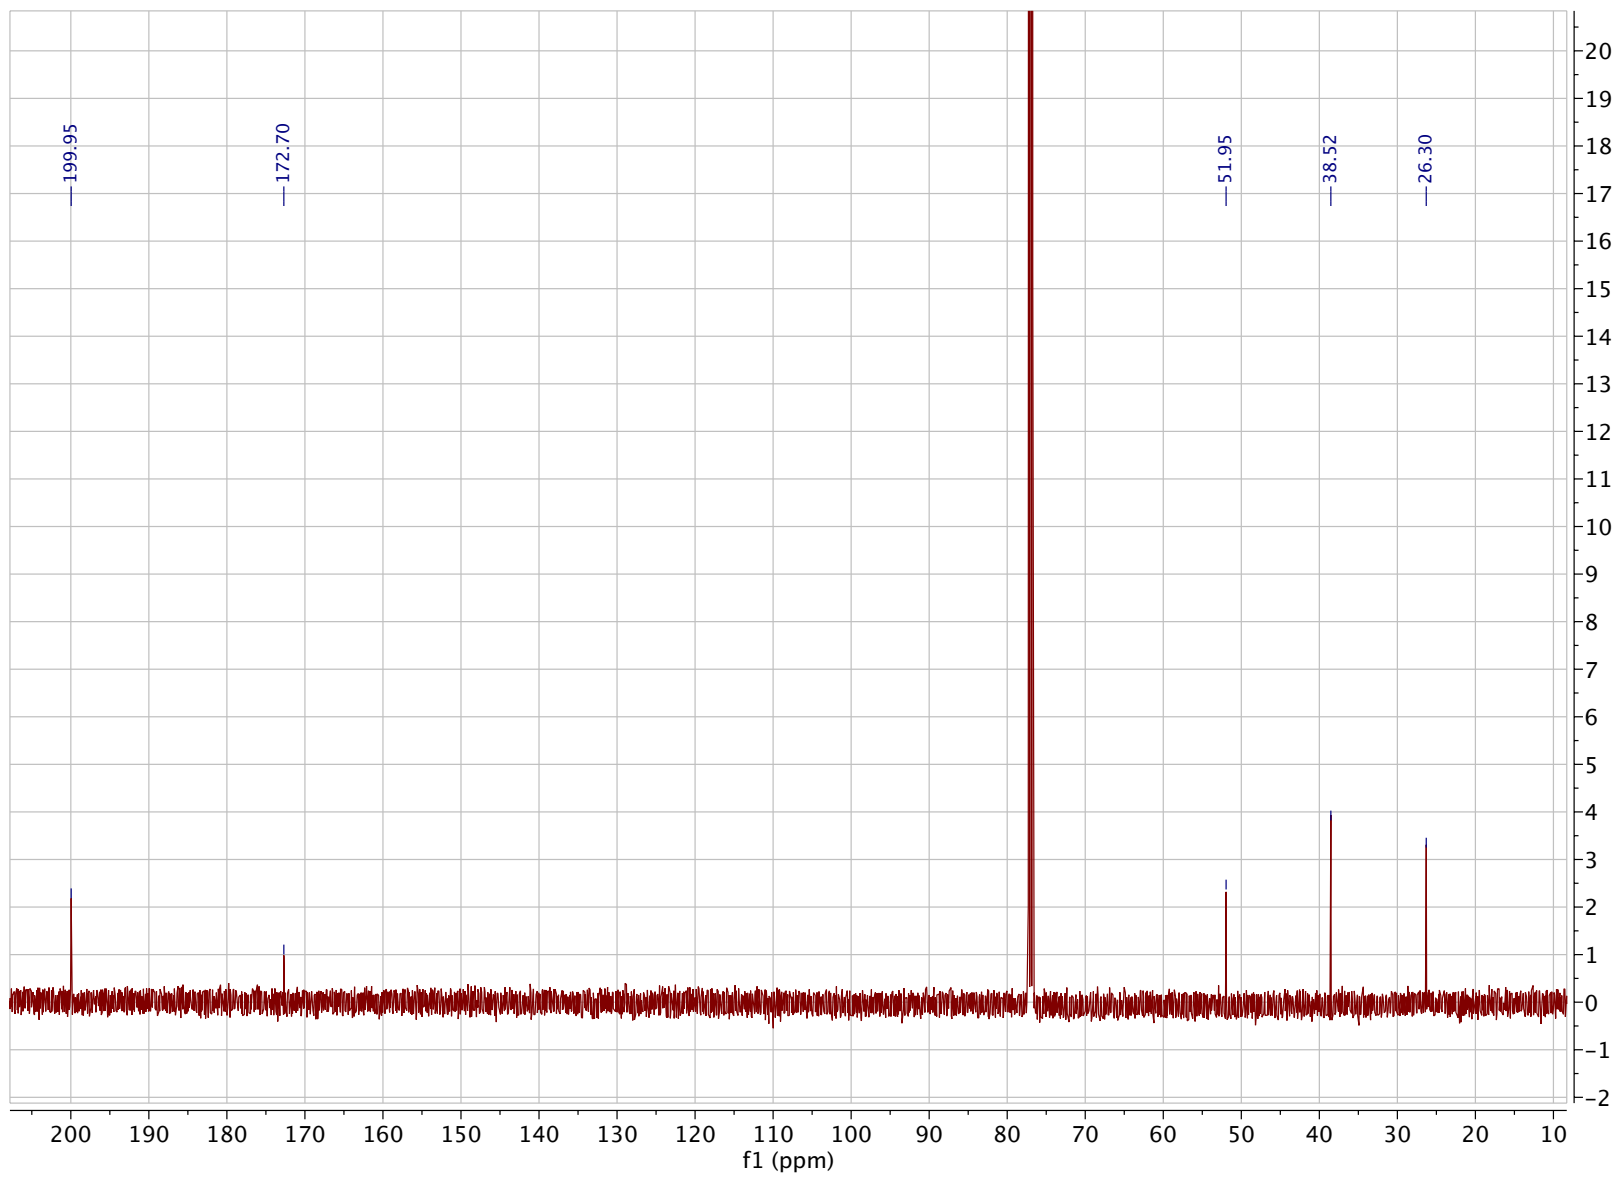

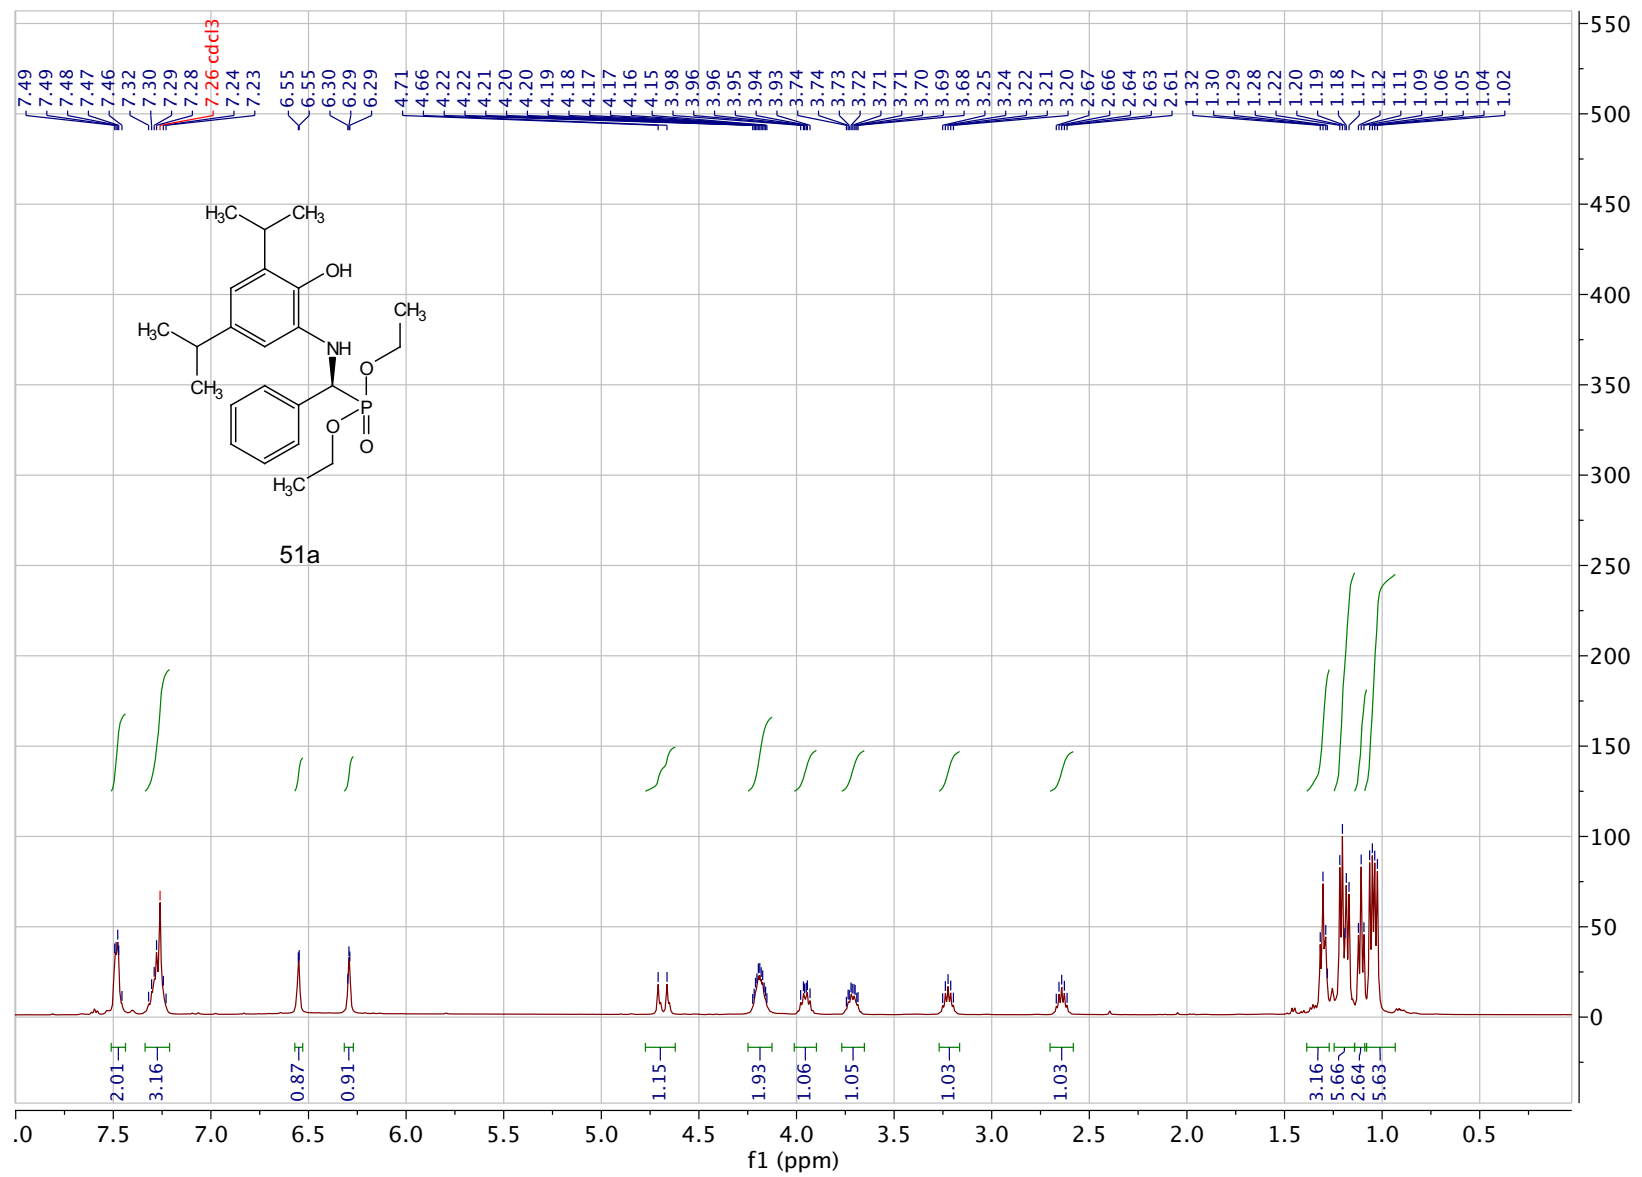

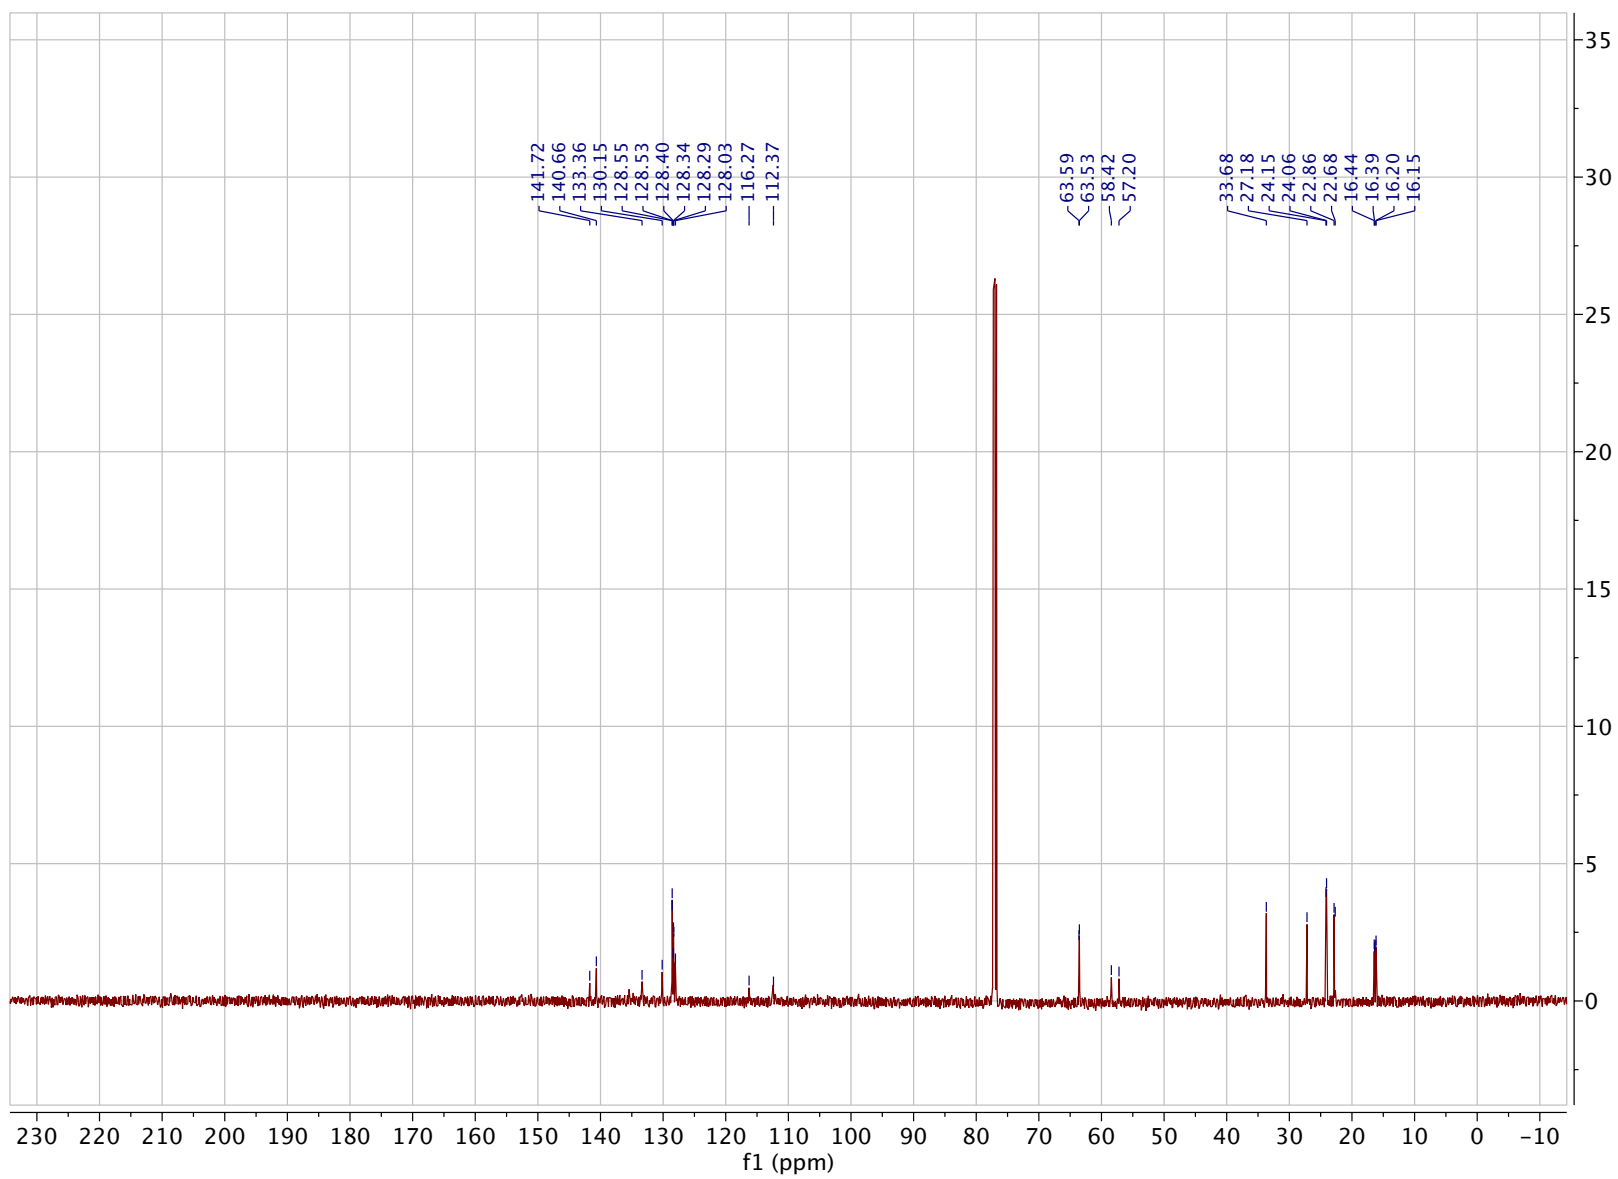

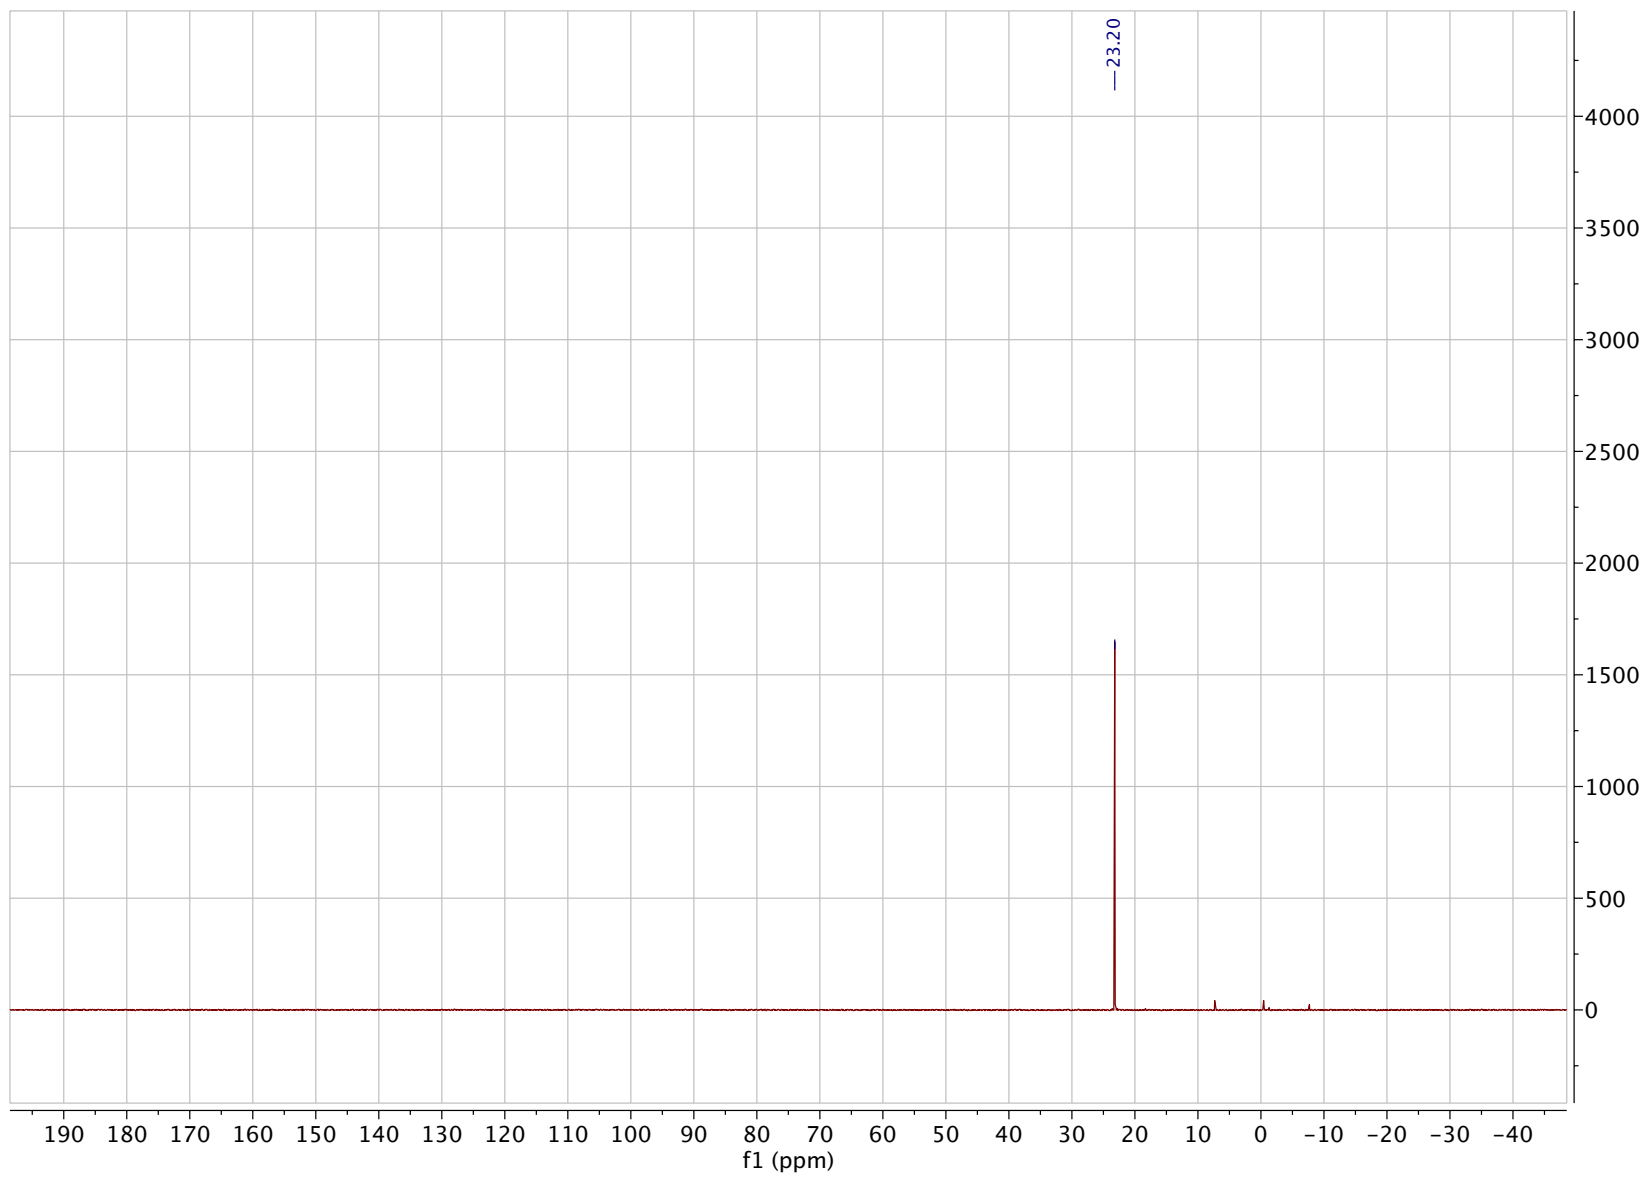

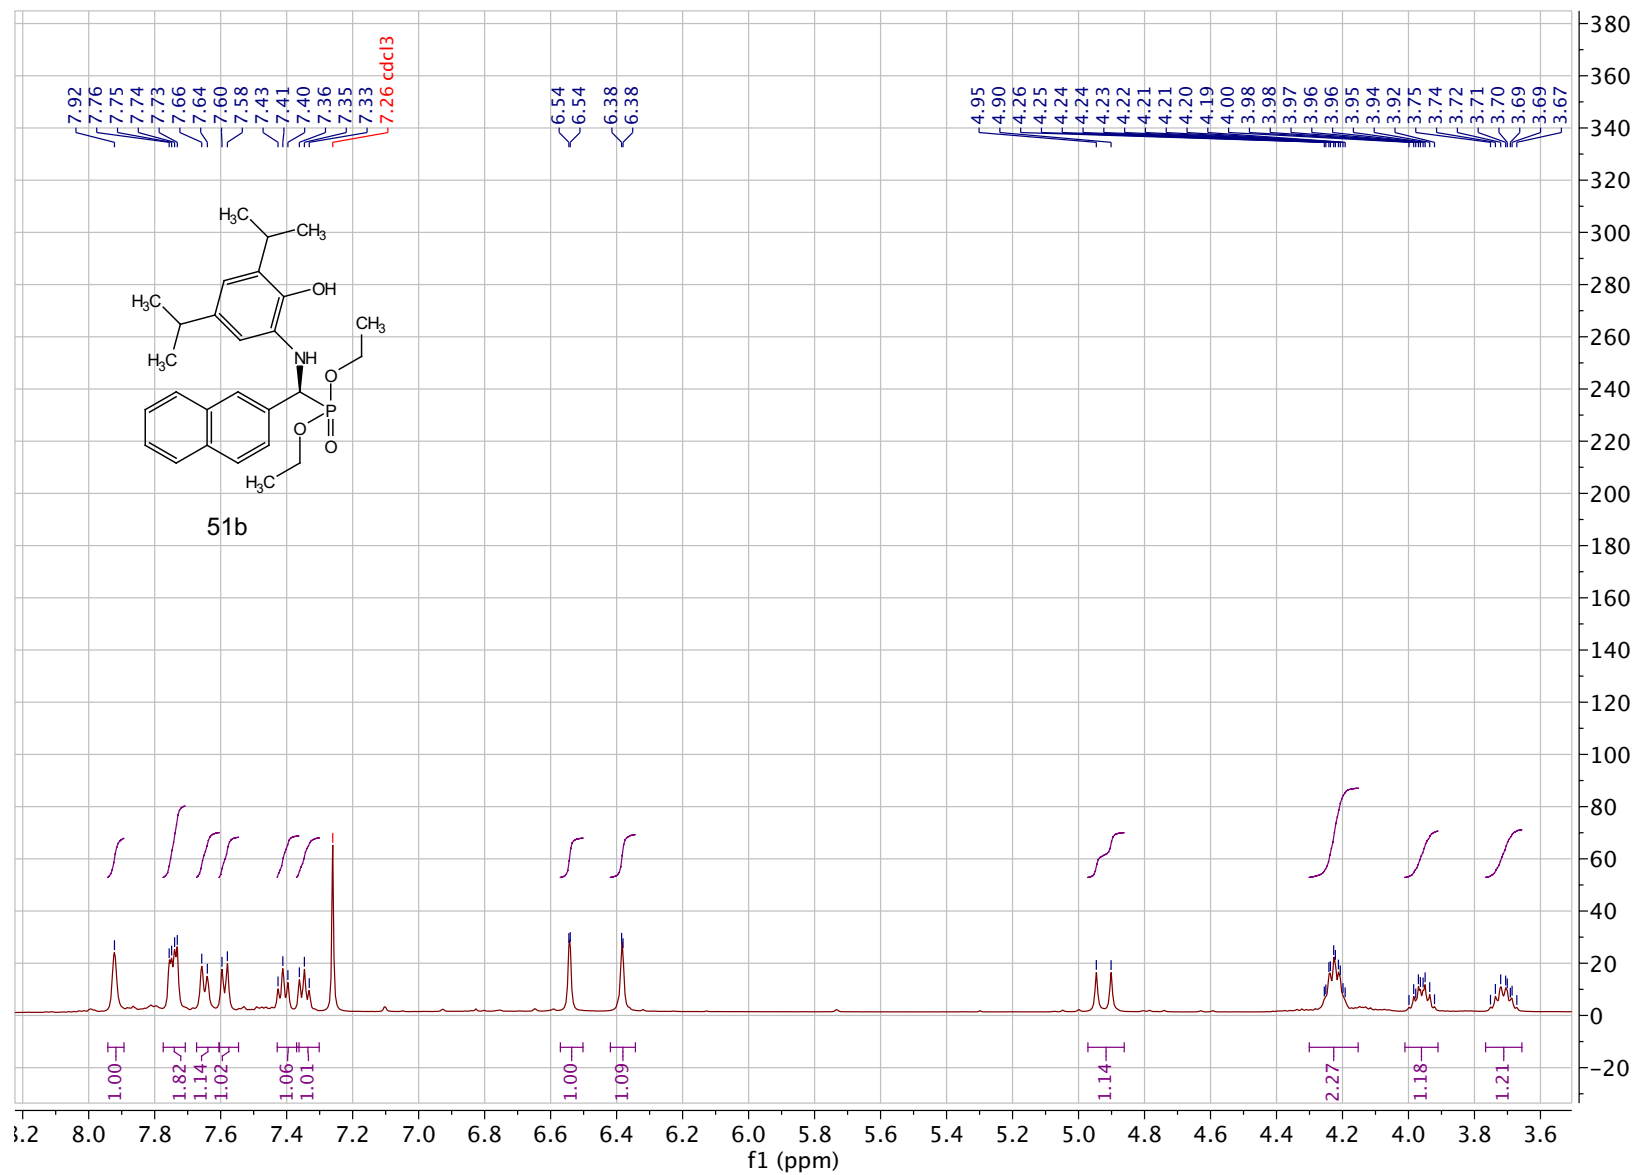

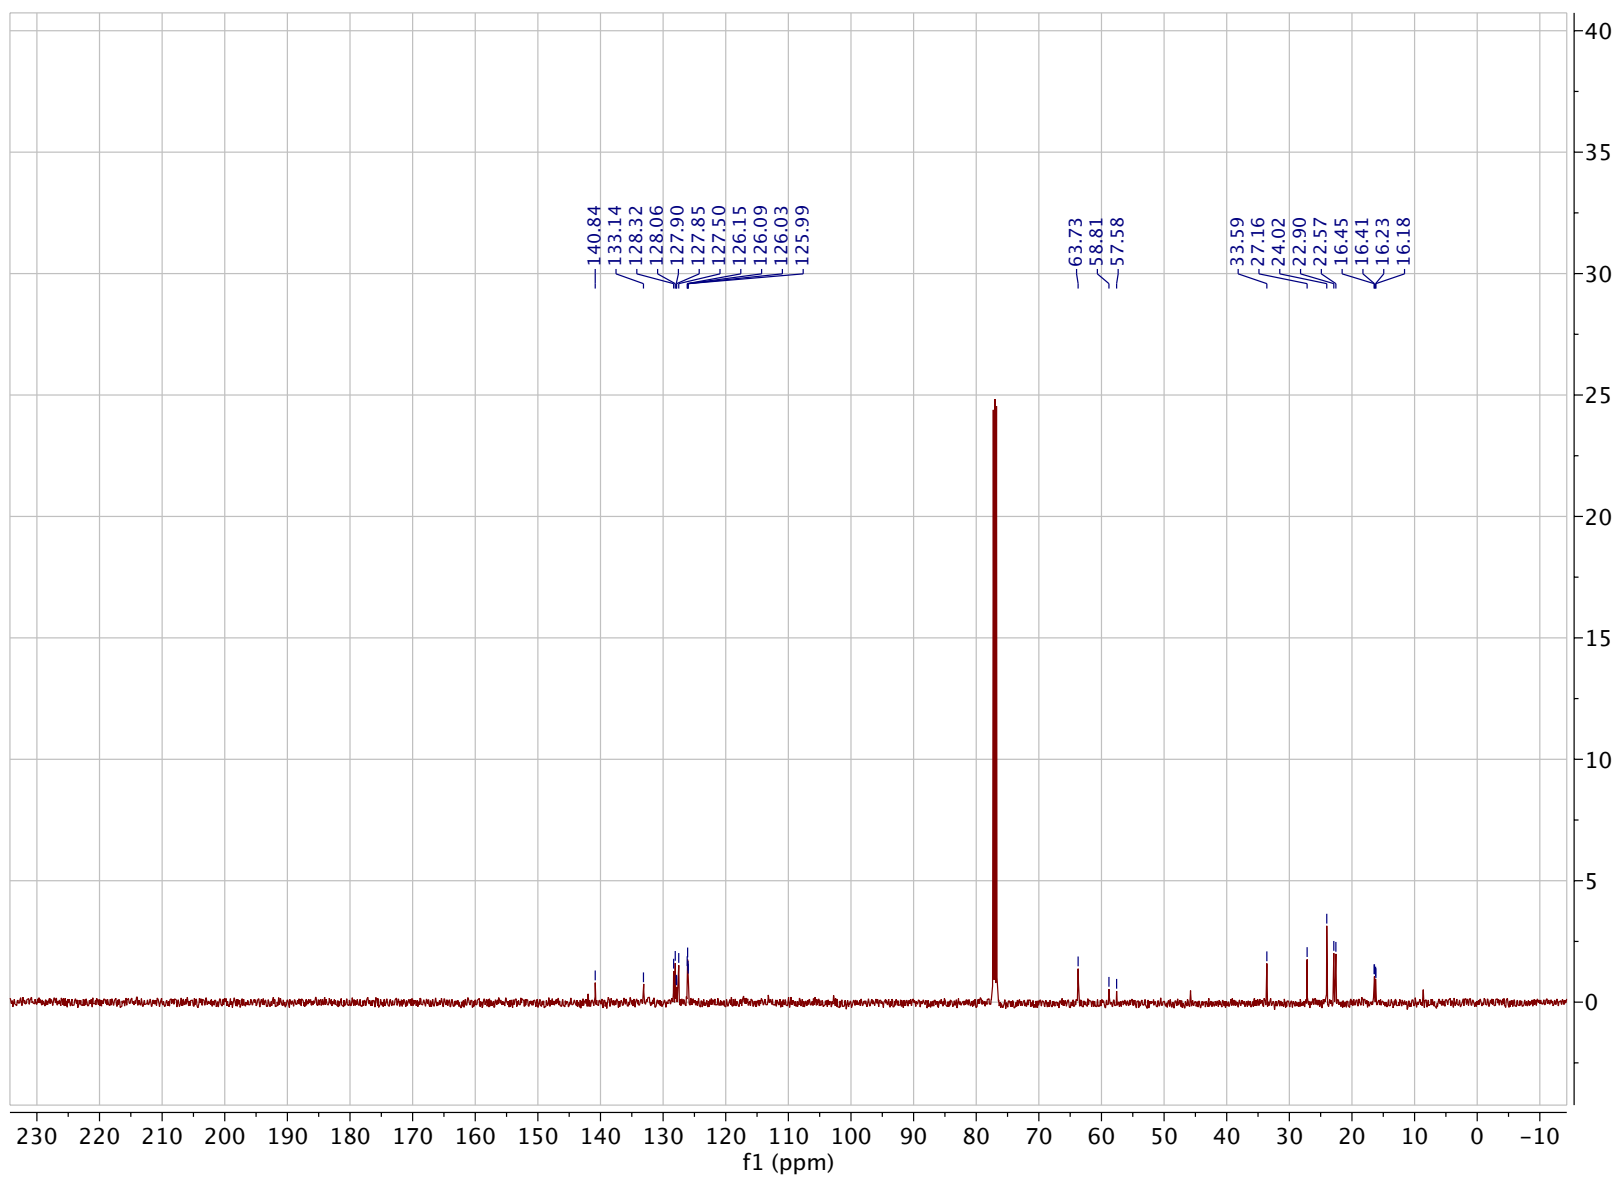

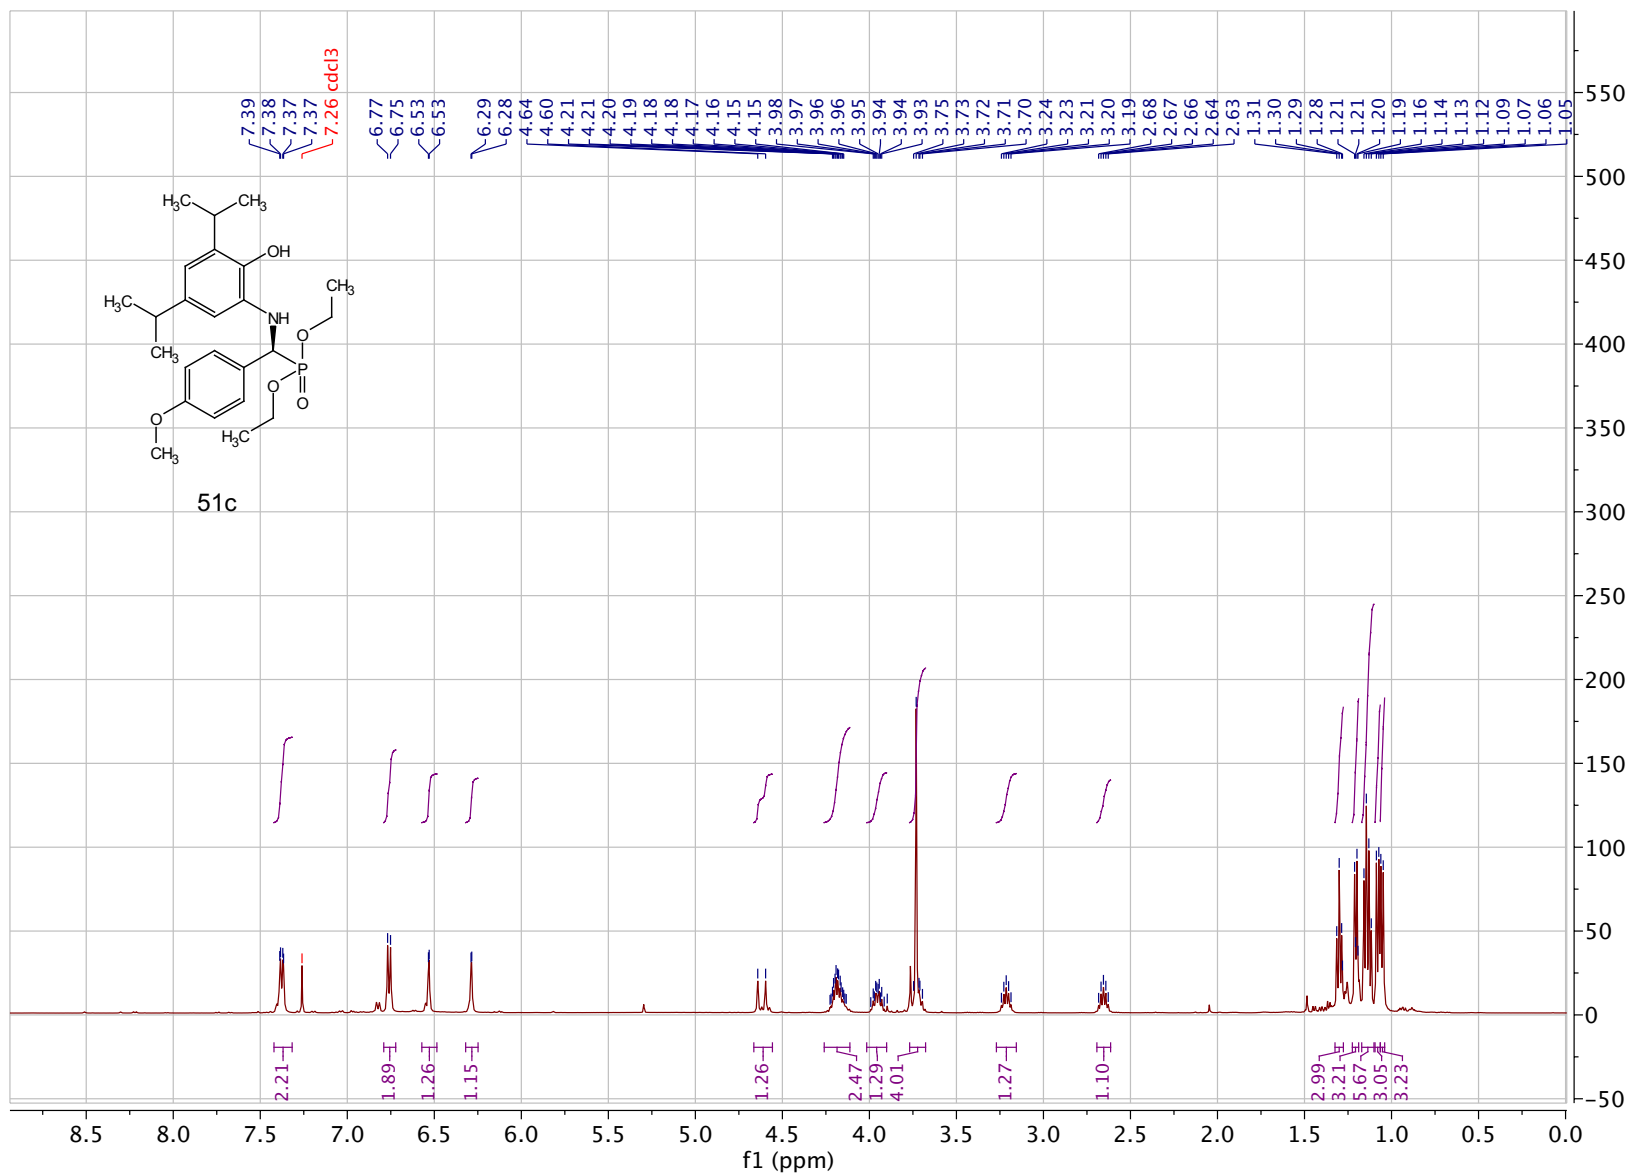

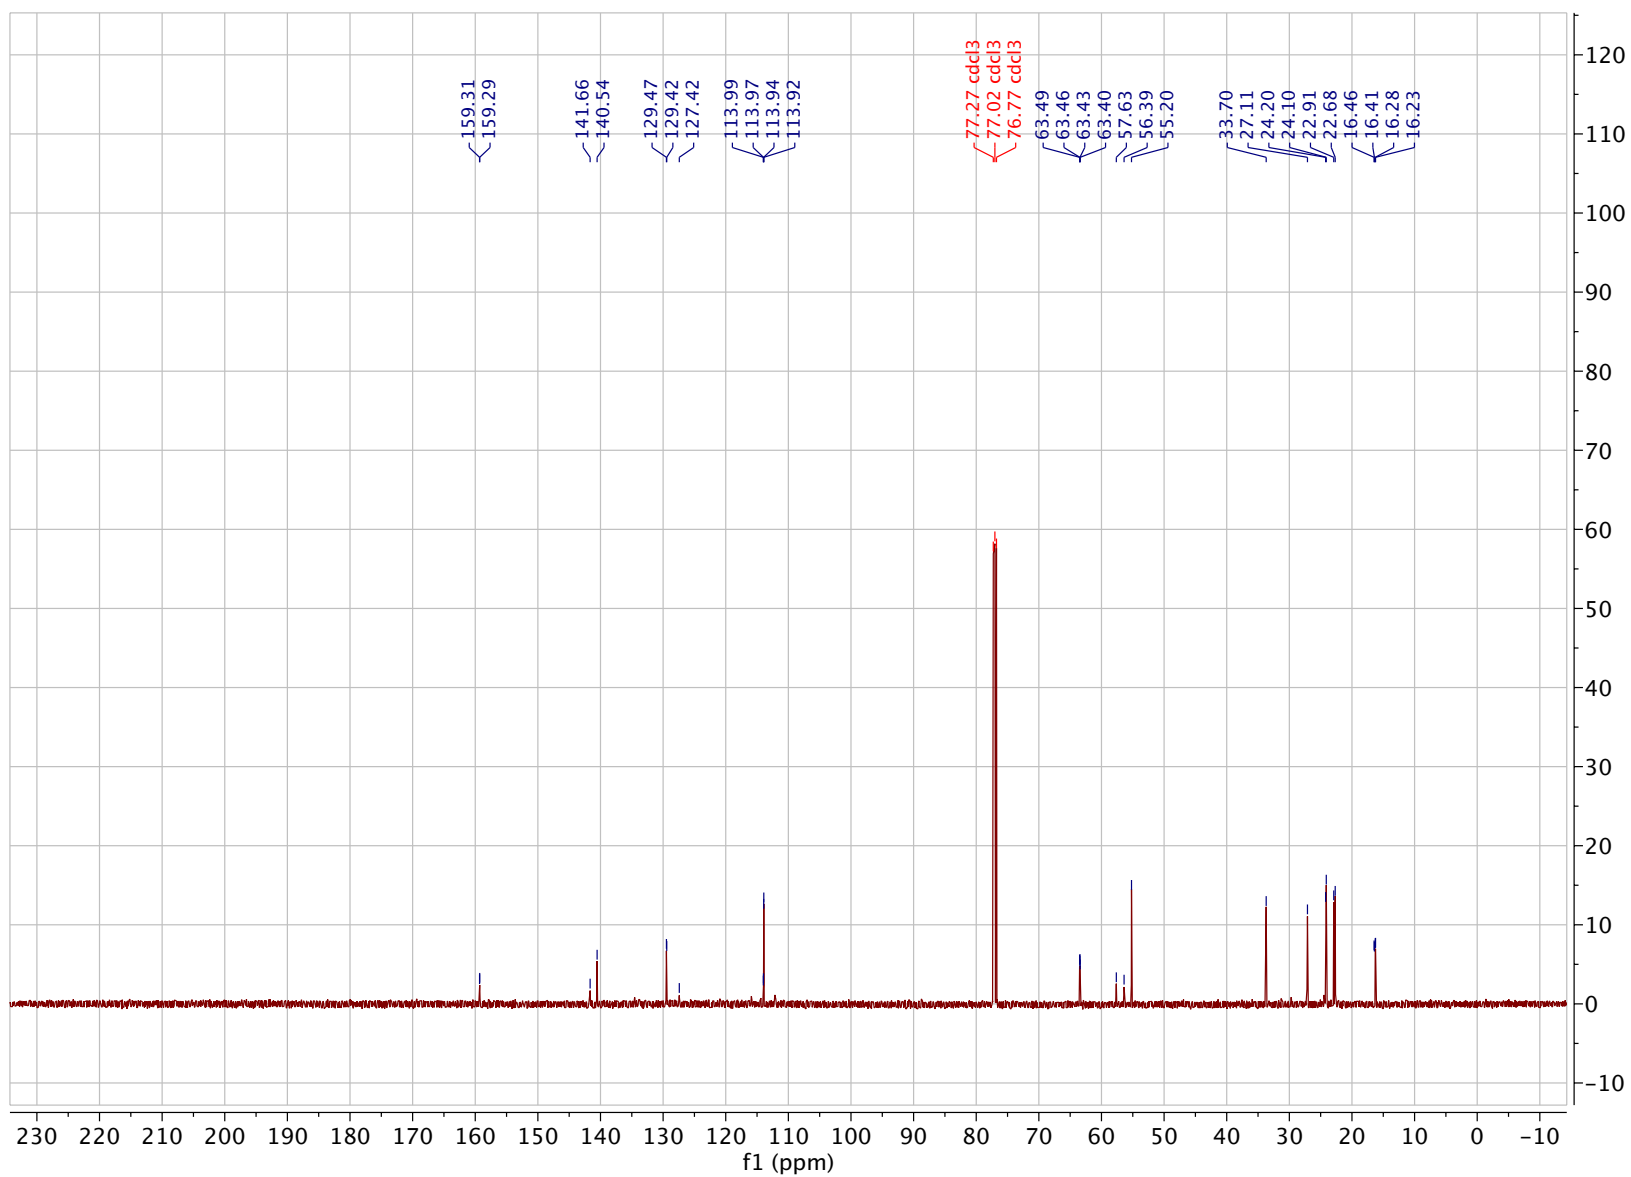



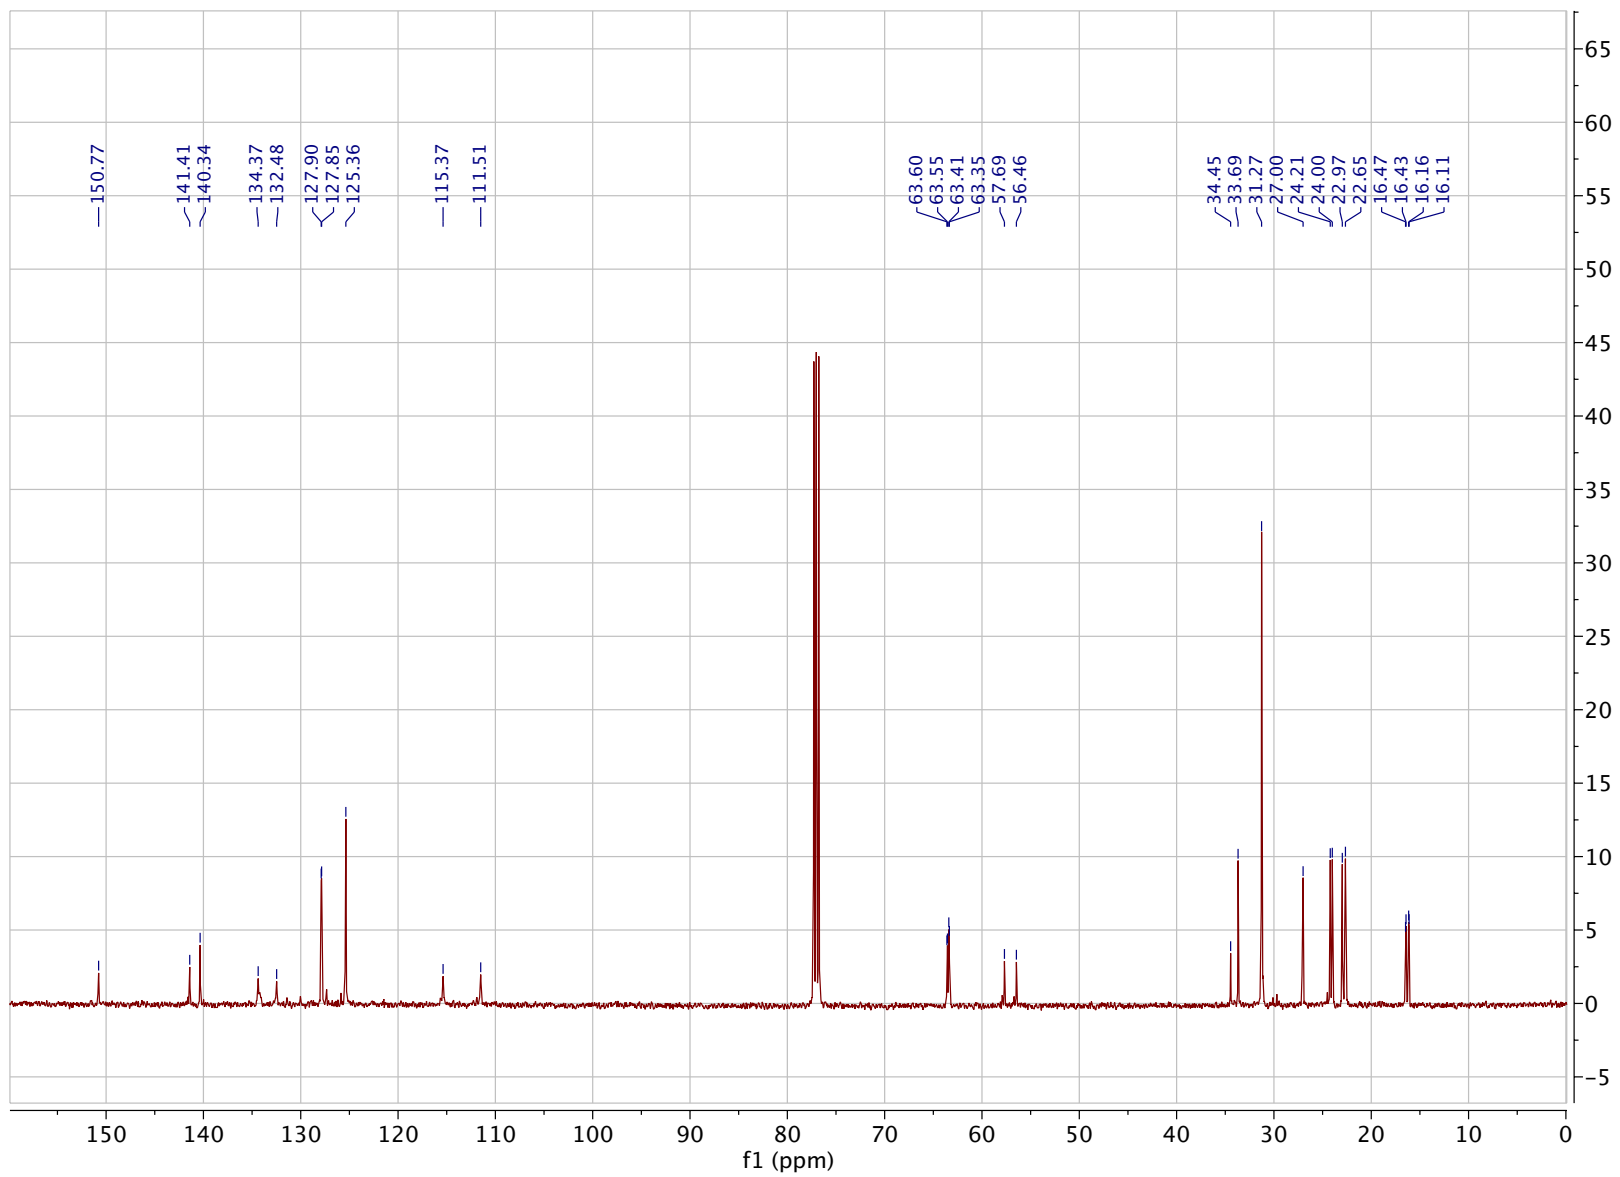

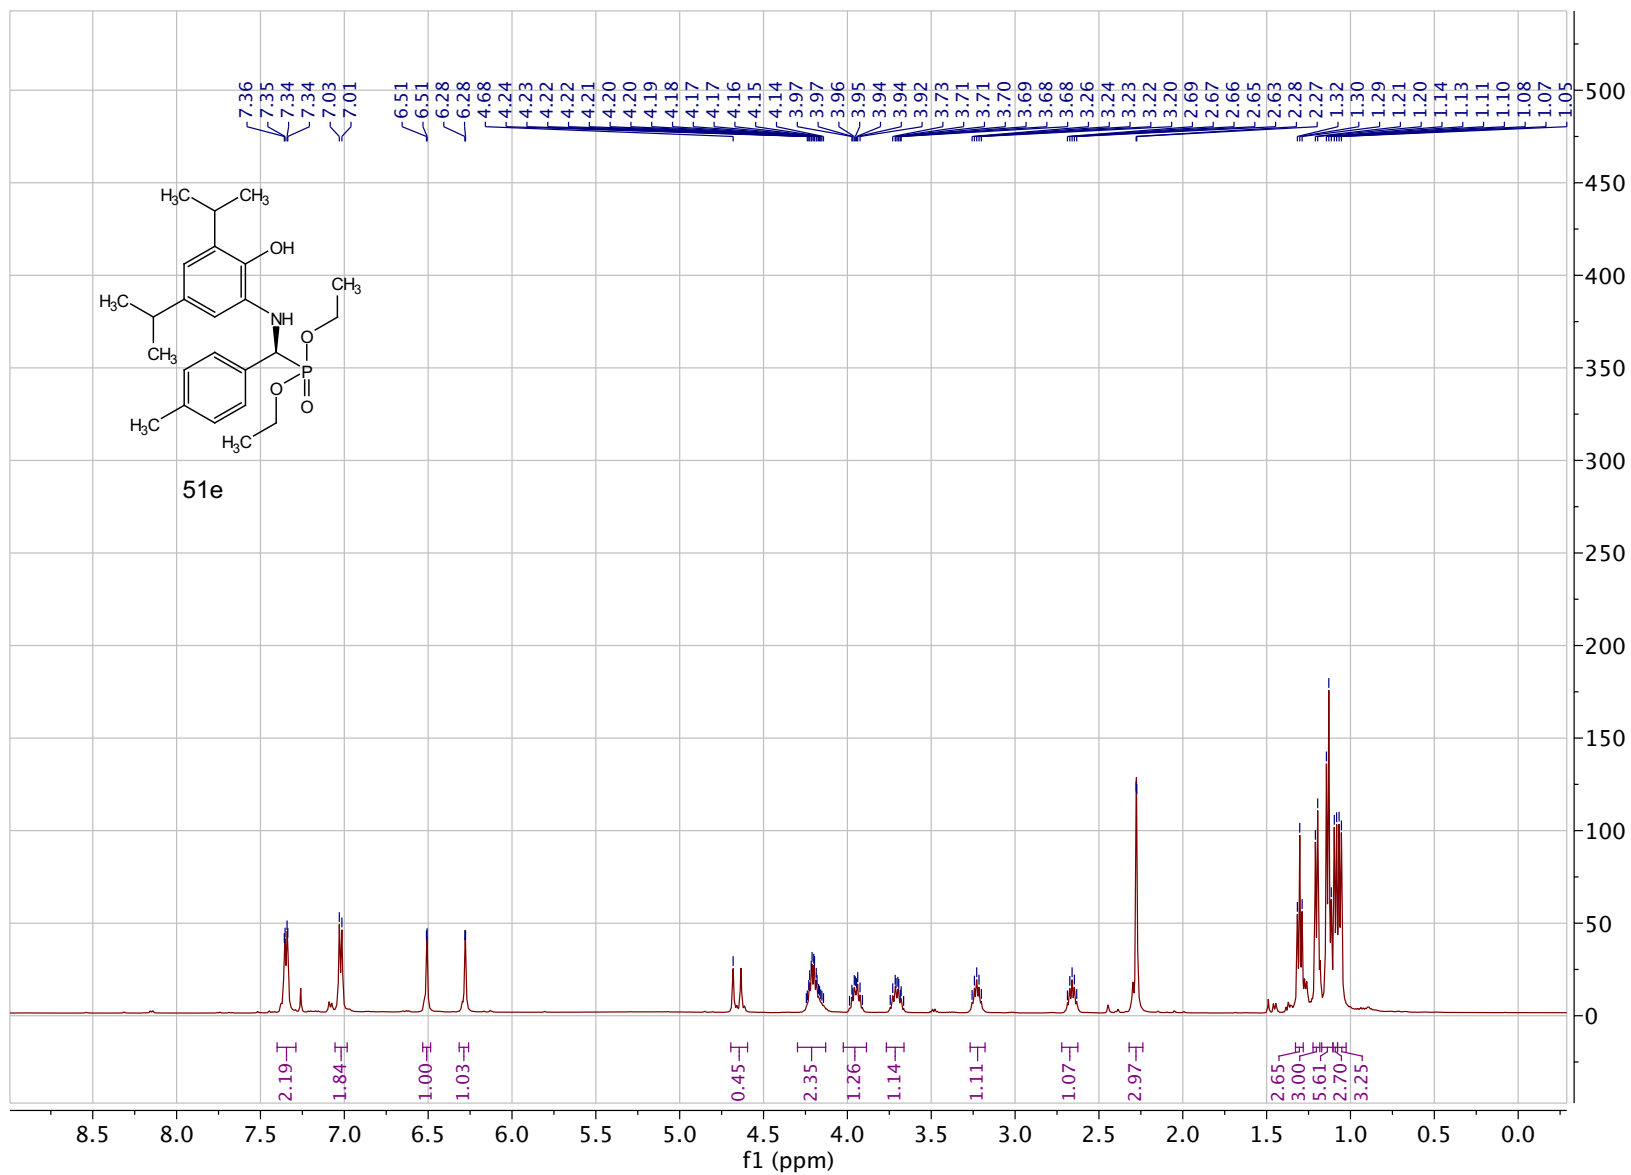

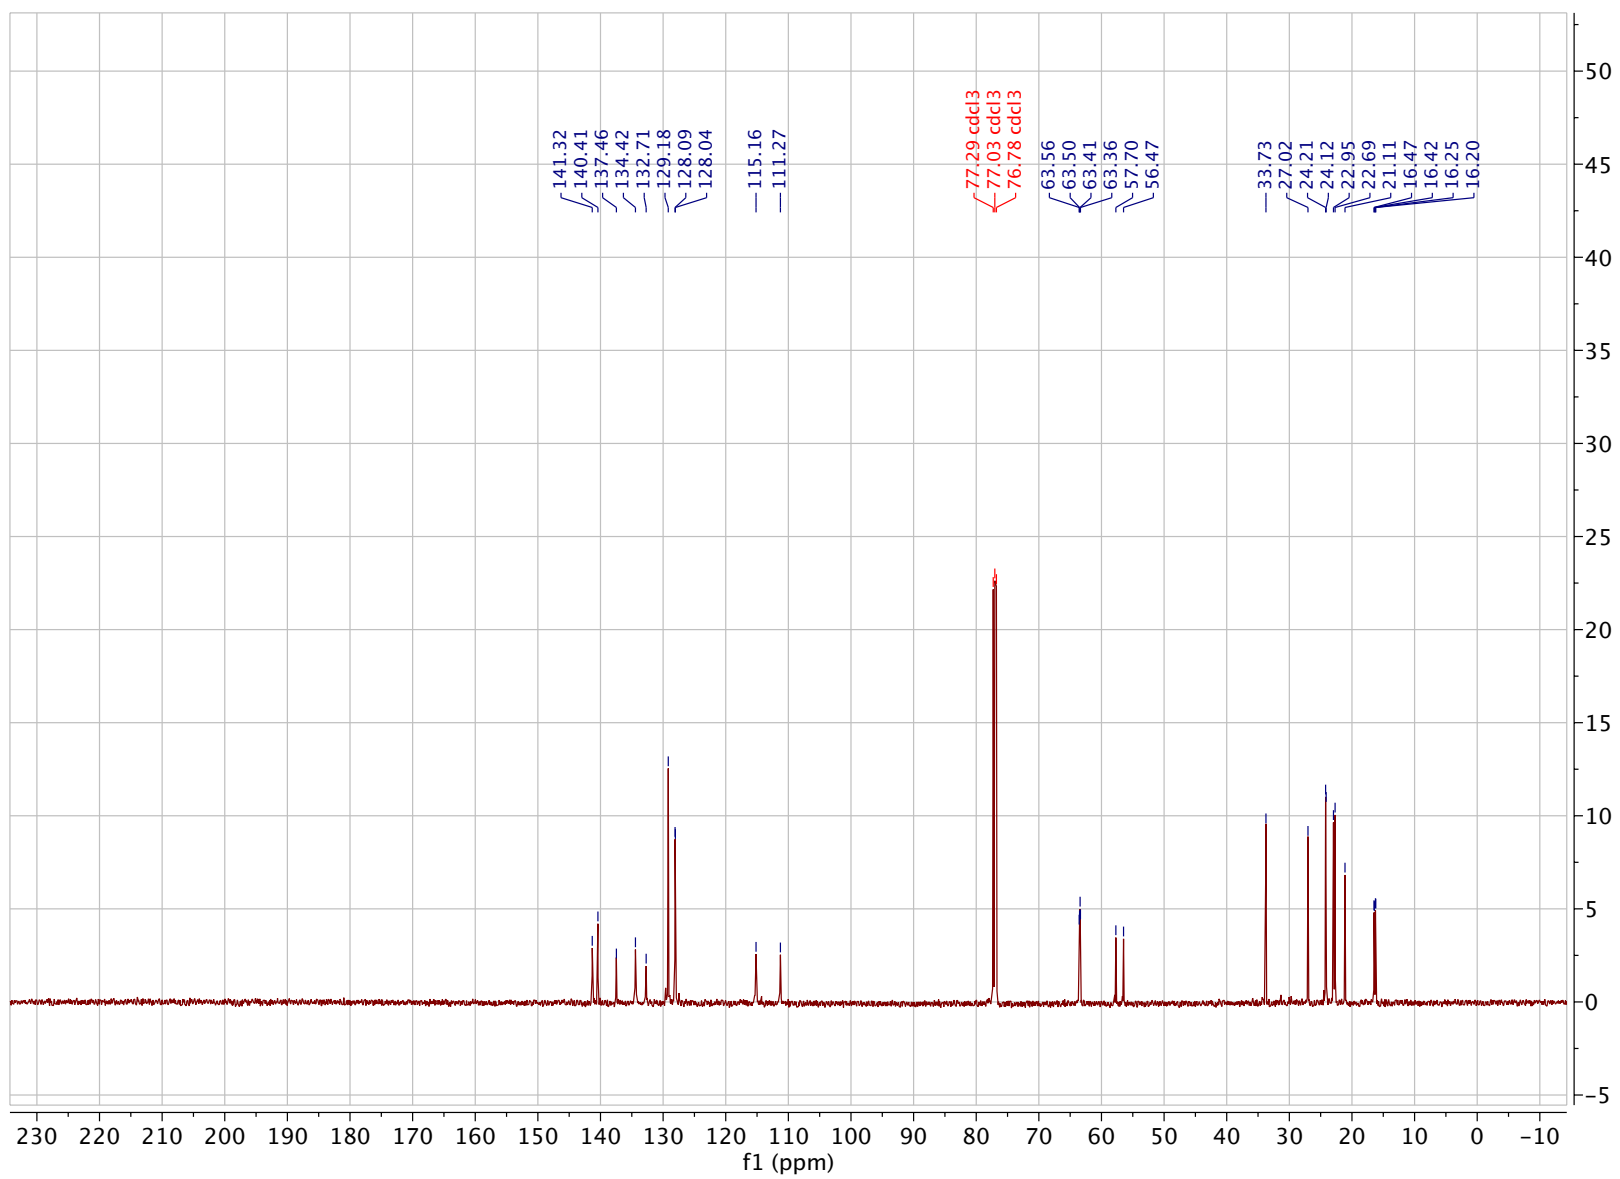

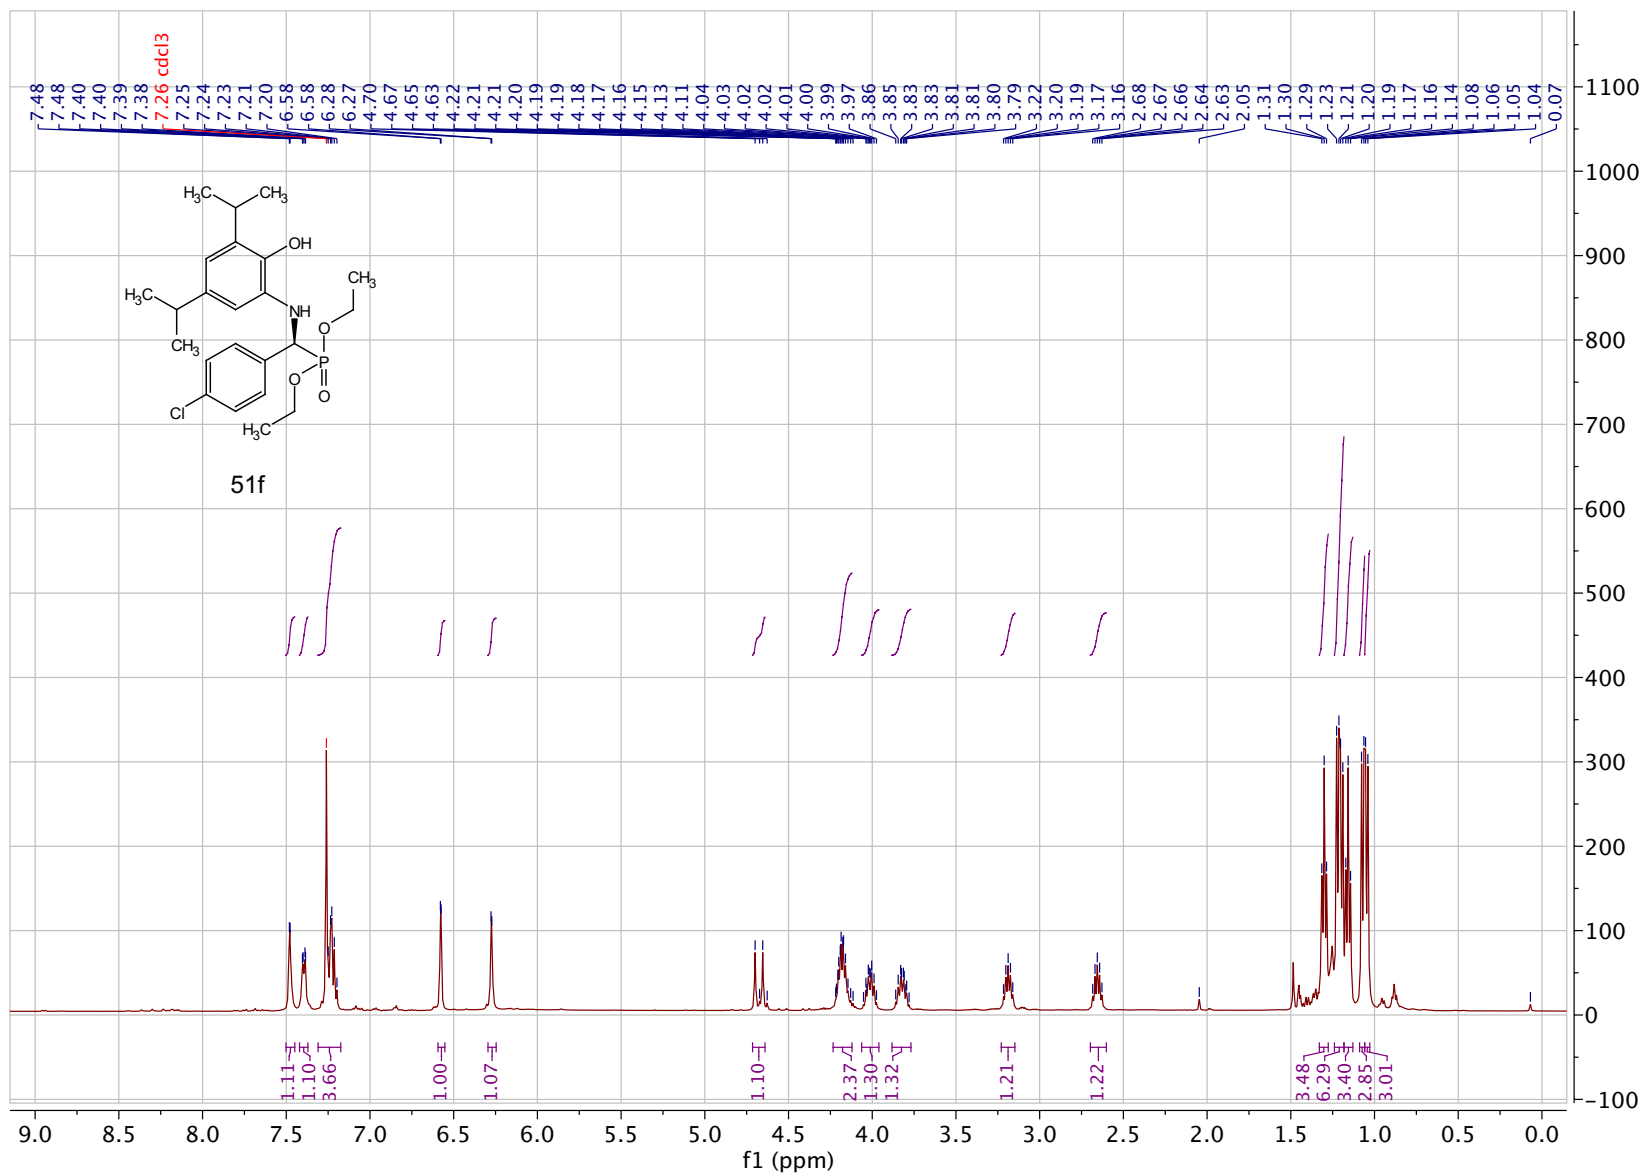

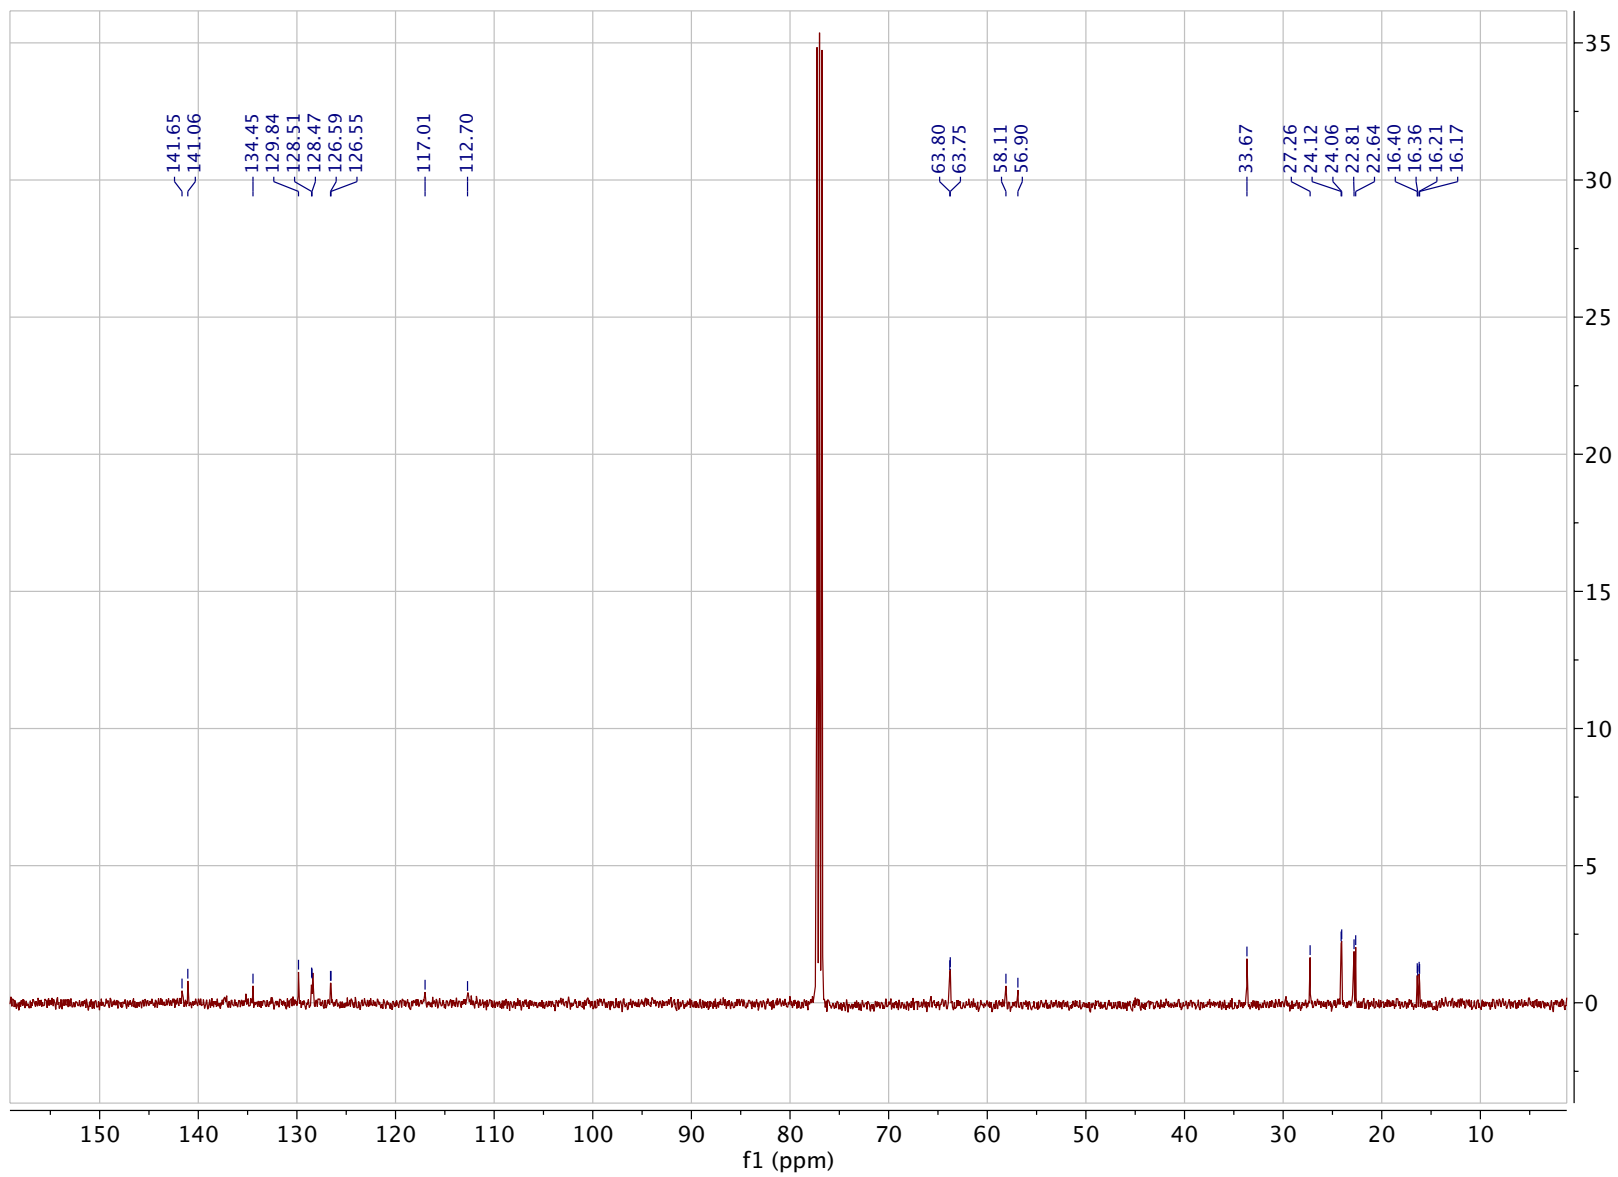

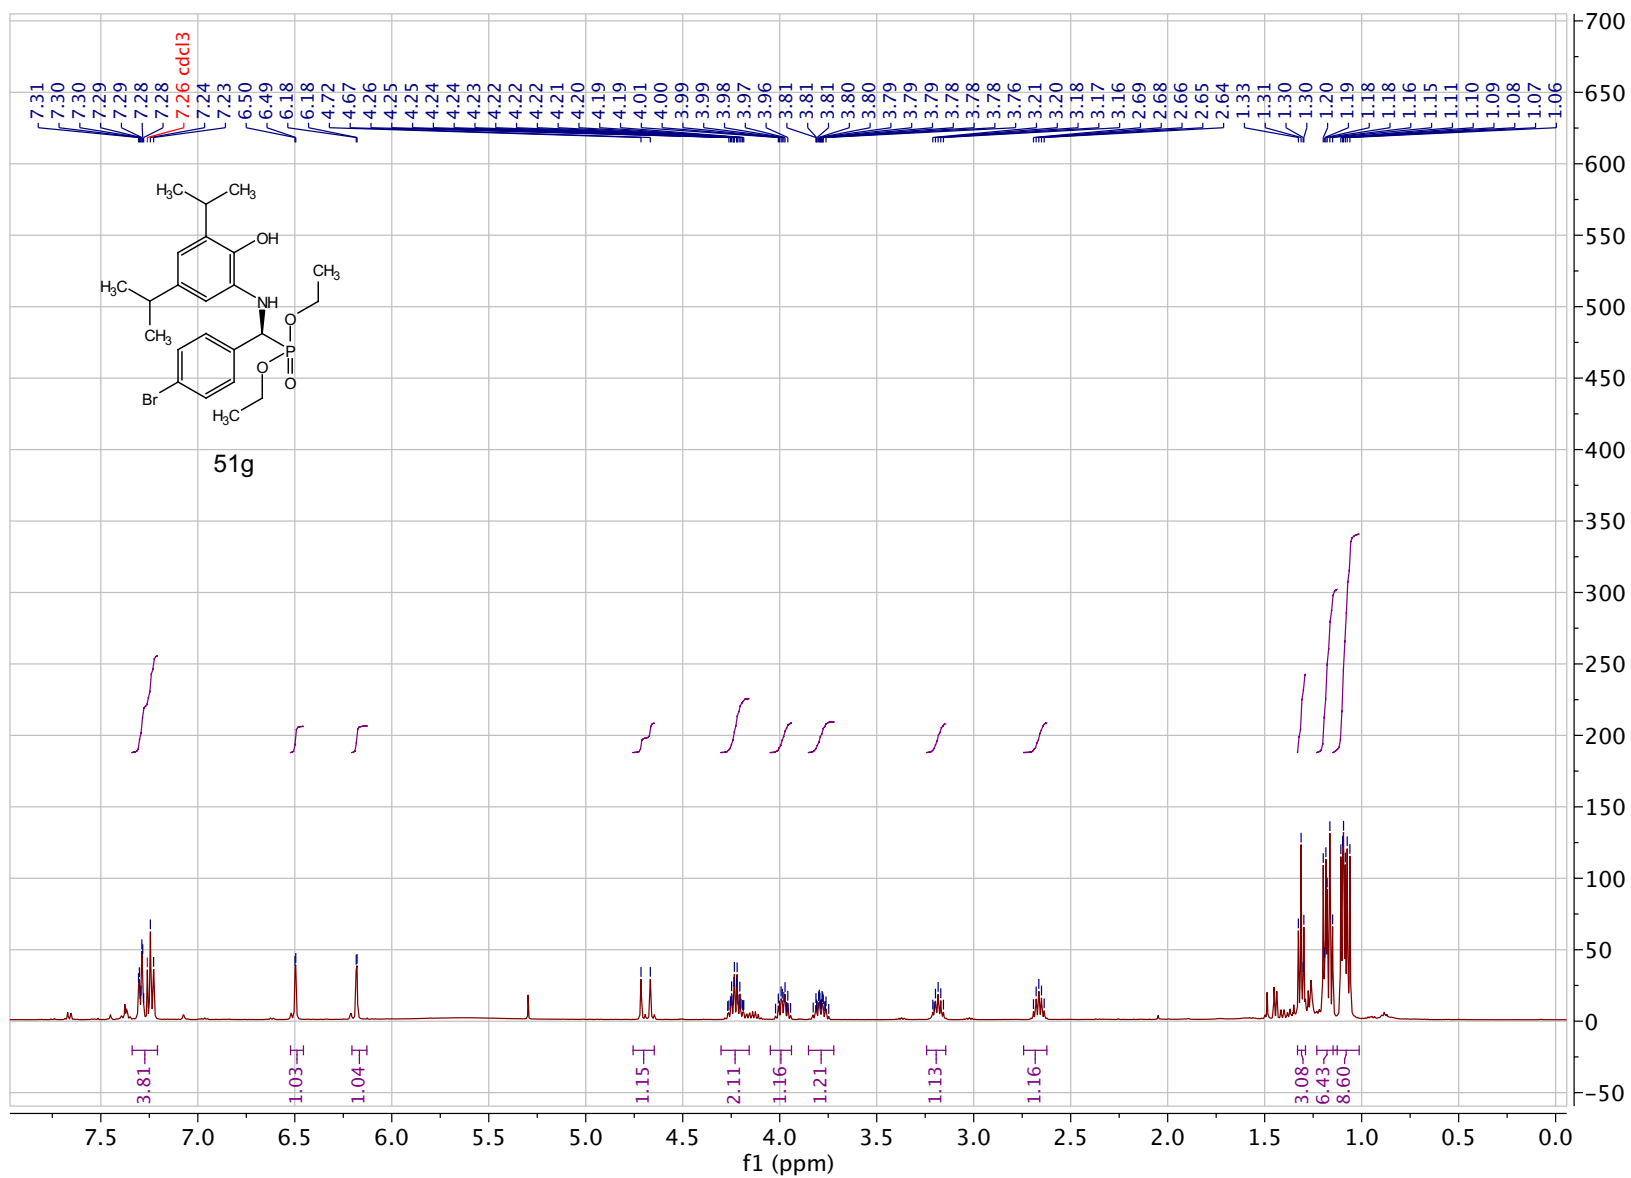

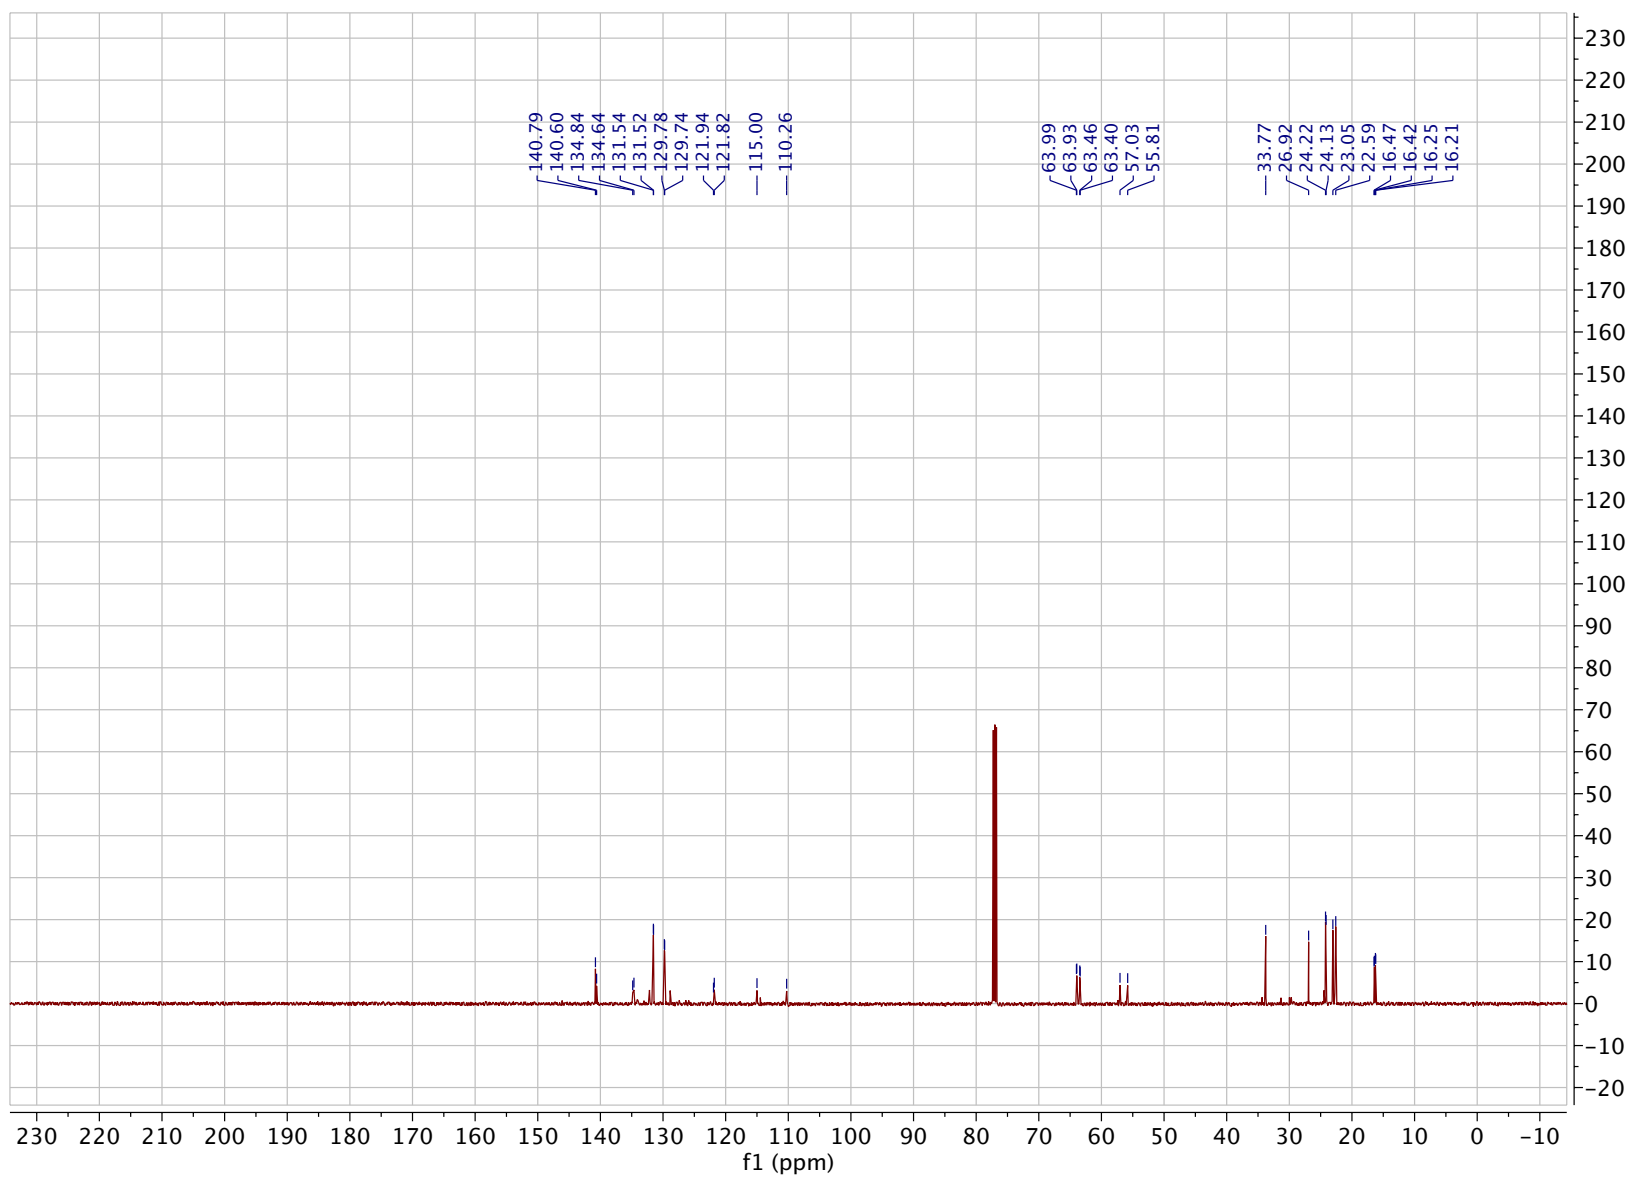

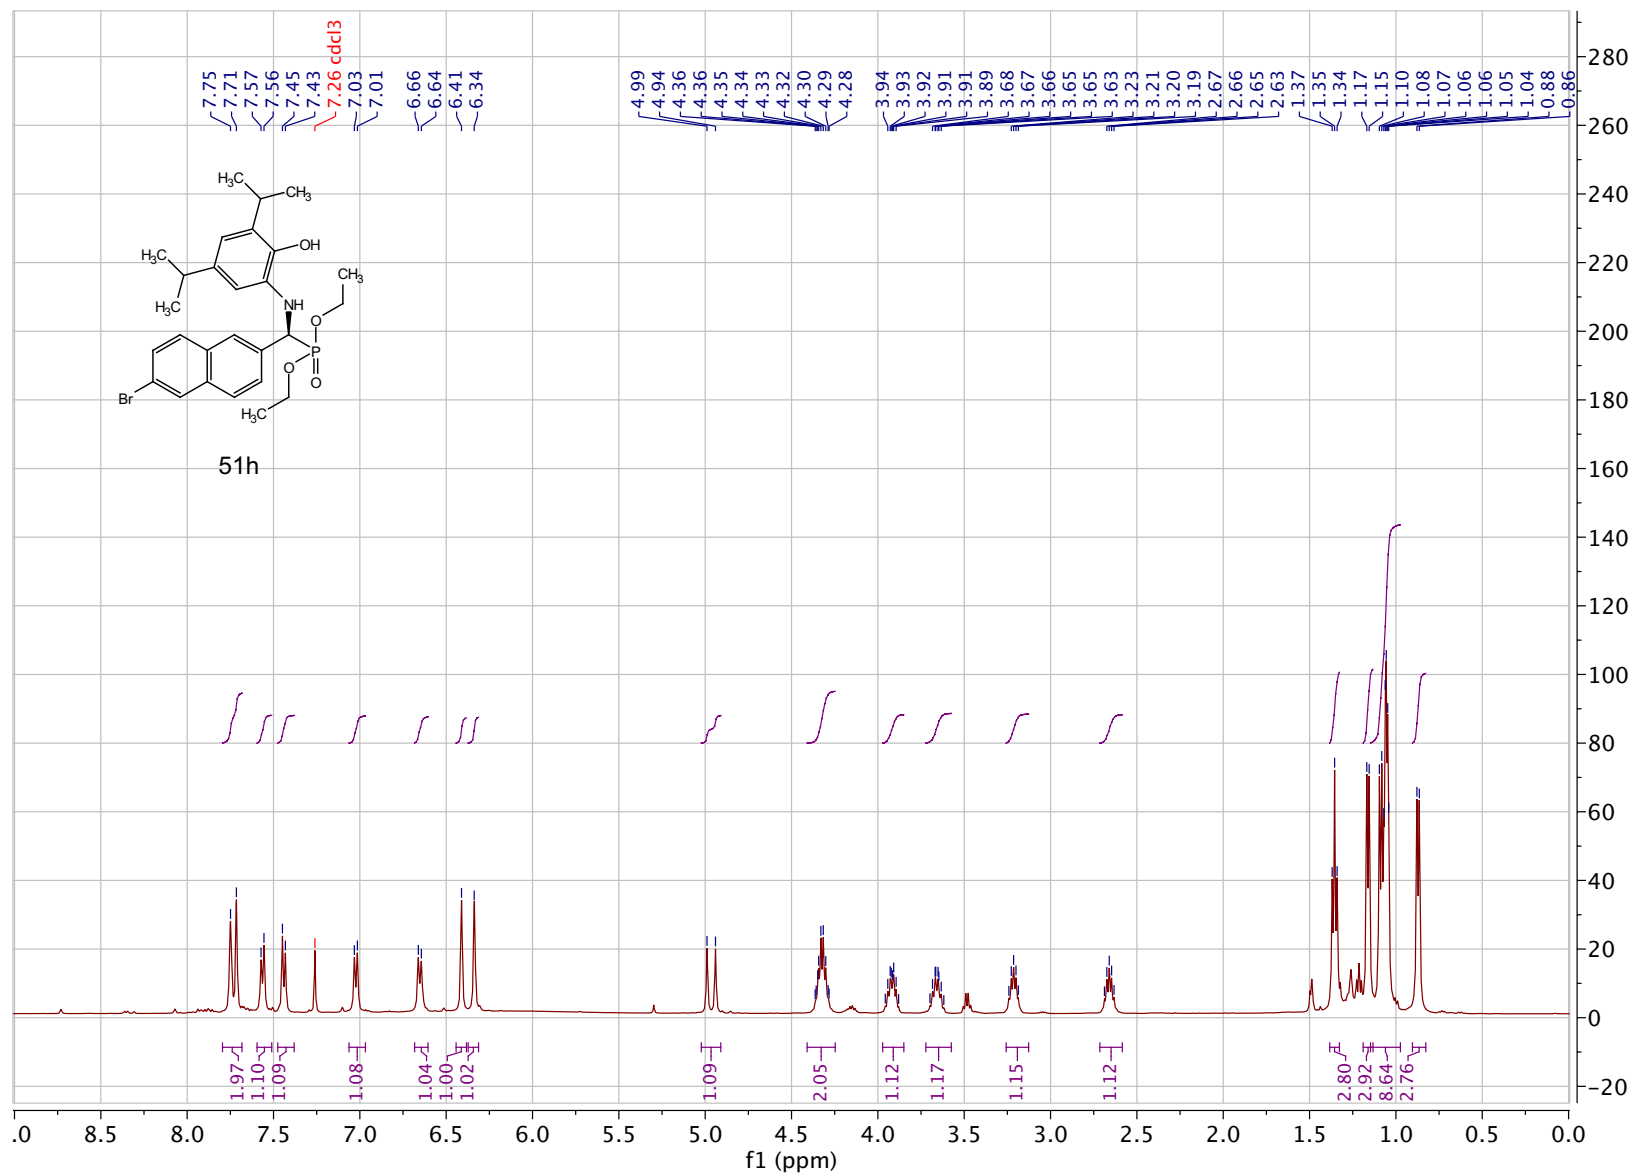

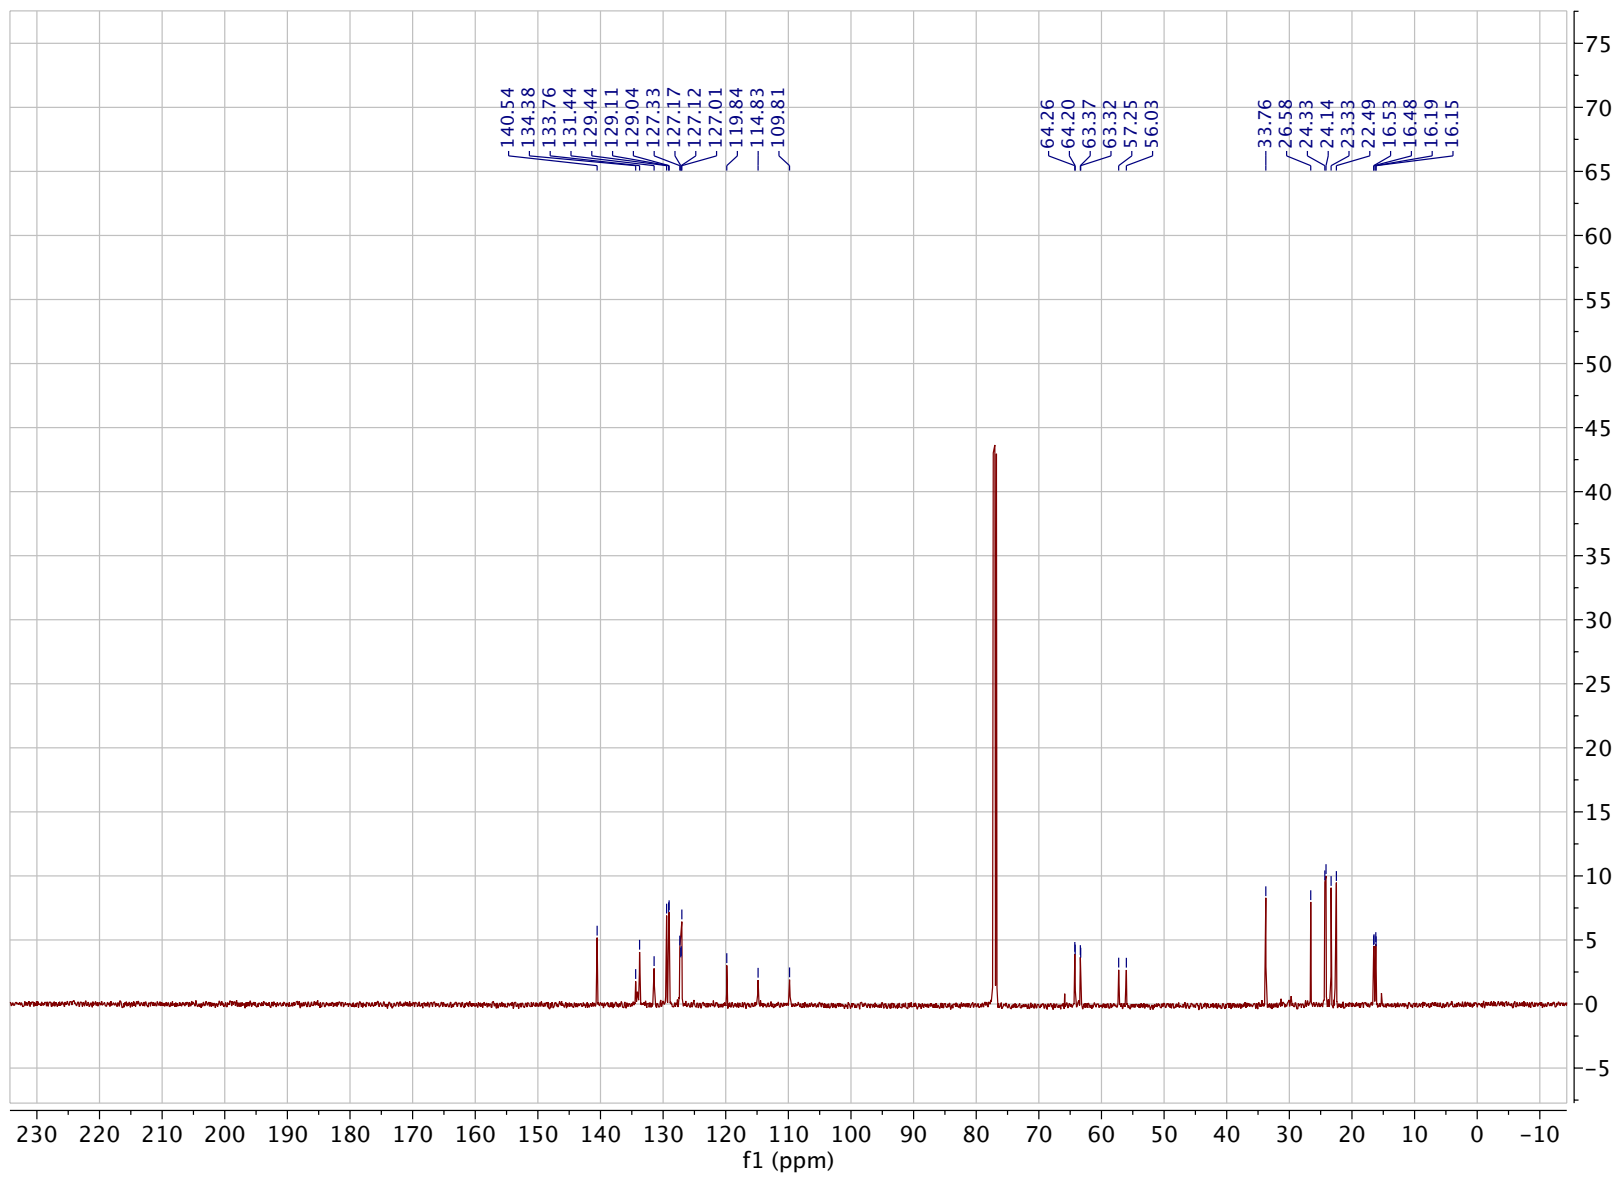

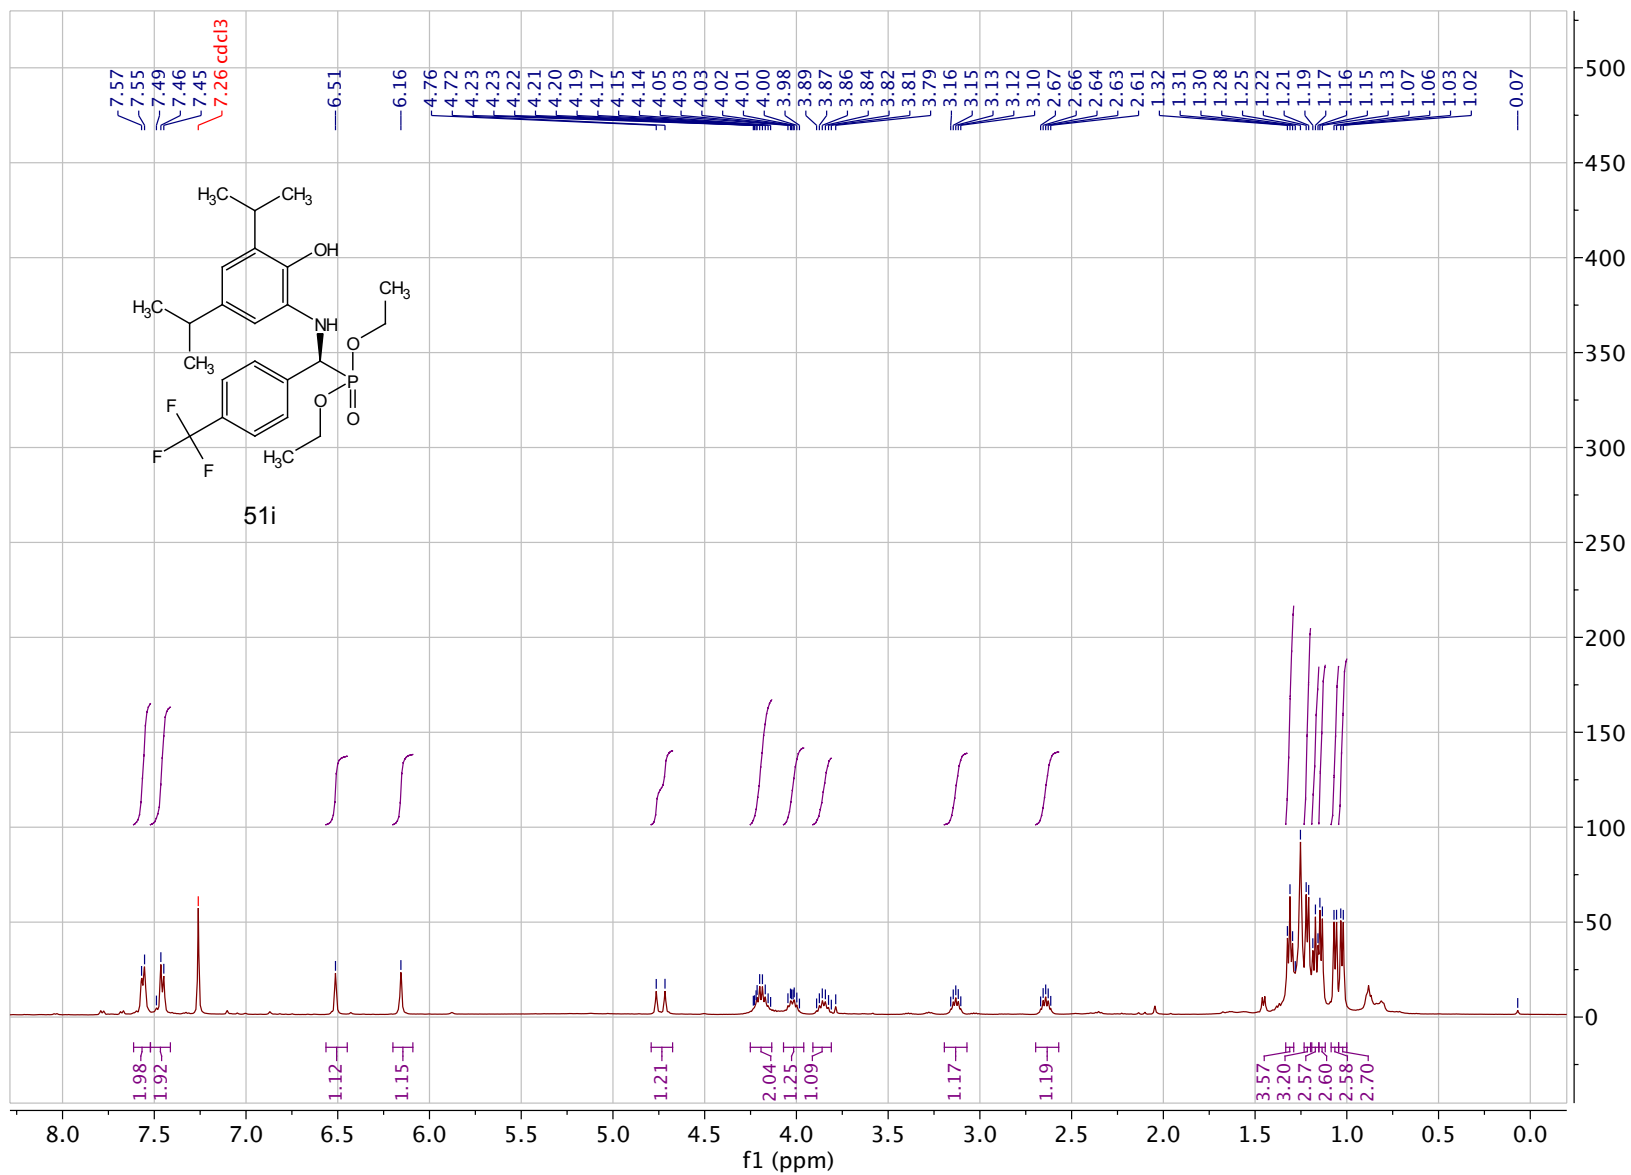

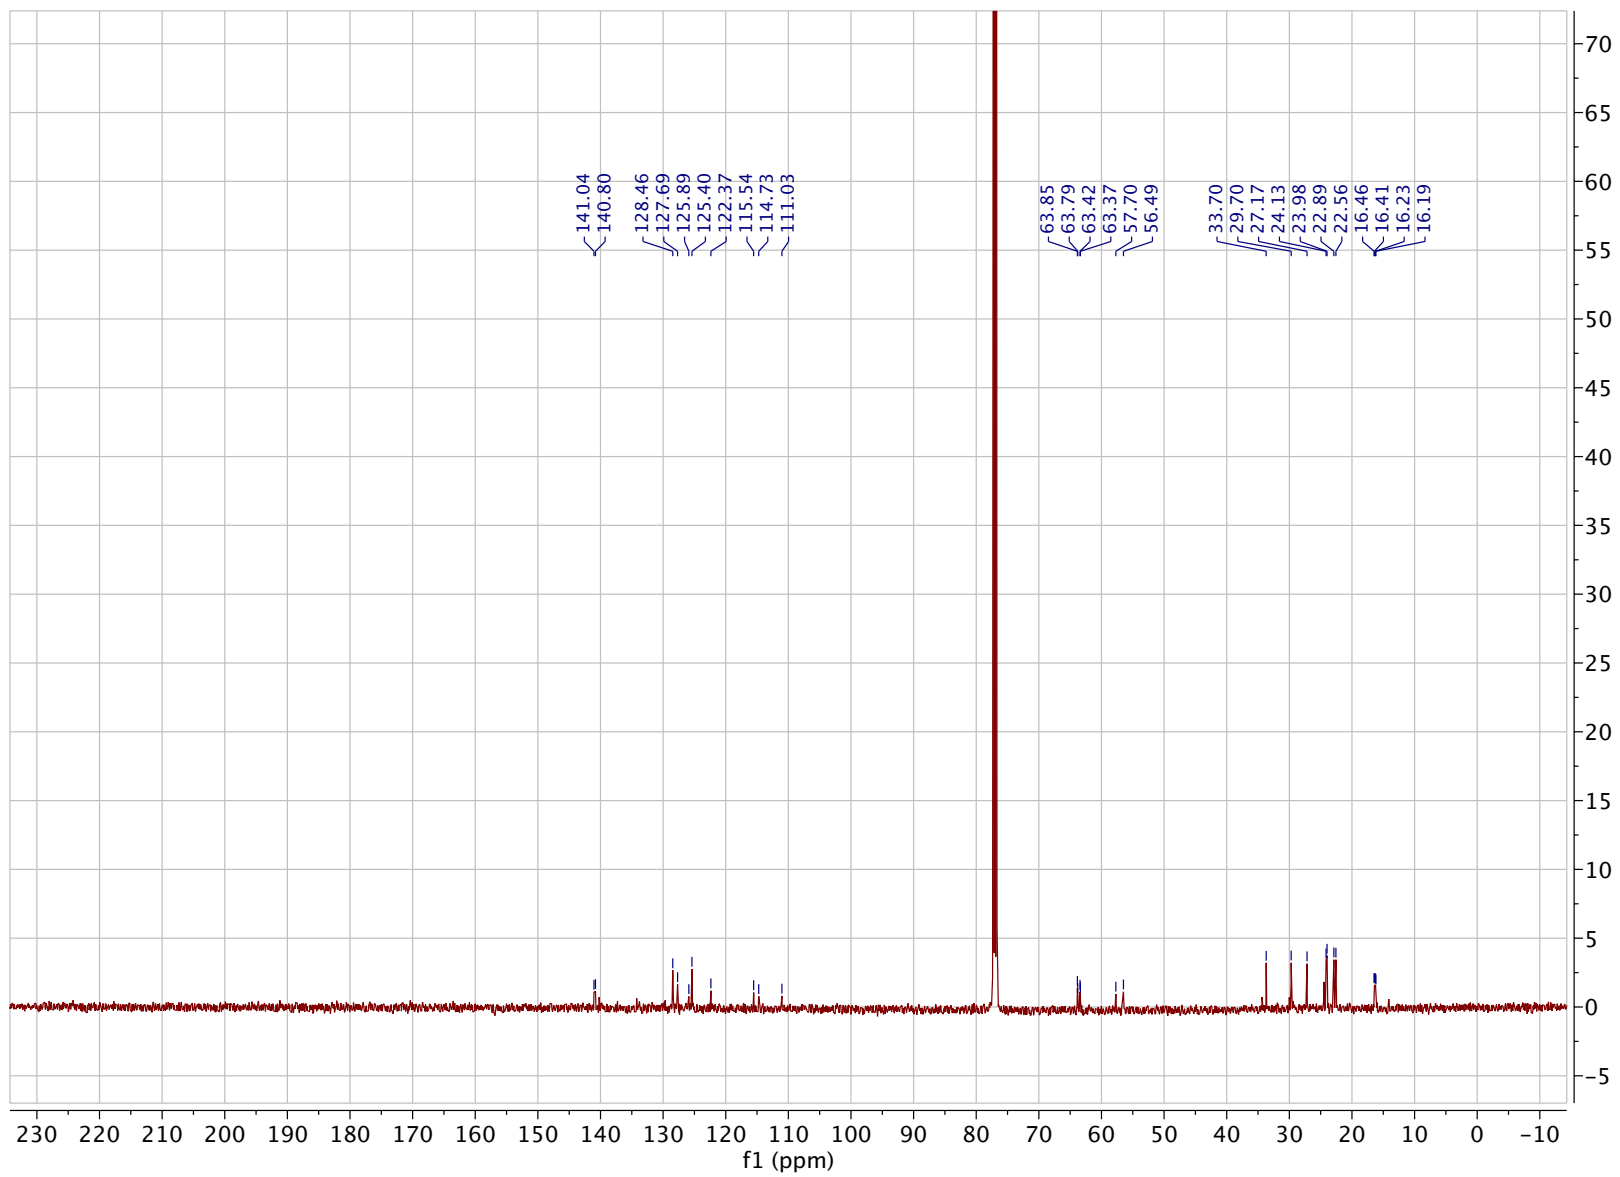

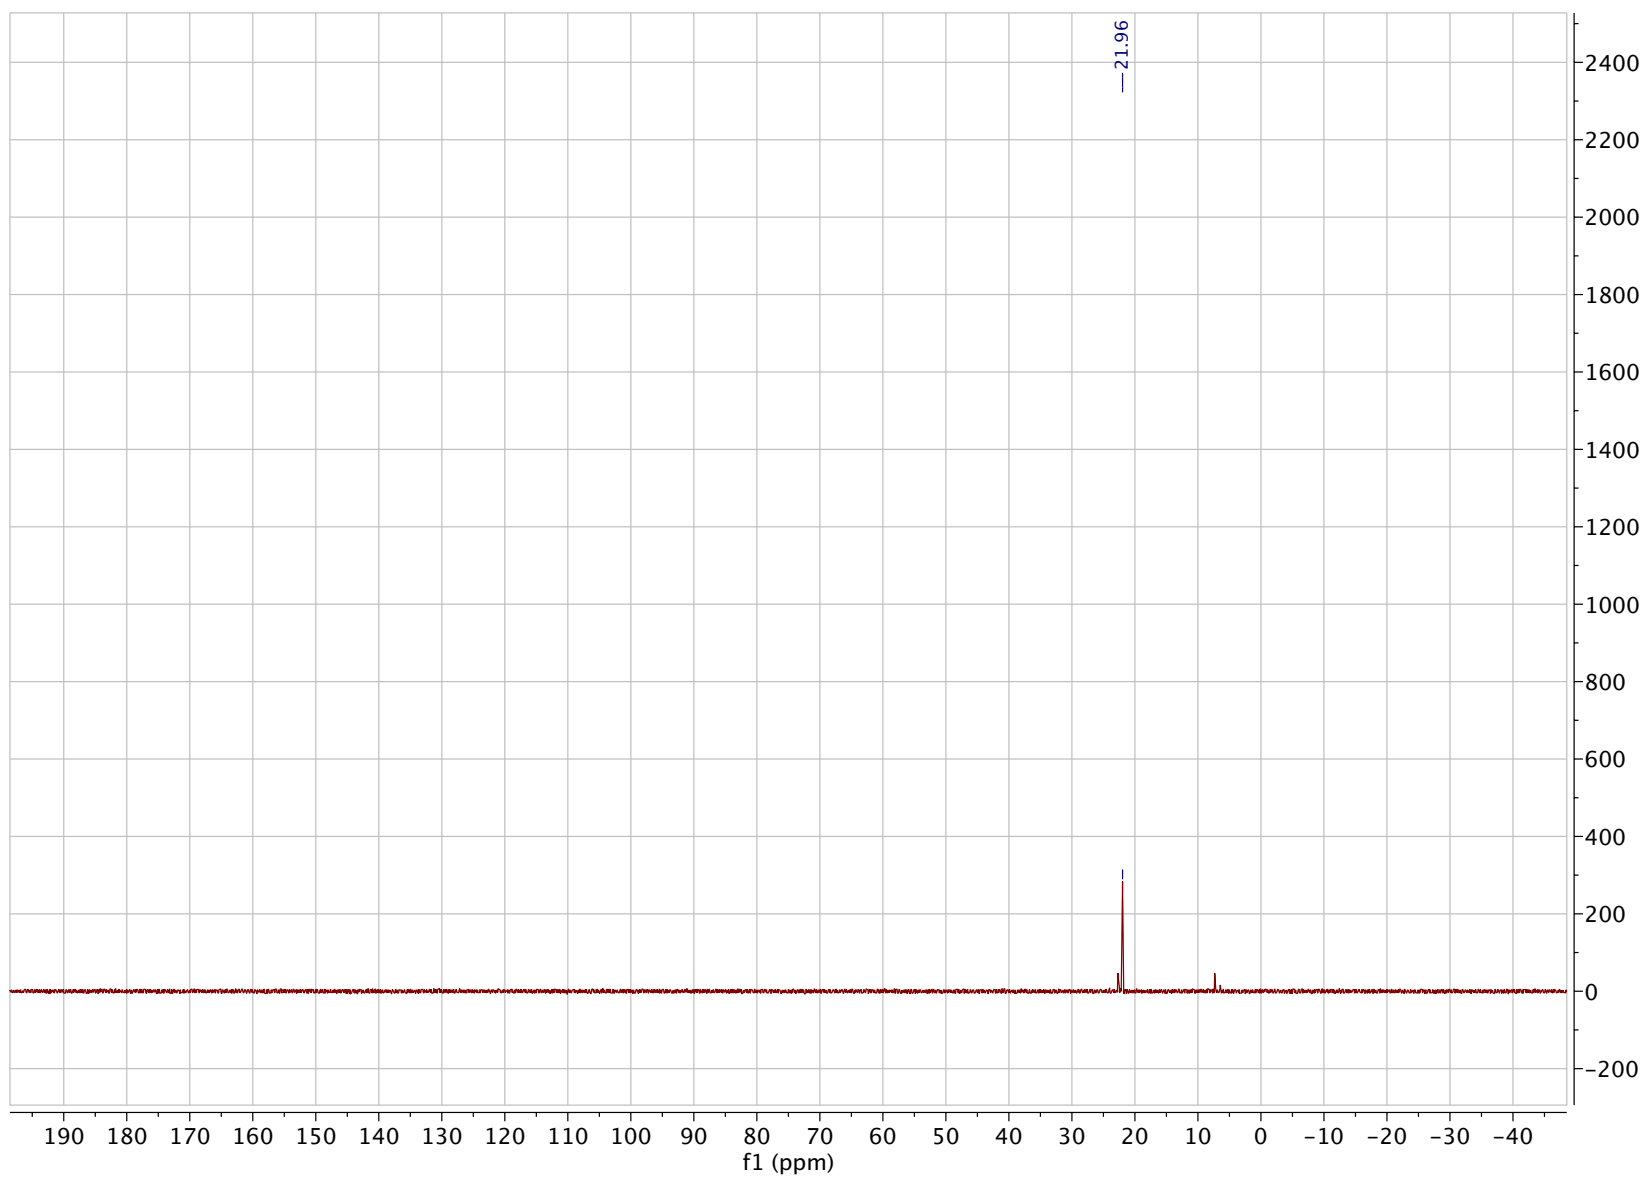

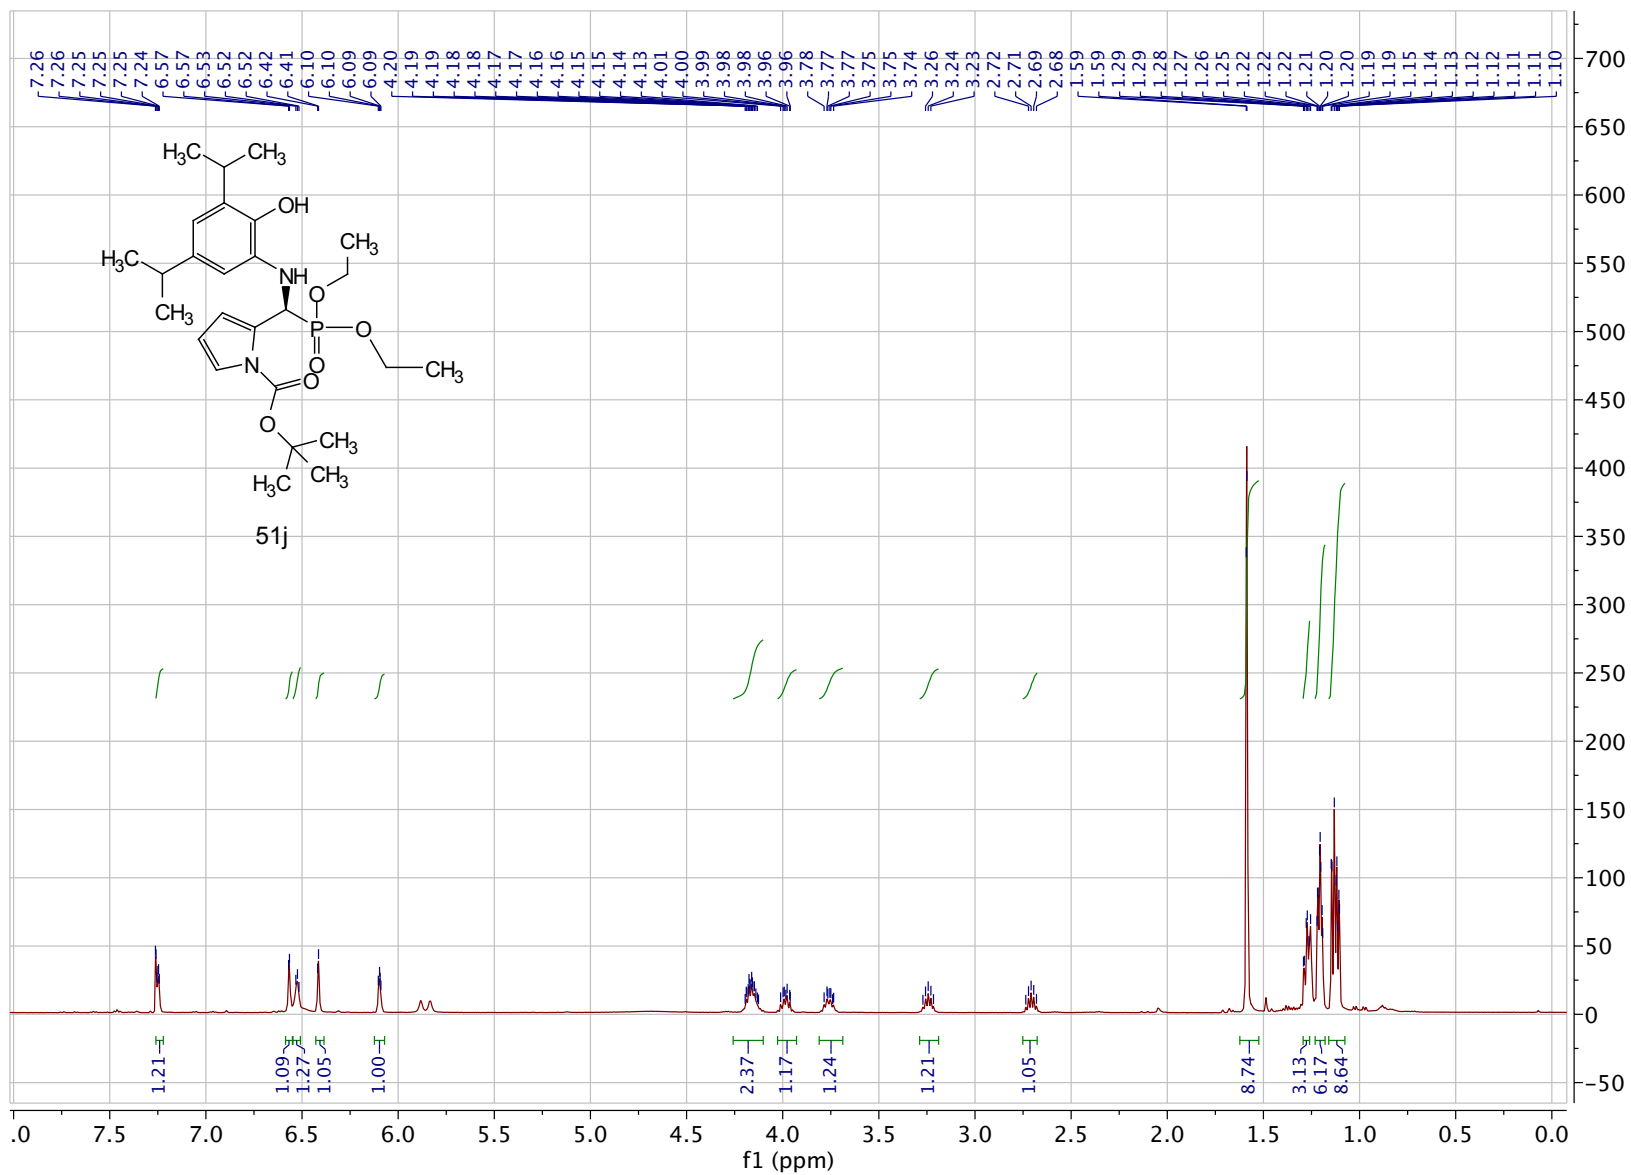

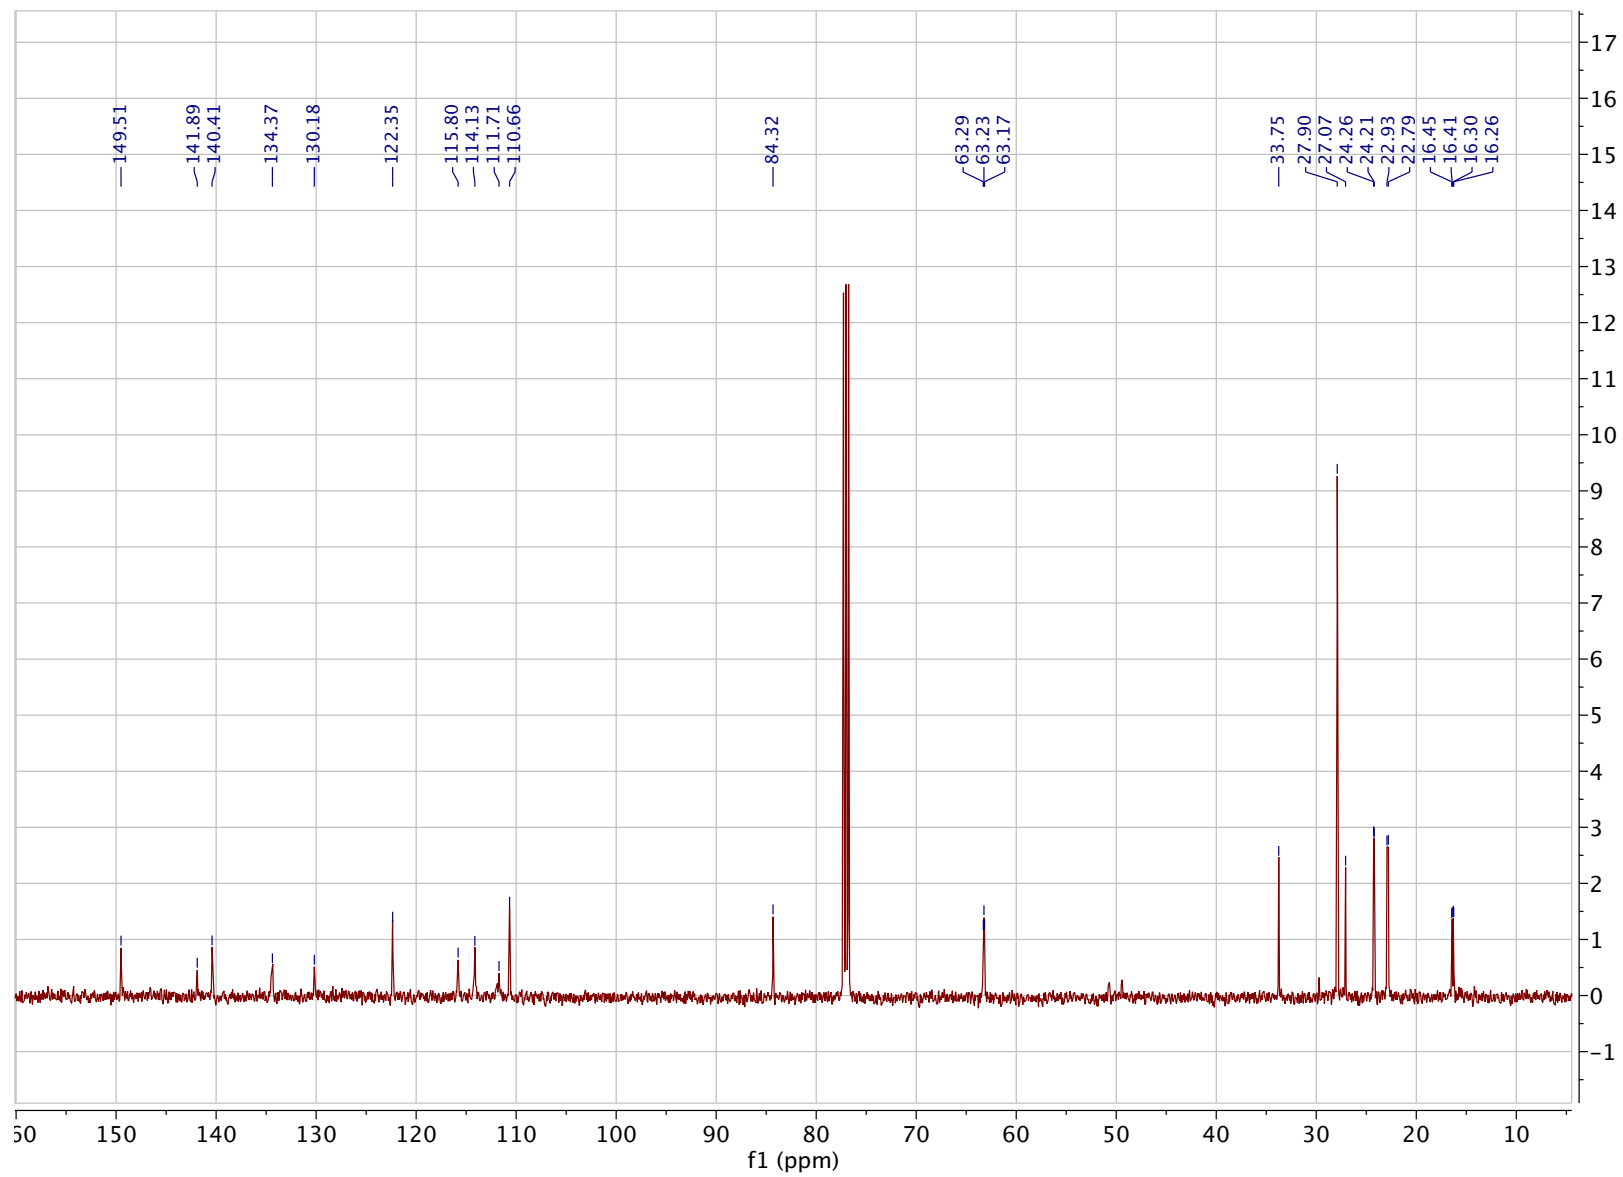

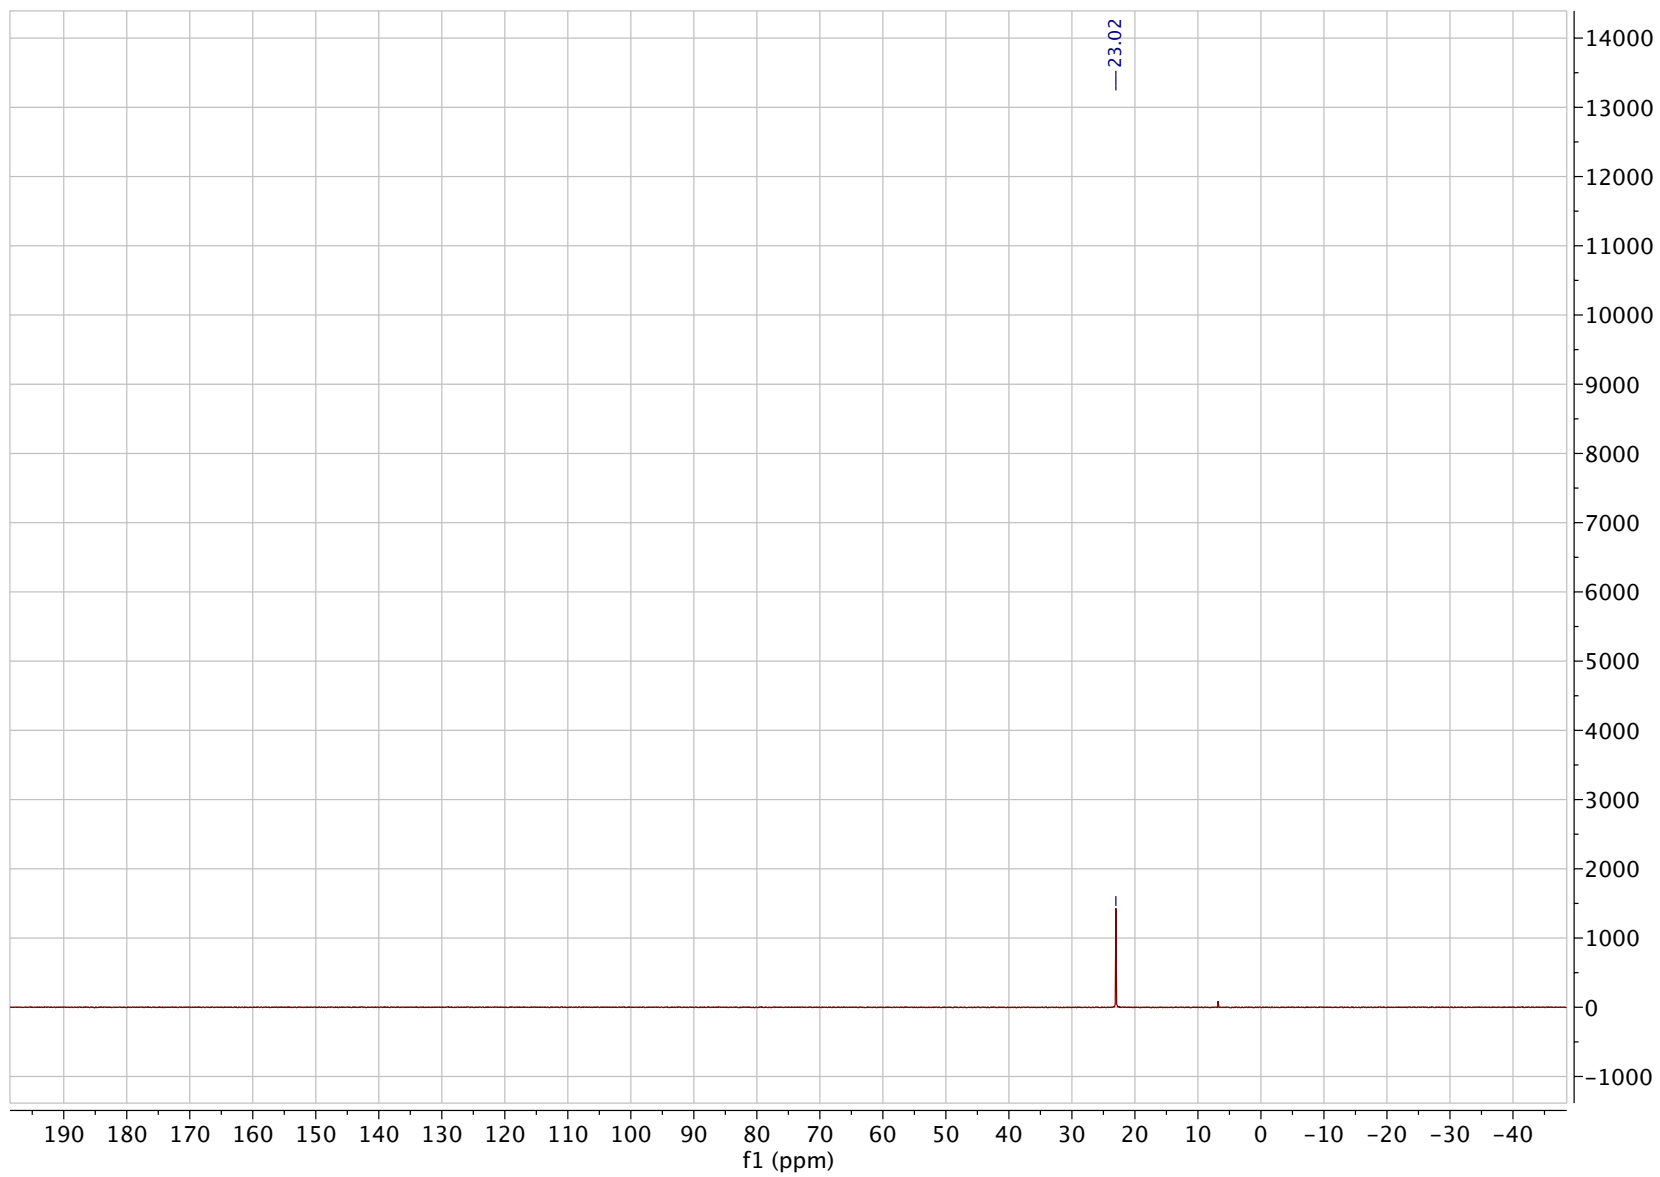

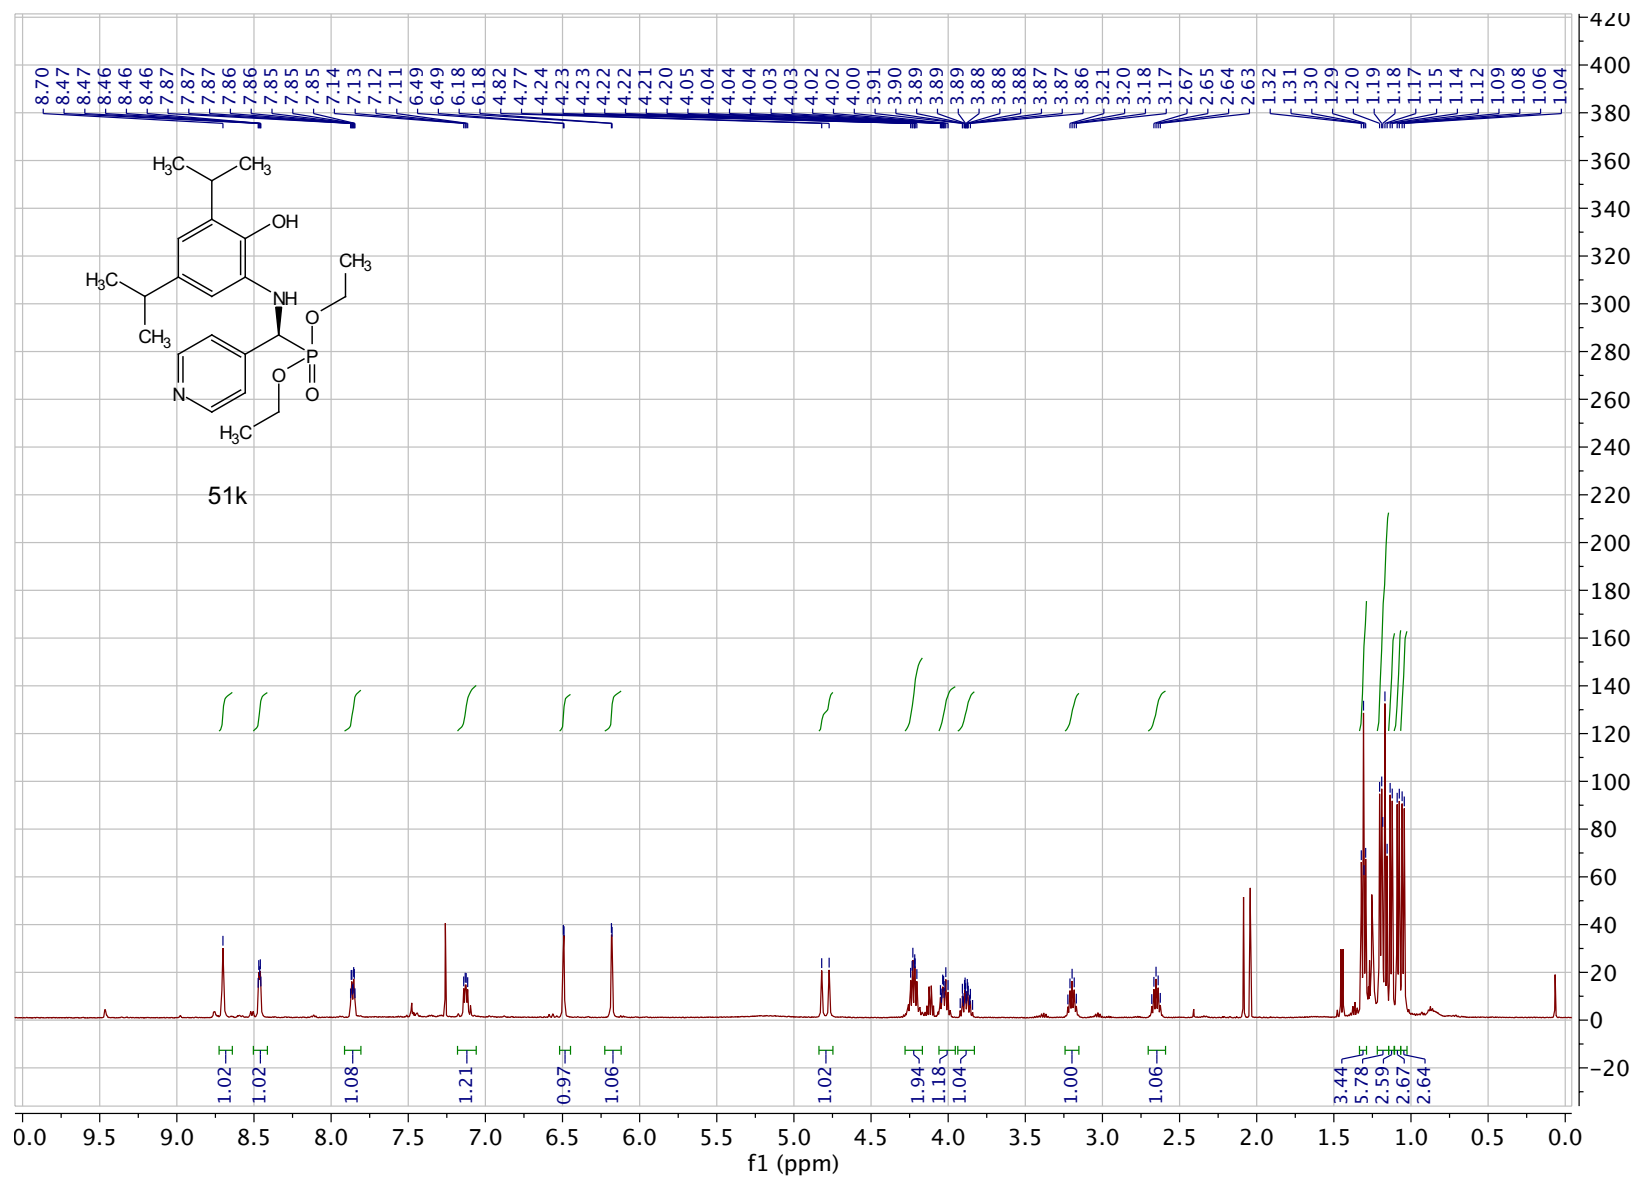

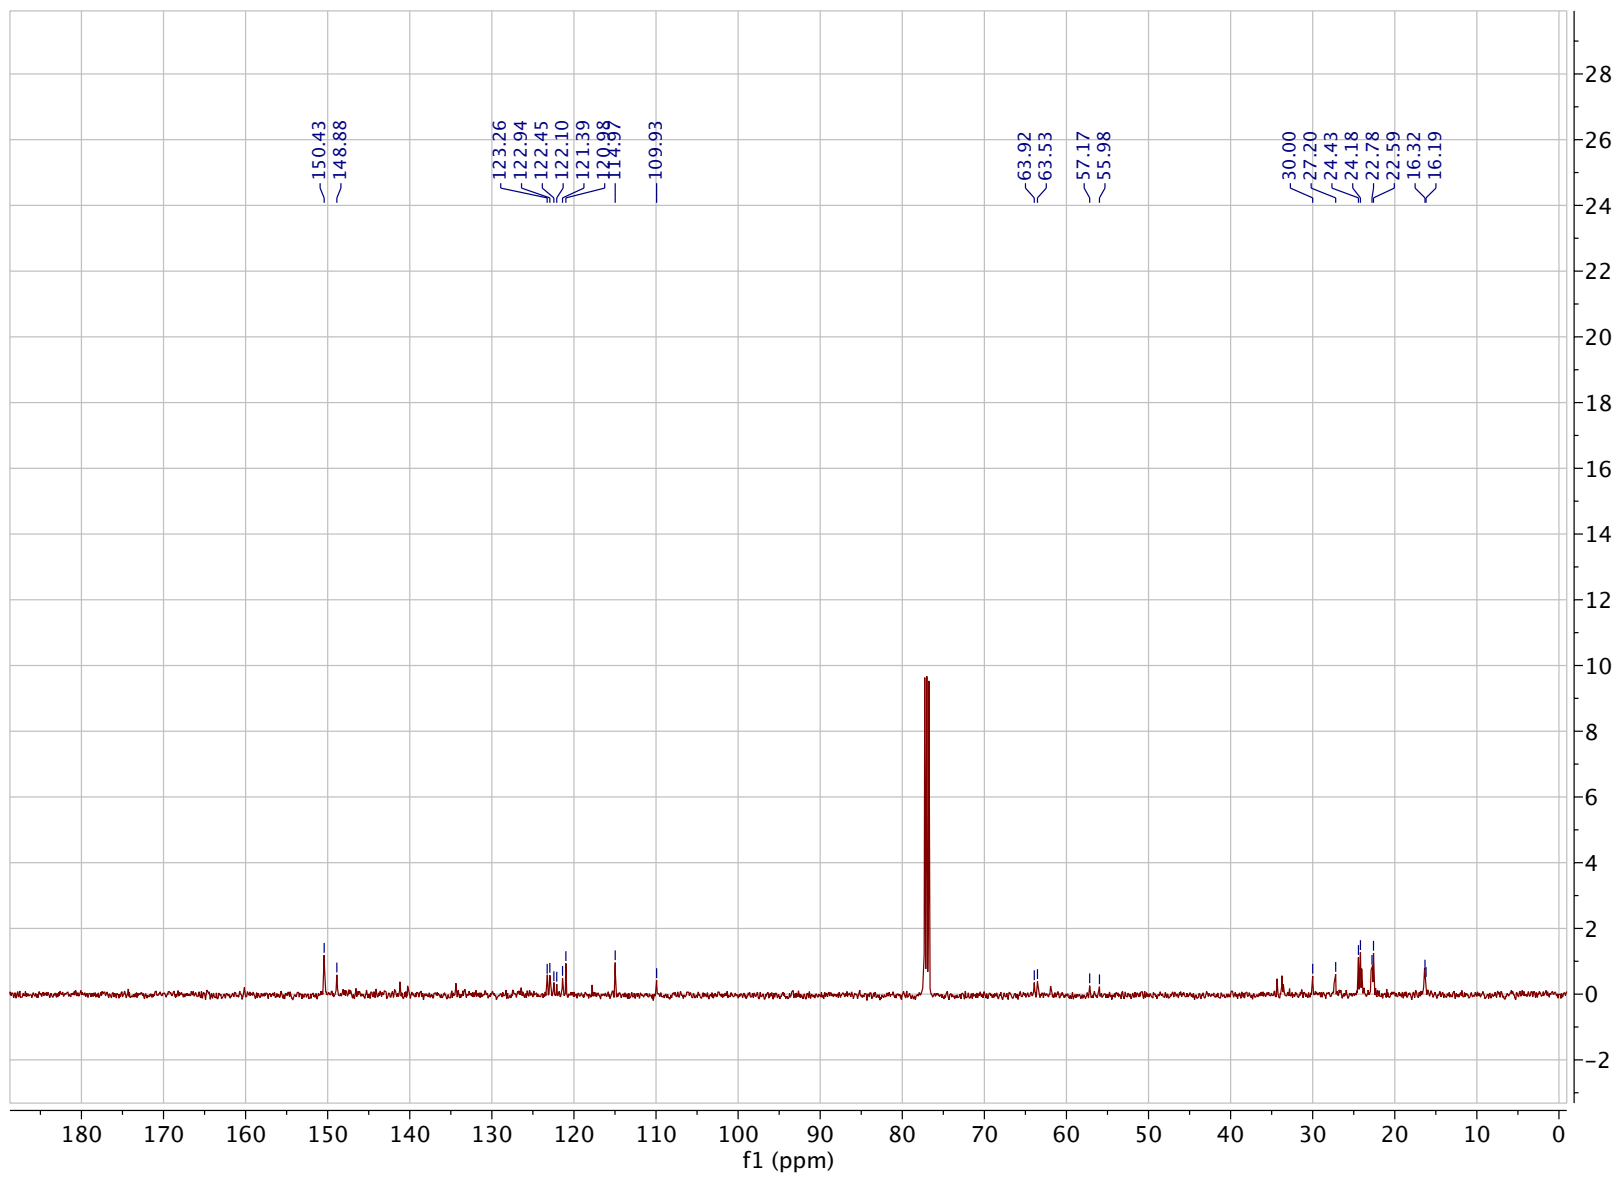

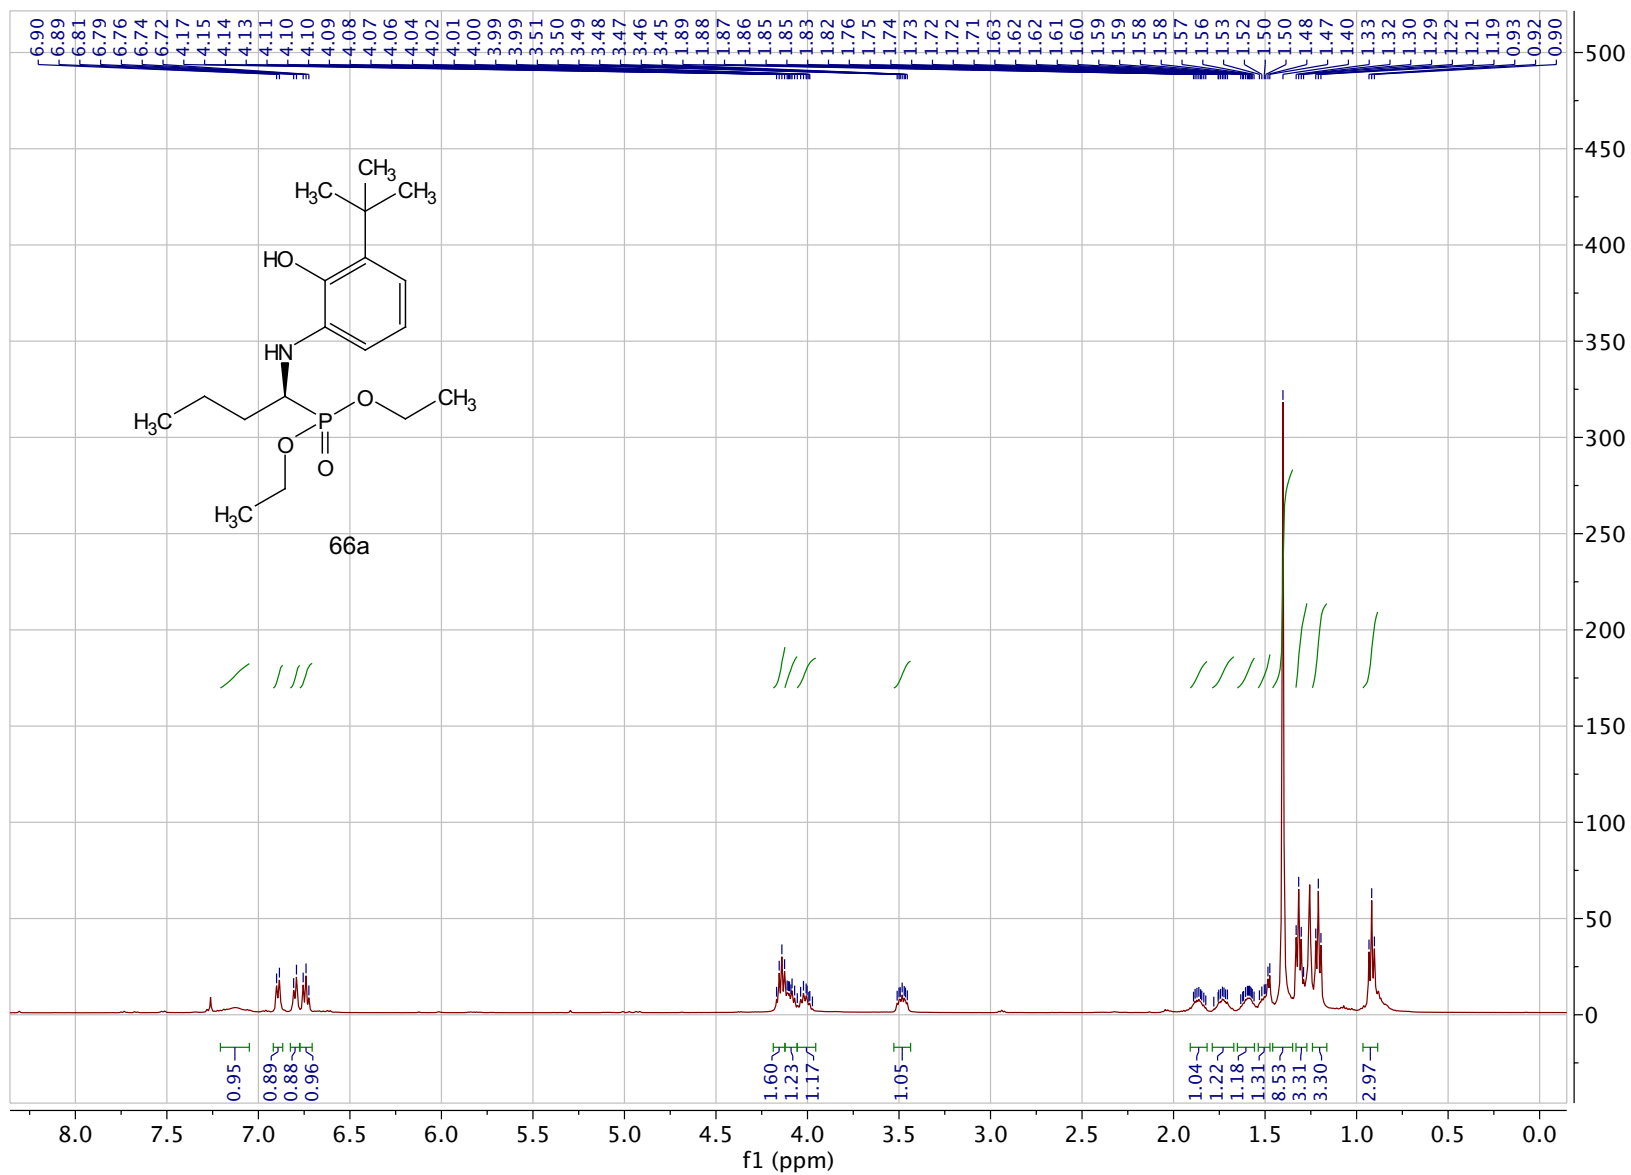

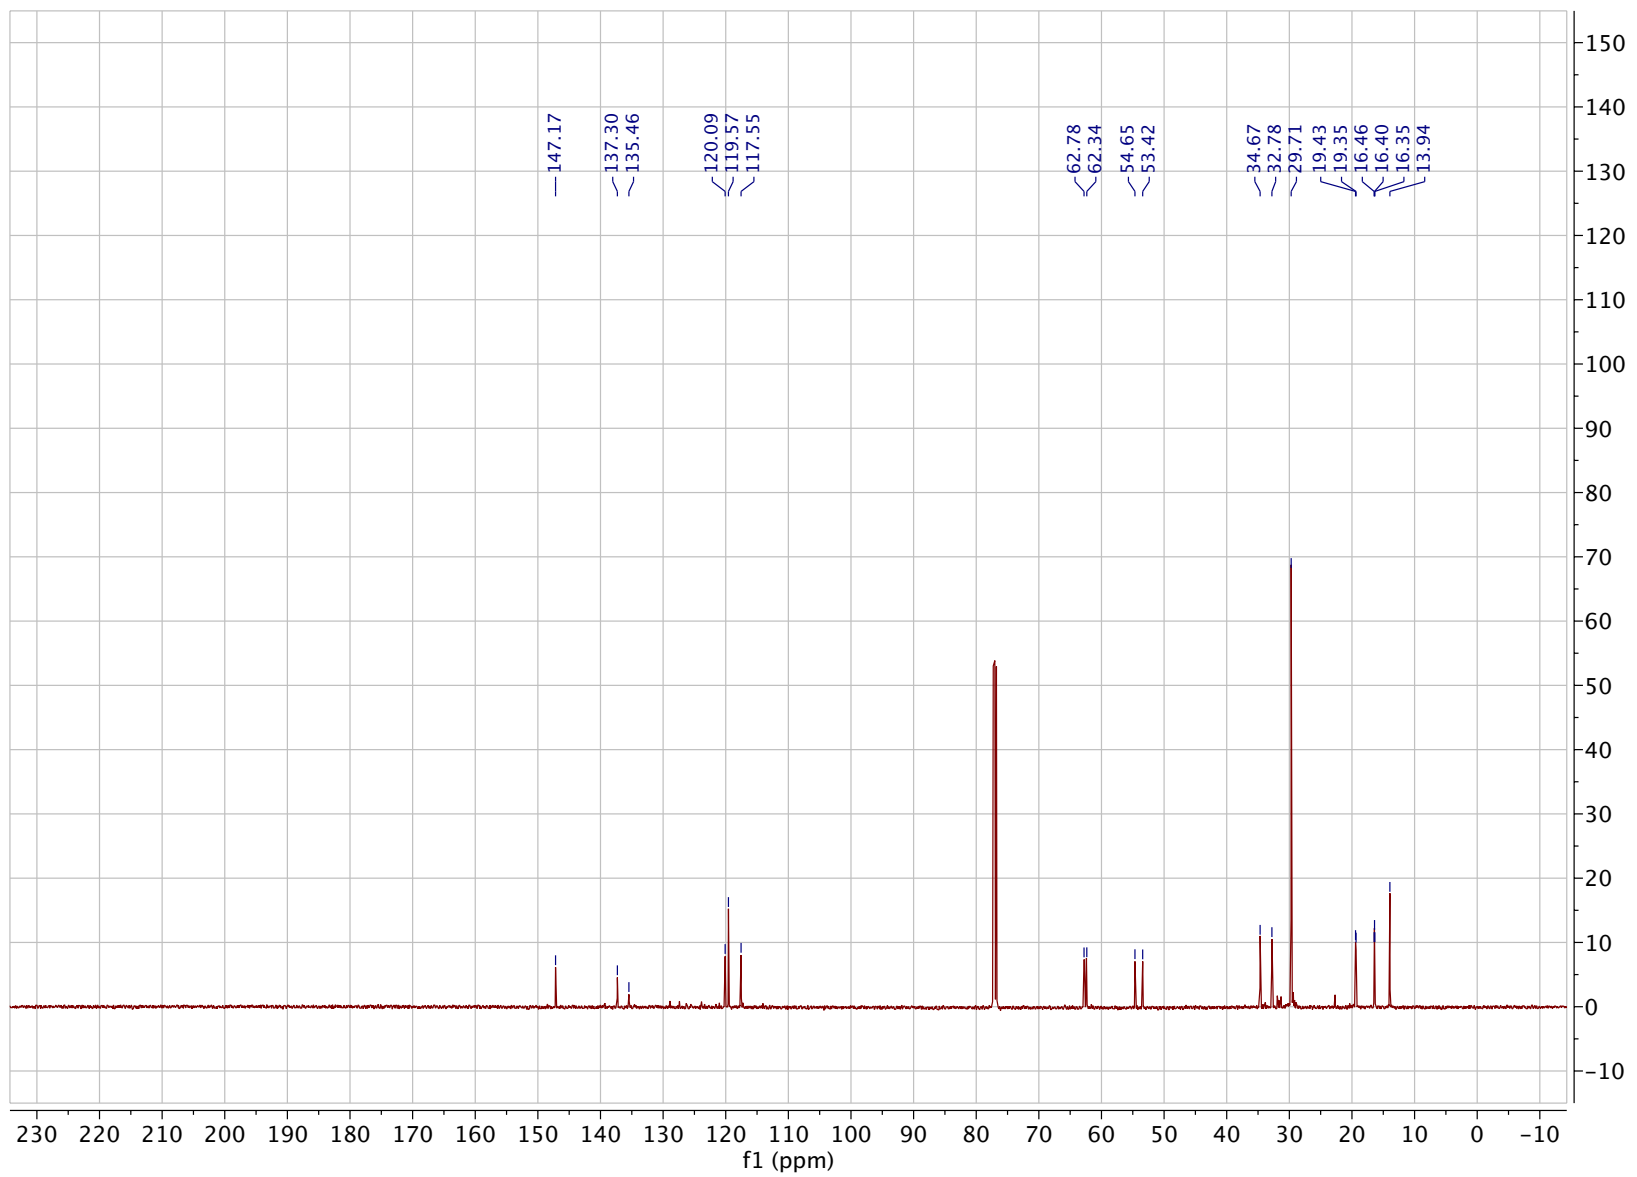

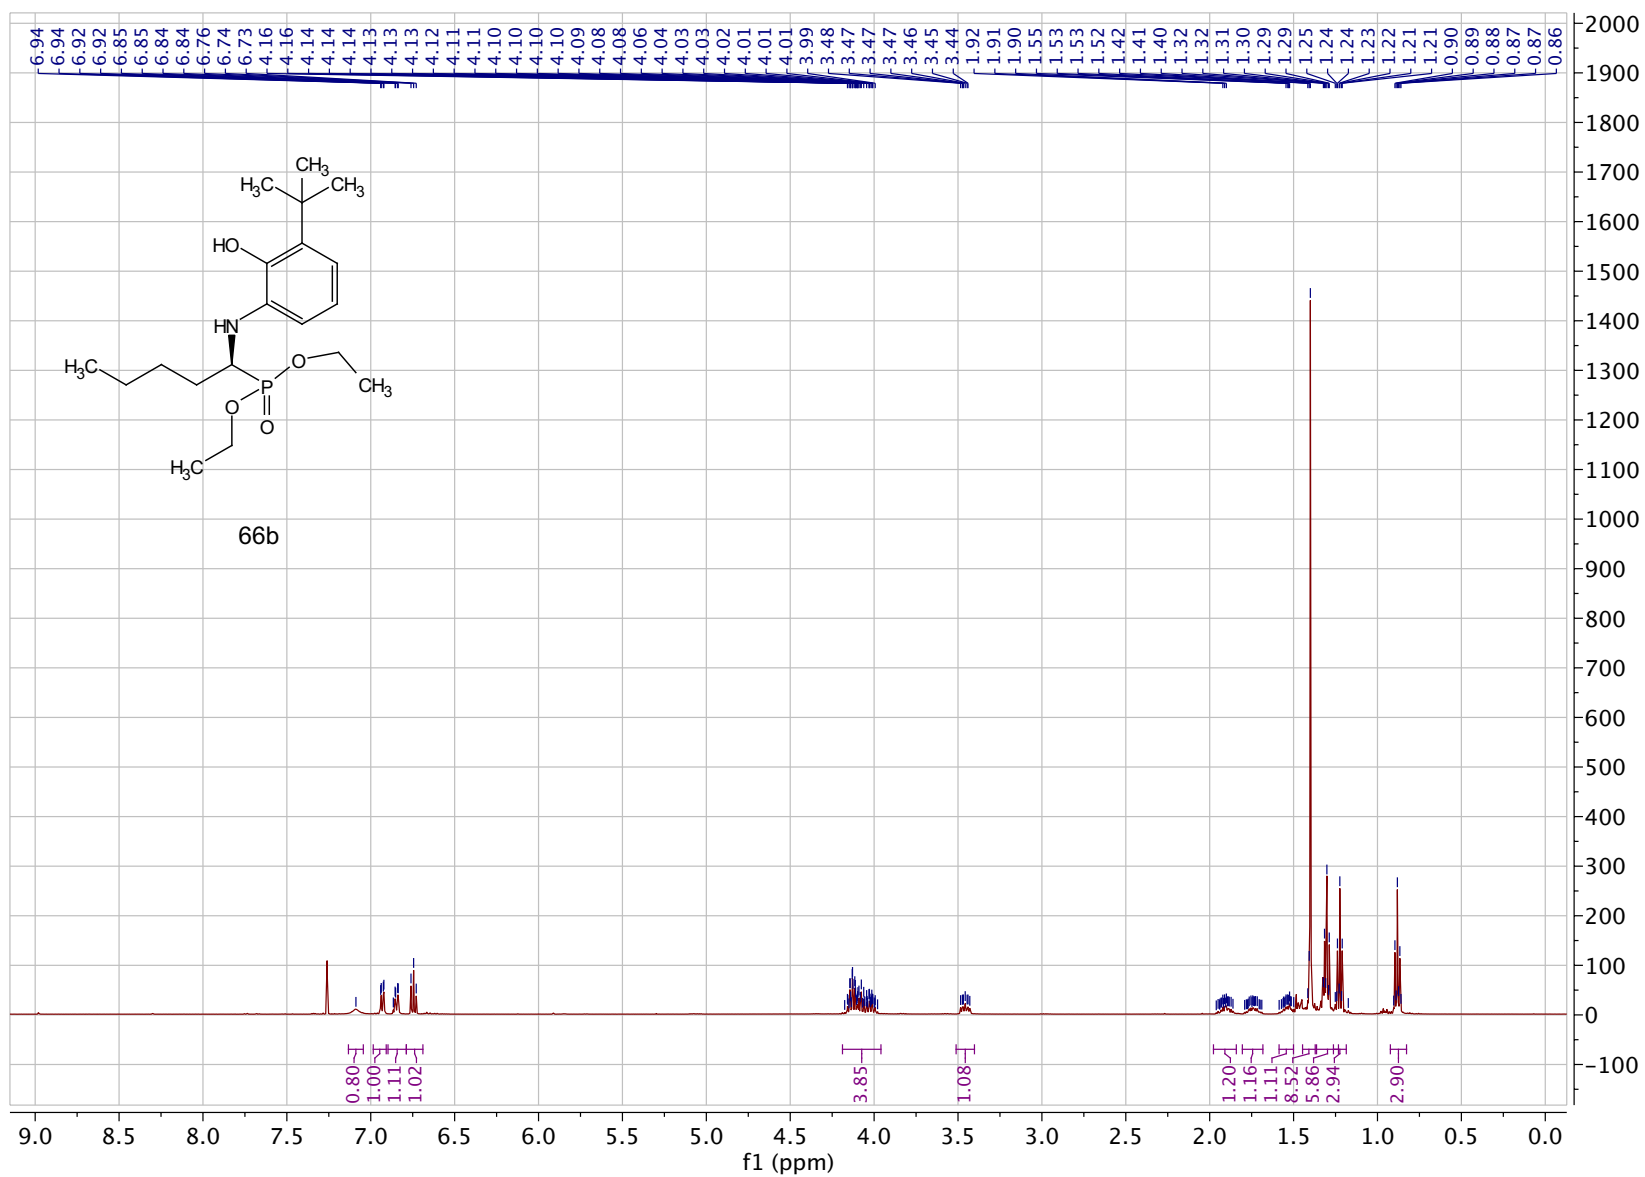

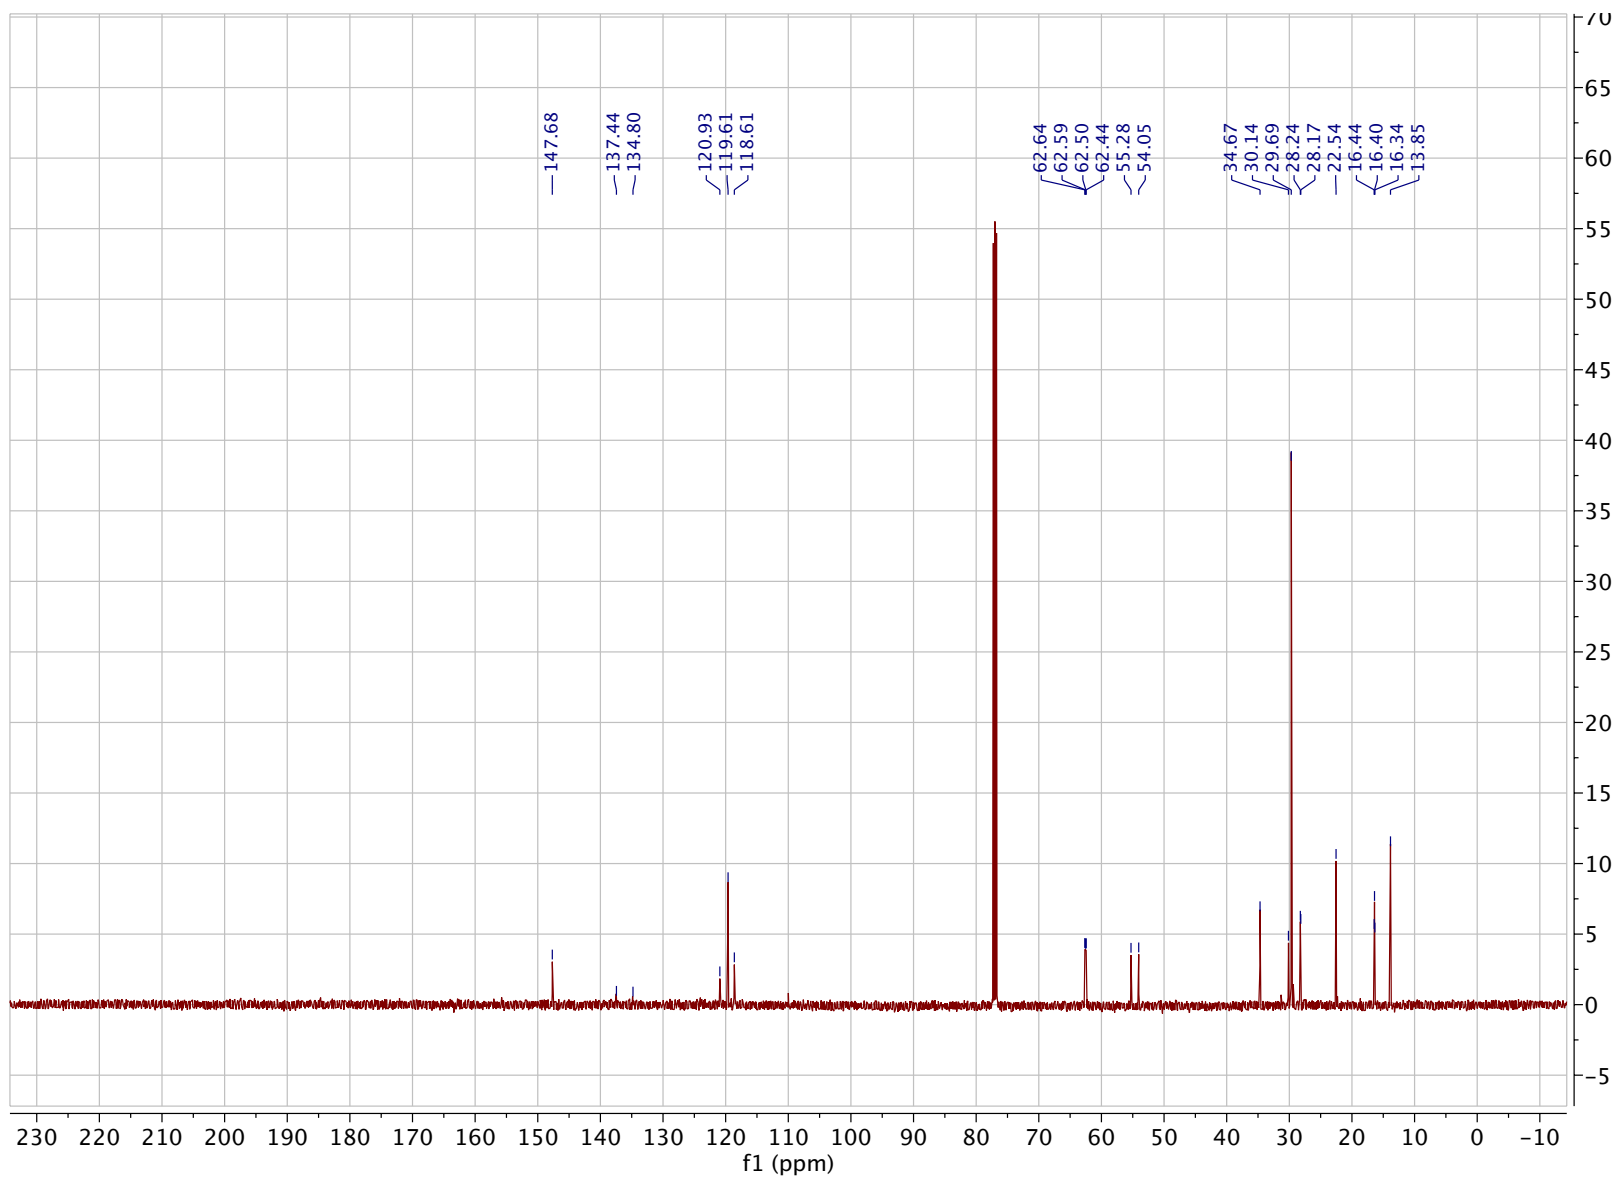

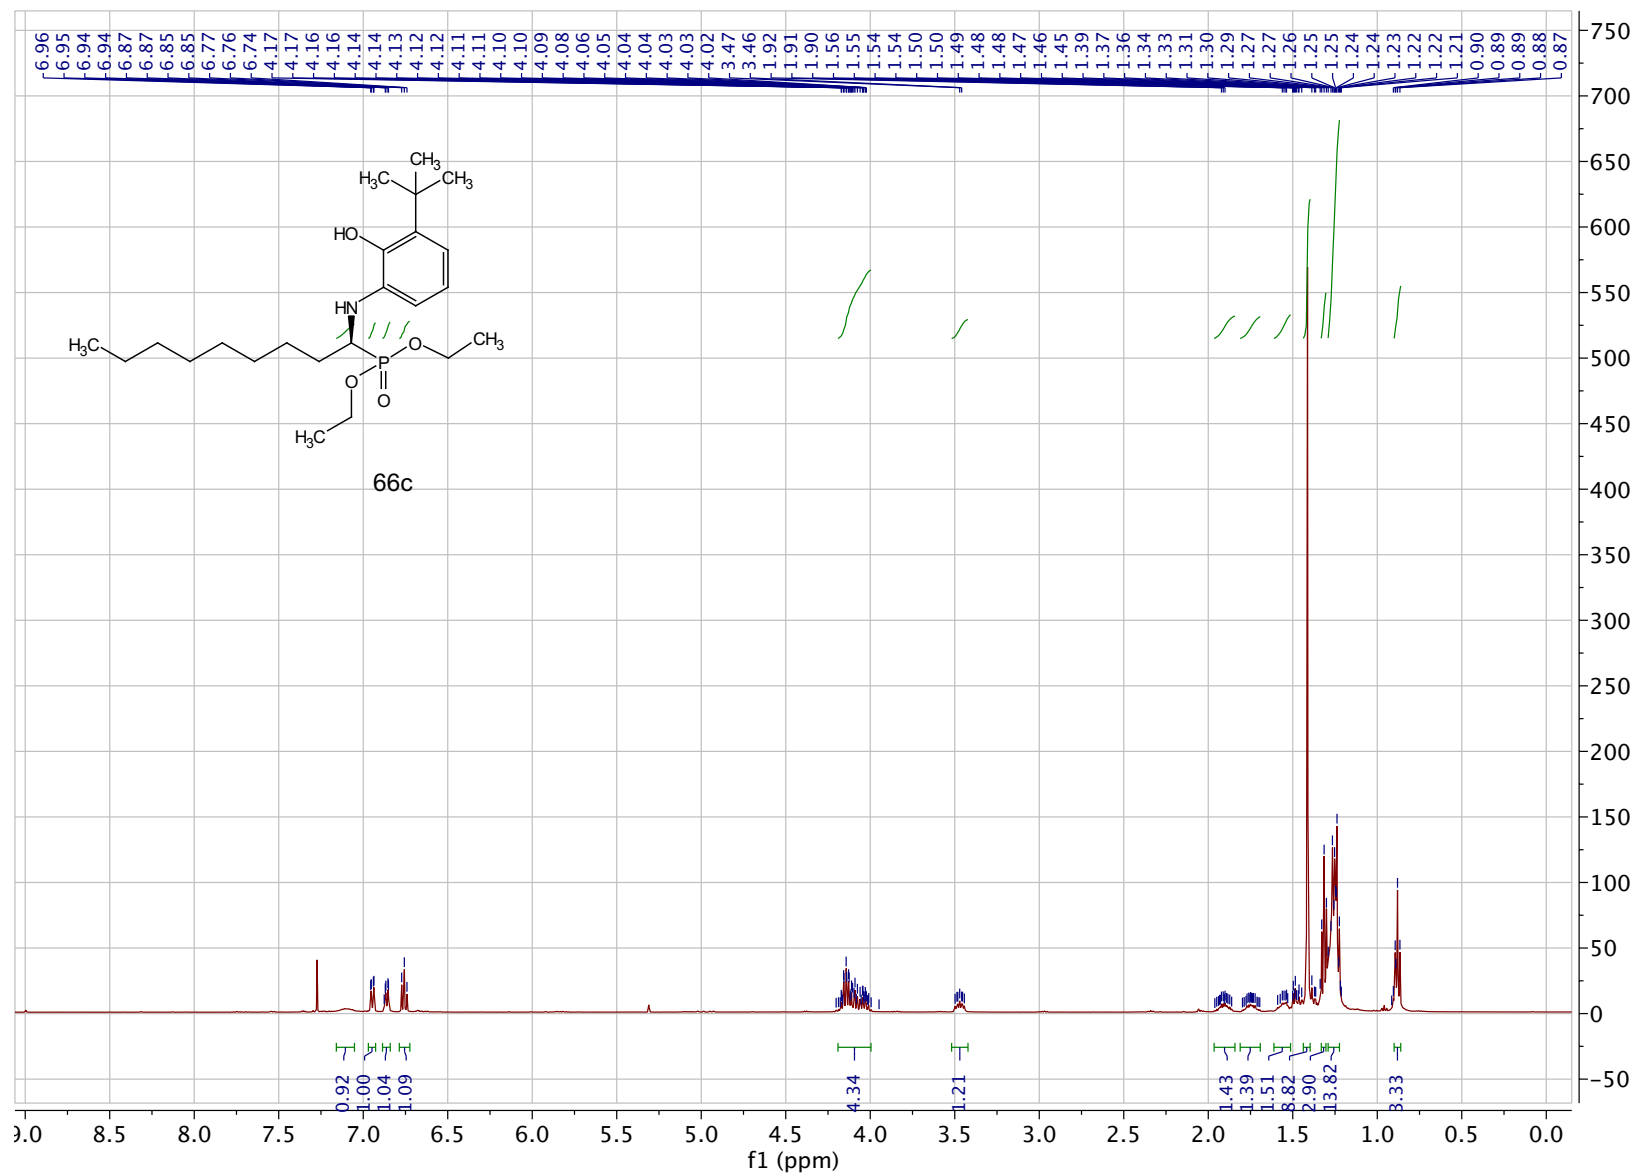

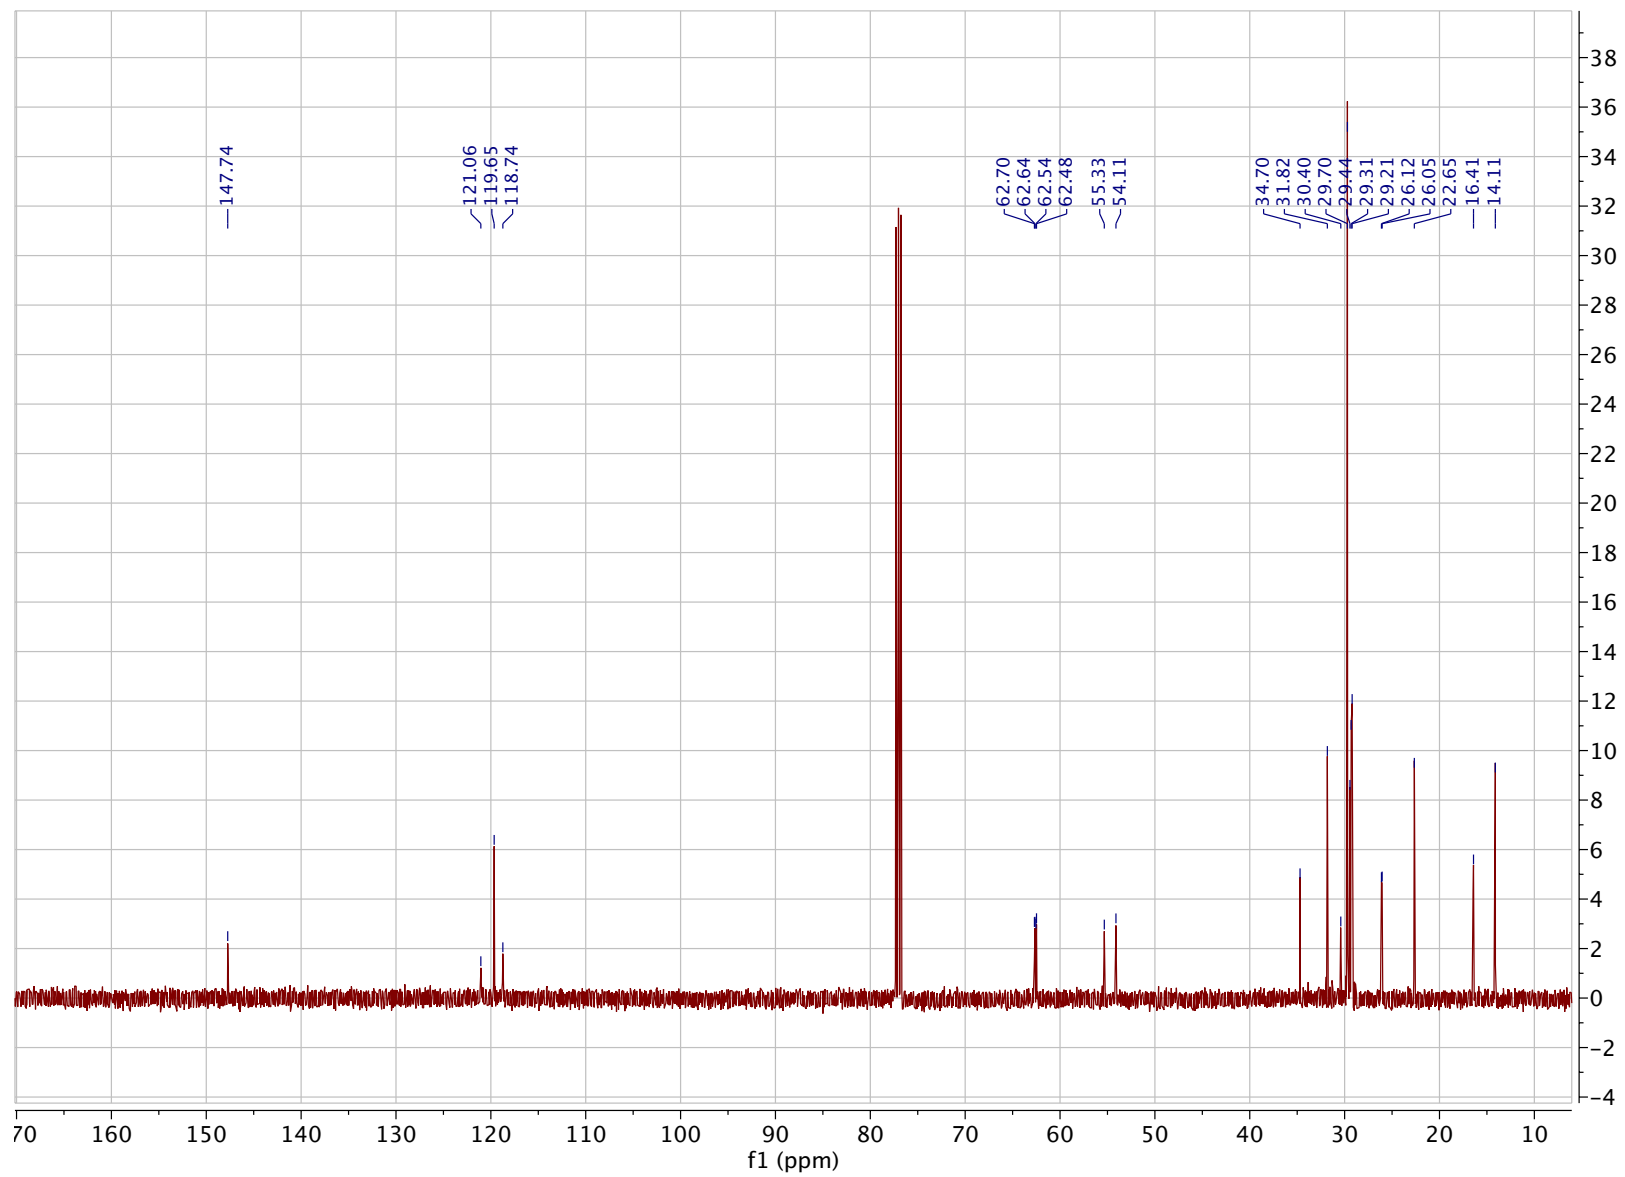

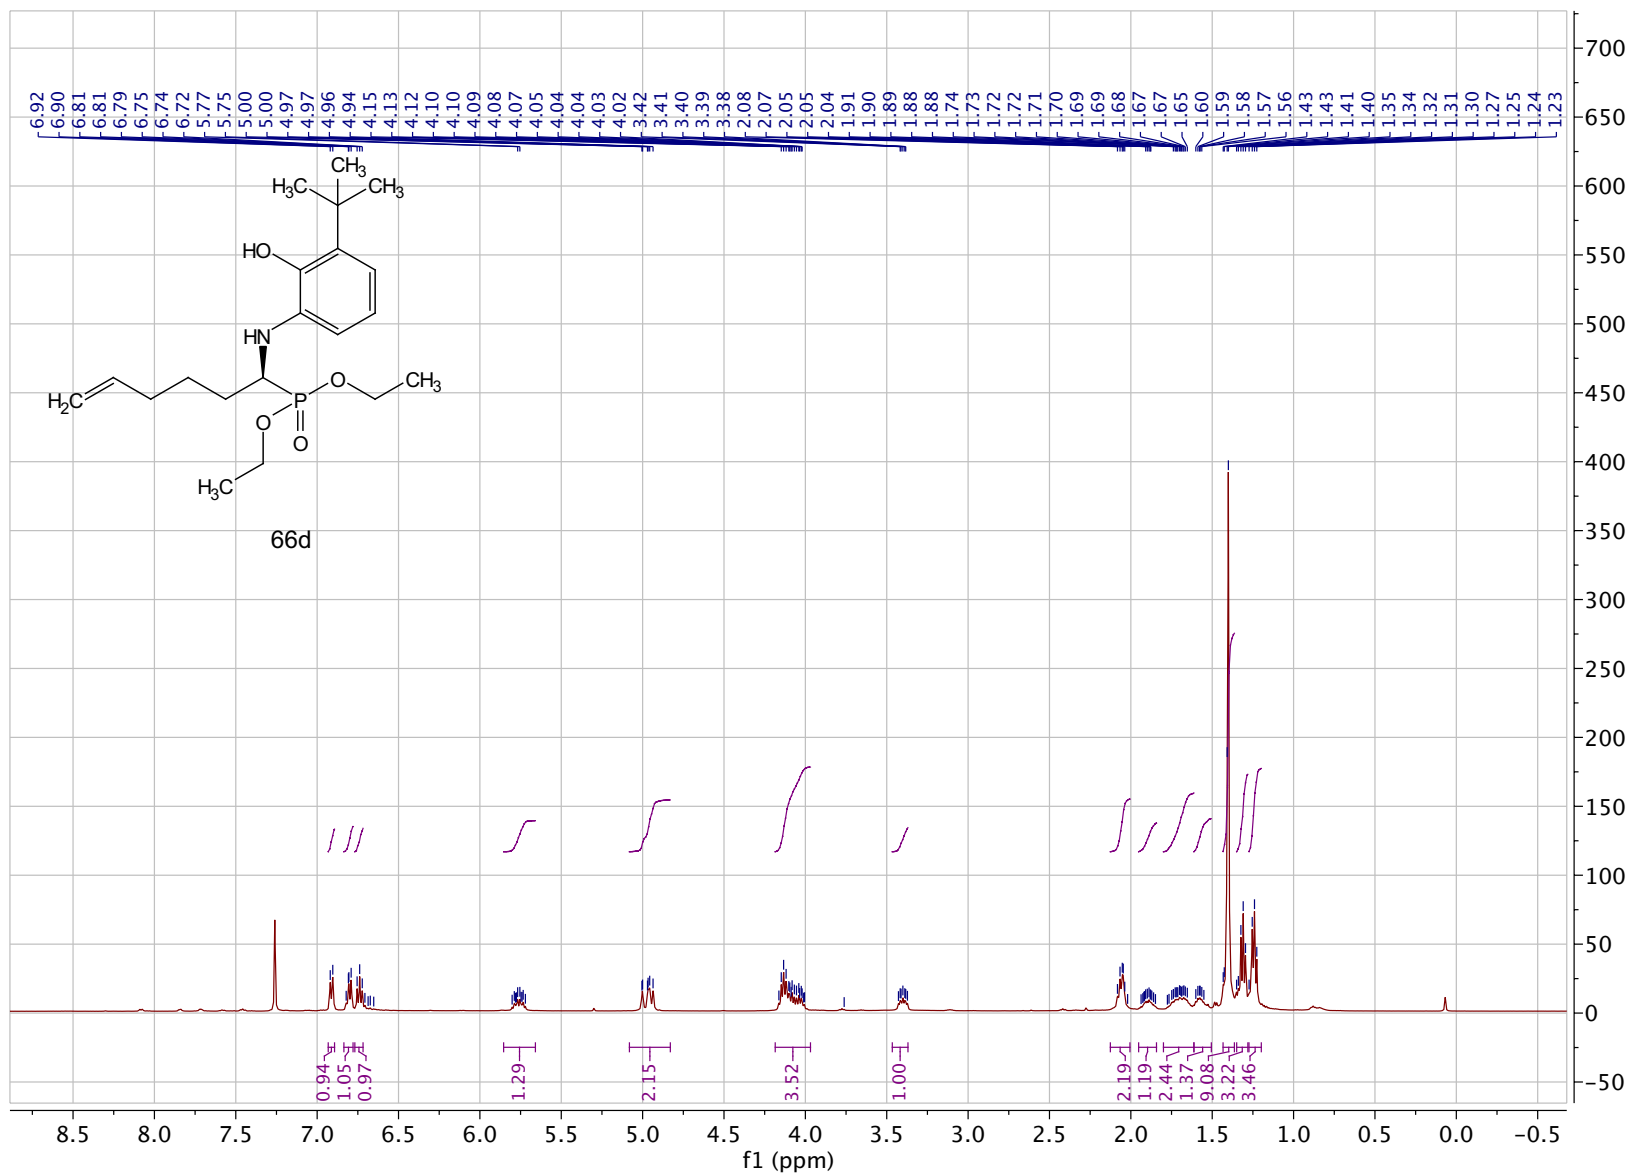

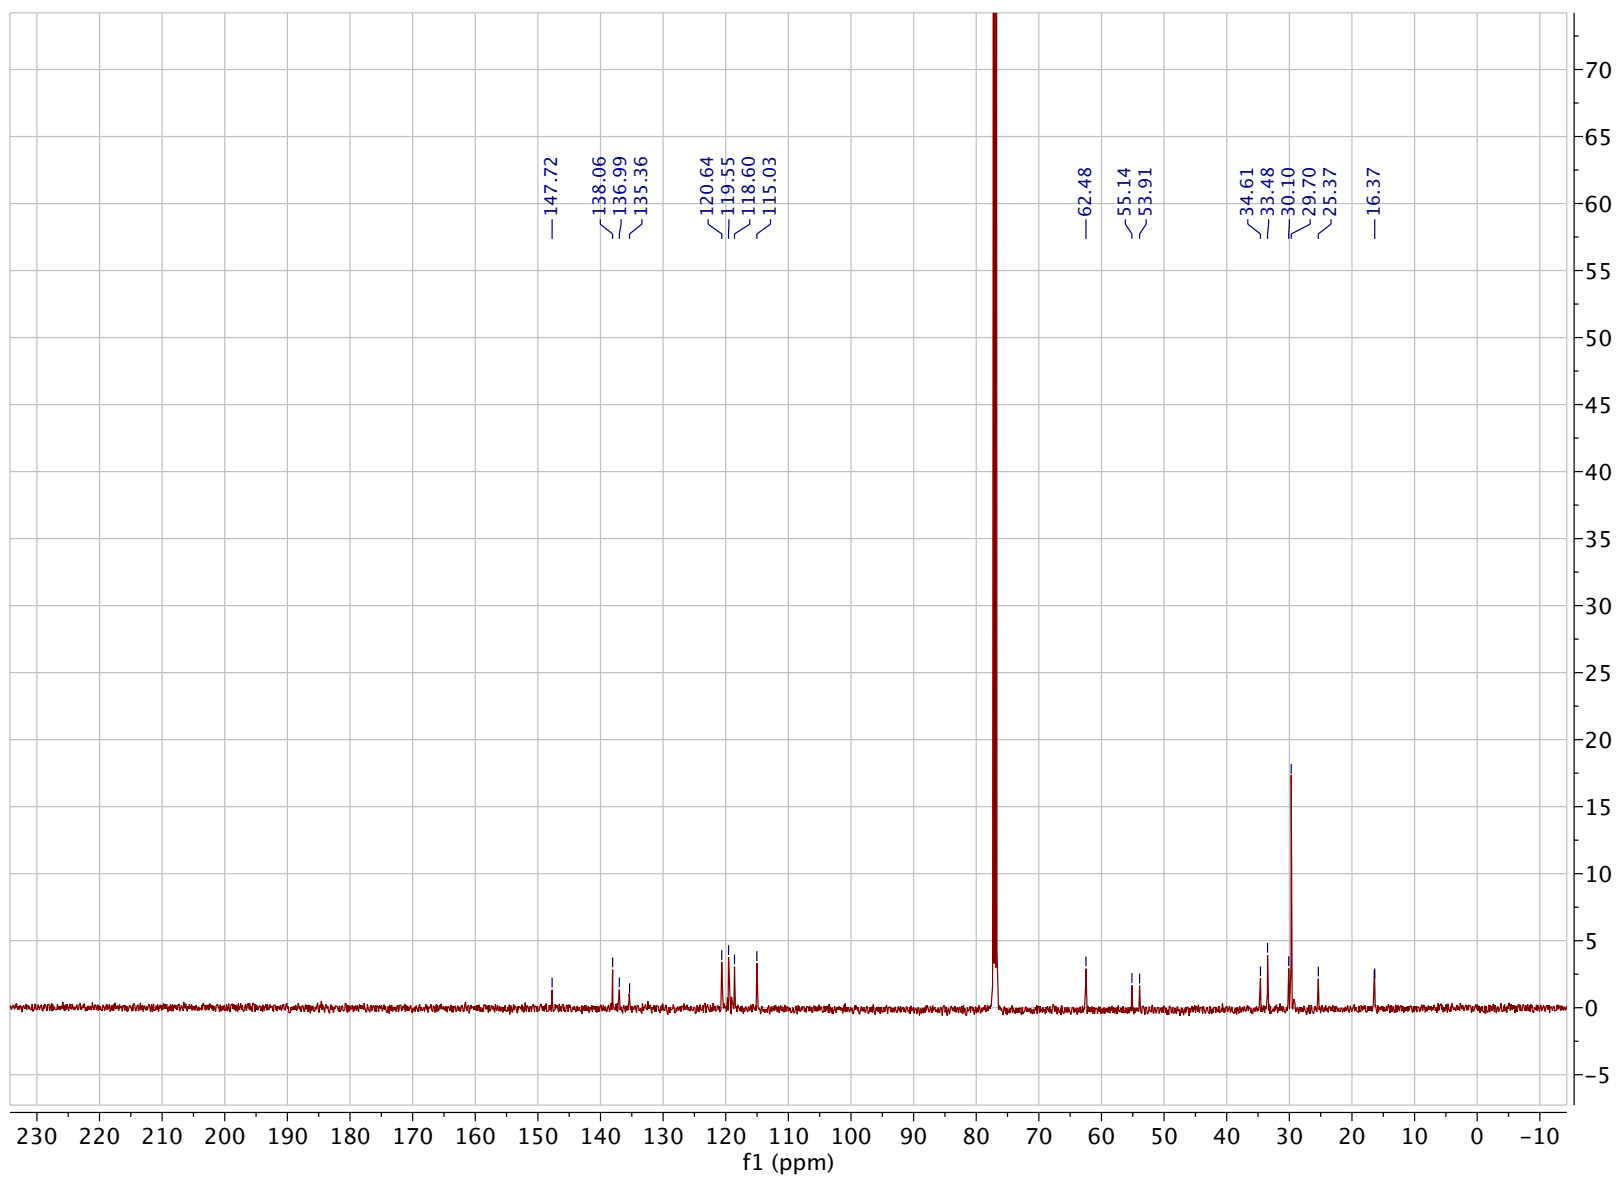

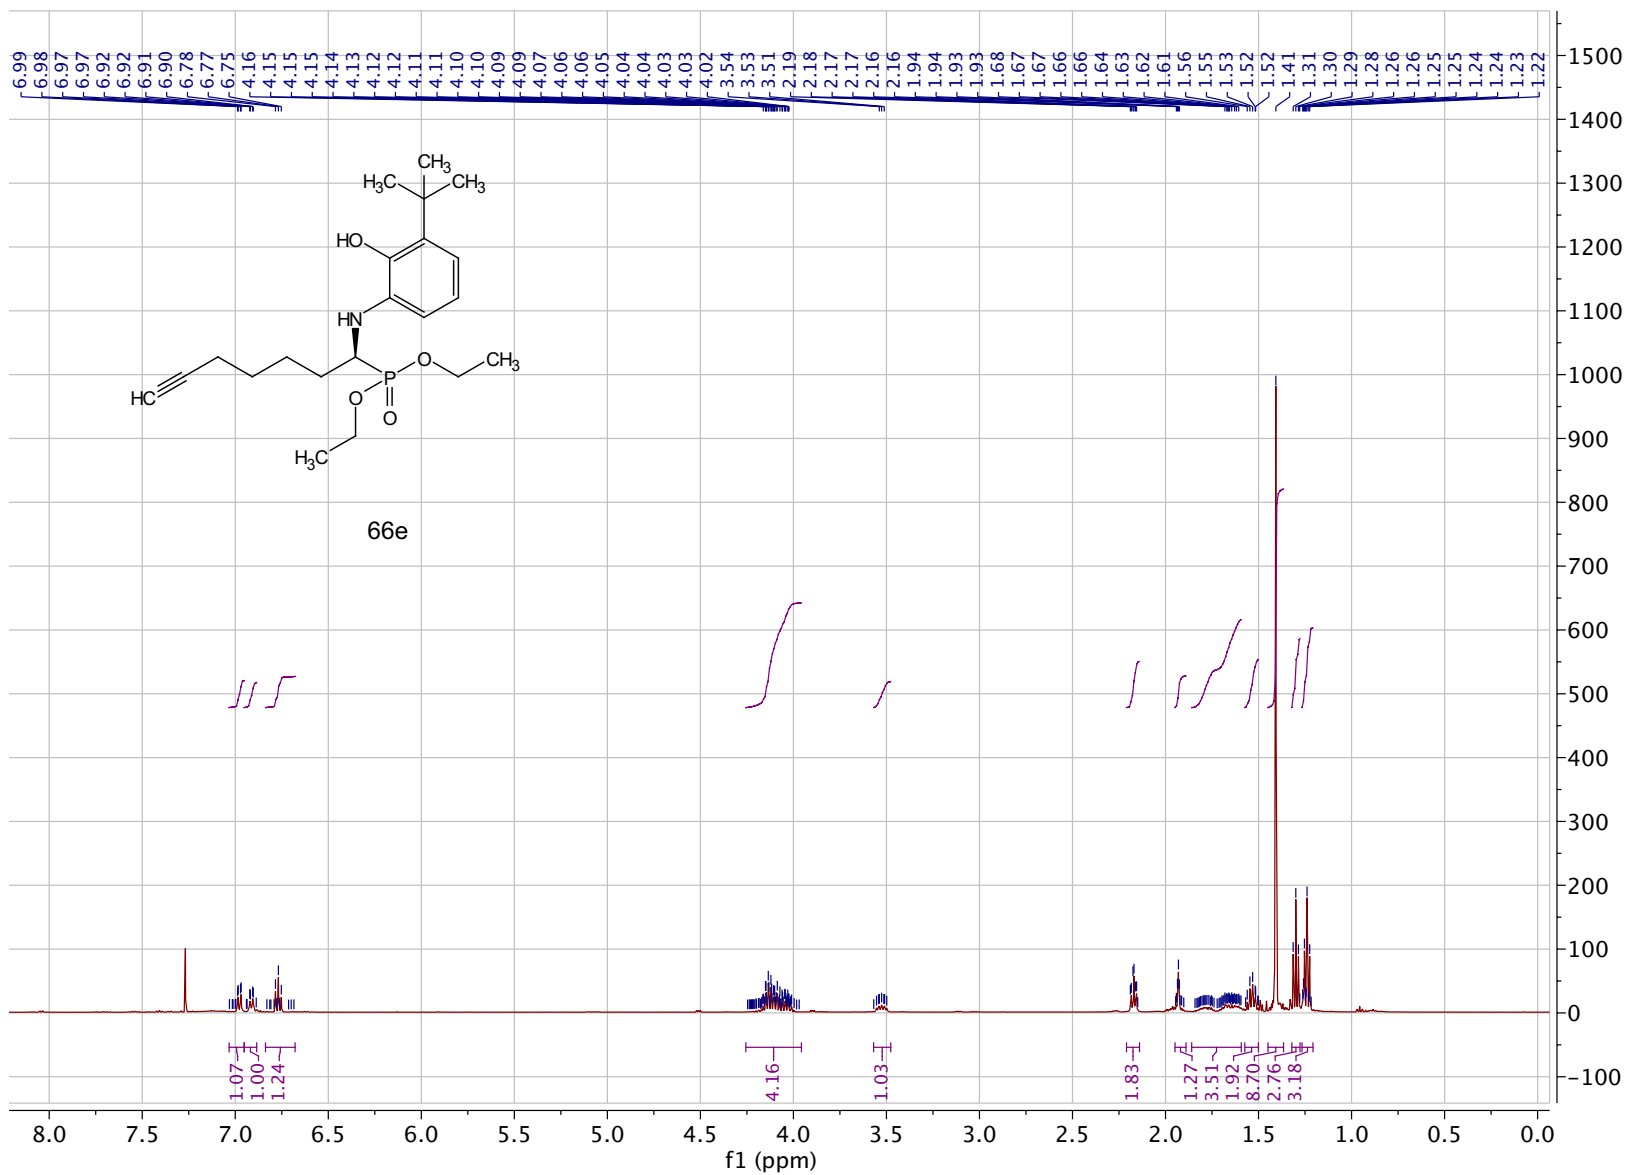

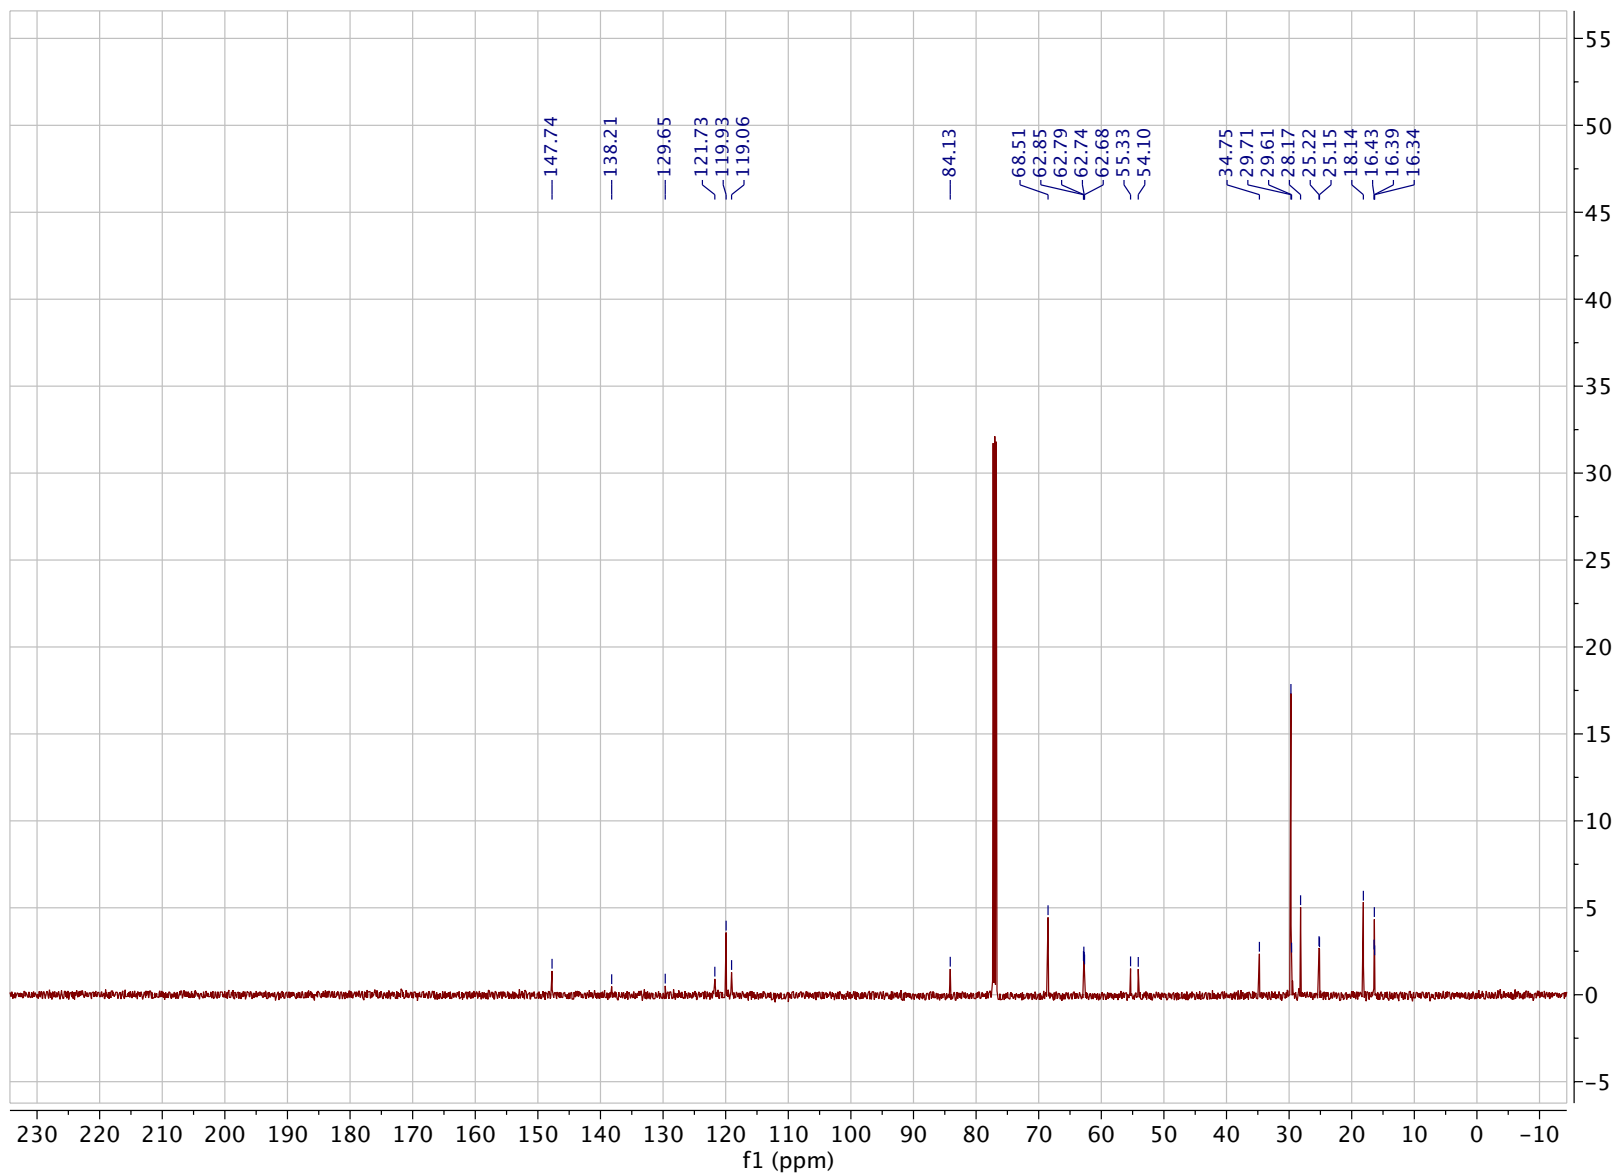

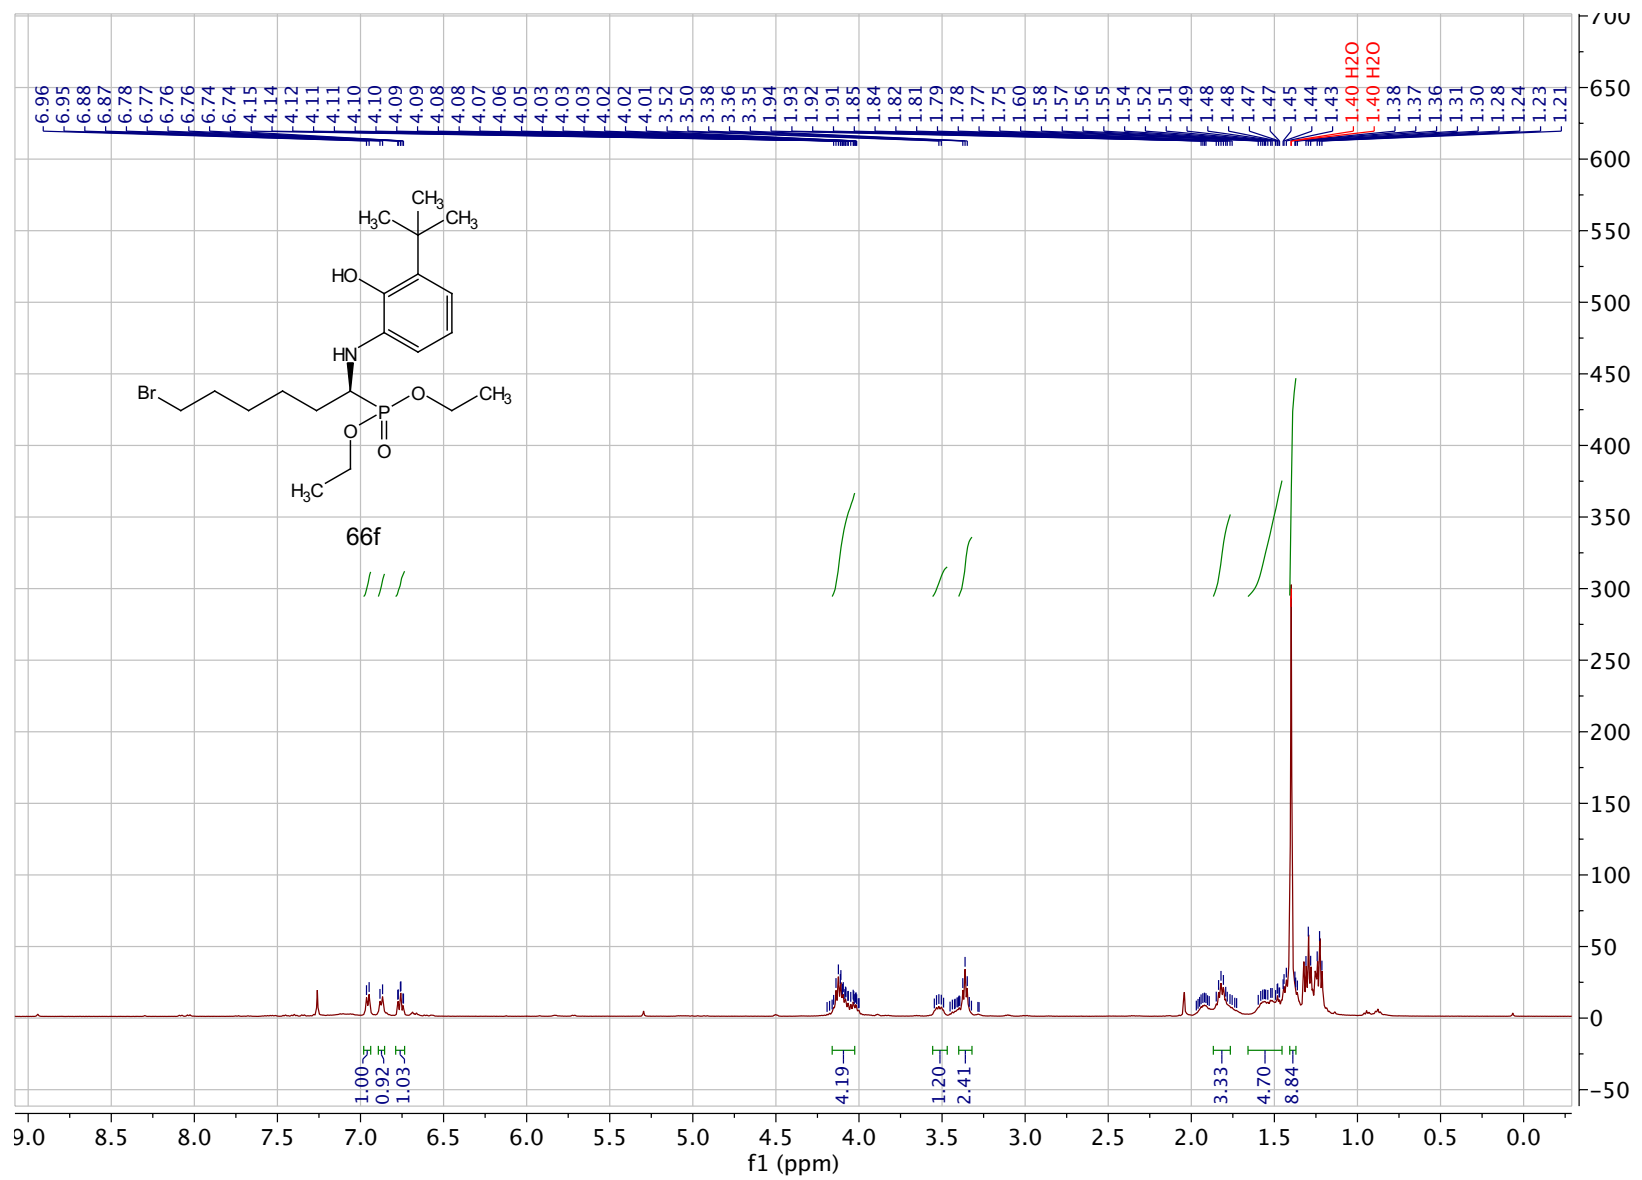

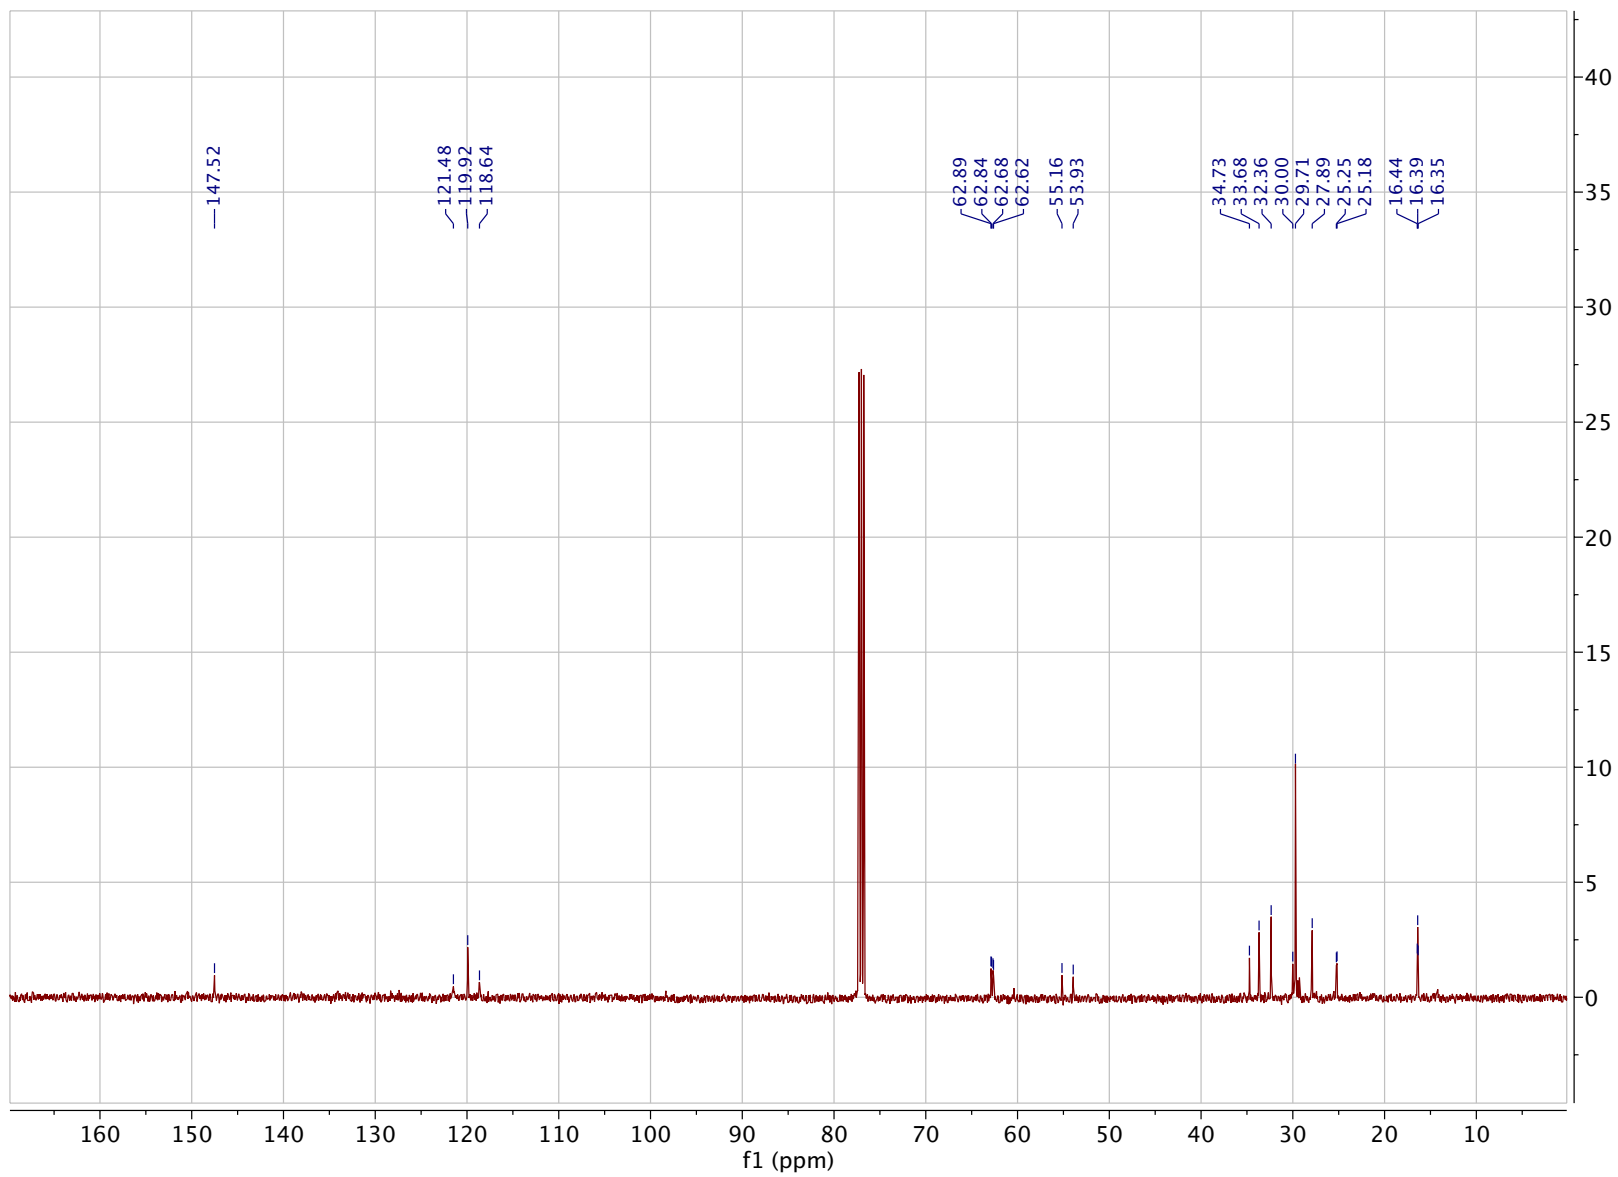

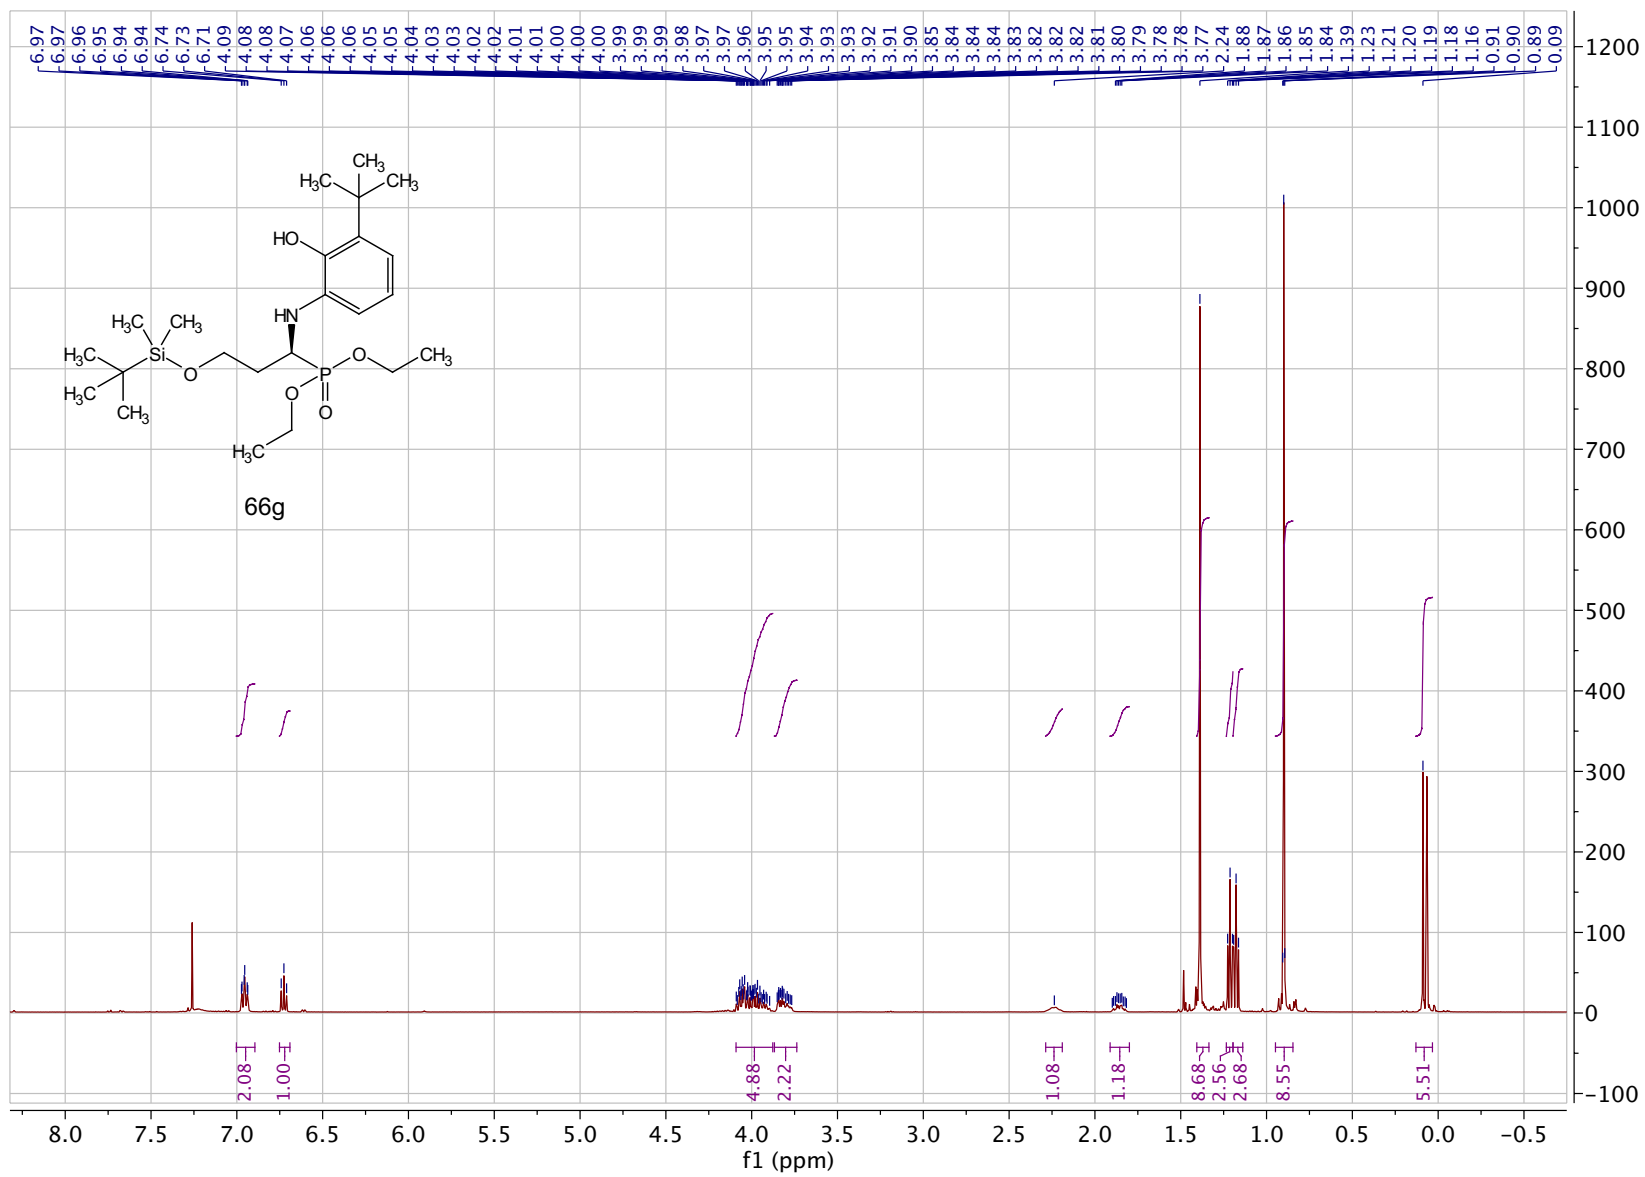

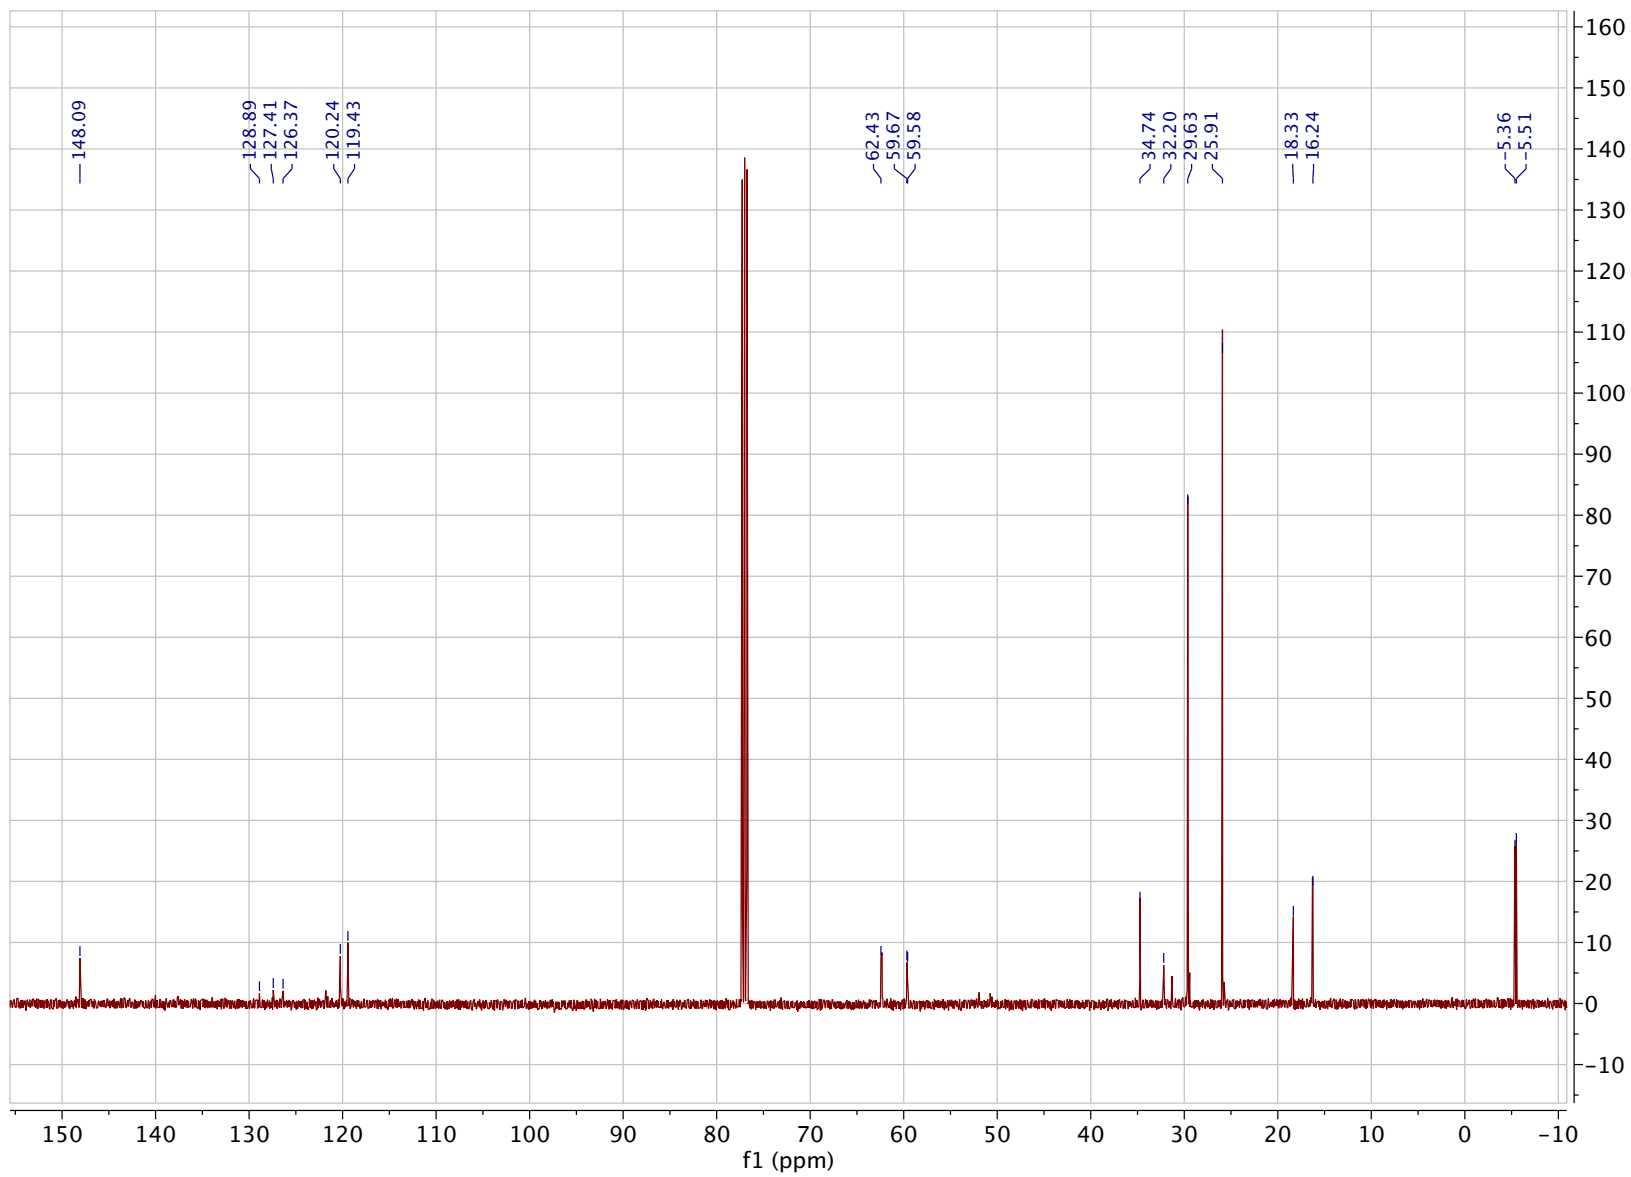



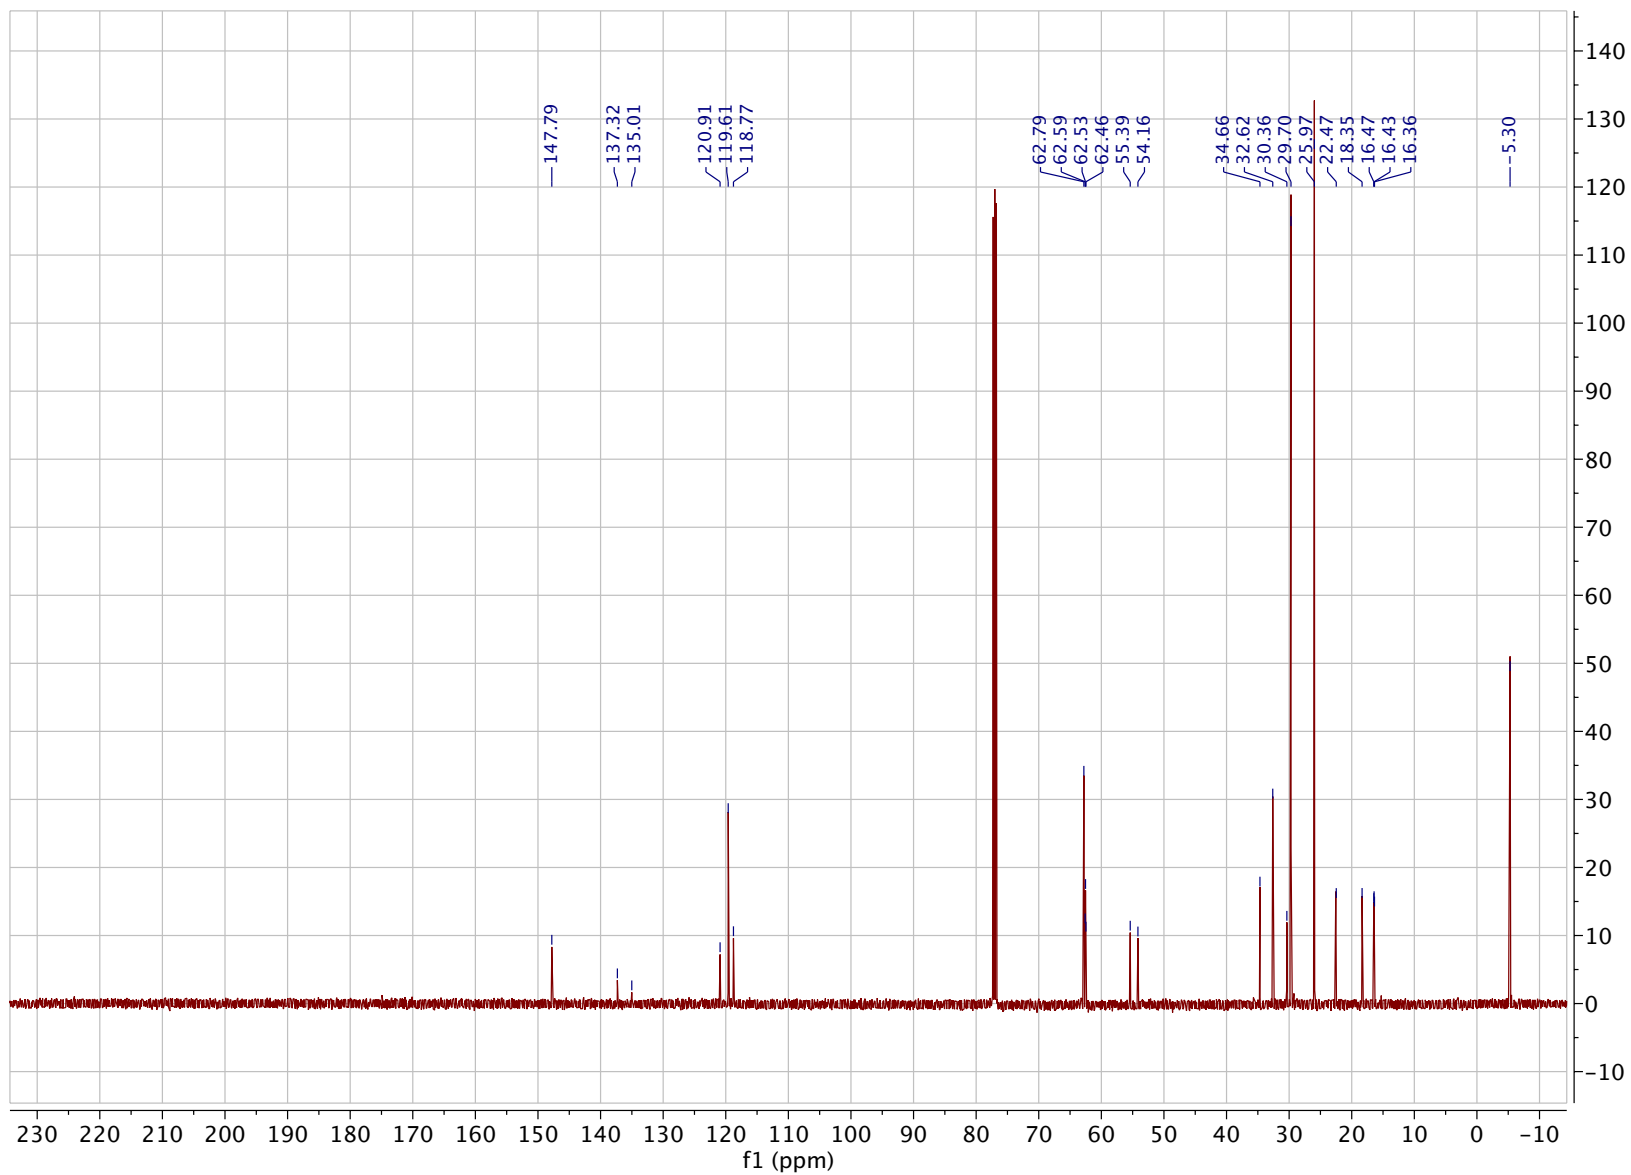

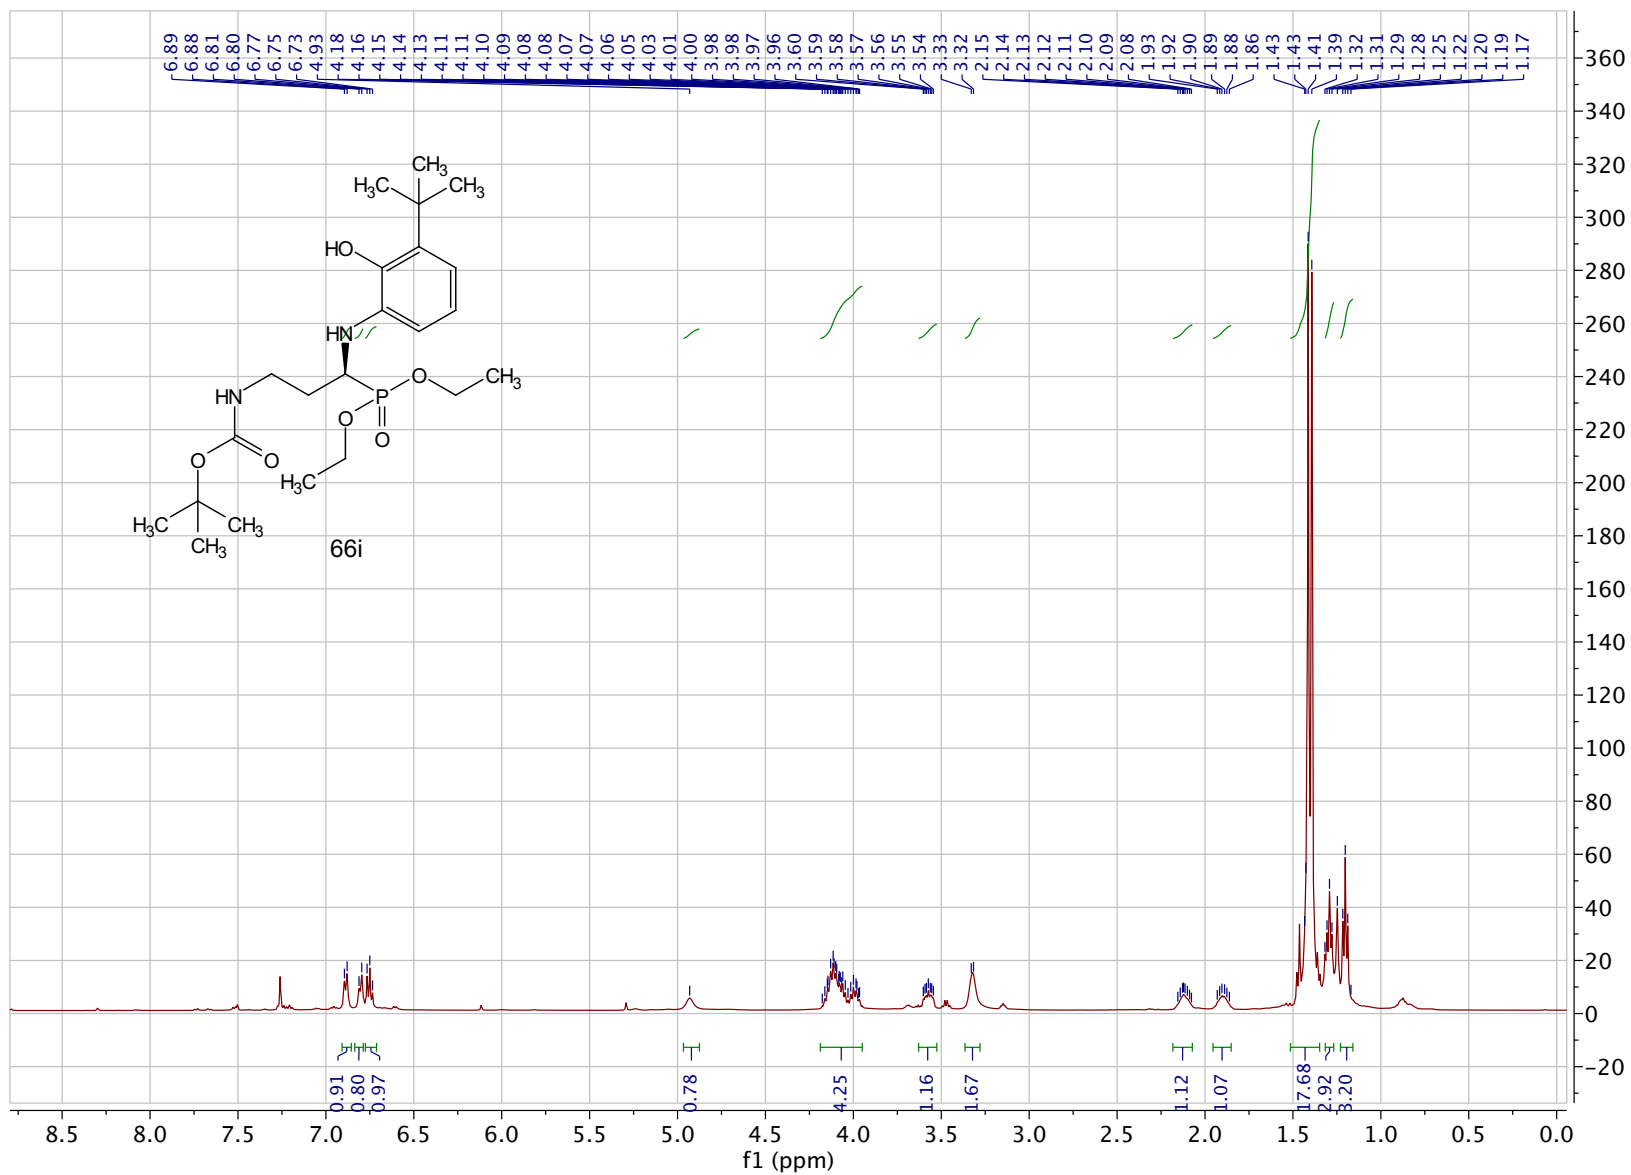

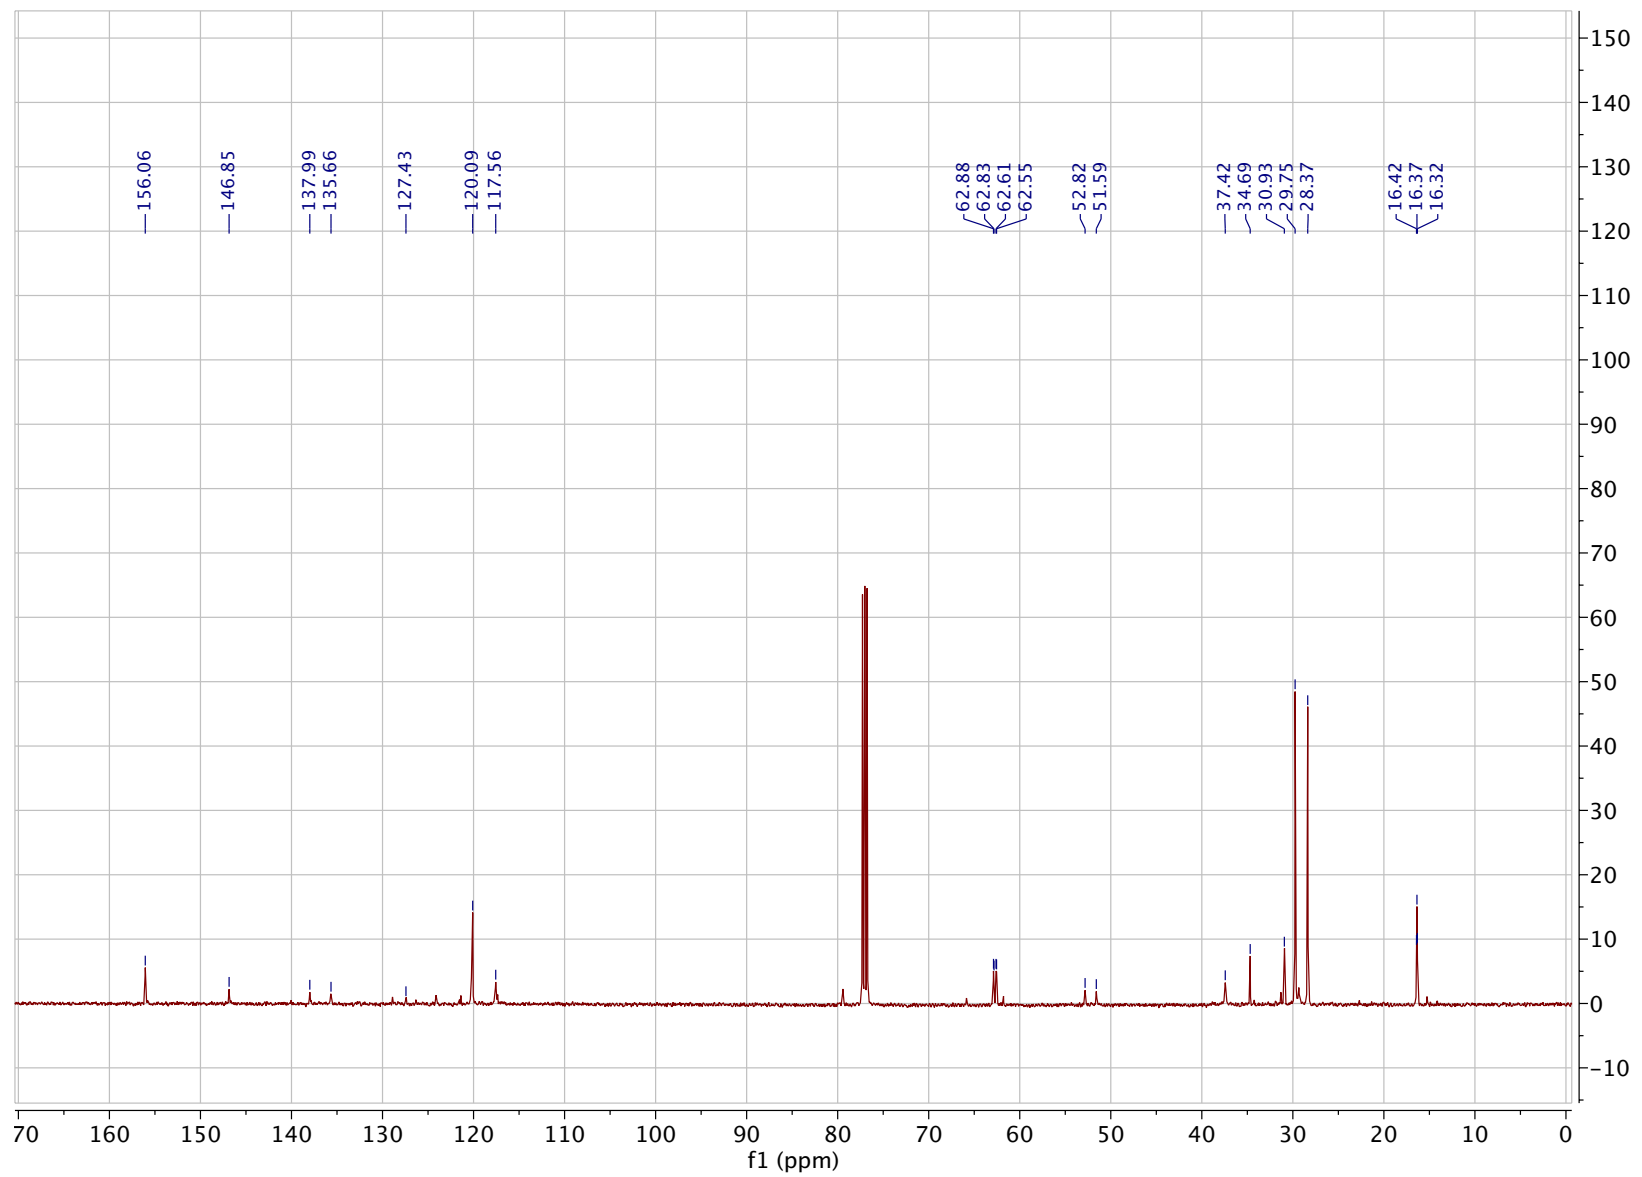

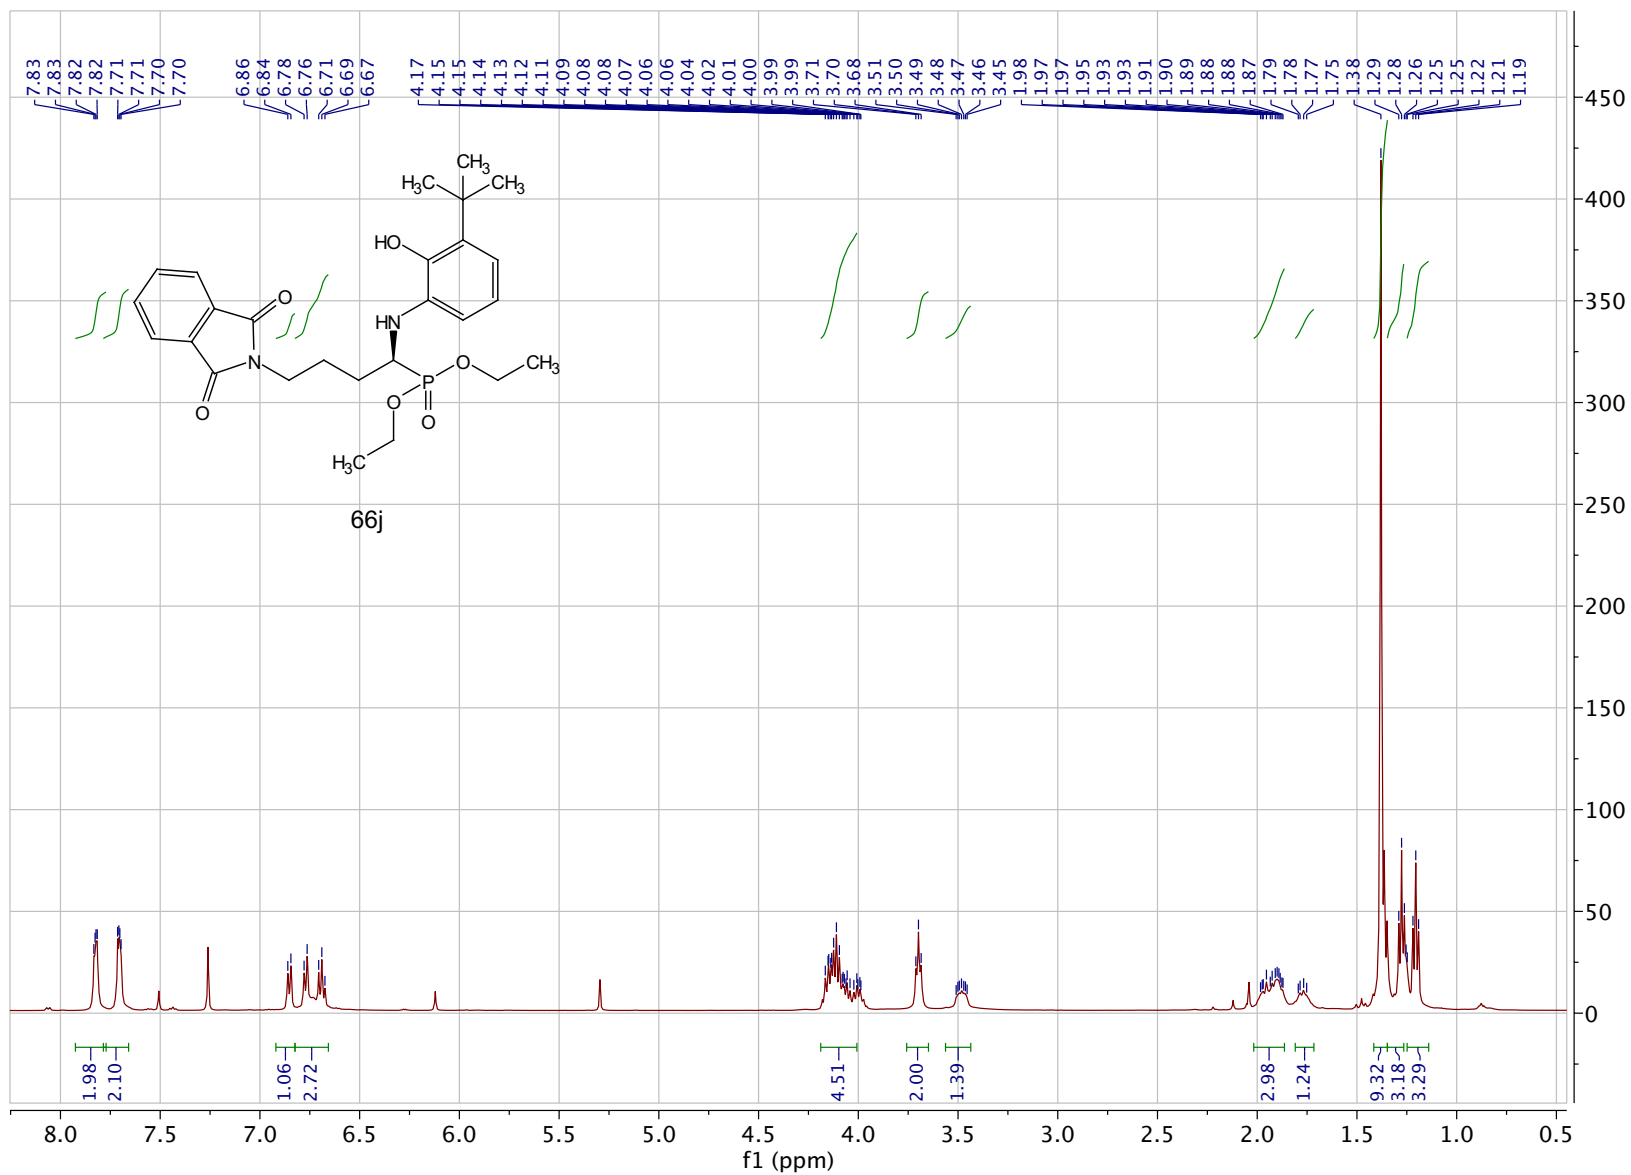

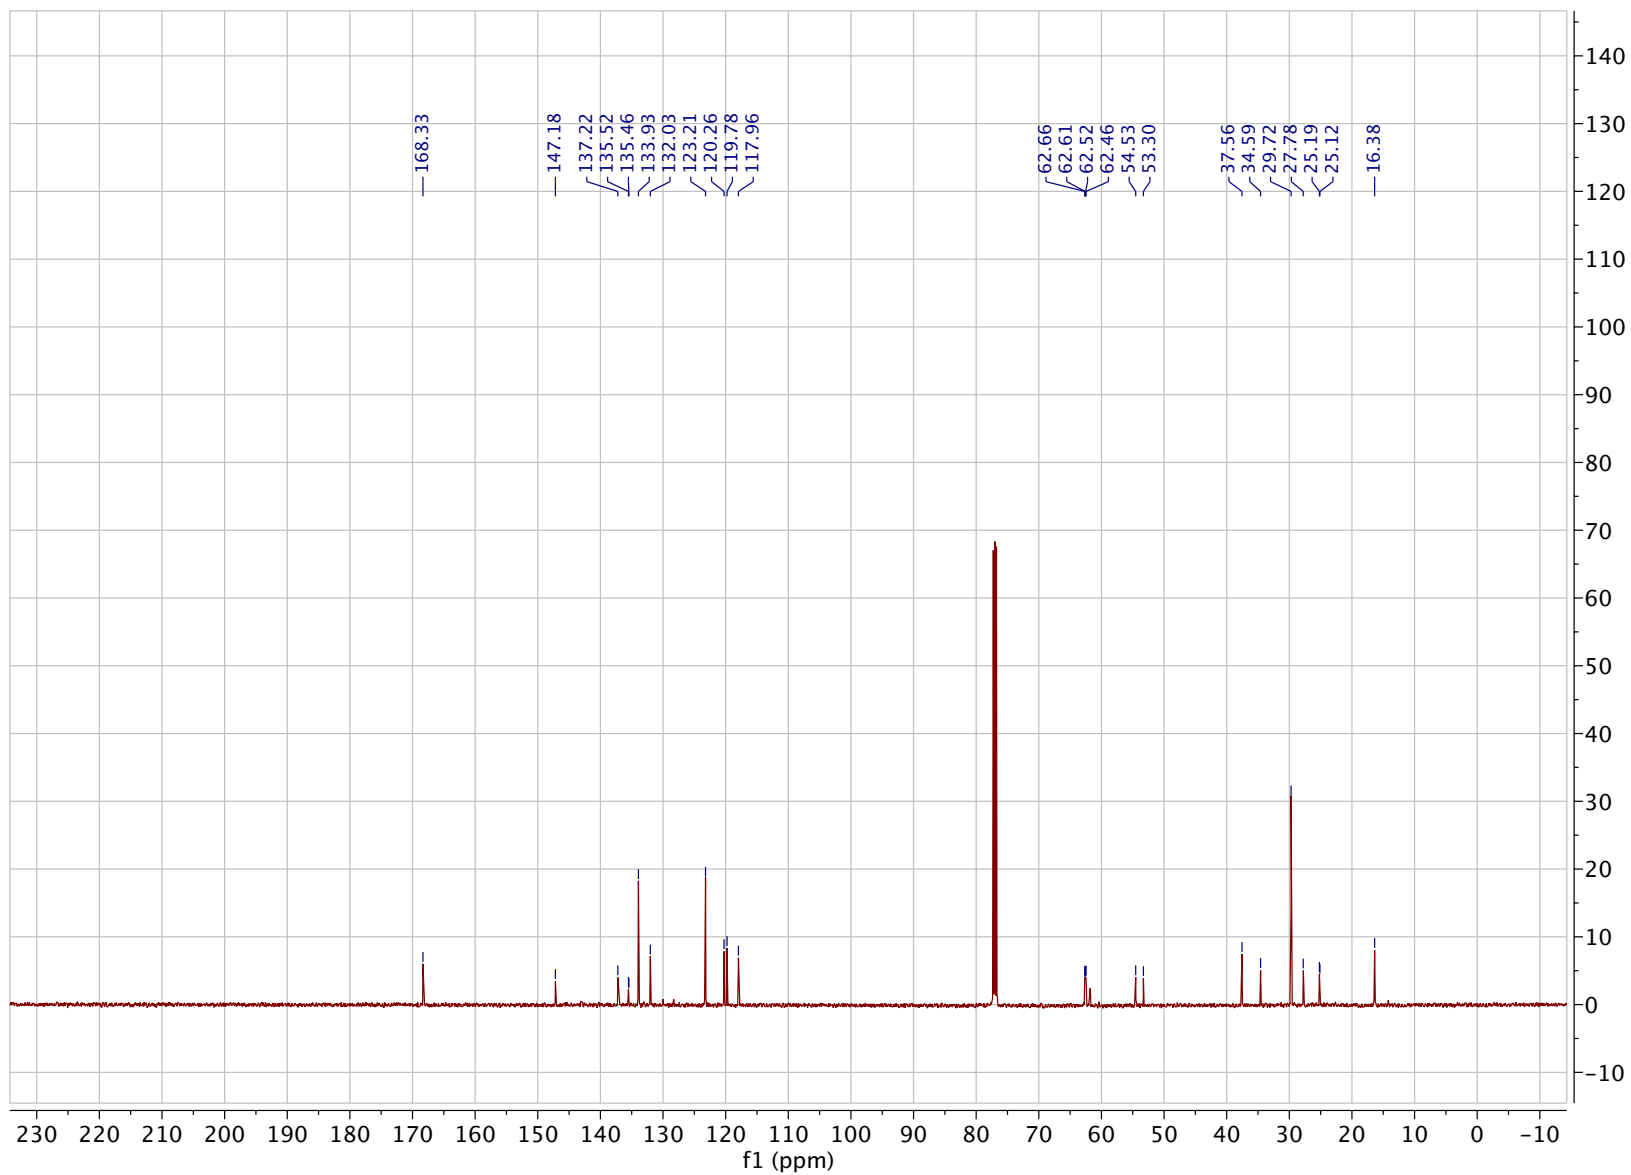

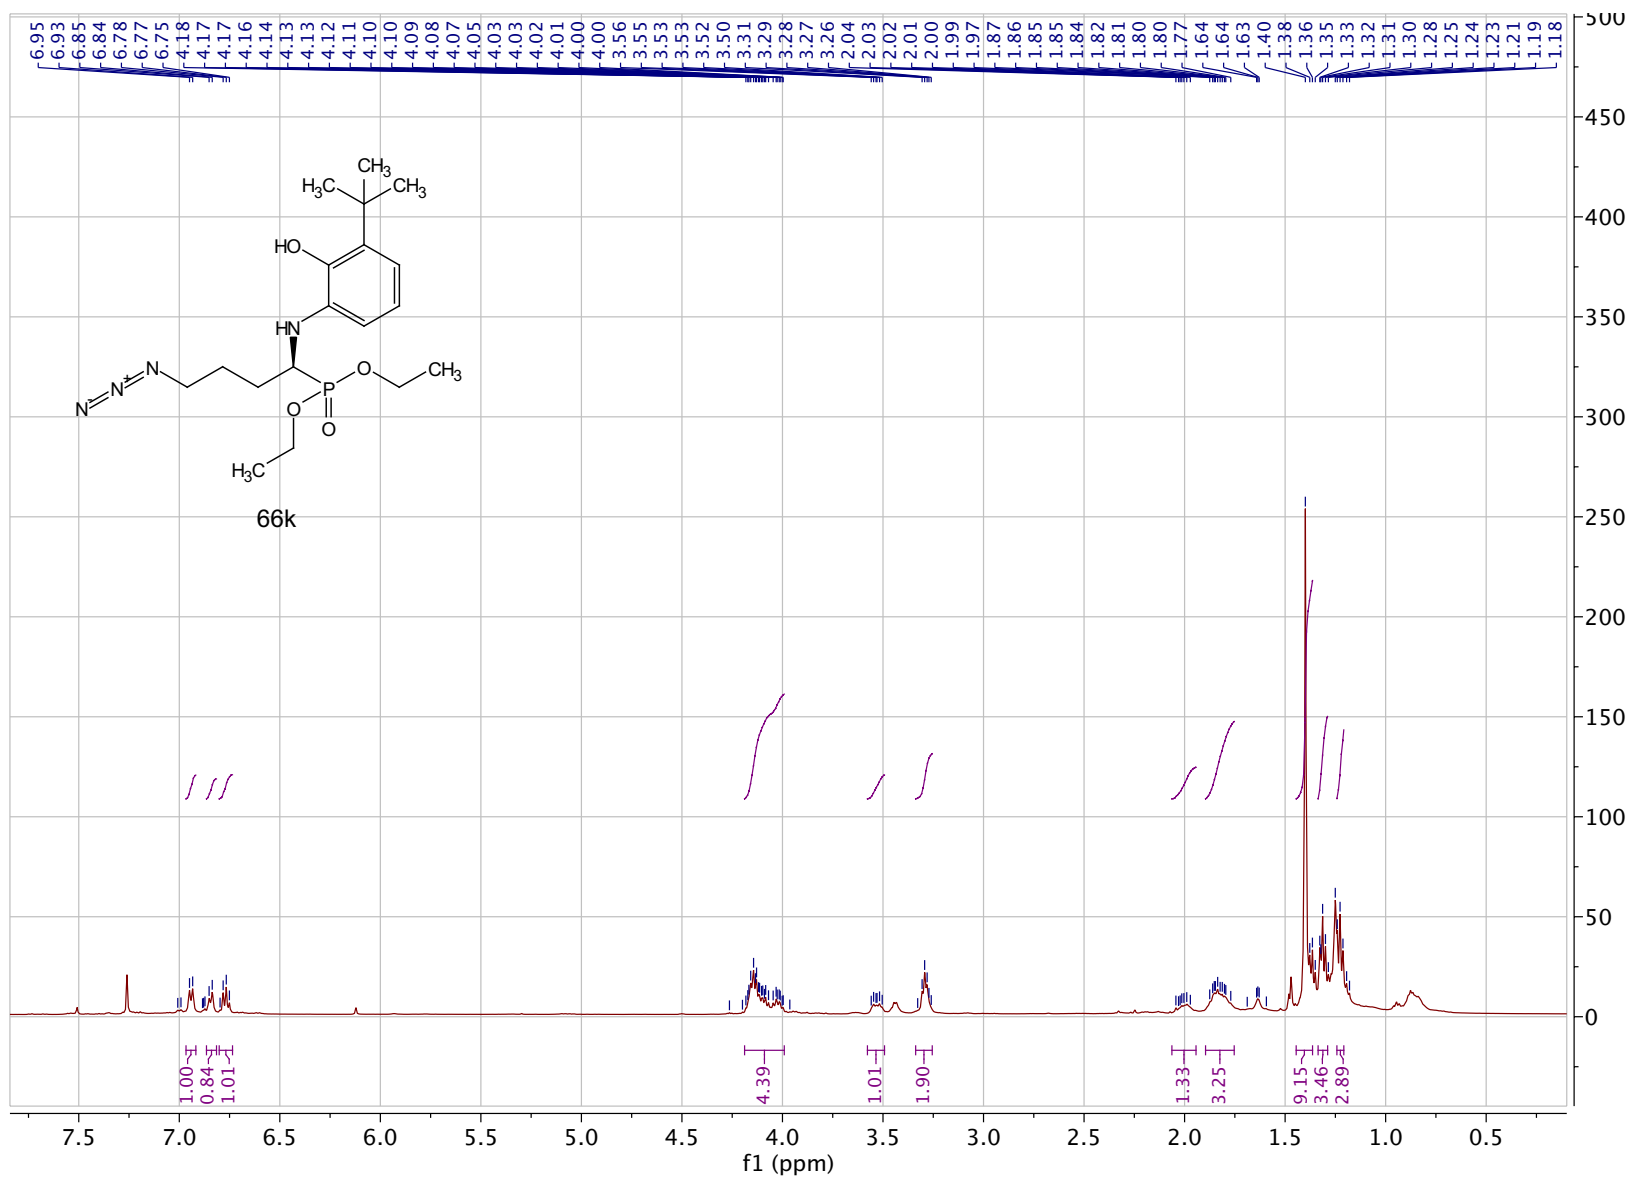

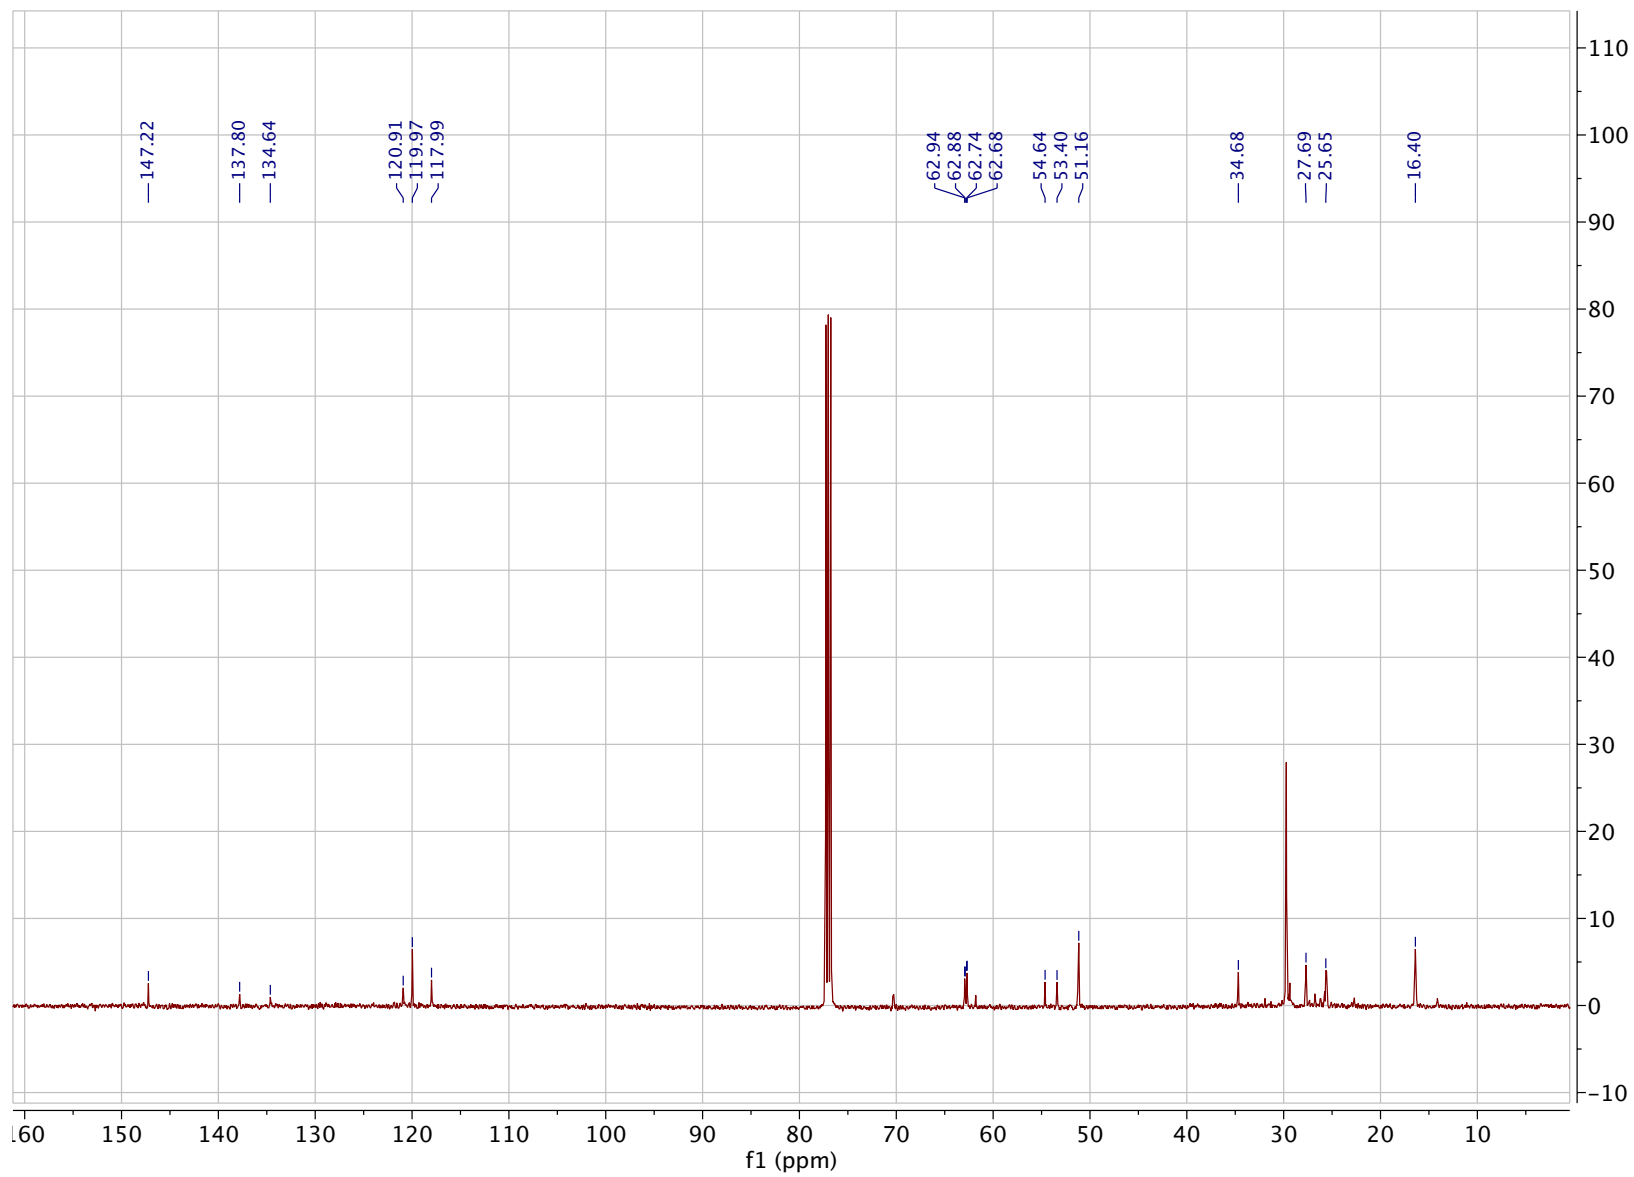

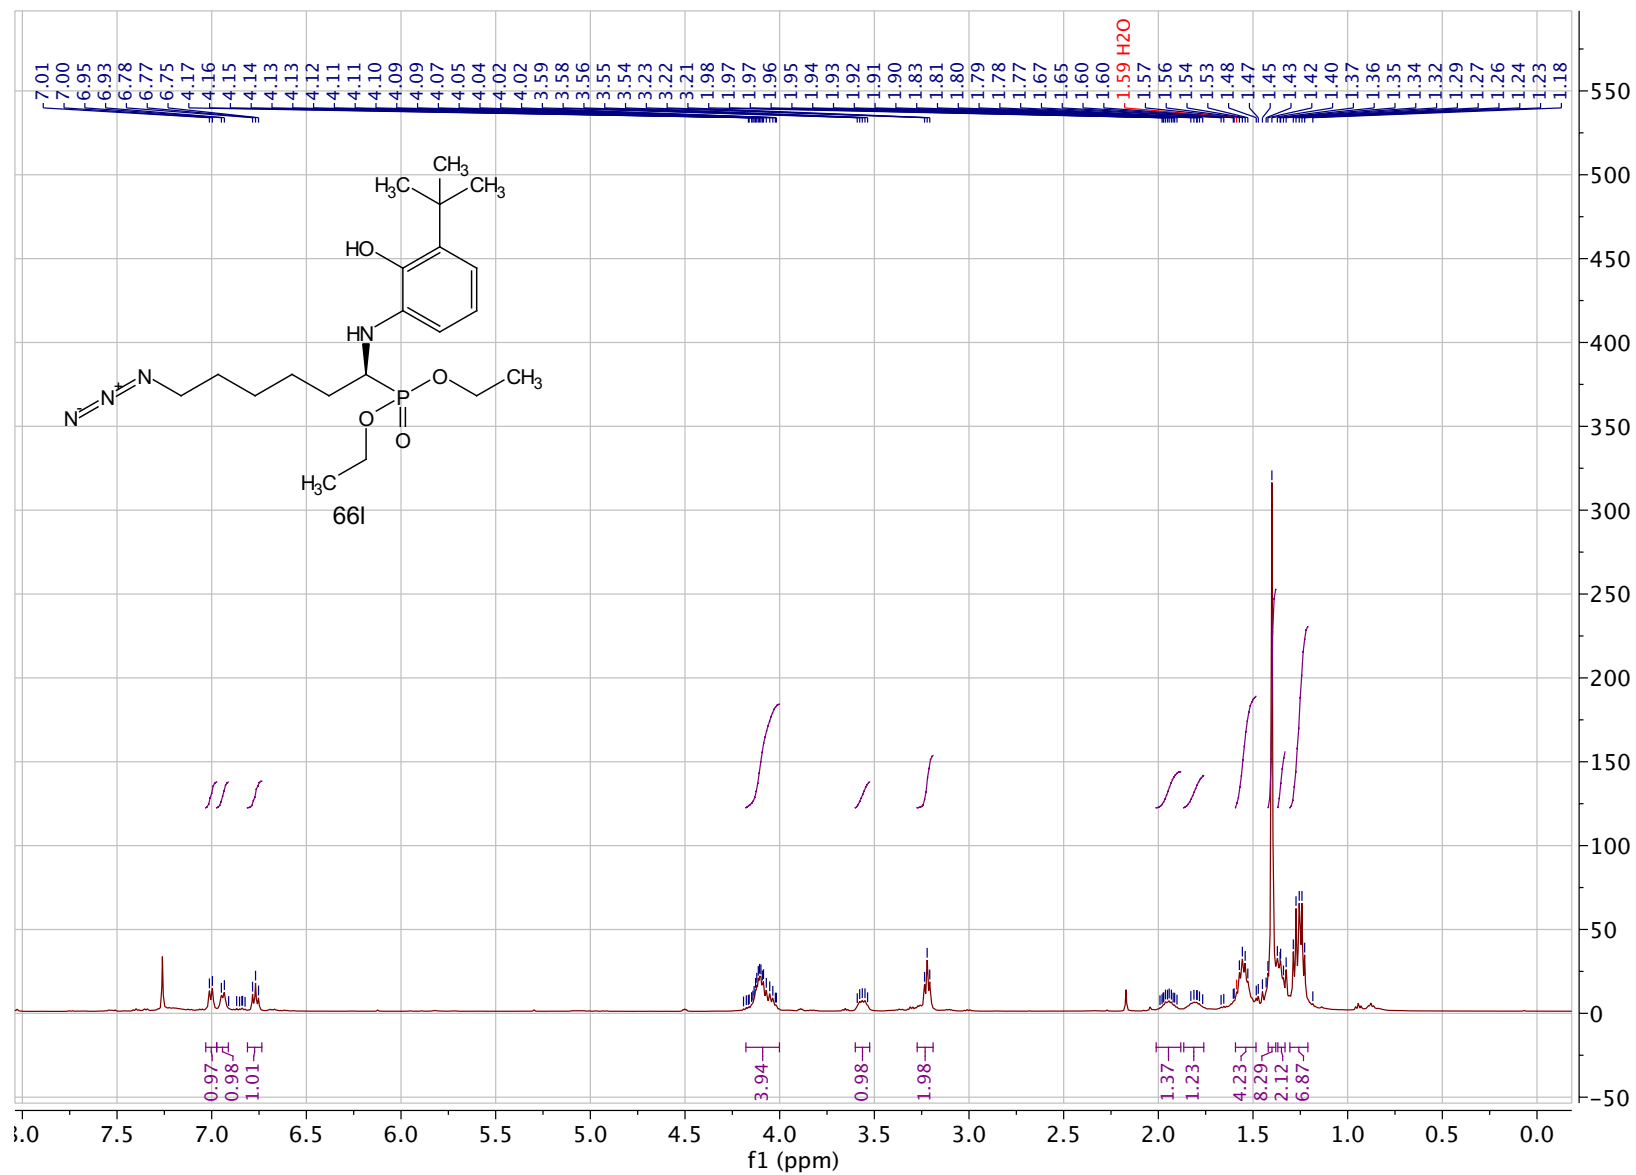

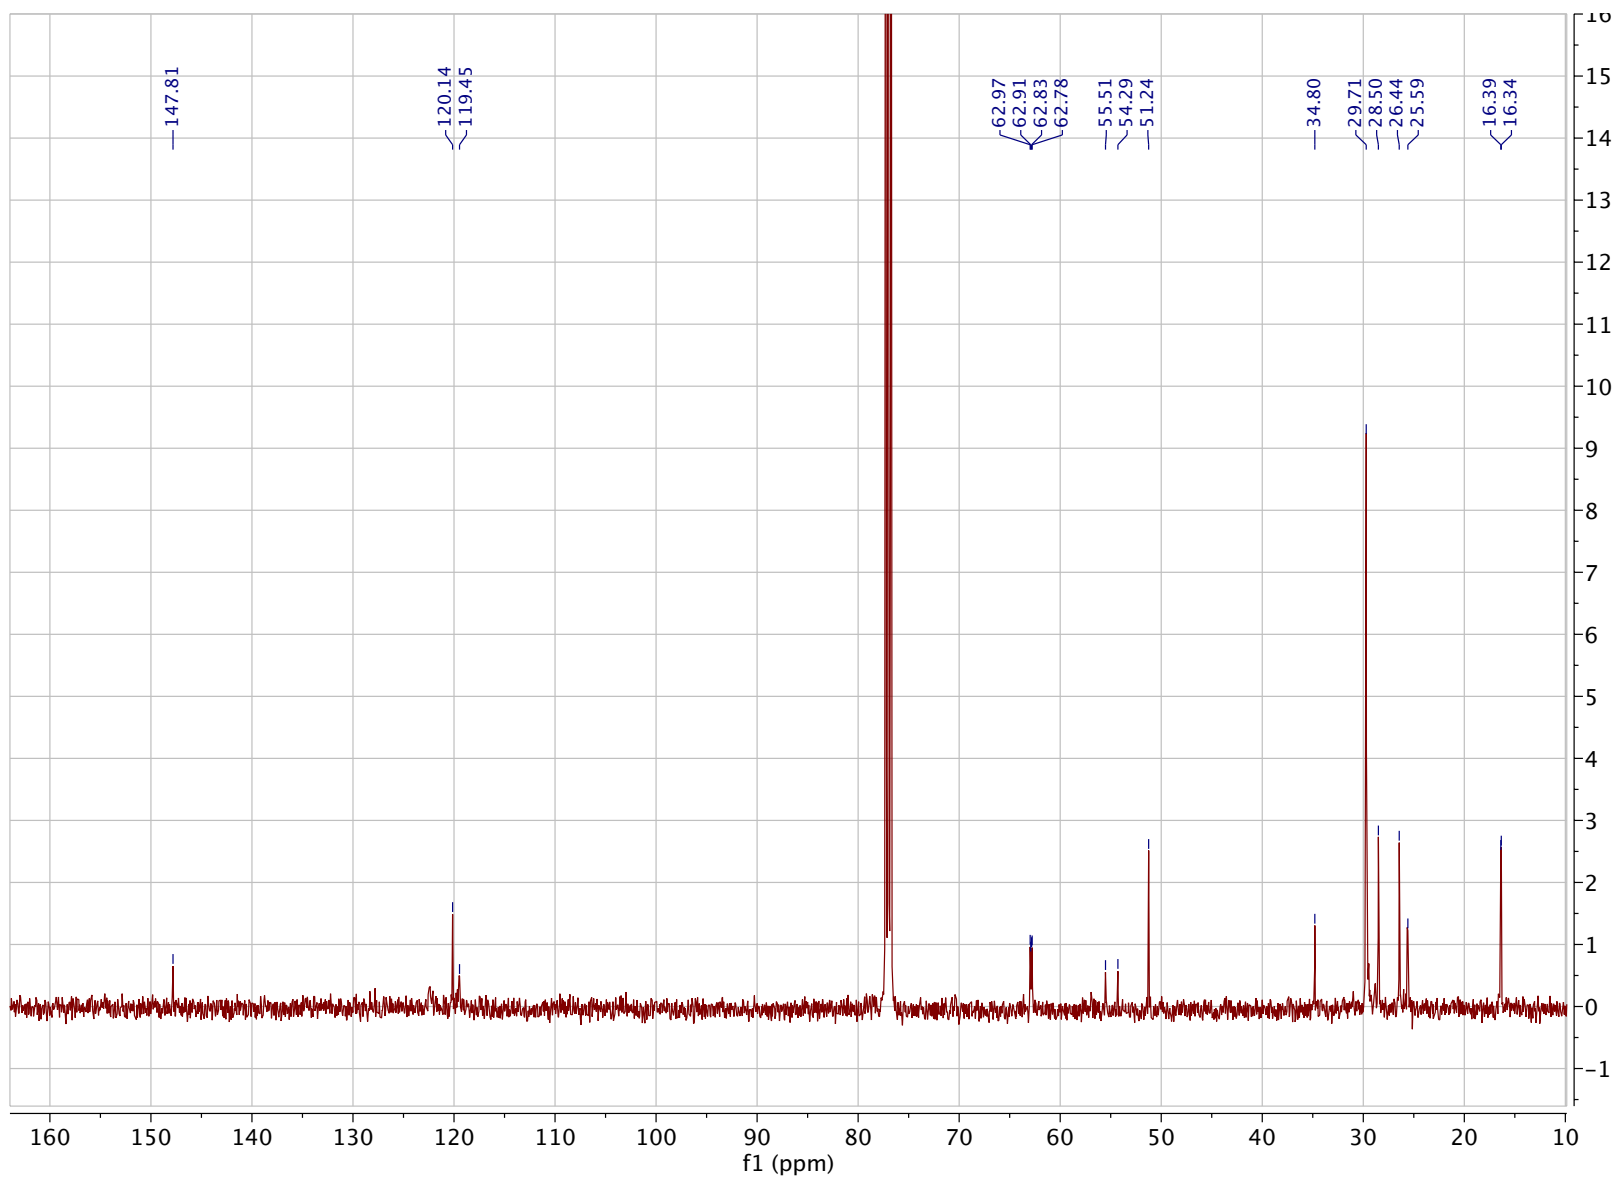

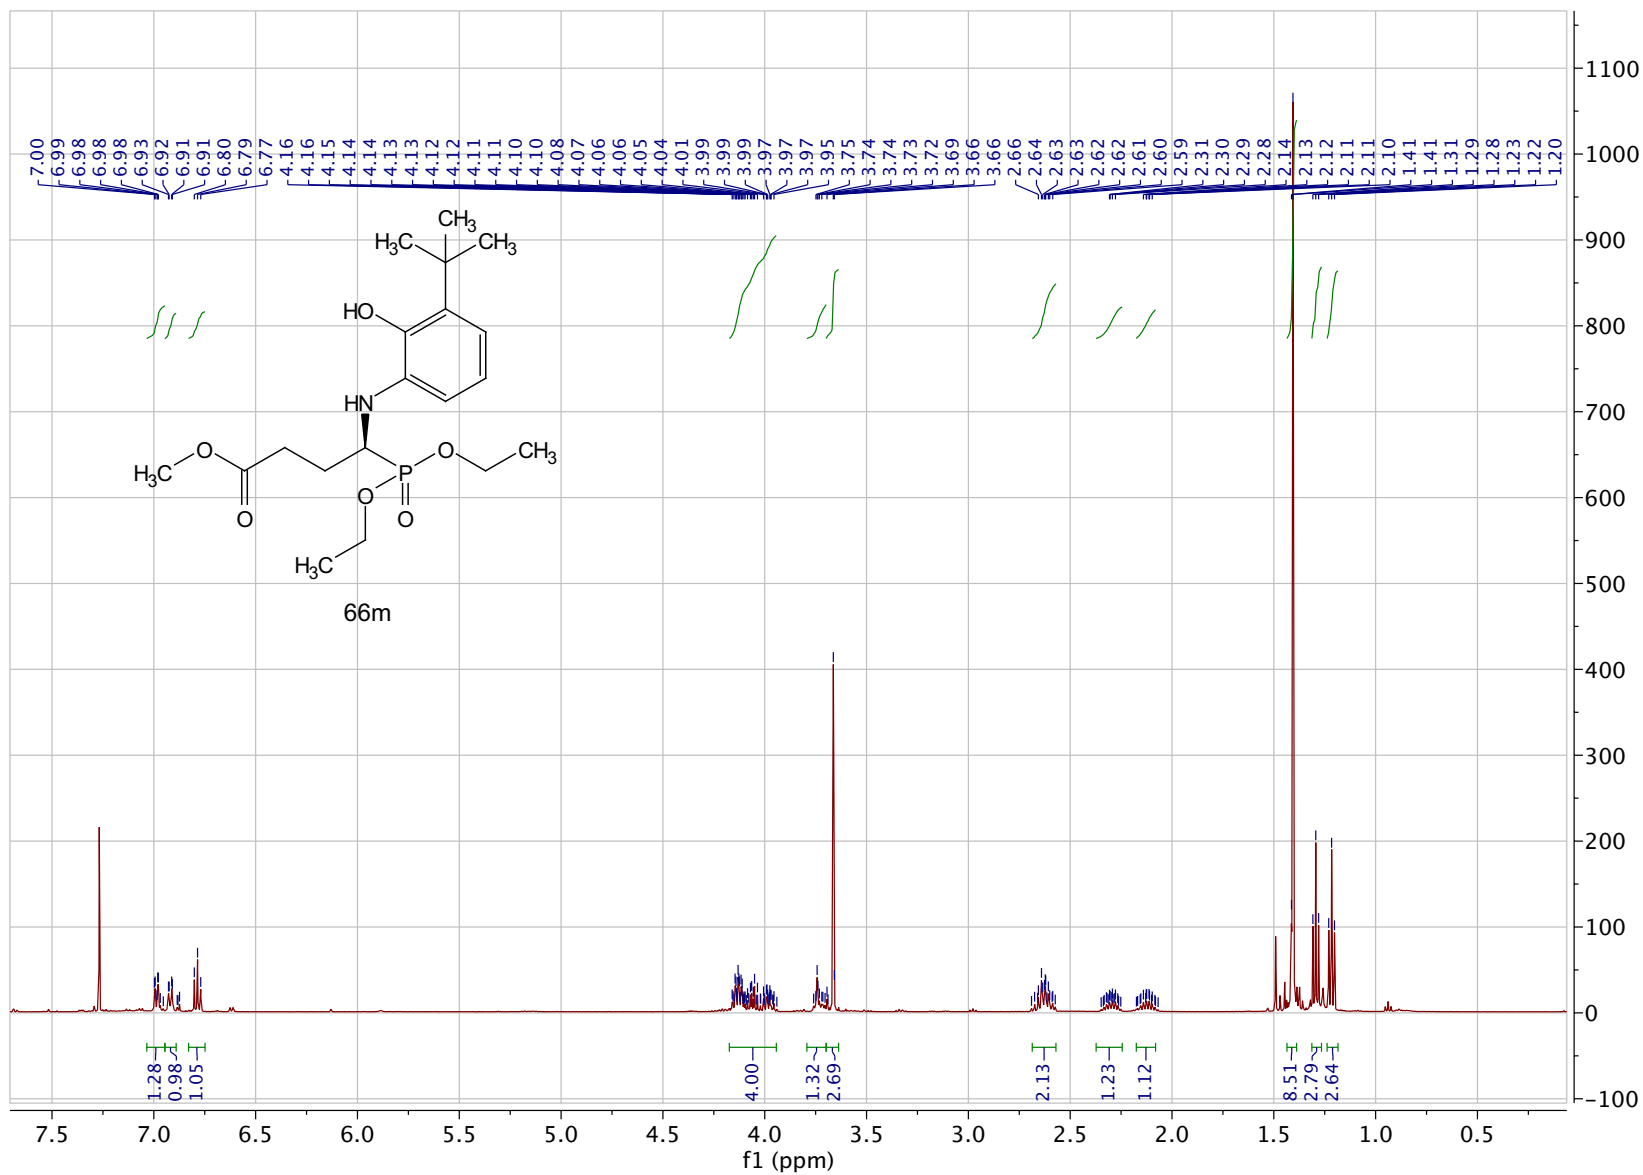

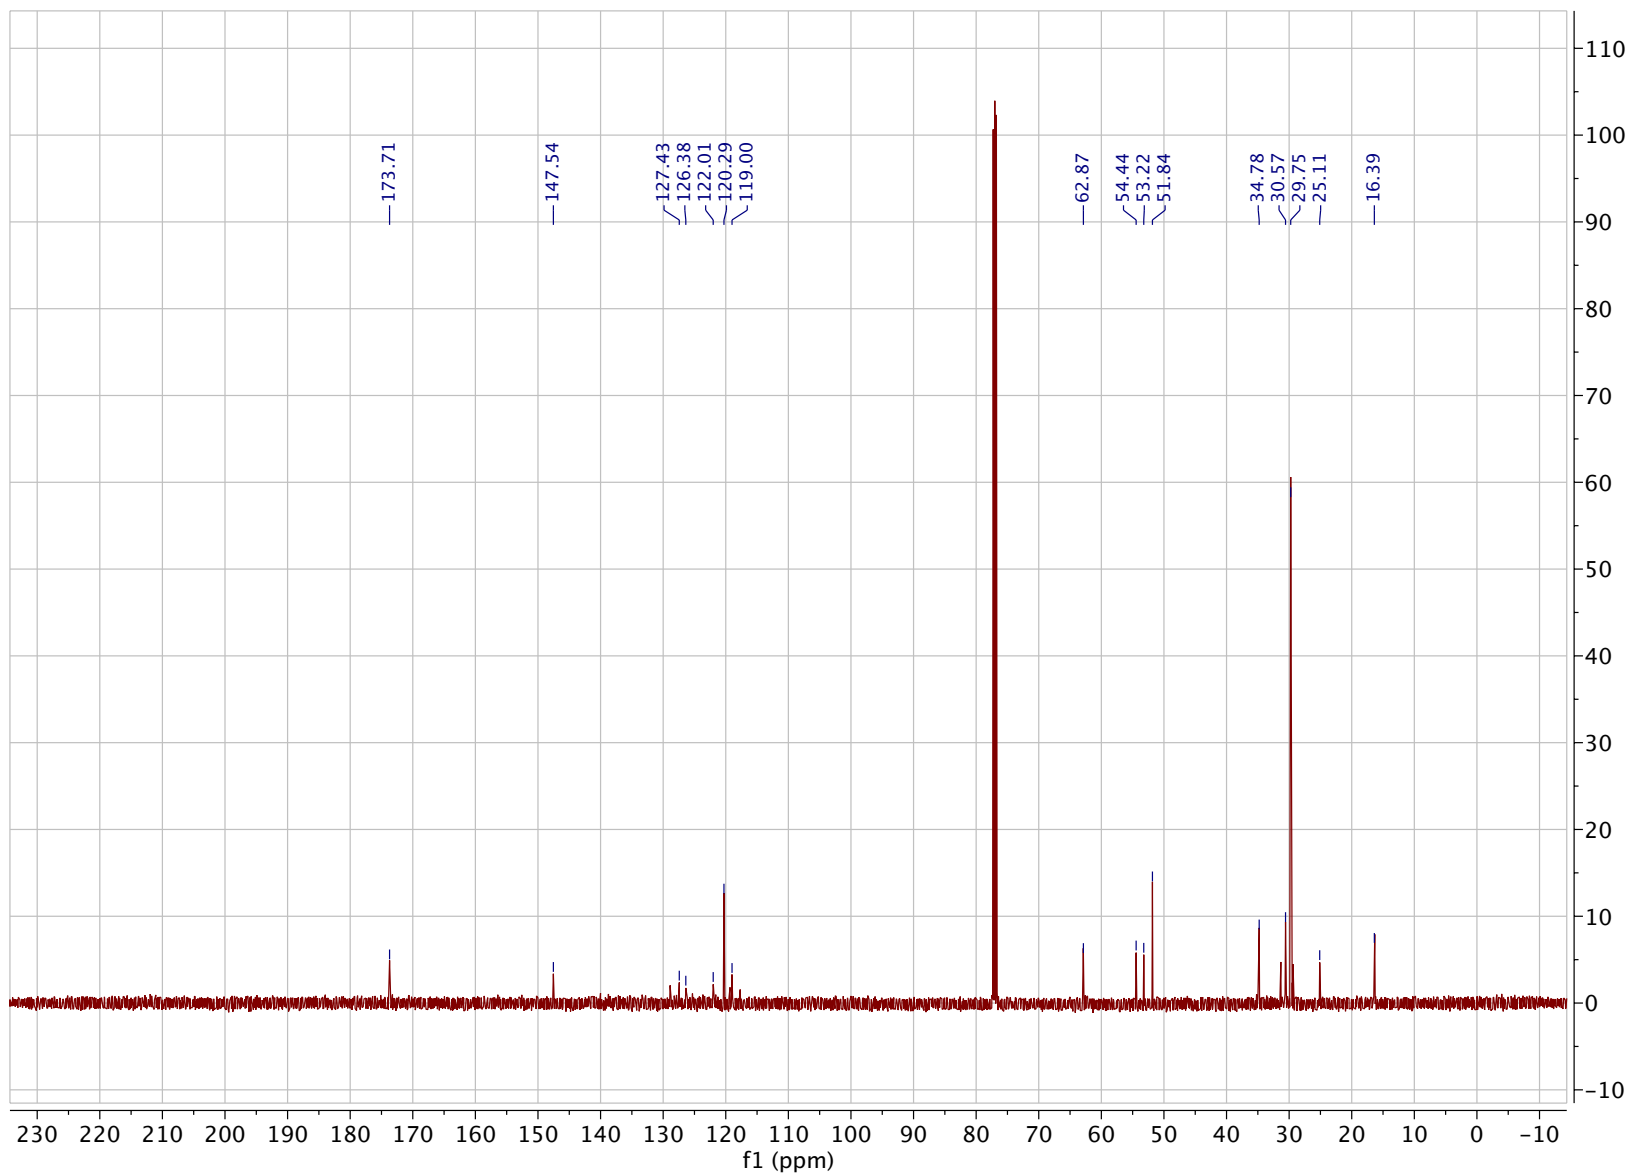

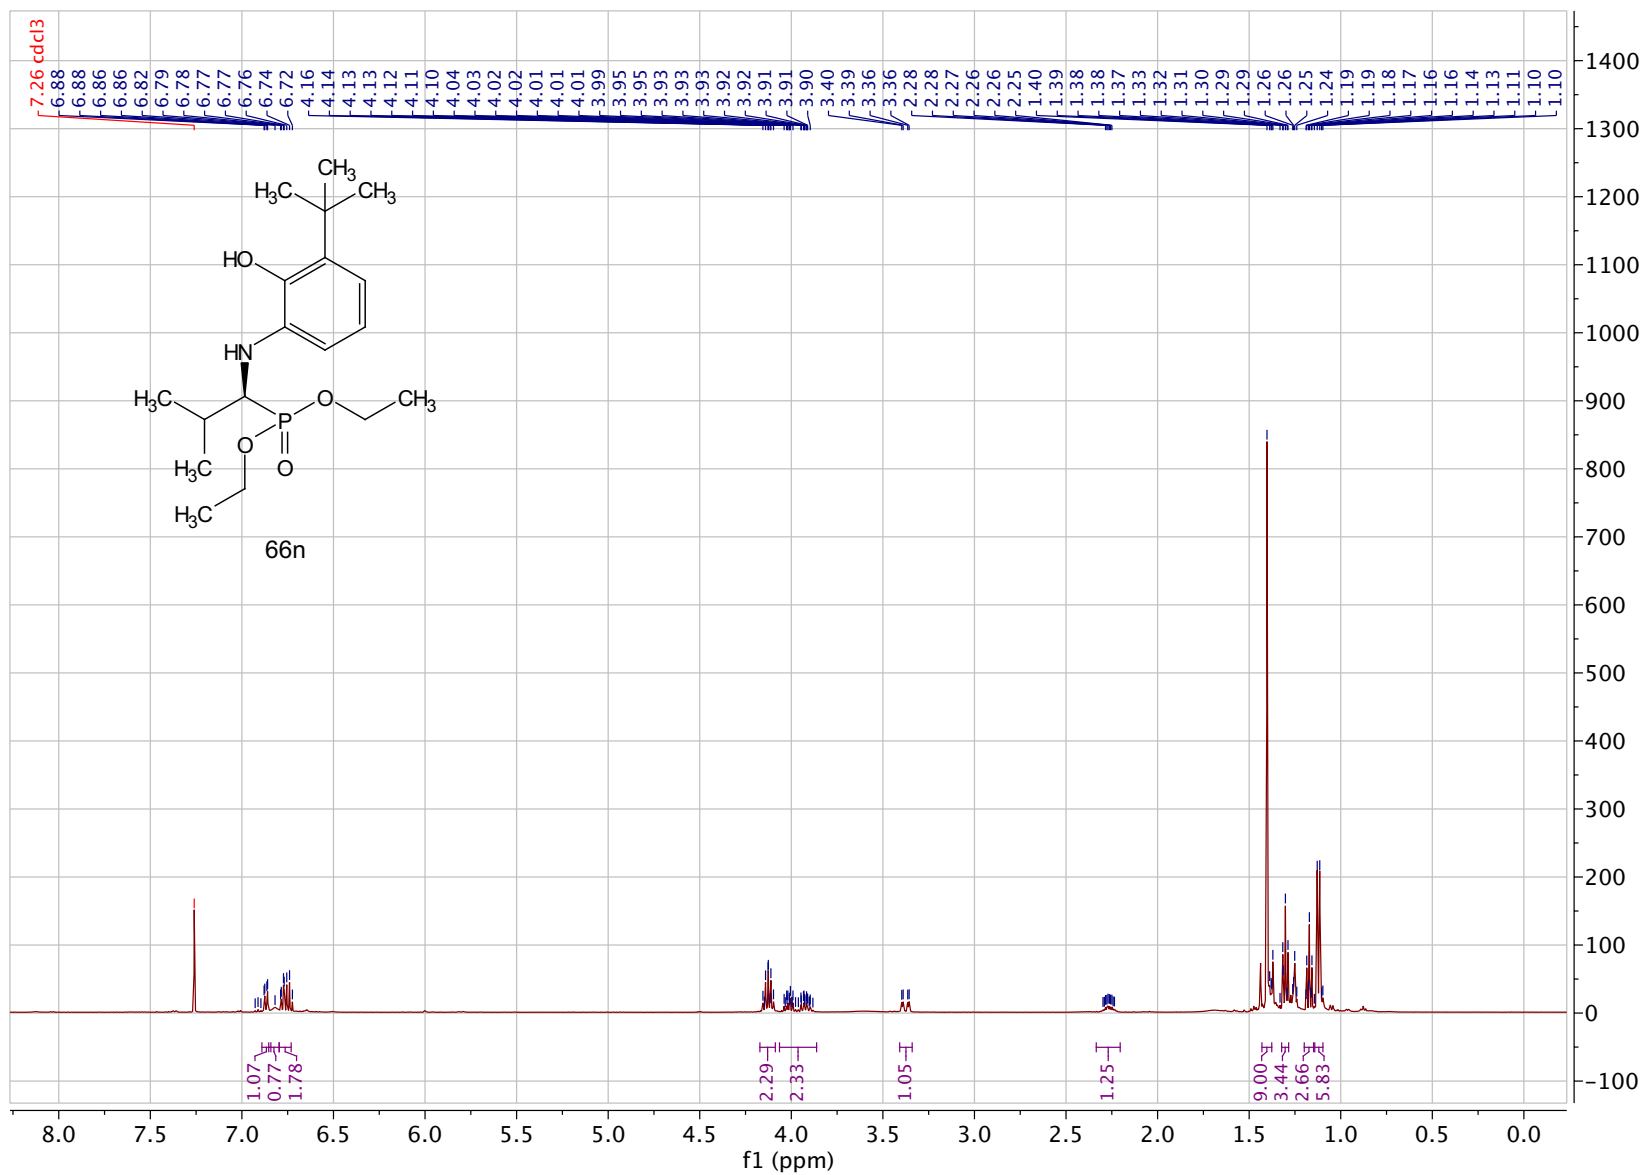

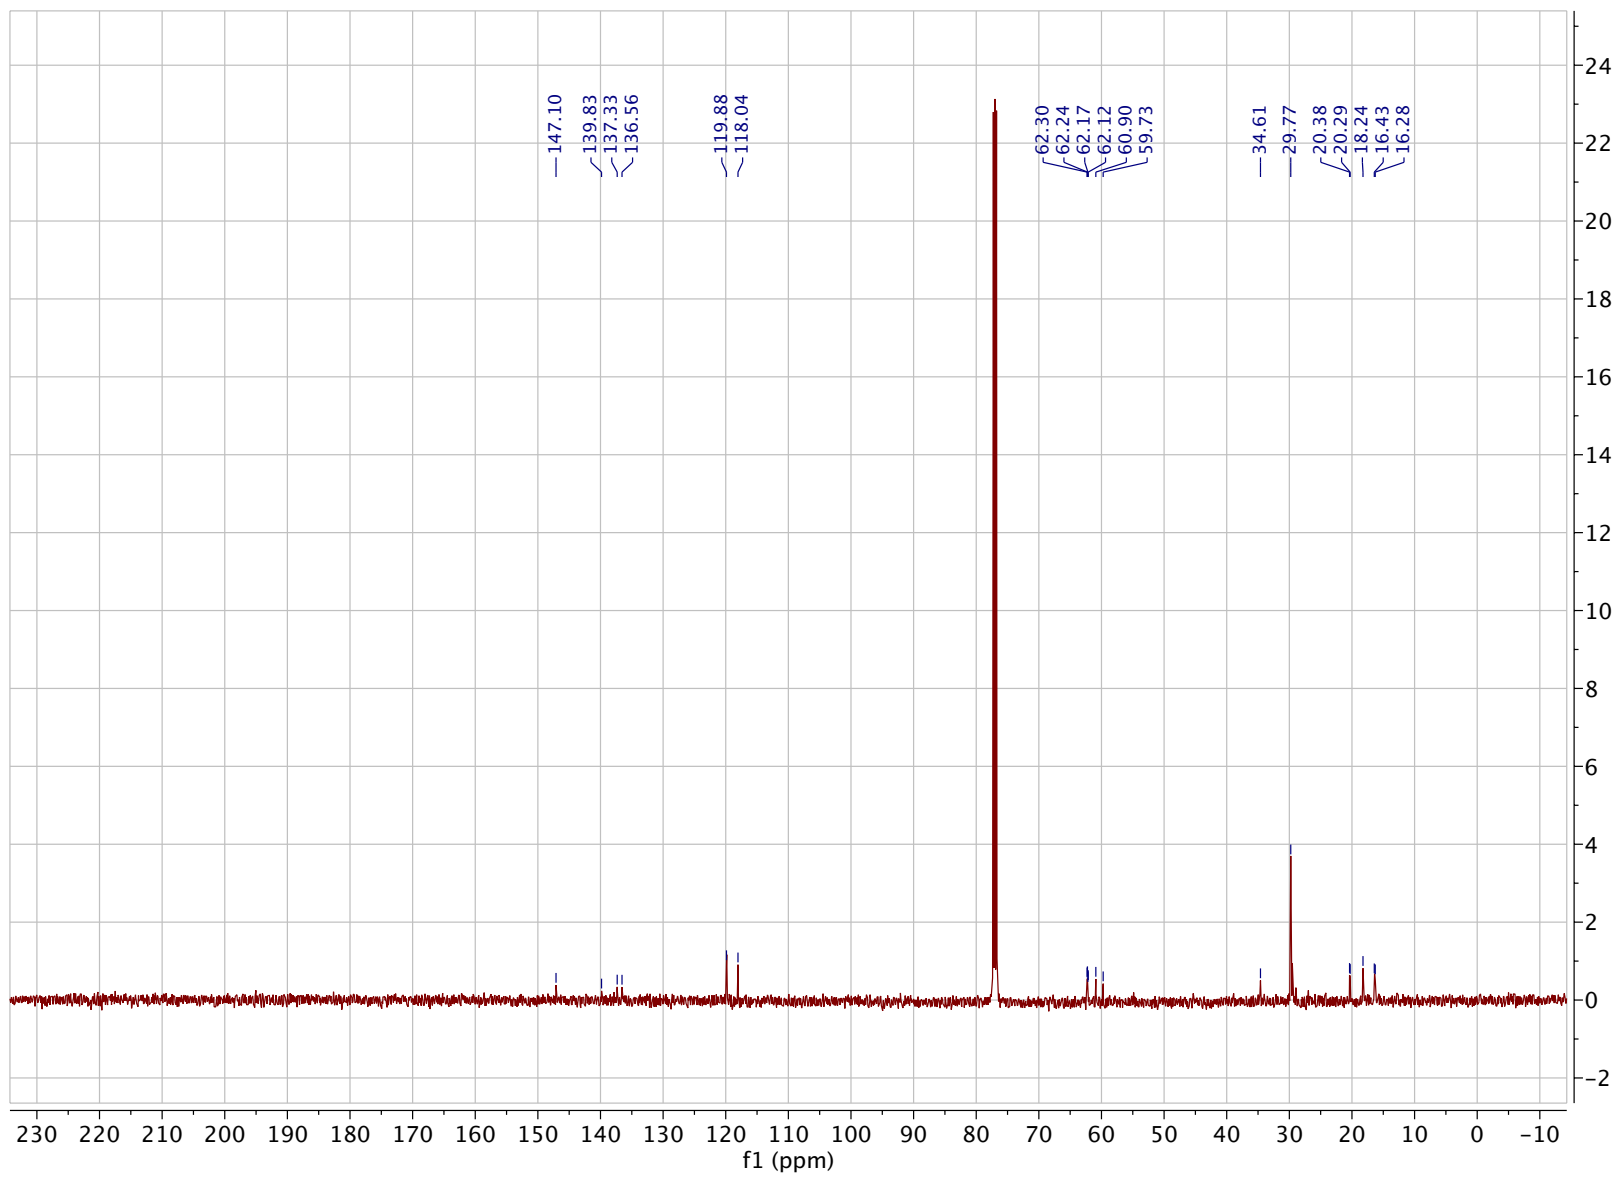

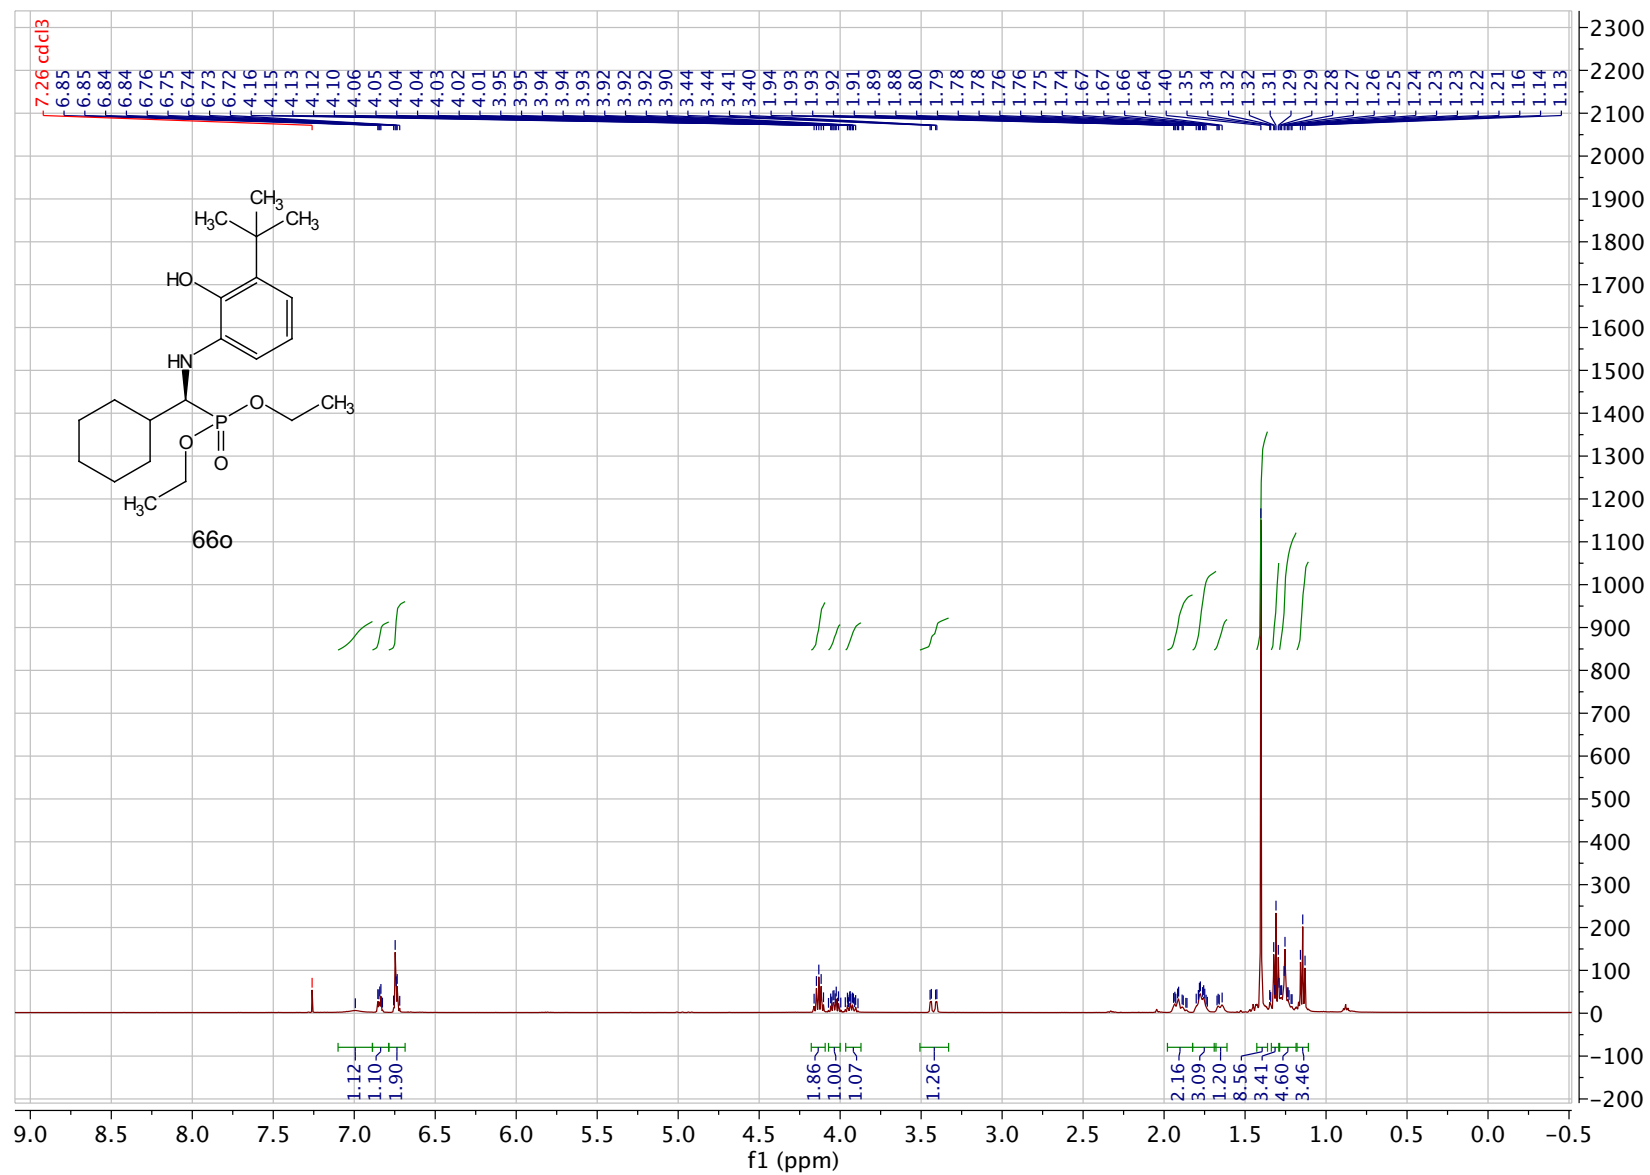

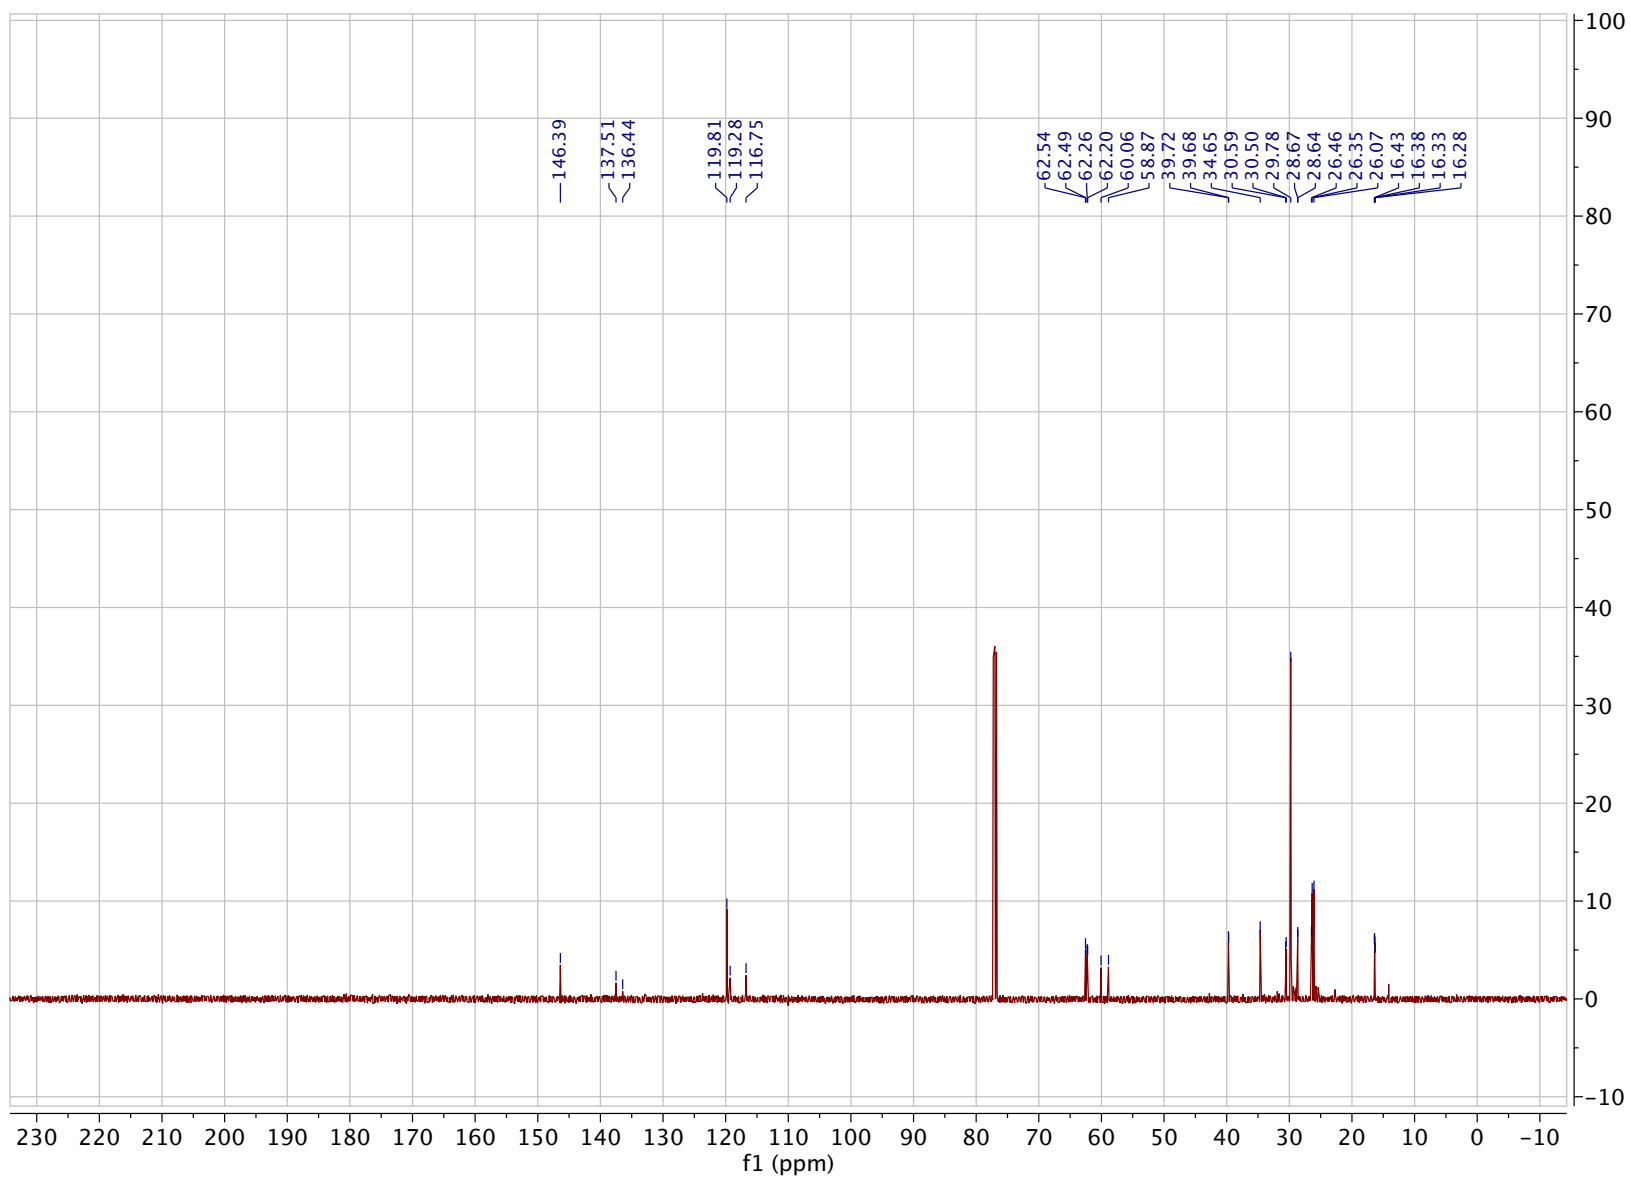

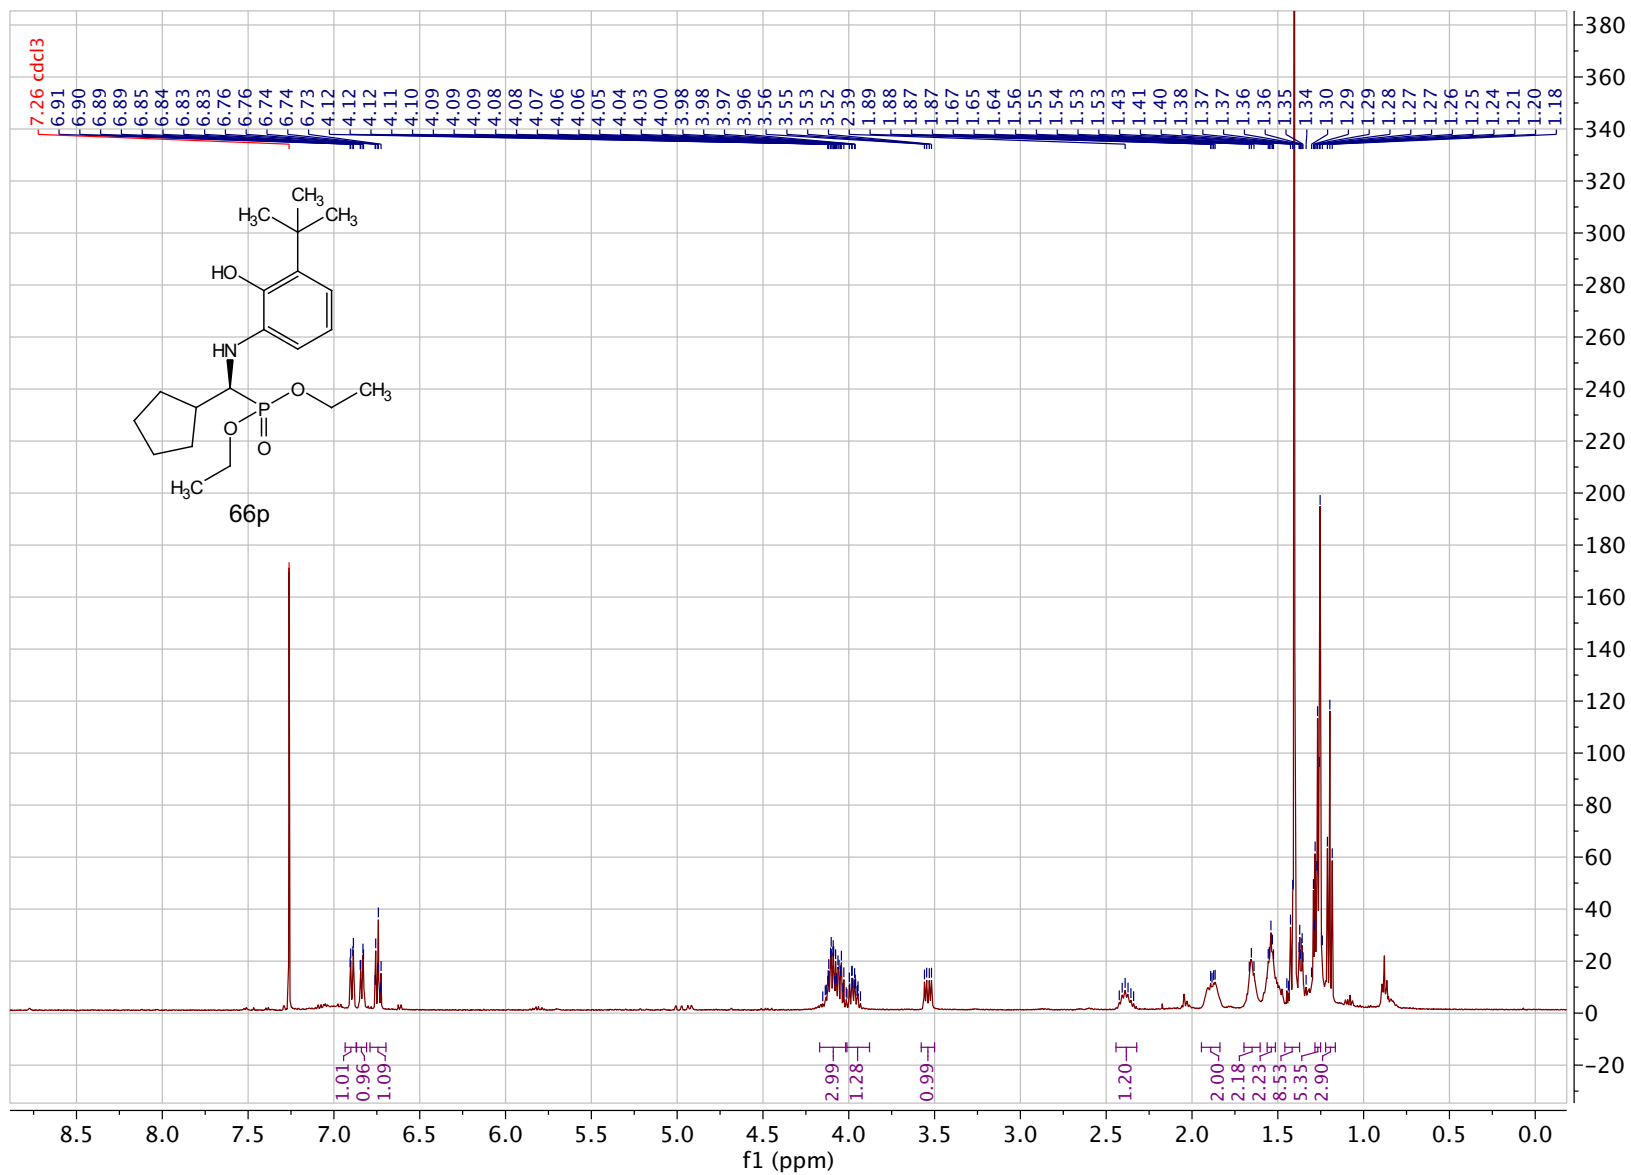

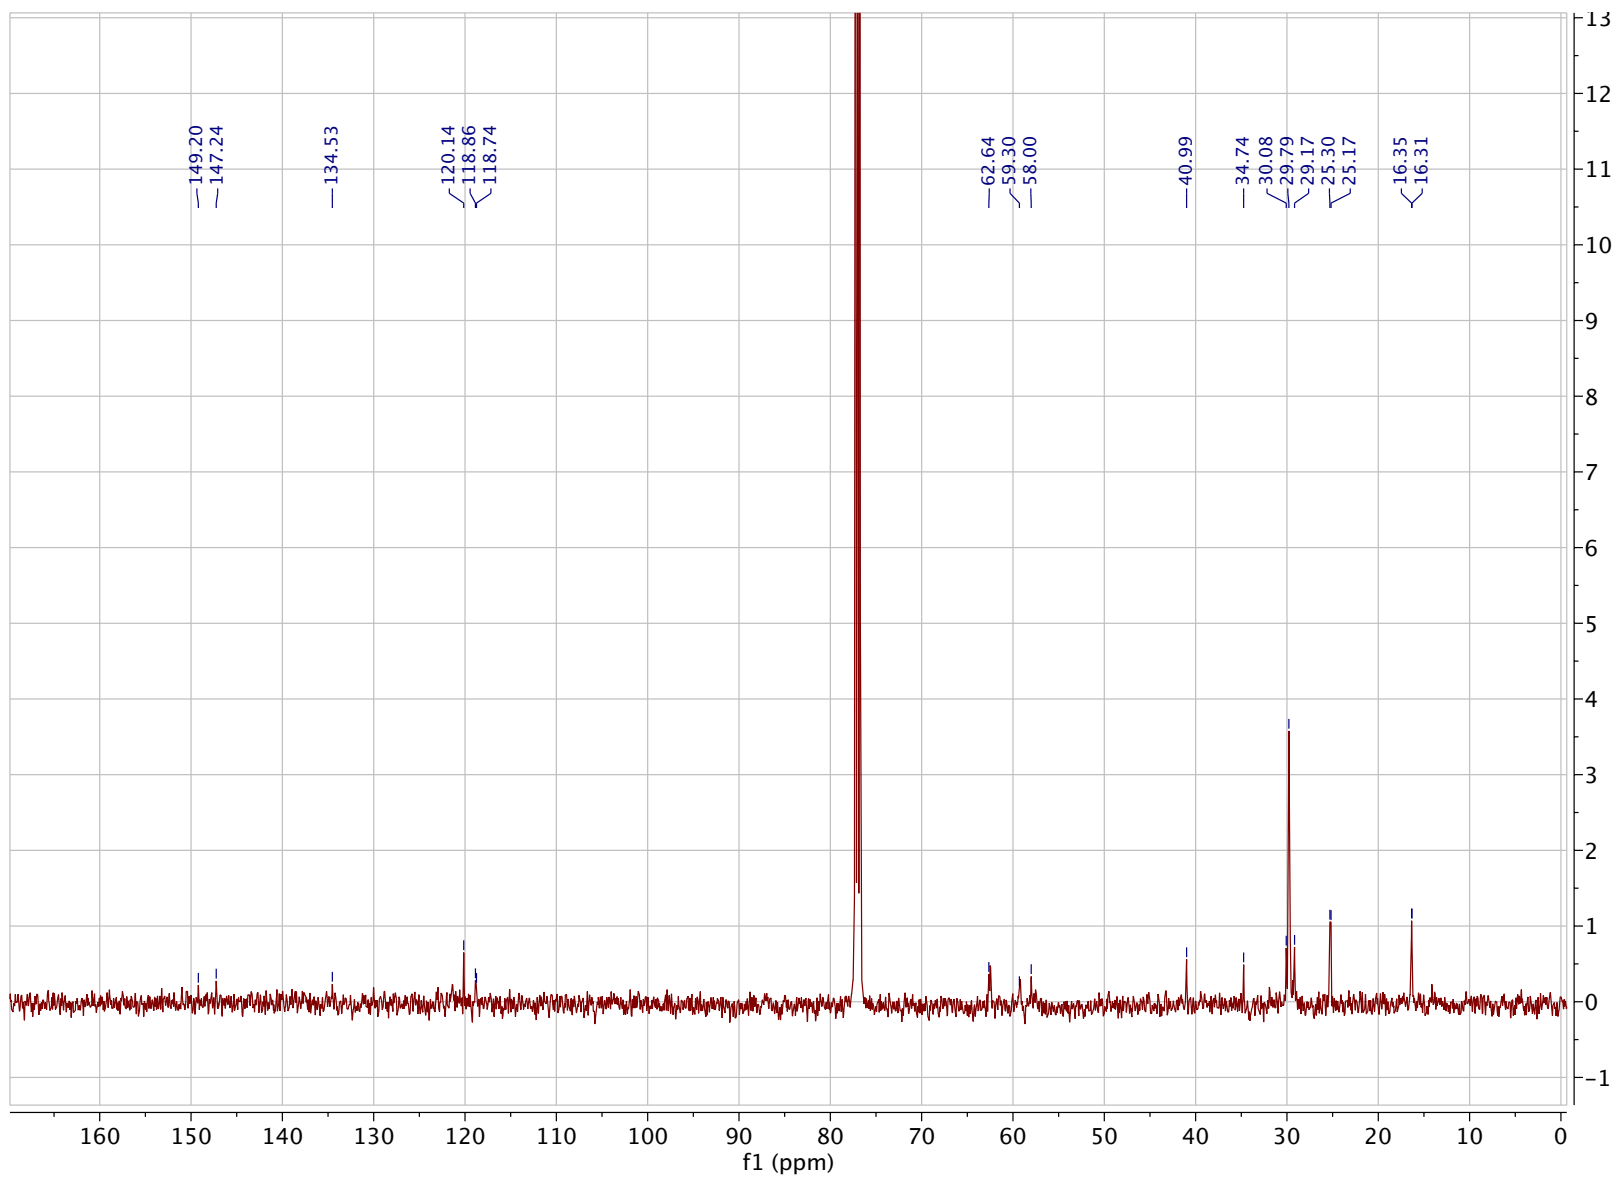

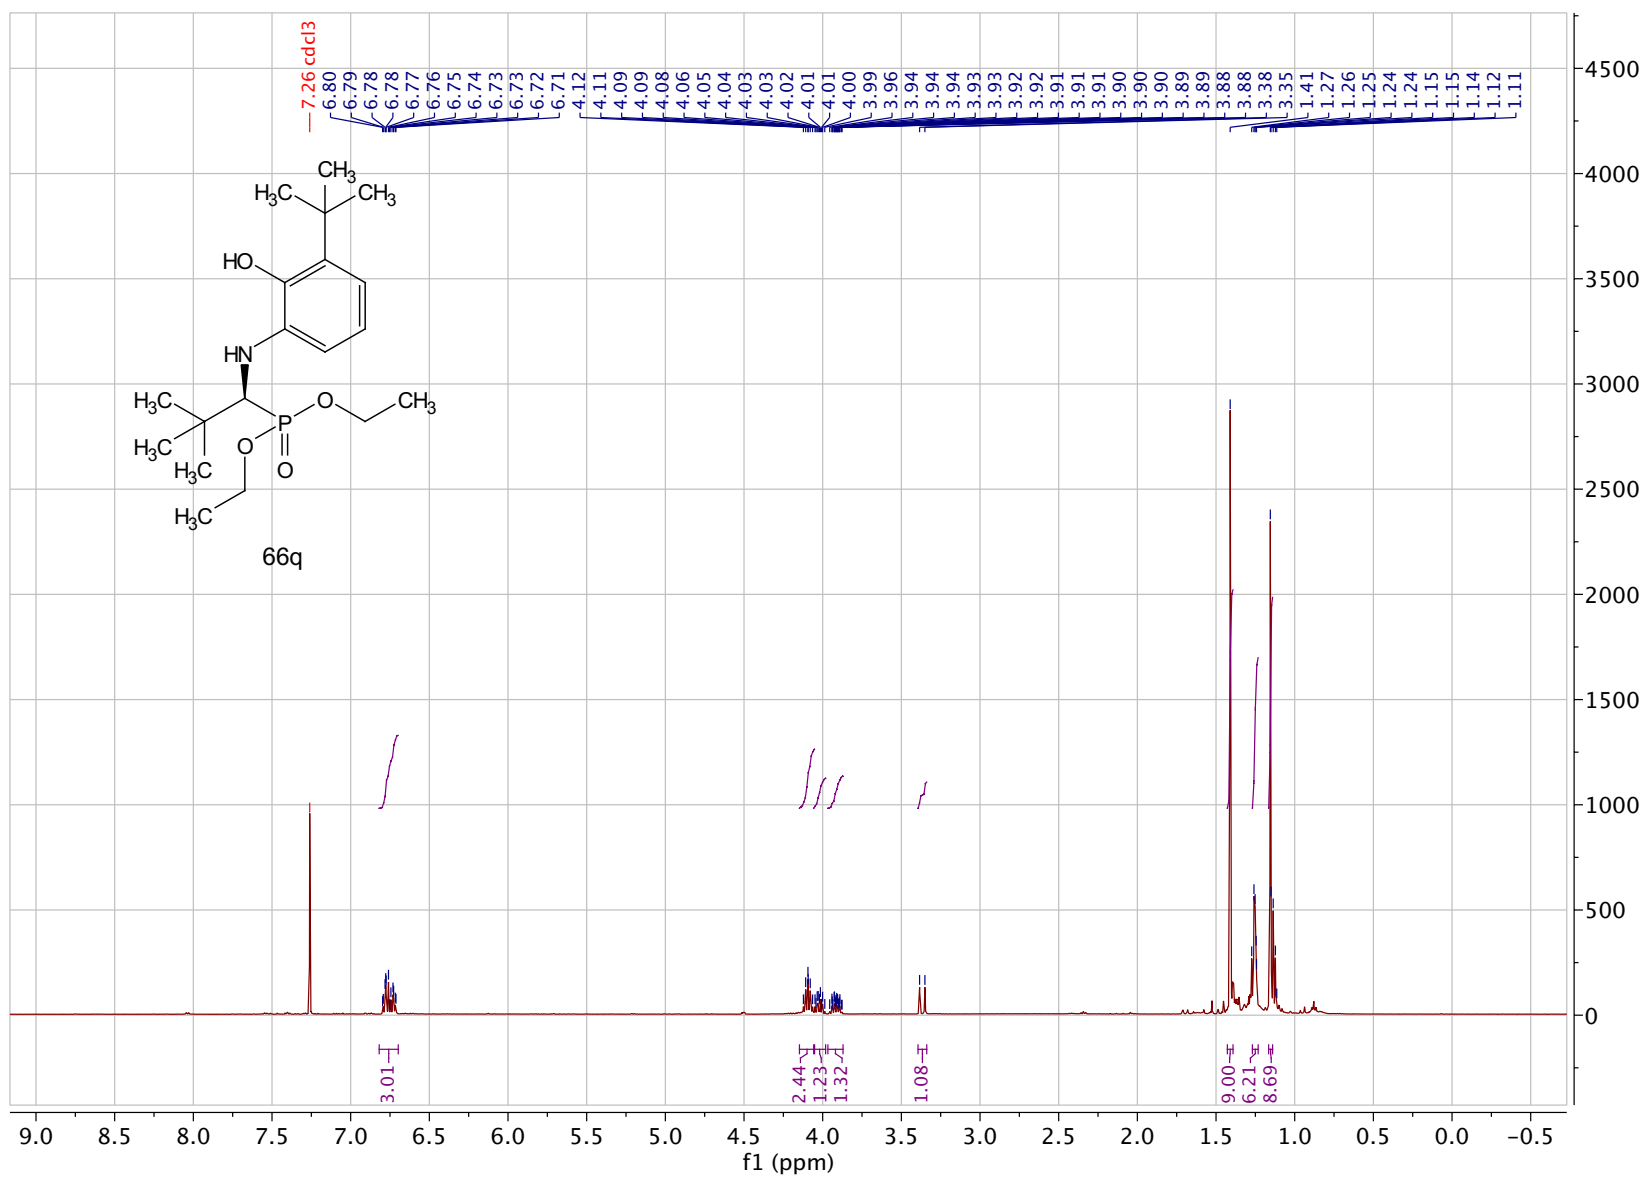

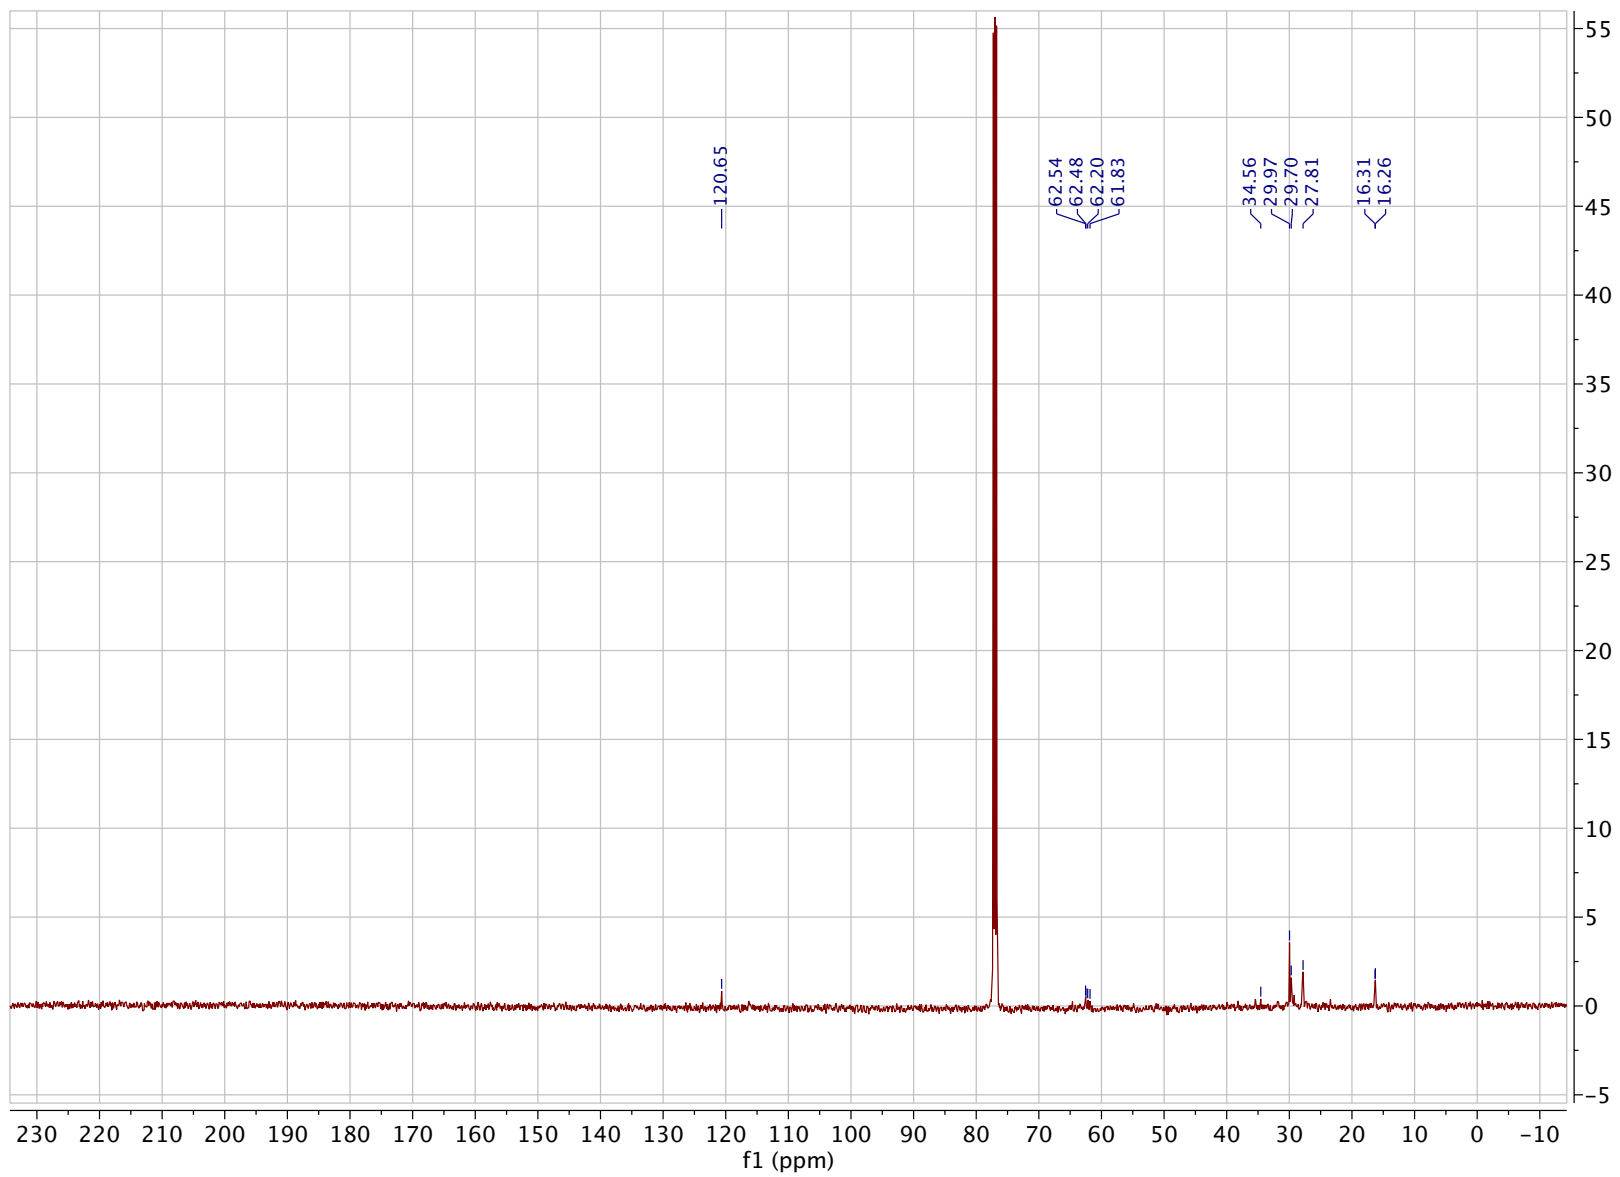

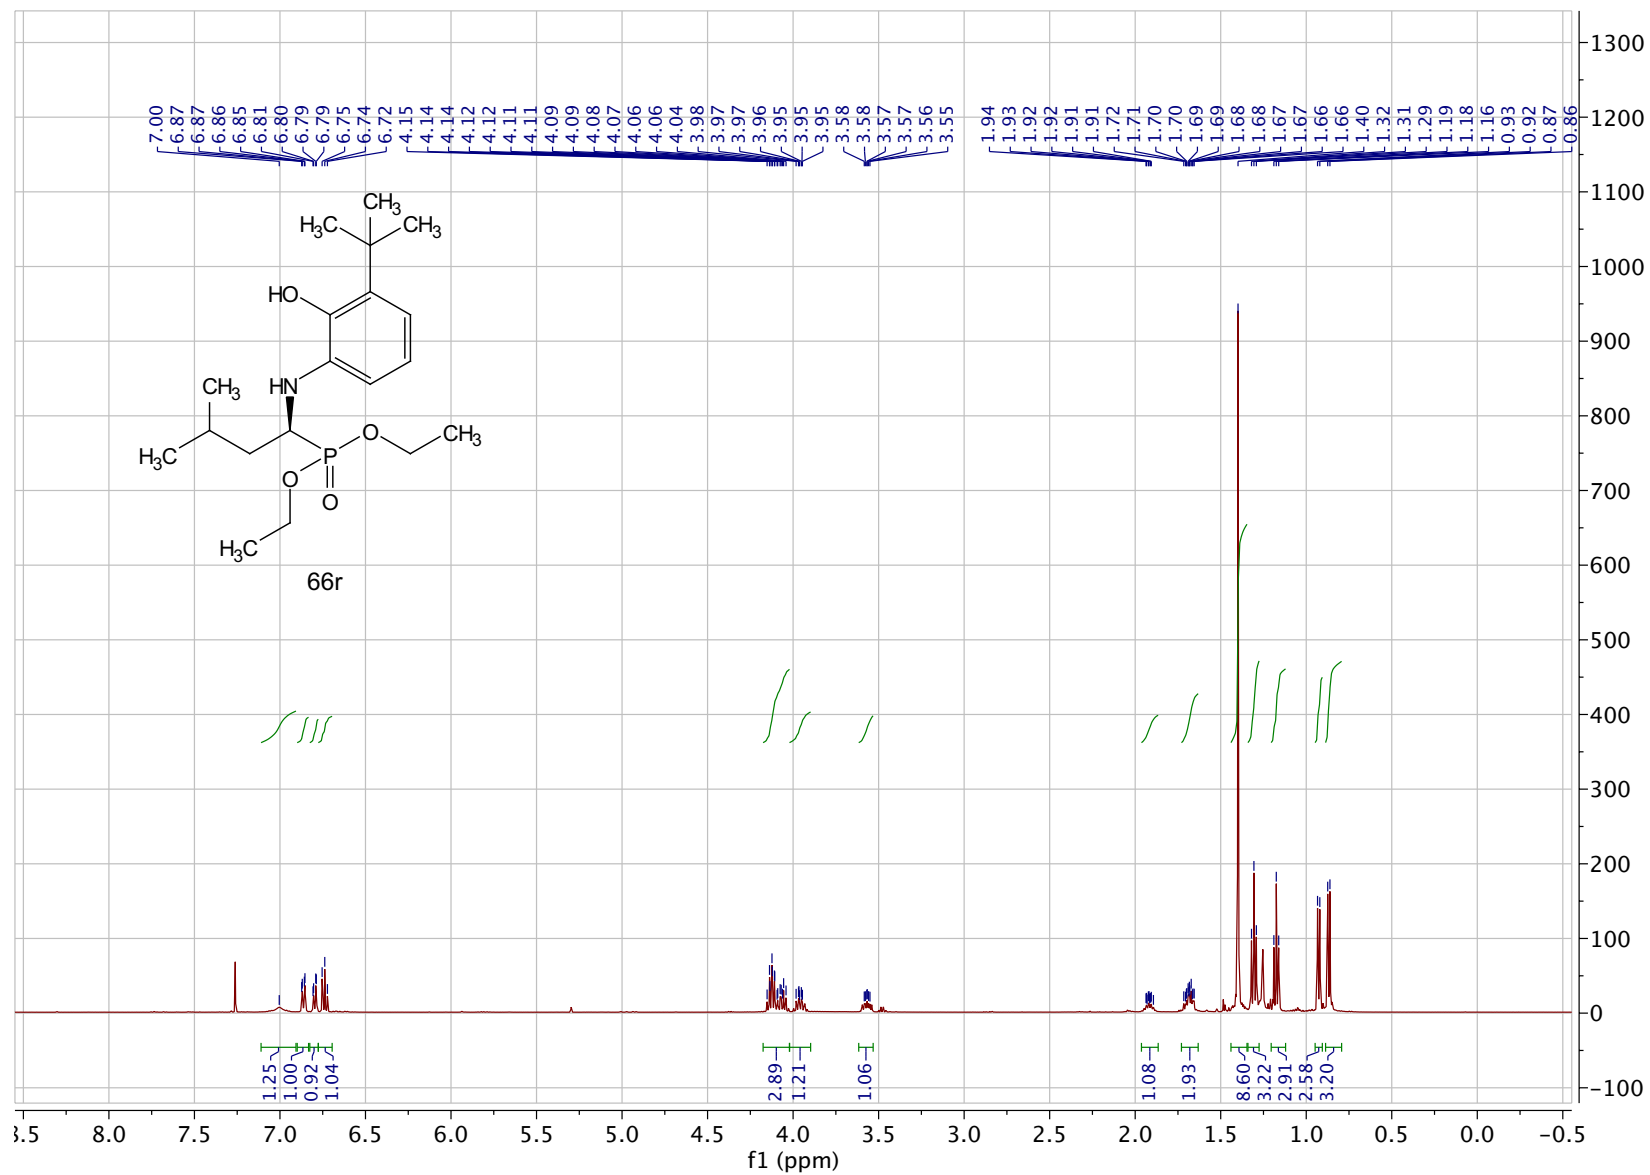

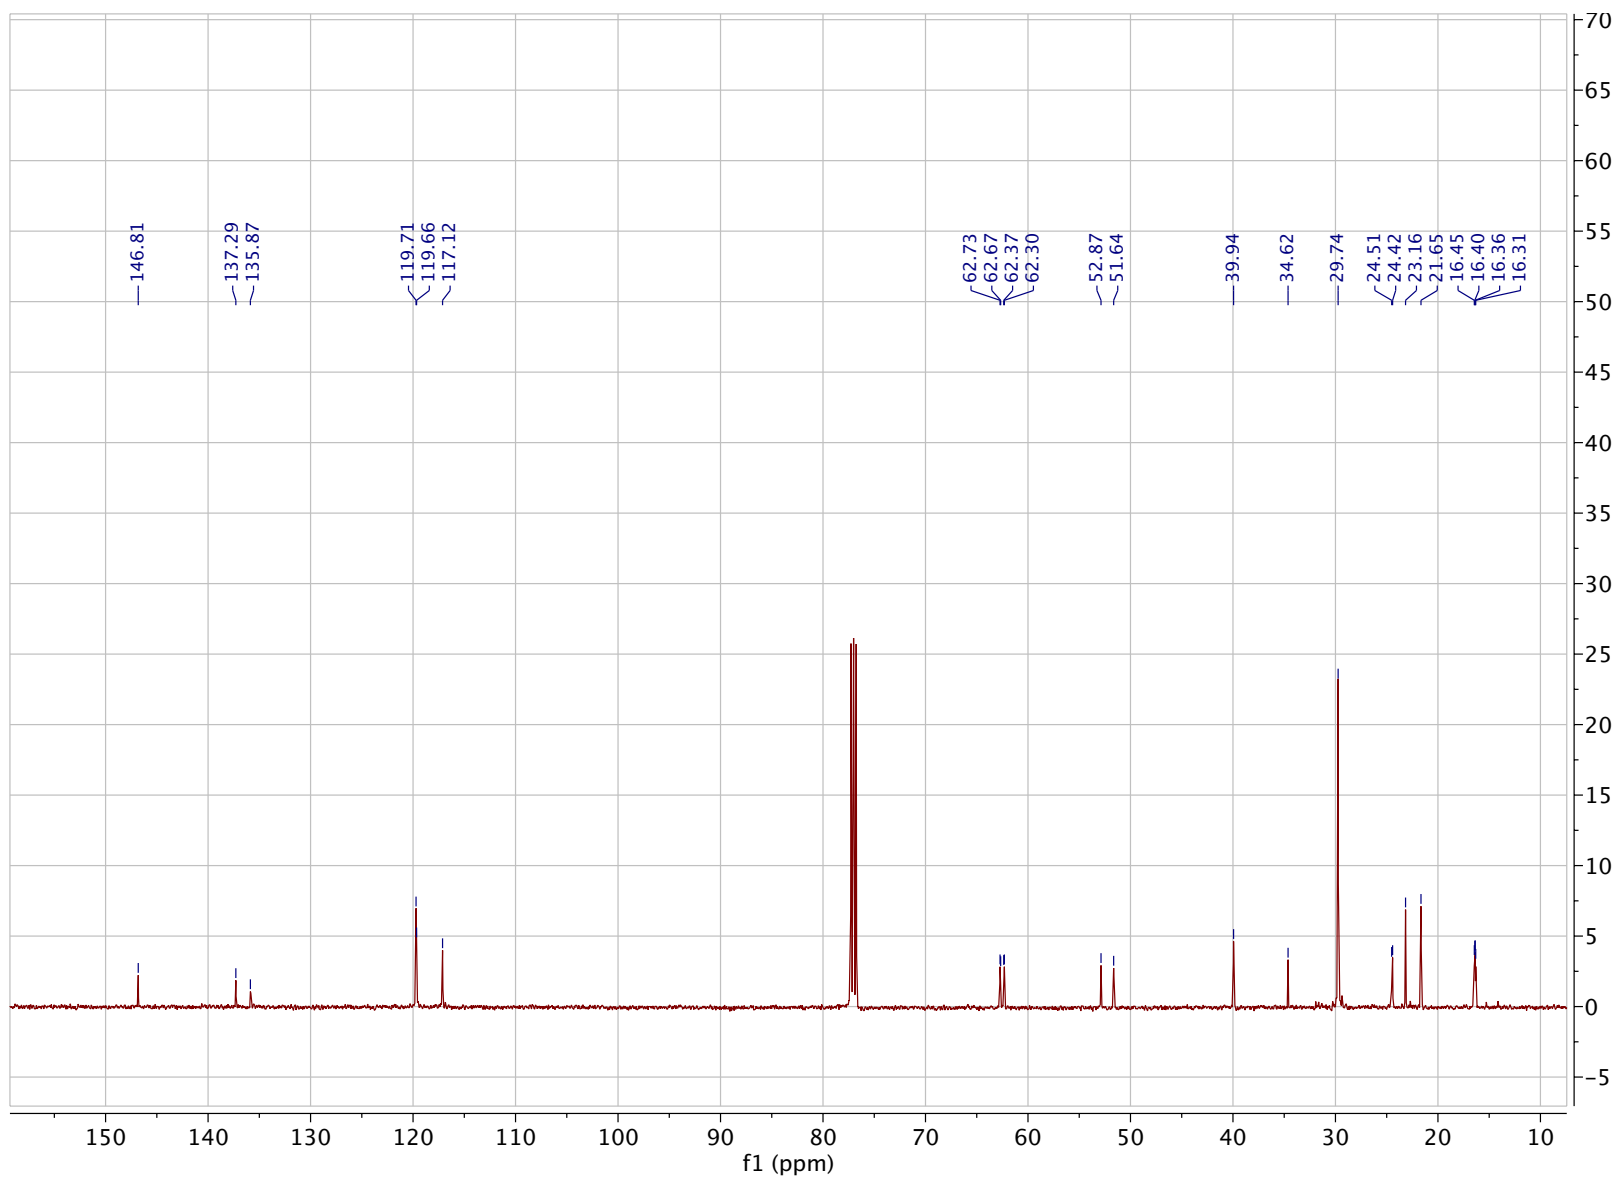

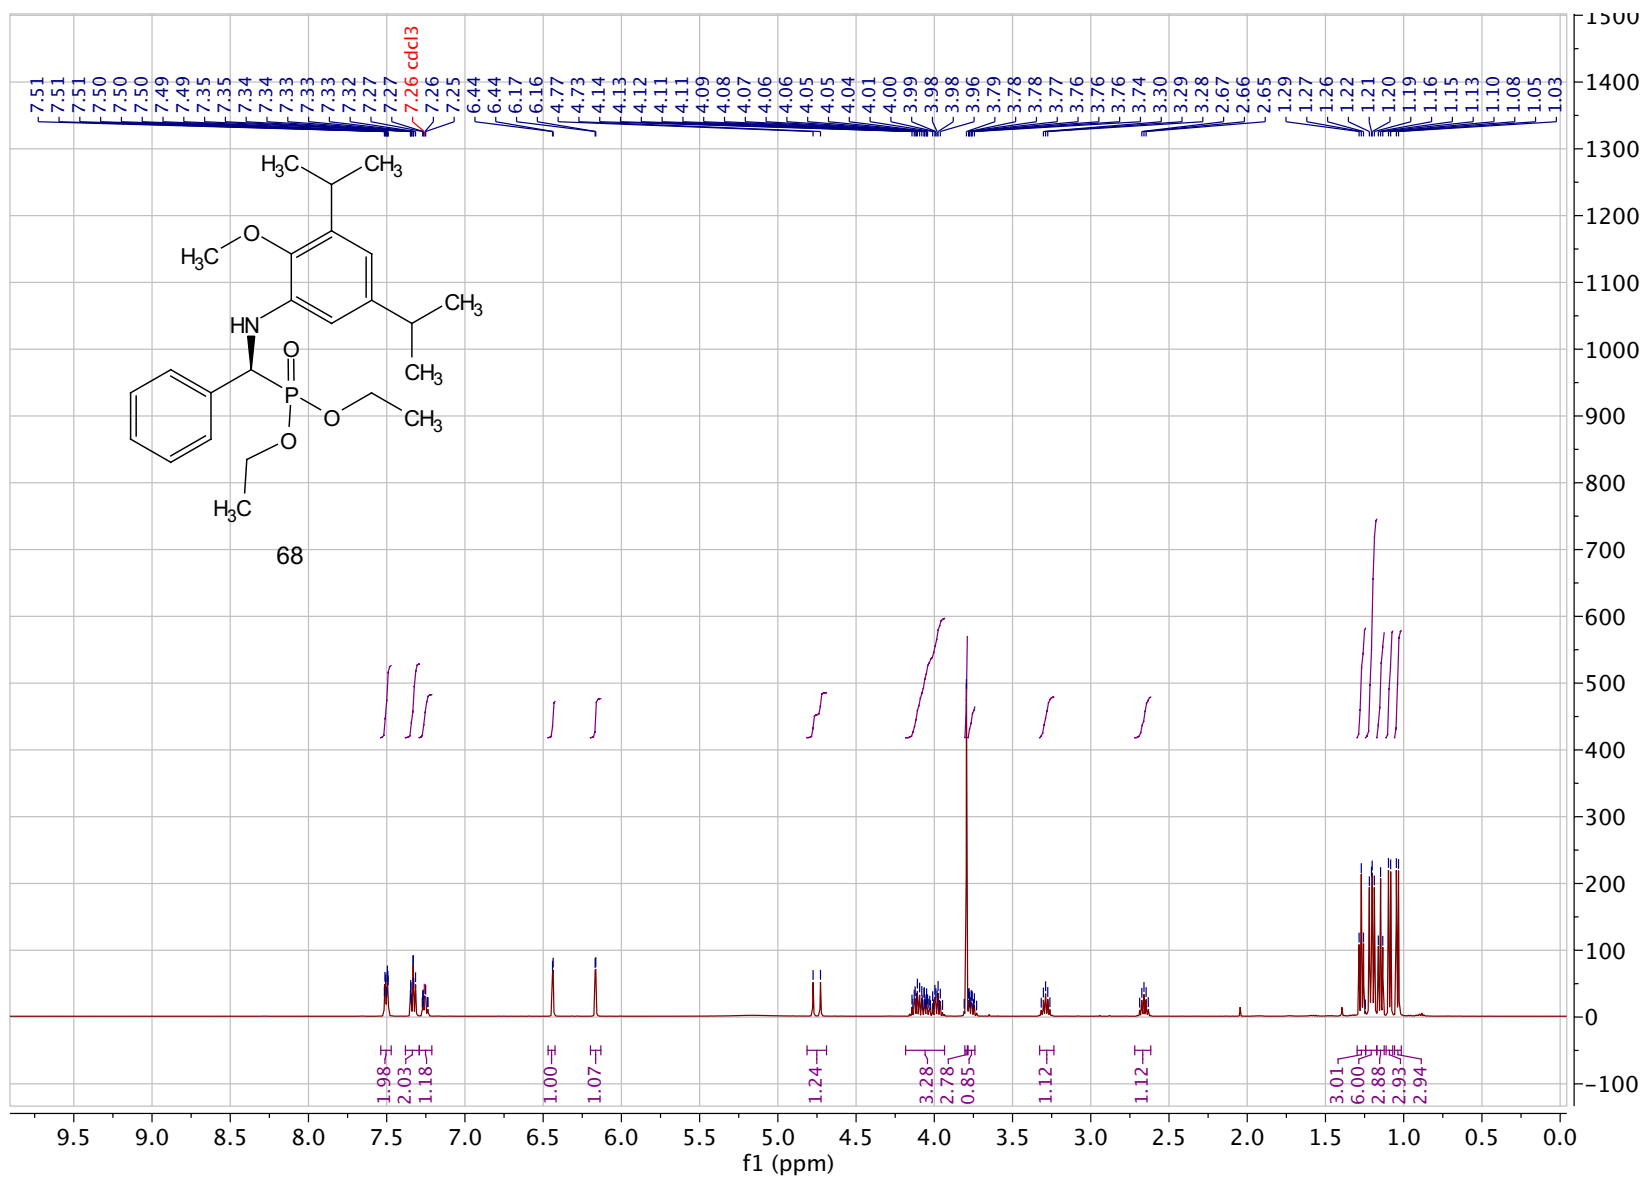

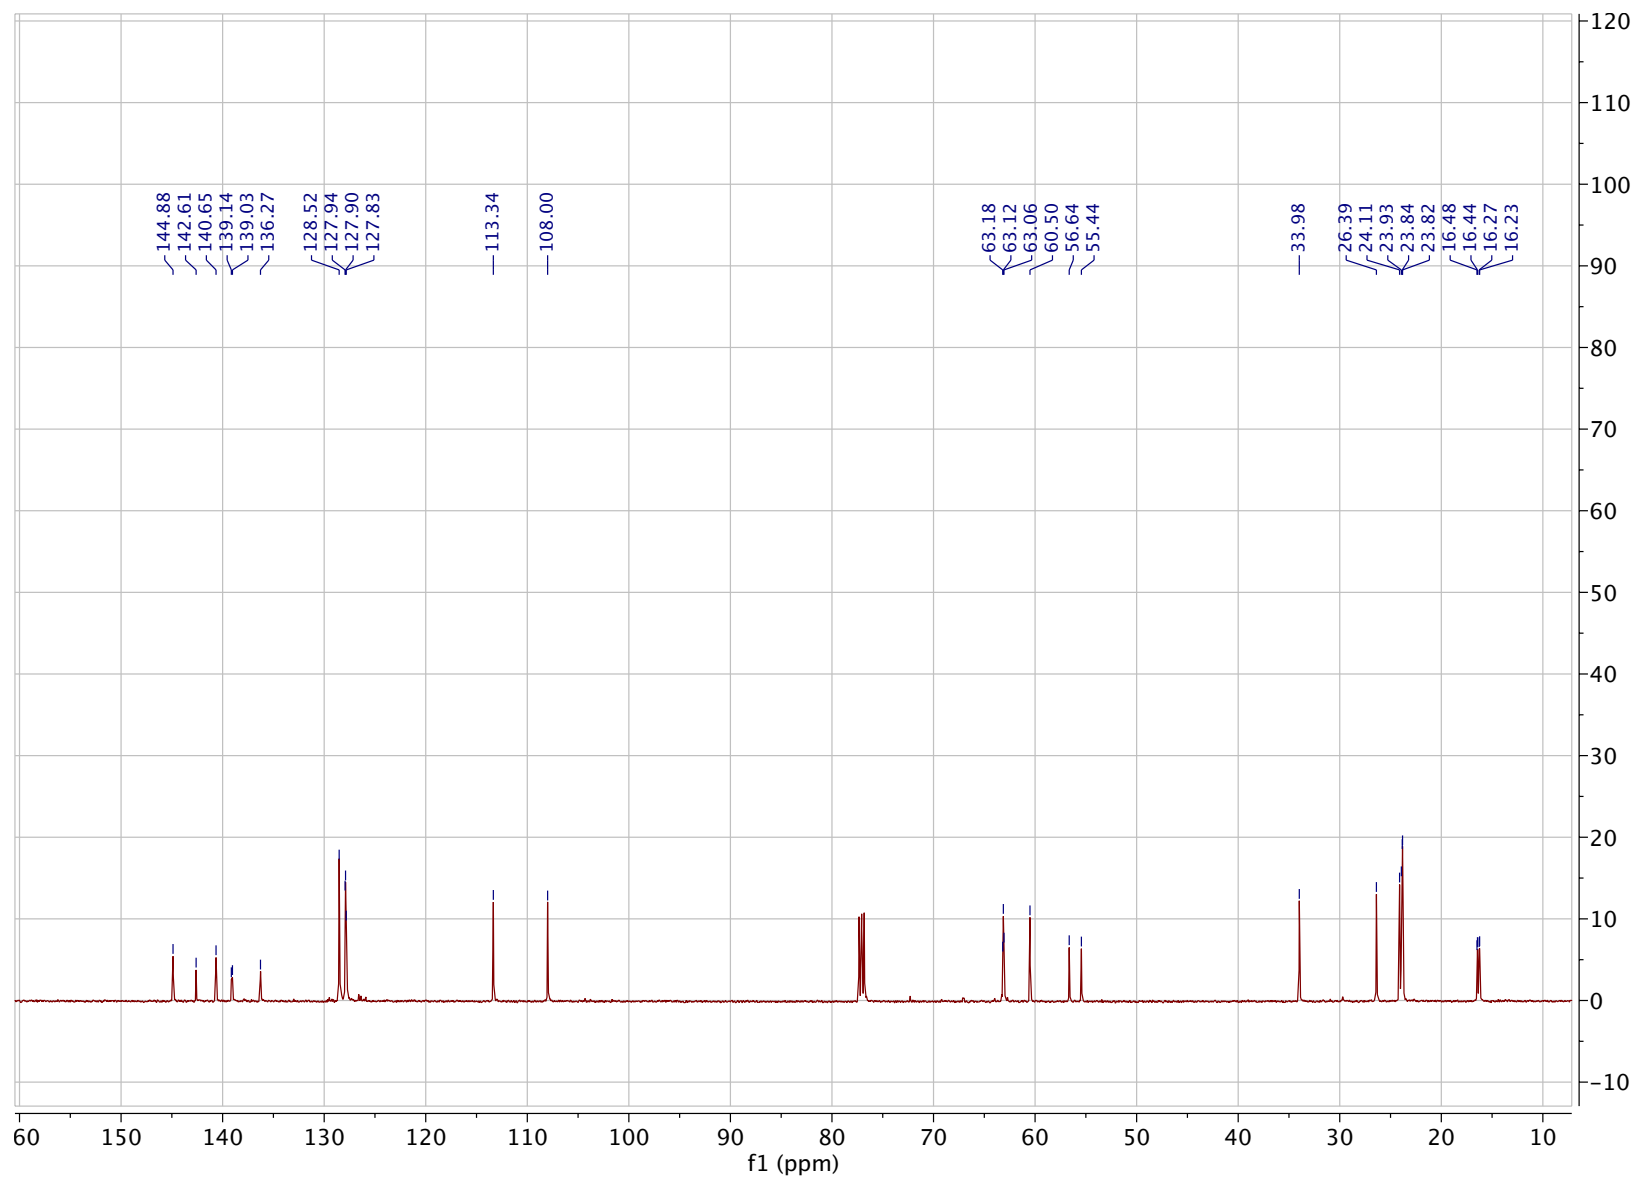

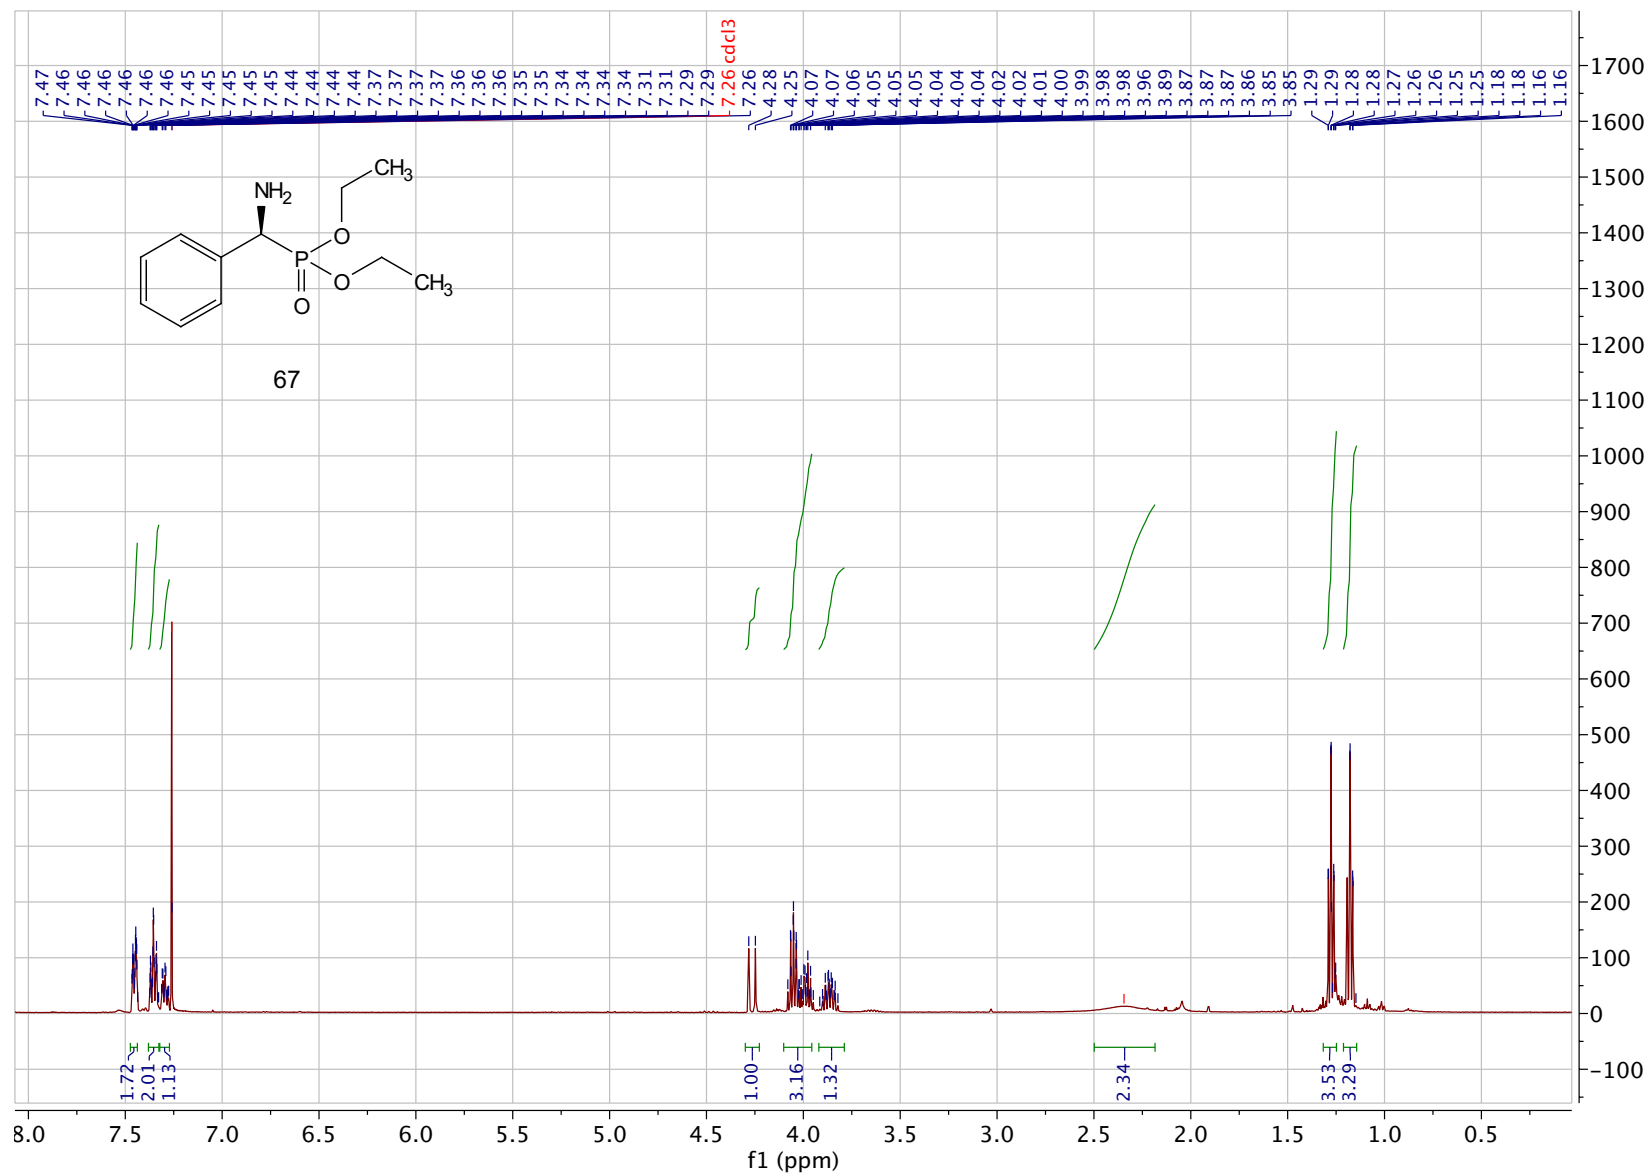

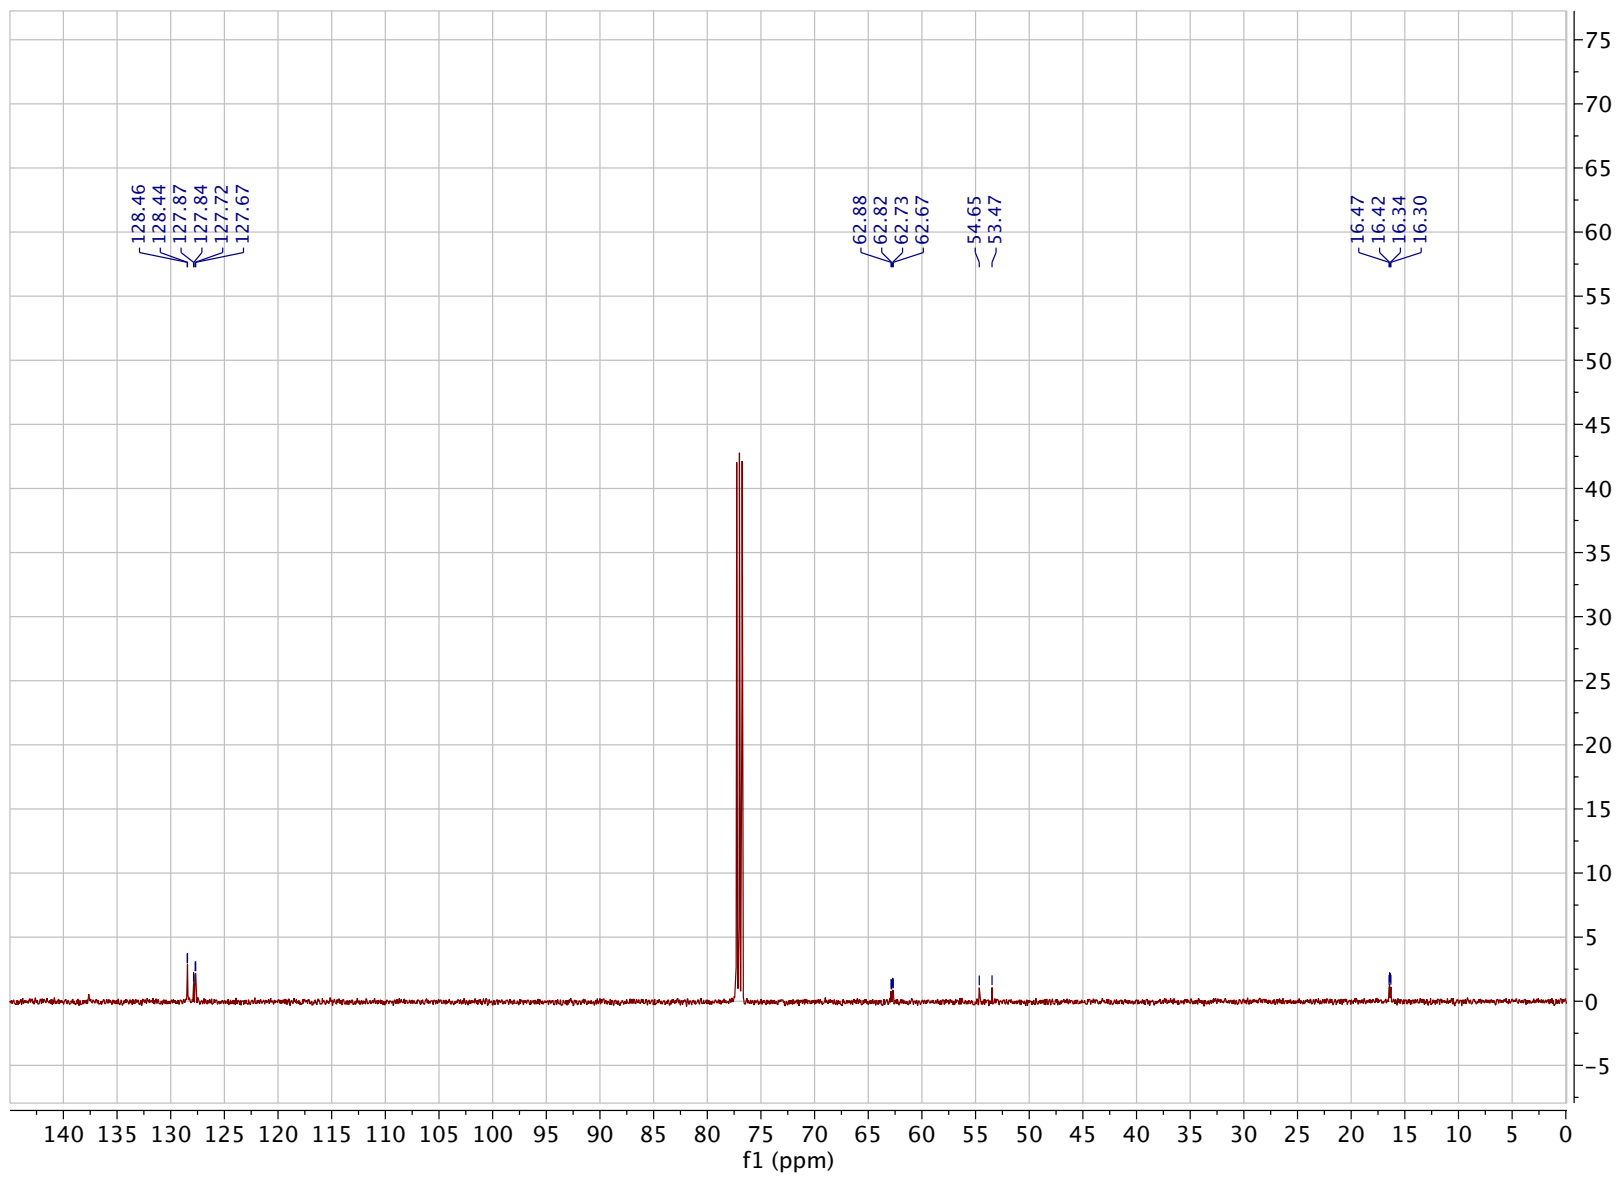

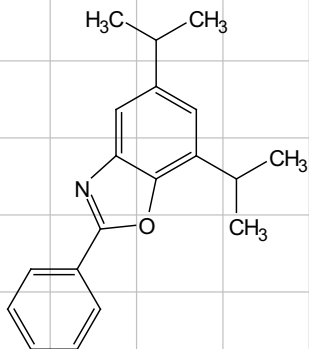

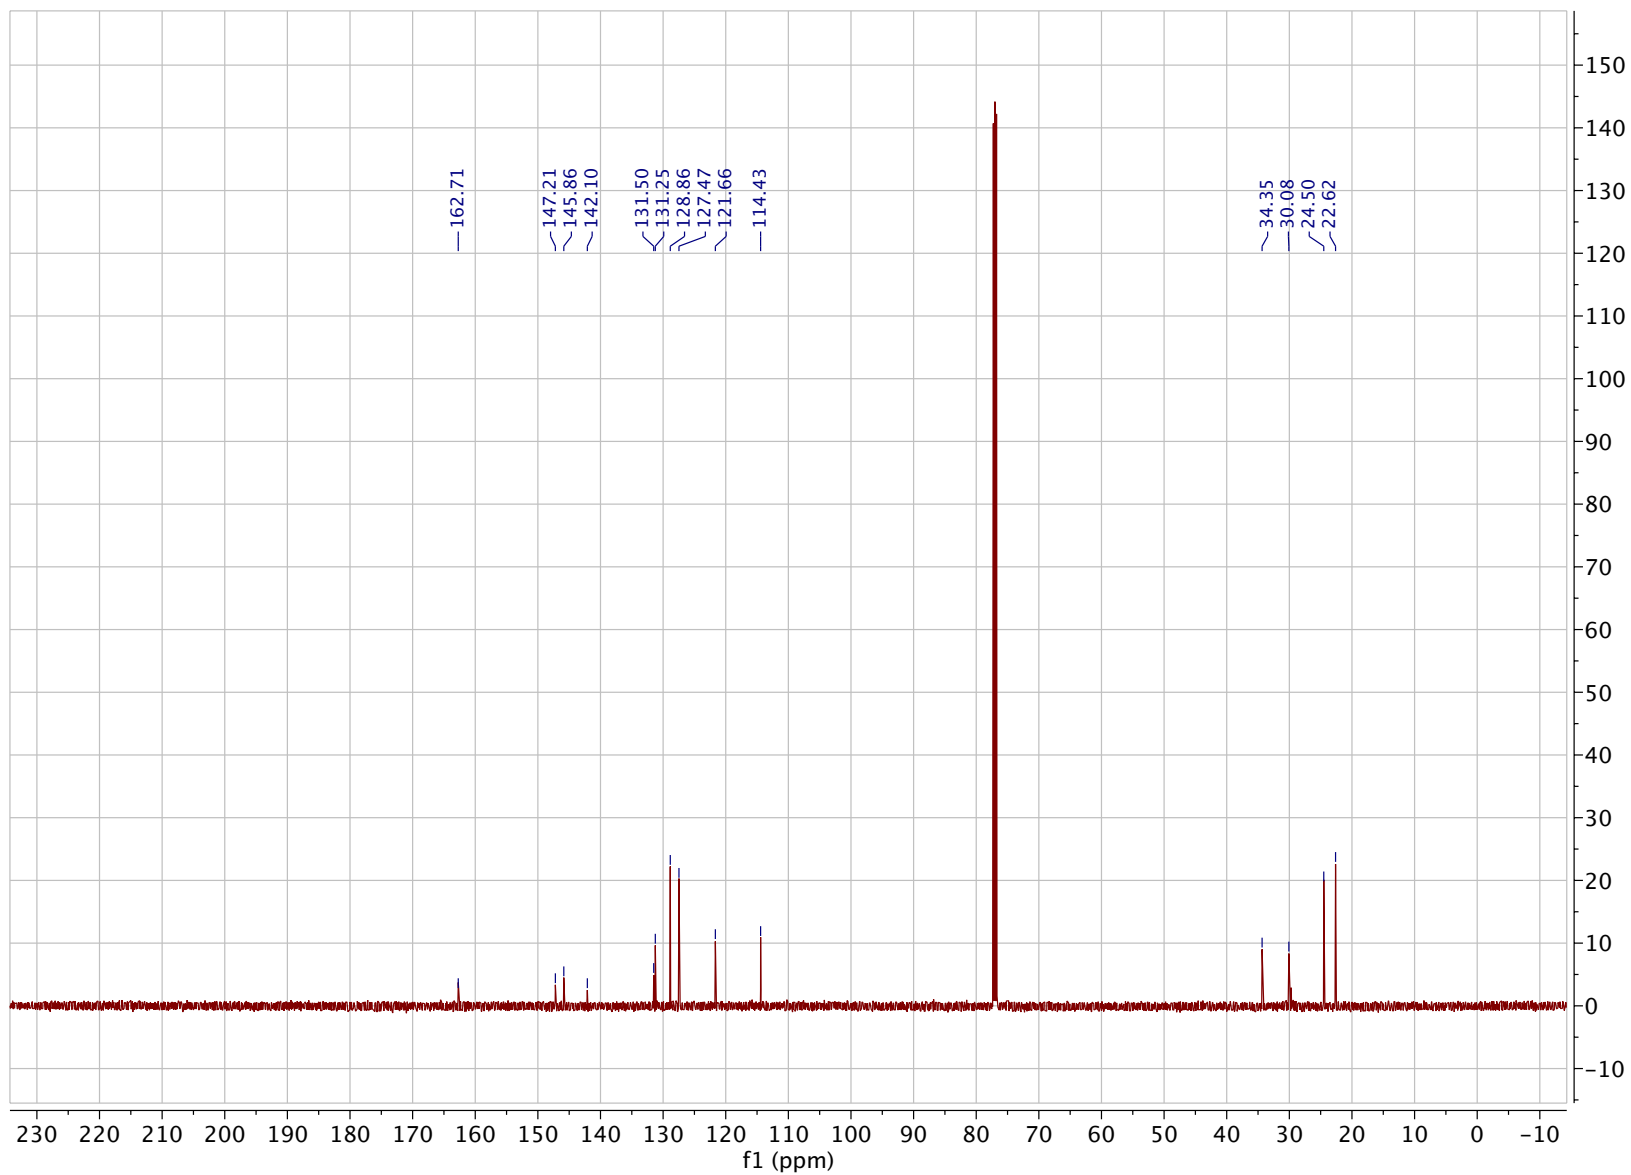

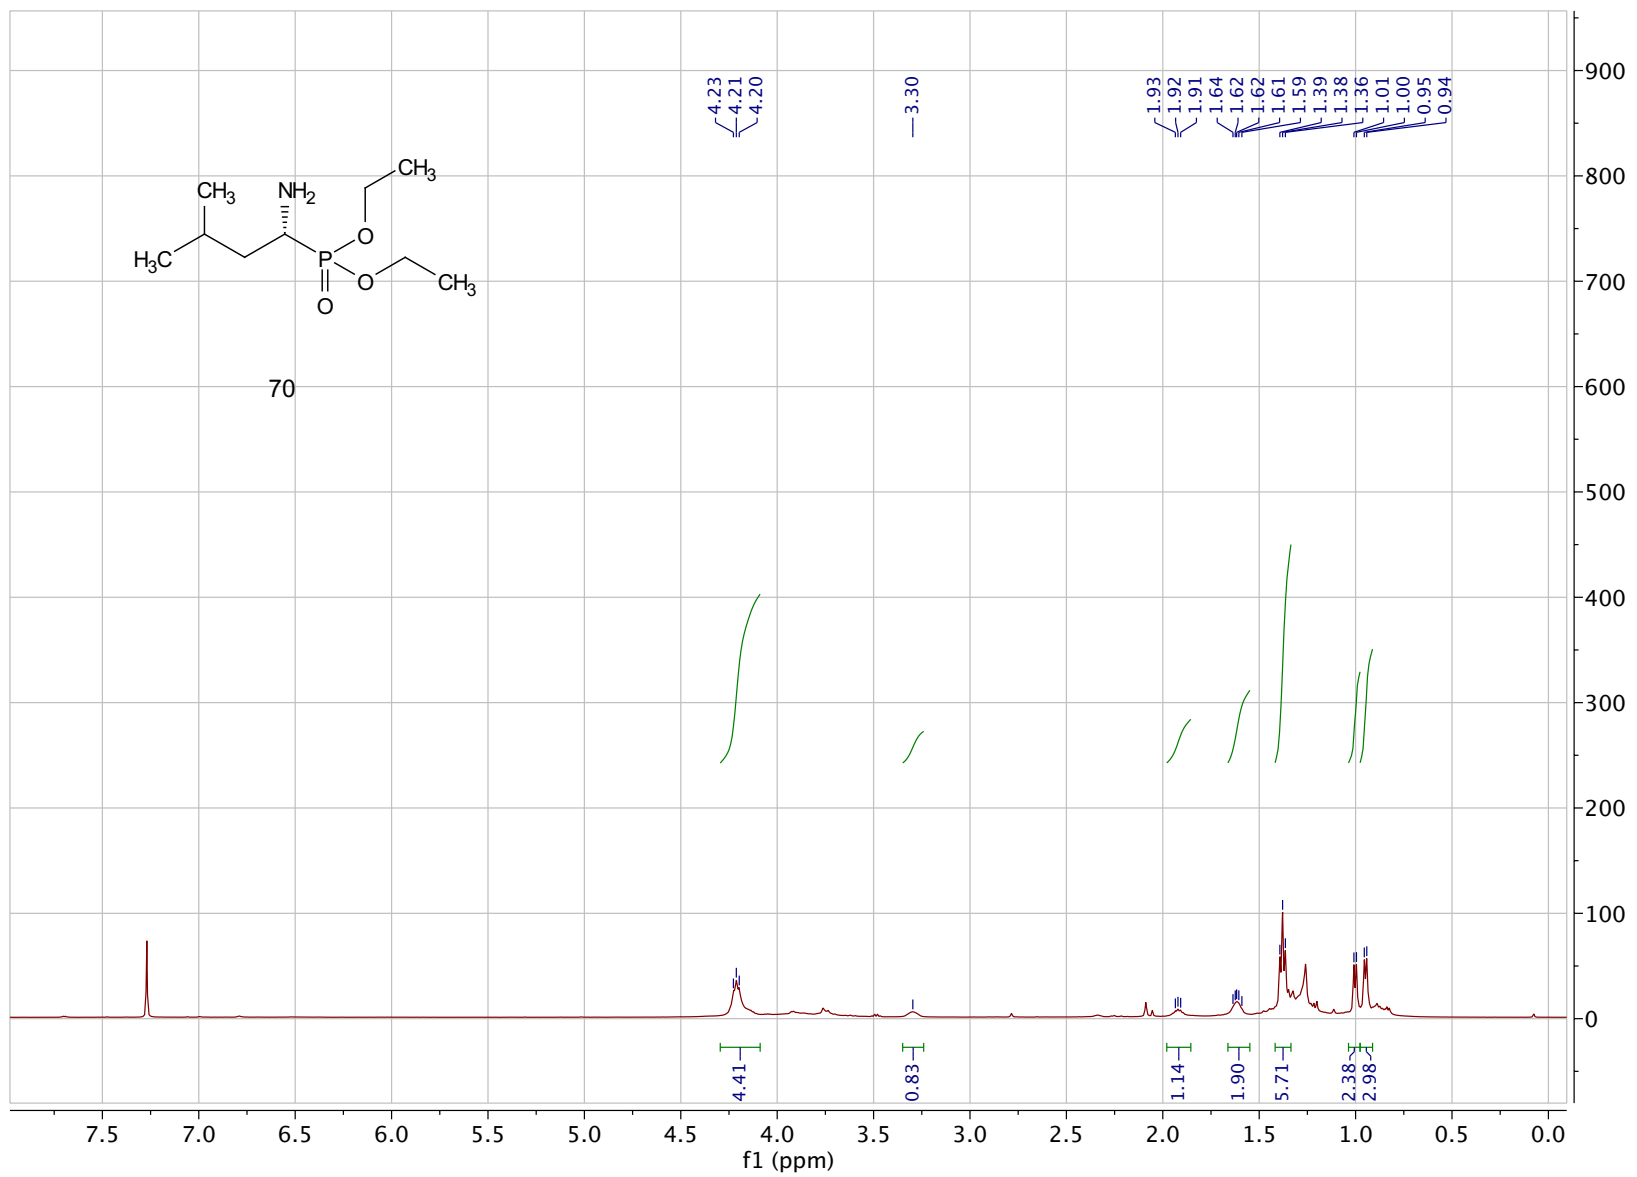

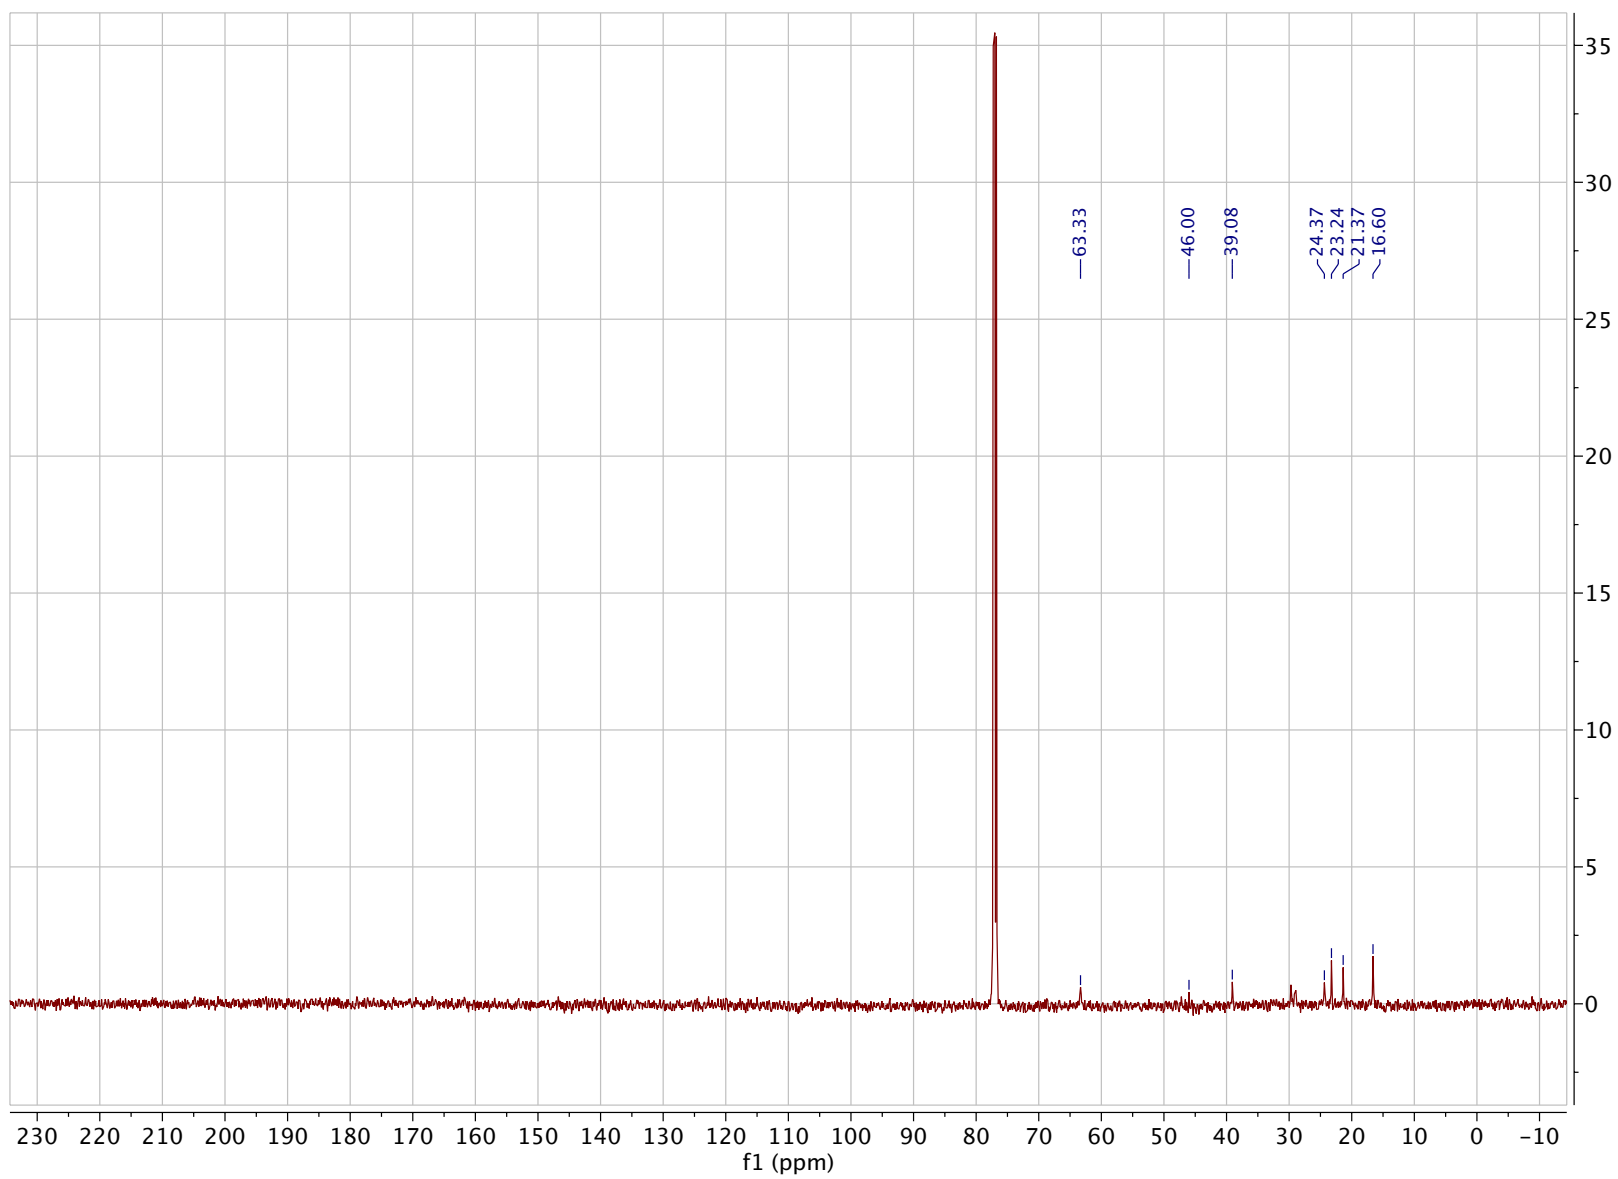

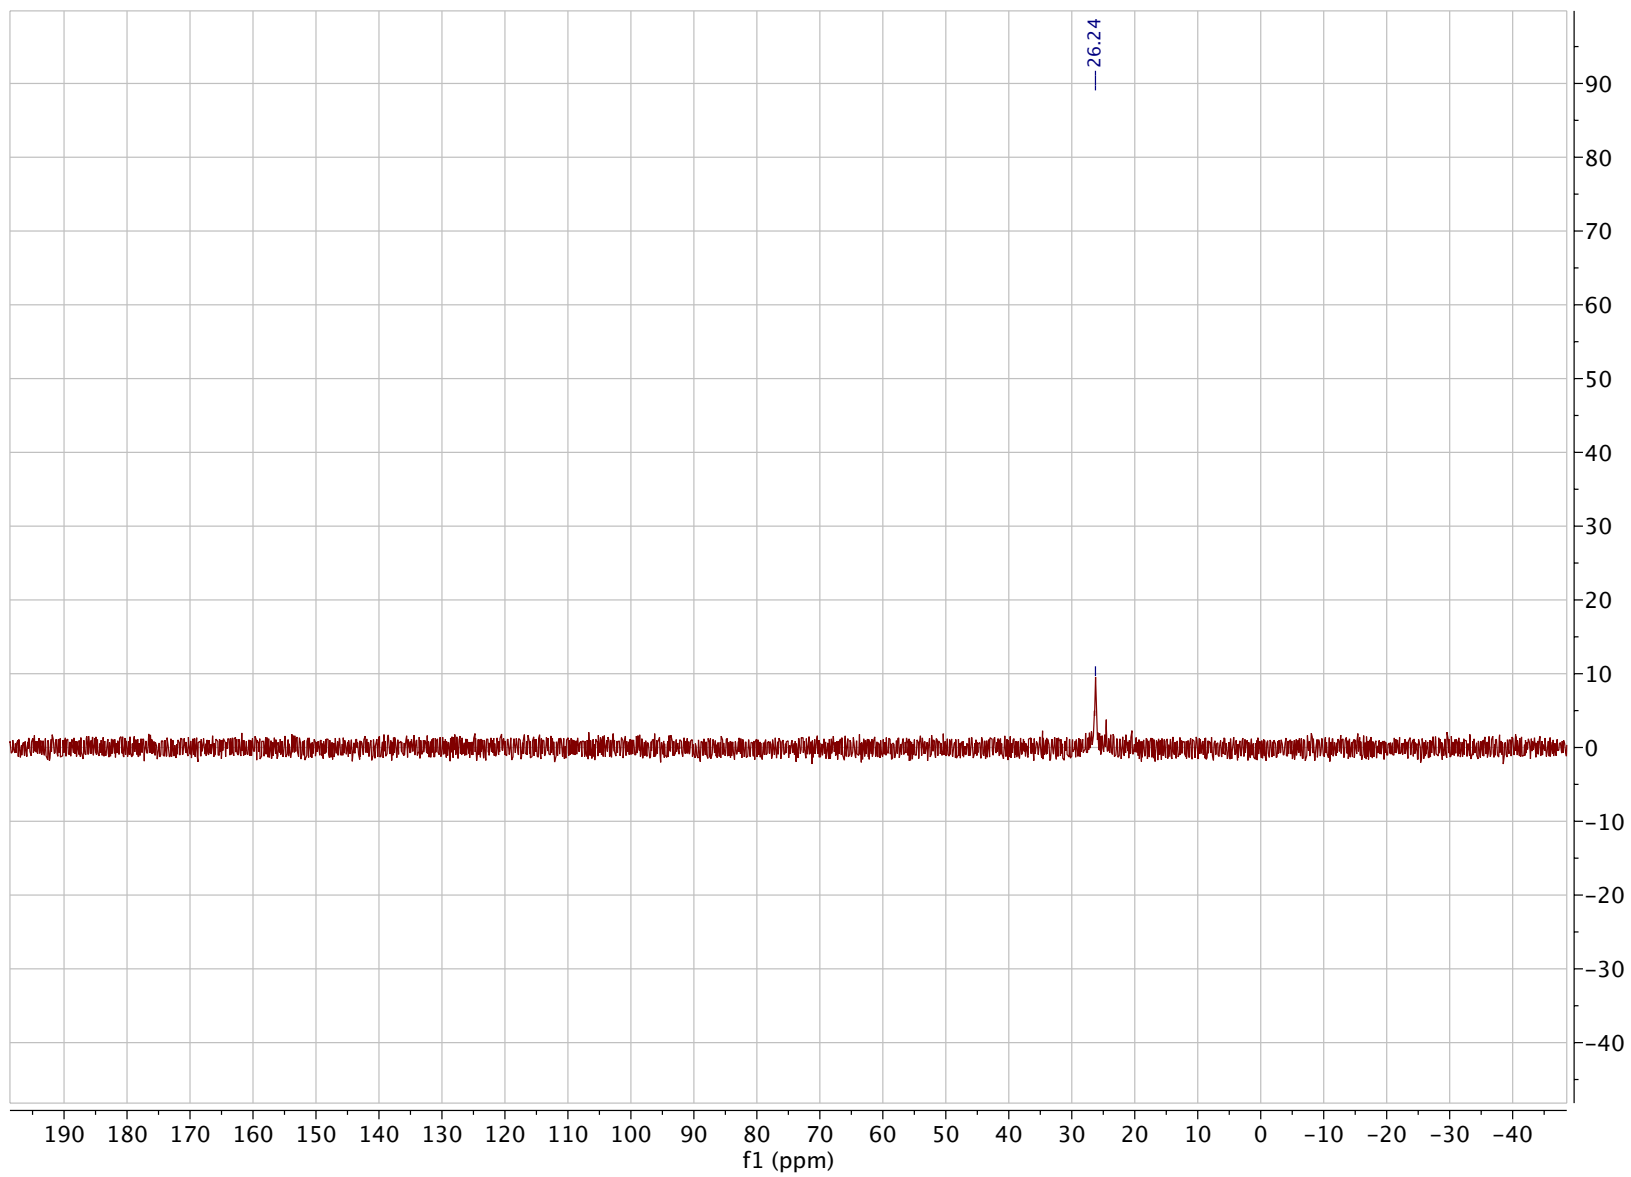

Supplement: SC-012-D1SC03222D-s002 [file SC-012-D1SC03222D-s002.pdf]
